# Supplementary material for: Tumor-derived exosomes RNA expression profiling identifies the prognosis, immune characteristics, and treatment in HR+/HER2-breast cancer
Source: publisher site journal article supplement (doi:10.18632/aging.204986), 2023-08-29
Supplement: Supplementary file [file aging-v15i16-204986-supplementary-material-SD1.pdf]

## SUPPLEMENTARY TABLES

**Supplementary Table 1. Primer sequences.**

$\beta$ -actin:  
 Forward primer: CTGGCCGGGACCTGACT  
 Reverse primer: TCCTTAATGTCACGCACGATTT  
 PDPK1  
 Forward primer: GGAACAGCGCAGTACGTTTCT  
 Reverse primer: CTCGTTTCCAGCTCGGAATGG  
 WSB2  
 Forward primer: TTGCTACGGGACTCAACGATG  
 Reverse primer: GTGACGCGGAGACCAAATCA  
 PIR  
 Forward primer: GAGCAGTCGGAAGGGGTTG  
 Reverse primer: TTA ACTCGGGTCTGCCAATGC  
 MTHFD2  
 Forward primer: AGGACGAATGTGTTTGGATCAG  
 Reverse primer: GGAATGCCAGTTCGCTTGATTA

**Supplementary Table 2. Clinical characteristics of enrolled patients.**

|           | recoded ID | Age | Type                      | Grade | Maximum tumor diameter            | Number of lymph node metastases   | Immunohistochemistry |       |      |       |
|-----------|------------|-----|---------------------------|-------|-----------------------------------|-----------------------------------|----------------------|-------|------|-------|
|           |            |     |                           |       | (Measured according to pathology) | (Measured according to pathology) | ER                   | PR    | Her2 | Ki-67 |
| patient 1 | 565774     | 62  | Invasive ductal carcinoma | II    | 2.0cm                             | 0                                 | 100%+                | 100%+ | 0    | 10%   |
| patient 2 | 565297     | 59  | Invasive ductal carcinoma | II    | 1.9cm                             | 0                                 | 90%+                 | 80%+  | 0    | 20%   |
| patient 3 | 563841     | 60  | Invasive ductal carcinoma | II    | 1.9cm                             | 0                                 | 60%+                 | 90%+  | 1+   | 5%    |

**Supplementary Table 3. Model genes and their coefficients.**

| gene symbol | gene name          | coef              |
|-------------|--------------------|-------------------|
| MTHFD2      | ENSG00000065911.13 | 0.10523284074475  |
| PIR         | ENSG00000087842.11 | 0.479944592959224 |
| PDPK1       | ENSG00000140992.19 | 0.8754054718031   |
| WSB2        | ENSG00000176871.9  | 0.423554406918477 |
