# Supplementary material for: Tumor-derived exosomes RNA expression profiling identifies the prognosis, immune characteristics, and treatment in HR+/HER2-breast cancer
Source: Aging (Albany NY). 2023 Aug 29;15(16):8471–86. doi: 10.18632/aging.204986 (PMC10497011; doi:10.18632/aging.204986)
Supplement: Supplementary Table 4 [file aging-15-204986-s002.xlsx]

## Sheet: Table S4
Supplementary Table 4. Exosomes score (ES) and subgroups of HR+/HER2-breast cancer patients in TCGA.
sample	OS	OS.Time	consensus_subgroup	ES	ES_subgroup
TCGA-D8-A1XO-01A-11R-A14M-07	0	242	exoB	4.3638	Low_Score
TCGA-E2-A14U-01A-11R-A22K-07	0	838	exoB	4.86468	Low_Score
TCGA-E2-A15T-01A-11R-A115-07	0	267	exoA	5.86926	High_Score
TCGA-EW-A1IX-01A-12R-A144-07	0	1082	exoB	4.53527	Low_Score
TCGA-B6-A408-01A-12R-A24H-07	0	1519	exoA	4.96305	Low_Score
TCGA-E2-A1IE-01A-11R-A13Q-07	0	983	exoA	6.10924	High_Score
TCGA-E2-A10E-01A-21R-A10J-07	0	418	exoA	4.75509	Low_Score
TCGA-BH-A0H5-01A-21R-A115-07	0	1080	exoB	4.87541	Low_Score
TCGA-BH-A1FD-01A-11R-A13Q-07	1	1009	exoA	5.95103	High_Score
TCGA-AR-A0TR-01A-11R-A084-07	1	160	exoA	5.56902	High_Score
TCGA-AO-A0J8-01A-21R-A034-07	0	277	exoB	4.47797	Low_Score
TCGA-A2-A0SU-01A-11R-A084-07	0	1352	exoA	5.92904	High_Score
TCGA-AC-A2FF-01A-11R-A17B-07	0	1686	exoB	4.91427	Low_Score
TCGA-E2-A15S-01A-11R-A115-07	0	274	exoA	5.33902	High_Score
TCGA-D8-A3Z6-01A-11R-A239-07	0	185	exoB	4.83354	Low_Score
TCGA-D8-A1XV-01A-11R-A14M-07	0	147	exoA	4.91553	Low_Score
TCGA-A1-A0SJ-01A-11R-A084-07	0	416	exoA	5.2252	High_Score
TCGA-A8-A082-01A-11R-A00Z-07	0	549	exoA	5.08286	Low_Score
TCGA-A7-A13E-01A-11R-A12P-07	0	287	exoB	4.79183	Low_Score
TCGA-WT-AB44-01A-11R-A41B-07	0	791	exoB	3.31769	Low_Score
TCGA-A7-A3J0-01A-11R-A213-07	0	76	exoA	5.26894	High_Score
TCGA-D8-A27I-01A-11R-A16F-07	0	186	exoB	5.74033	High_Score
TCGA-BH-A0GY-01A-11R-A056-07	0	917	exoB	5.48249	High_Score
TCGA-A1-A0SB-01A-11R-A144-07	0	259	exoB	4.54806	Low_Score
TCGA-A7-A0DC-01A-11R-A00Z-07	0	273	exoA	5.00689	Low_Score
TCGA-A7-A3IZ-01A-11R-A213-07	0	148	exoA	5.55486	High_Score
TCGA-LL-A5YL-01A-12R-A29R-07	0	169	exoB	4.44116	Low_Score
TCGA-BH-A0DI-01A-21R-A12P-07	0	673	exoB	4.69865	Low_Score
TCGA-BH-A0H3-01A-11R-A12P-07	0	1149	exoB	5.13679	High_Score
TCGA-D8-A27K-01A-11R-A16F-07	0	119	exoB	5.32872	High_Score
TCGA-BH-A0E2-01A-11R-A056-07	0	376	exoB	5.32723	High_Score
TCGA-E2-A1L8-01A-11R-A13Q-07	0	1015	exoB	5.10888	Low_Score
TCGA-E2-A2P6-01A-11R-A19W-07	0	168	exoB	5.06266	Low_Score
TCGA-A8-A0A1-01A-11R-A00Z-07	0	365	exoA	5.30416	High_Score
TCGA-D8-A4Z1-01A-21R-A266-07	0	223	exoB	5.05031	Low_Score
TCGA-AR-A1AS-01A-11R-A12P-07	0	1150	exoB	5.89997	High_Score
TCGA-BH-A0HL-01A-11R-A10U-07	0	72	exoA	5.36383	High_Score
TCGA-A8-A09V-01A-11R-A034-07	0	457	exoA	5.08838	Low_Score
TCGA-GM-A4E0-01A-12R-A266-07	0	1753	exoB	4.39636	Low_Score
TCGA-A2-A04V-01A-21R-A034-07	1	1920	exoA	4.6828	Low_Score
TCGA-BH-A0BP-01A-11R-A115-07	0	1481	exoB	6.44084	High_Score
TCGA-AO-A12C-01A-11R-A10J-07	0	1994	exoB	4.84599	Low_Score
TCGA-BH-A0DS-01A-11R-A056-07	0	78	exoB	5.62052	High_Score
TCGA-E2-A15F-01A-11R-A115-07	0	469	exoA	5.90176	High_Score
TCGA-BH-A0H7-01A-13R-A056-07	0	702	exoA	5.61084	High_Score
TCGA-A8-A079-01A-21R-A00Z-07	0	274	exoA	6.06843	High_Score
TCGA-AO-A0JD-01A-11R-A056-07	0	1813	exoA	5.77481	High_Score
TCGA-D8-A1XB-01A-11R-A14D-07	0	201	exoB	4.69307	Low_Score
TCGA-BH-A0BS-01A-11R-A12P-07	0	1641	exoA	5.45016	High_Score
TCGA-BH-A1EX-01A-11R-A13Q-07	1	1508	exoB	5.97305	High_Score
TCGA-D8-A1X8-01A-11R-A14M-07	0	272	exoA	5.1644	High_Score
TCGA-HN-A2OB-01A-21R-A27Q-07	0	1849	exoB	4.40618	Low_Score
TCGA-D8-A1J8-01A-11R-A13Q-07	0	256	exoB	5.79661	High_Score
TCGA-A8-A06P-01A-11R-A00Z-07	0	396	exoB	5.09614	Low_Score
TCGA-D8-A3Z5-01A-41R-A24H-07	0	441	exoB	4.73243	Low_Score
TCGA-BH-A0DT-01A-21R-A12D-07	0	1170	exoB	5.03038	Low_Score
TCGA-A1-A0SQ-01A-21R-A144-07	0	554	exoA	4.62578	Low_Score
TCGA-BH-A0BR-01A-21R-A115-07	0	1633	exoB	5.32303	High_Score
TCGA-GM-A3XN-01A-12R-A22U-07	0	1641	exoB	4.45265	Low_Score
TCGA-A8-A09B-01A-11R-A00Z-07	0	365	exoA	5.54642	High_Score
TCGA-E2-A10A-01A-21R-A115-07	0	352	exoA	5.99146	High_Score
TCGA-AN-A04A-01A-21R-A034-07	0	90	exoB	4.64191	Low_Score
TCGA-A2-A0SV-01A-11R-A084-07	1	825	exoB	5.26709	High_Score
TCGA-A2-A0ET-01A-31R-A034-07	0	807	exoA	5.45065	High_Score
TCGA-BH-A0GZ-01A-11R-A056-07	0	328	exoA	4.18152	Low_Score
TCGA-A2-A25A-01A-12R-A16F-07	0	2968	exoB	4.83052	Low_Score
TCGA-EW-A1J5-01A-11R-A13Q-07	0	227	exoA	4.64092	Low_Score
TCGA-D8-A27V-01A-12R-A17B-07	0	73	exoB	5.30522	High_Score
TCGA-A2-A0CT-01A-31R-A056-07	0	1918	exoA	5.66246	High_Score
TCGA-AR-A0TT-01A-31R-A084-07	0	1730	exoB	5.63307	High_Score
TCGA-LL-A8F5-01A-11R-A36F-07	0	189	exoB	4.9585	Low_Score
TCGA-A2-A0CU-01A-12R-A034-07	1	158	exoA	5.23873	High_Score
TCGA-D8-A1XG-01A-11R-A14D-07	0	75	exoA	5.57853	High_Score
TCGA-E2-A14S-01A-11R-A12D-07	0	834	exoA	4.97473	Low_Score
TCGA-D8-A1JS-01A-11R-A13Q-07	0	105	exoA	4.71884	Low_Score
TCGA-AC-A2B8-01A-11R-A17B-07	0	45	exoB	5.64558	High_Score
TCGA-A8-A08I-01A-11R-A00Z-07	0	365	exoA	6.44104	High_Score
TCGA-LL-A6FQ-01A-11R-A31O-07	0	80	exoB	4.10587	Low_Score
TCGA-LL-A442-01A-11R-A24H-07	0	109	exoA	5.36058	High_Score
TCGA-A2-A25B-01A-11R-A169-07	0	258	exoB	5.71146	High_Score
TCGA-AO-A1KT-01A-11R-A13Q-07	0	541	exoB	5.59757	High_Score
TCGA-LL-A5YP-01A-21R-A28M-07	0	99	exoB	5.76416	High_Score
TCGA-AR-A1AU-01A-11R-A12P-07	0	1409	exoA	4.65126	Low_Score
TCGA-A7-A26J-01A-11R-A169-07	0	68	exoA	5.08953	Low_Score
TCGA-A2-A0EM-01A-11R-A034-07	0	2758	exoA	5.41533	High_Score
TCGA-A7-A13D-01A-13R-A277-07	0	267	exoB	4.66966	Low_Score
TCGA-BH-A0HK-01A-11R-A056-07	0	178	exoB	4.81158	Low_Score
TCGA-D8-A27L-01A-11R-A16F-07	0	126	exoB	5.76156	High_Score
TCGA-D8-A1JJ-01A-31R-A14M-07	0	274	exoB	6.24484	High_Score
TCGA-A7-A4SB-01A-21R-A266-07	0	200	exoA	4.95446	Low_Score
TCGA-A7-A13H-01A-11R-A22K-07	0	551	exoB	4.6486	Low_Score
TCGA-BH-A0AY-01A-21R-A00Z-07	0	777	exoB	5.36659	High_Score
TCGA-BH-A0DV-01A-21R-A12P-07	0	1374	exoB	4.32692	Low_Score
TCGA-A2-A0EP-01A-52R-A22U-07	0	3021	exoB	4.68641	Low_Score
TCGA-EW-A1PE-01A-11R-A144-07	0	107	exoB	4.90877	Low_Score
TCGA-LL-A73Z-01A-11R-A32P-07	0	137	exoB	5.23594	High_Score
TCGA-AR-A1AJ-01A-21R-A12P-07	0	1605	exoB	6.10797	High_Score
TCGA-AO-A0JB-01A-11R-A32Y-07	0	1150	exoB	2.61854	Low_Score
TCGA-E2-A15A-01A-11R-A12D-07	0	502	exoA	5.64565	High_Score
TCGA-AC-A5XS-01A-11R-A29R-07	0	47	exoB	4.94771	Low_Score
TCGA-AR-A24S-01A-11R-A169-07	0	1888	exoB	5.56187	High_Score
TCGA-A7-A26E-01A-11R-A169-07	0	421	exoB	6.11922	High_Score
TCGA-EW-A1P6-01A-11R-A144-07	0	312	exoA	5.58635	High_Score
TCGA-OL-A6VQ-01A-12R-A41B-07	0	229	exoB	4.20209	Low_Score
TCGA-E2-A1B5-01A-21R-A12P-07	0	774	exoB	5.66917	High_Score
TCGA-A2-A0CV-01A-31R-A115-07	0	1870	exoB	5.22218	High_Score
TCGA-E2-A10B-01A-11R-A10J-07	0	748	exoA	5.56274	High_Score
TCGA-A1-A0SH-01A-11R-A084-07	0	1437	exoB	4.58878	Low_Score
TCGA-A2-A04R-01A-41R-A109-07	0	2365	exoA	4.86187	Low_Score
TCGA-E2-A15M-01A-11R-A12D-07	0	235	exoB	5.42632	High_Score
TCGA-BH-A0DE-01A-11R-A115-07	0	948	exoB	5.1733	High_Score
TCGA-A2-A0EO-01A-11R-A034-07	0	2181	exoB	4.70153	Low_Score
TCGA-LL-A50Y-01A-11R-A266-07	0	210	exoA	3.87299	Low_Score
TCGA-GM-A2DL-01A-11R-A18M-07	0	2763	exoB	5.13771	High_Score
TCGA-E2-A15C-01A-31R-A12D-07	0	497	exoA	5.21463	High_Score
TCGA-BH-A0BT-01A-11R-A12P-07	0	1386	exoA	3.88881	Low_Score
TCGA-BH-A0HI-01A-11R-A084-07	0	620	exoA	4.6845	Low_Score
TCGA-A2-A0CZ-01A-11R-A034-07	0	1339	exoB	4.43342	Low_Score
TCGA-D8-A1X9-01A-12R-A157-07	0	380	exoA	4.86332	Low_Score
TCGA-AO-A12B-01A-11R-A10J-07	0	2359	exoA	5.09969	Low_Score
TCGA-AR-A1AM-01A-41R-A22K-07	0	1903	exoB	4.96977	Low_Score
TCGA-A2-A4S0-01A-21R-A266-07	0	271	exoA	4.8584	Low_Score
TCGA-AO-A126-01A-11R-A10J-07	0	2850	exoB	3.95807	Low_Score
TCGA-A8-A08F-01A-11R-A00Z-07	0	549	exoA	6.46113	High_Score
TCGA-PE-A5DE-01A-11R-A27Q-07	0	1855	exoB	4.77505	Low_Score
TCGA-BH-A0DG-01A-21R-A12P-07	0	713	exoB	5.01873	Low_Score
TCGA-BH-A0HW-01A-11R-A034-07	0	1561	exoA	5.63177	High_Score
TCGA-A1-A0SD-01A-11R-A115-07	0	437	exoB	4.96692	Low_Score
TCGA-AO-A03R-01A-21R-A034-07	0	1707	exoA	4.4859	Low_Score
TCGA-BH-A0BZ-01A-31R-A12P-07	0	1492	exoB	5.28414	High_Score
TCGA-AO-A125-01A-11R-A10J-07	0	3019	exoA	4.68334	Low_Score
TCGA-D8-A145-01A-11R-A115-07	0	49	exoB	5.54502	High_Score
TCGA-Z7-A8R6-01A-11R-A41B-07	0	2800	exoA	5.41495	High_Score
TCGA-BH-A0HA-01A-11R-A12P-07	0	856	exoB	3.92078	Low_Score
TCGA-AR-A251-01A-12R-A169-07	0	1374	exoB	6.10833	High_Score
TCGA-E2-A1IU-01A-11R-A14D-07	0	127	exoA	5.08621	Low_Score
TCGA-AN-A0XO-01A-11R-A109-07	0	375	exoB	5.55972	High_Score
TCGA-E2-A1IO-01A-11R-A144-07	0	498	exoB	5.62458	High_Score
TCGA-A7-A56D-01A-11R-A27Q-07	0	177	exoB	4.0007	Low_Score
TCGA-BH-A0DX-01A-11R-A115-07	0	1442	exoB	5.26519	High_Score
TCGA-A2-A4RX-01A-11R-A266-07	0	274	exoB	4.68843	Low_Score
TCGA-S3-AA0Z-01A-11R-A41B-07	0	322	exoB	5.07421	Low_Score
TCGA-AR-A24W-01A-11R-A169-07	0	1550	exoB	5.73645	High_Score
TCGA-A2-A04N-01A-11R-A115-07	0	3153	exoA	5.00638	Low_Score
TCGA-BH-A0BJ-01A-11R-A056-07	0	660	exoB	4.72456	Low_Score
TCGA-E2-A10C-01A-21R-A10J-07	0	854	exoA	6.21355	High_Score
TCGA-BH-A5IZ-01A-11R-A27Q-07	0	98	exoB	4.79136	Low_Score
TCGA-E2-A576-01A-11R-A31O-07	0	578	exoA	3.89993	Low_Score
TCGA-LD-A74U-01A-13R-A33J-07	0	203	exoB	4.85942	Low_Score
TCGA-E2-A570-01A-11R-A29R-07	0	549	exoB	5.11281	High_Score
TCGA-EW-A423-01A-11R-A24H-07	0	309	exoA	4.15805	Low_Score
TCGA-BH-A0H6-01A-21R-A056-07	0	747	exoA	5.10491	Low_Score
TCGA-AR-A24Z-01A-11R-A169-07	0	1574	exoA	5.86286	High_Score
TCGA-E2-A1IK-01A-11R-A144-07	0	519	exoA	5.53474	High_Score
TCGA-D8-A13Y-01A-11R-A115-07	0	264	exoA	6.0451	High_Score
TCGA-A2-A0YC-01A-11R-A109-07	0	644	exoA	5.44244	High_Score
TCGA-A2-A0CL-01A-11R-A115-07	0	1827	exoB	5.67291	High_Score
TCGA-D8-A1XM-01A-21R-A14M-07	0	218	exoB	5.34177	High_Score
TCGA-AO-A12A-01A-21R-A115-07	0	2755	exoB	4.99541	Low_Score
TCGA-E2-A1BC-01A-11R-A12P-07	0	297	exoB	5.25605	High_Score
TCGA-A2-A25F-01A-11R-A169-07	0	114	exoB	5.04516	Low_Score
TCGA-EW-A2FV-01A-11R-A17B-07	0	239	exoB	5.15414	High_Score
TCGA-AC-A3QP-01A-11R-A22U-07	0	286	exoB	4.63087	Low_Score
TCGA-LL-A7SZ-01A-32R-A352-07	0	170	exoB	4.52352	Low_Score
TCGA-BH-A0BO-01A-23R-A12D-07	0	1085	exoB	4.63823	Low_Score
TCGA-BH-A0HX-01A-21R-A056-07	0	829	exoA	5.66772	High_Score
TCGA-A1-A0SF-01A-11R-A144-07	0	1463	exoB	4.50489	Low_Score
TCGA-D8-A1JN-01A-11R-A13Q-07	0	217	exoB	6.43395	High_Score
TCGA-A8-A06Z-01A-11R-A00Z-07	0	31	exoA	6.2308	High_Score
TCGA-A2-A0YD-01A-11R-A109-07	0	550	exoB	4.36073	Low_Score
TCGA-AO-A03P-01A-11R-A00Z-07	0	2576	exoA	4.75026	Low_Score
TCGA-E2-A1LA-01A-11R-A144-07	0	463	exoA	4.23789	Low_Score
TCGA-D8-A141-01A-11R-A115-07	0	113	exoB	4.89047	Low_Score
TCGA-BH-A0HB-01A-11R-A056-07	0	806	exoA	5.40228	High_Score
TCGA-E2-A2P5-01A-11R-A19W-07	0	326	exoB	5.16893	High_Score
TCGA-AO-A0J9-01A-11R-A034-07	0	1256	exoB	4.72585	Low_Score
TCGA-AR-A1AK-01A-21R-A12P-07	0	1559	exoB	5.0403	Low_Score
TCGA-C8-A27A-01A-11R-A169-07	0	371	exoA	5.81849	High_Score
TCGA-BH-A0C3-01A-21R-A12P-07	0	1464	exoB	5.92926	High_Score
TCGA-E2-A1IG-01A-11R-A144-07	0	755	exoB	4.49831	Low_Score
TCGA-A2-A3KD-01A-12R-A213-07	0	804	exoA	5.11549	High_Score
TCGA-A2-A0YK-01A-22R-A109-07	0	334	exoB	5.15324	High_Score
TCGA-BH-A18J-01A-11R-A12D-07	1	612	exoA	5.36719	High_Score
TCGA-AR-A24M-01A-11R-A169-07	0	1991	exoB	4.55395	Low_Score
TCGA-A8-A093-01A-11R-A00Z-07	0	546	exoA	5.27771	High_Score
TCGA-AC-A6NO-01A-12R-A33J-07	0	51	exoA	5.19636	High_Score
TCGA-A8-A09M-01A-11R-A00Z-07	0	457	exoA	6.18194	High_Score
TCGA-AR-A1AP-01A-11R-A12P-07	0	1216	exoB	6.18336	High_Score
TCGA-A8-A09R-01A-11R-A00Z-07	0	273	exoA	6.00901	High_Score
TCGA-GM-A5PX-01A-12R-A28M-07	0	551	exoB	4.26522	Low_Score
TCGA-E2-A1BD-01A-11R-A12P-07	0	317	exoA	4.76118	Low_Score
TCGA-AC-A62Y-01A-11R-A29R-07	0	55	exoB	5.25972	High_Score
TCGA-AC-A2FO-01A-11R-A180-07	0	1542	exoB	5.01406	Low_Score
TCGA-AR-A2LN-01A-21R-A18M-07	0	520	exoB	4.54842	Low_Score
TCGA-OL-A66O-01A-11R-A31O-07	0	220	exoA	3.41686	Low_Score
TCGA-BH-A0HU-01A-11R-A034-07	0	392	exoA	5.44626	High_Score
TCGA-AR-A1AH-01A-11R-A12D-07	0	2298	exoB	4.96056	Low_Score
TCGA-A2-A04Y-01A-21R-A034-07	0	764	exoB	4.91589	Low_Score
TCGA-A8-A07L-01A-11R-A00Z-07	0	518	exoA	5.76496	High_Score
TCGA-AR-A0TY-01A-12R-A115-07	1	1699	exoA	5.76034	High_Score
TCGA-A2-A0CW-01A-21R-A115-07	0	1750	exoA	5.42045	High_Score
TCGA-E2-A14O-01A-31R-A115-07	0	1173	exoA	3.59848	Low_Score
TCGA-A2-A0CQ-01A-21R-A034-07	0	2393	exoA	4.82514	Low_Score
TCGA-A8-A08Z-01A-21R-A00Z-07	0	1217	exoB	5.21475	High_Score
TCGA-EW-A2FW-01A-11R-A17B-07	0	191	exoA	4.92665	Low_Score
TCGA-AR-A2LL-01A-11R-A180-07	0	224	exoA	4.92178	Low_Score
TCGA-AR-A24Q-01A-12R-A169-07	0	2009	exoB	5.48077	High_Score
TCGA-AO-A0J3-01A-11R-A034-07	0	302	exoA	5.56414	High_Score
TCGA-AR-A2LK-01A-11R-A180-07	0	1304	exoA	5.69272	High_Score
TCGA-A8-A08J-01A-11R-A00Z-07	1	1127	exoA	6.51135	High_Score
TCGA-A2-A0YF-01A-21R-A109-07	0	289	exoA	5.01869	Low_Score
TCGA-BH-A0AZ-01A-21R-A12P-07	0	867	exoB	4.44394	Low_Score
TCGA-D8-A1Y0-01A-11R-A14M-07	0	167	exoA	5.24076	High_Score
TCGA-OL-A5RU-01A-11R-A28M-07	0	841	exoB	4.34823	Low_Score
TCGA-D8-A1XZ-01A-11R-A14M-07	0	121	exoB	6.27107	High_Score
TCGA-B6-A40C-01A-11R-A239-07	0	1673	exoB	4.94267	Low_Score
TCGA-AC-A8OR-01A-21R-A41B-07	0	40	exoA	4.16567	Low_Score
TCGA-S3-A6ZH-01A-22R-A32P-07	0	263	exoA	4.85839	Low_Score
TCGA-E2-A14Z-01A-11R-A115-07	0	518	exoB	5.25262	High_Score
TCGA-E2-A1IF-01A-11R-A144-07	0	956	exoB	4.91291	Low_Score
TCGA-D8-A27G-01A-11R-A16F-07	0	210	exoB	4.97671	Low_Score
TCGA-AO-A1KQ-01A-11R-A13Q-07	0	1519	exoA	5.18556	High_Score
TCGA-D8-A1JU-01A-11R-A13Q-07	0	106	exoB	5.23511	High_Score
TCGA-BH-A0DL-01A-11R-A115-07	0	1467	exoB	5.75646	High_Score
TCGA-E2-A56Z-01A-12R-A29R-07	0	219	exoA	6.43557	High_Score
TCGA-A7-A0D9-01A-31R-A056-07	0	160	exoA	5.92943	High_Score
TCGA-A2-A259-01A-11R-A16F-07	0	1286	exoA	6.10091	High_Score
TCGA-A2-A0YJ-01A-11R-A109-07	0	326	exoB	5.78504	High_Score
TCGA-D8-A1XD-01A-11R-A14D-07	0	155	exoA	5.11869	High_Score
TCGA-A2-A0T7-01A-21R-A084-07	0	397	exoB	5.43008	High_Score
TCGA-AC-A2FG-01A-11R-A17B-07	0	1125	exoB	5.28305	High_Score
TCGA-BH-AB28-01A-31R-A41B-07	0	185	exoB	4.72932	Low_Score
TCGA-D8-A1JP-01A-11R-A13Q-07	0	167	exoB	5.55805	High_Score
TCGA-S3-A6ZF-01A-32R-A32P-07	0	212	exoA	5.58452	High_Score
TCGA-A2-A0YI-01A-31R-A10J-07	0	358	exoA	4.82028	Low_Score
TCGA-A7-A0DB-01A-11R-A277-07	0	141	exoA	4.85696	Low_Score
TCGA-EW-A1OX-01A-11R-A144-07	0	562	exoA	5.18608	High_Score
TCGA-BH-A1ES-01A-11R-A137-07	1	3462	exoA	5.28898	High_Score
TCGA-EW-A1P5-01A-11R-A144-07	0	365	exoA	5.75942	High_Score
TCGA-GM-A2DN-01A-11R-A180-07	0	2352	exoB	5.21574	High_Score
TCGA-EW-A1J2-01A-21R-A13Q-07	0	140	exoB	4.91221	Low_Score
TCGA-BH-A0DH-01A-11R-A084-07	0	1156	exoA	5.28578	High_Score
TCGA-D8-A1JD-01A-11R-A13Q-07	0	273	exoB	6.22263	High_Score
TCGA-A2-A0EV-01A-11R-A034-07	0	545	exoB	5.36904	High_Score
TCGA-BH-A0EI-01A-11R-A115-07	0	743	exoA	4.50141	Low_Score
TCGA-AN-A0XW-01A-11R-A109-07	0	170	exoB	5.15584	High_Score
TCGA-A8-A09A-01A-11R-A00Z-07	0	304	exoB	5.49504	High_Score
TCGA-A1-A0SG-01A-11R-A144-07	0	434	exoA	4.83069	Low_Score
TCGA-AQ-A1H3-01A-31R-A13Q-07	0	162	exoB	5.4743	High_Score
TCGA-BH-A0E7-01A-11R-A034-07	0	1363	exoA	5.43597	High_Score
TCGA-AR-A24L-01A-11R-A169-07	0	2221	exoA	5.86941	High_Score
TCGA-E2-A1IJ-01A-11R-A144-07	0	725	exoB	4.54955	Low_Score
TCGA-A8-A09D-01A-11R-A00Z-07	0	396	exoB	5.31653	High_Score
TCGA-D8-A1JH-01A-11R-A13Q-07	0	284	exoB	5.18724	High_Score
TCGA-GM-A3NW-01A-21R-A22K-07	0	2982	exoA	4.84721	Low_Score
TCGA-A7-A0CD-01A-11R-A00Z-07	0	171	exoA	4.33559	Low_Score
TCGA-AO-A03L-01A-41R-A056-07	0	2442	exoB	4.68794	Low_Score
TCGA-E2-A14T-01A-11R-A115-07	0	890	exoA	6.17419	High_Score
TCGA-BH-A28Q-01A-11R-A16F-07	0	196	exoA	4.94347	Low_Score
TCGA-E2-A108-01A-13R-A10J-07	0	124	exoB	6.01153	High_Score
TCGA-A2-A0D4-01A-11R-A00Z-07	0	496	exoA	6.39712	High_Score
TCGA-V7-A7HQ-01A-11R-A33J-07	0	1590	exoB	3.05096	Low_Score
TCGA-AR-A24X-01A-11R-A169-07	0	1465	exoB	4.84369	Low_Score
TCGA-D8-A73X-01A-11R-A32P-07	0	368	exoB	4.77513	Low_Score
TCGA-BH-A0W4-01A-11R-A109-07	0	175	exoB	4.87898	Low_Score
TCGA-BH-A1ET-01A-11R-A137-07	1	2520	exoA	5.4046	High_Score
TCGA-LD-A7W5-01A-22R-A352-07	0	124	exoB	4.51845	Low_Score
TCGA-A2-A0T4-01A-31R-A084-07	0	395	exoB	4.68013	Low_Score
TCGA-A2-A0D3-01A-11R-A115-07	0	736	exoA	5.17401	High_Score
TCGA-AR-A24R-01A-11R-A169-07	0	1746	exoA	5.26221	High_Score
TCGA-BH-A2L8-01A-11R-A18M-07	0	168	exoB	4.76718	Low_Score
TCGA-A8-A06O-01A-11R-A00Z-07	0	396	exoA	5.66416	High_Score
TCGA-EW-A1P3-01A-11R-A144-07	0	987	exoB	4.91202	Low_Score
TCGA-D8-A1Y3-01A-11R-A157-07	0	125	exoA	5.3257	High_Score
TCGA-B6-A40B-01A-11R-A239-07	0	2521	exoB	3.80421	Low_Score
TCGA-B6-A1KI-01A-11R-A14M-07	0	1463	exoB	5.08533	Low_Score
TCGA-E2-A1L6-01A-11R-A13Q-07	0	1312	exoA	5.31134	High_Score
TCGA-BH-A18L-01A-32R-A12D-07	1	811	exoA	6.86384	High_Score
TCGA-D8-A146-01A-31R-A115-07	0	344	exoB	5.32544	High_Score
TCGA-3C-AAAU-01A-11R-A41B-07	0	3767	exoA	5.02123	Low_Score
TCGA-E2-A15J-01A-11R-A12P-07	0	464	exoA	5.23757	High_Score
TCGA-A8-A07Z-01A-11R-A00Z-07	0	853	exoA	5.28137	High_Score
TCGA-BH-A0BF-01A-21R-A12P-07	0	782	exoB	4.48635	Low_Score
TCGA-E2-A154-01A-11R-A115-07	0	325	exoA	5.09852	Low_Score
TCGA-A8-A085-01A-11R-A00Z-07	0	1124	exoA	5.57915	High_Score
TCGA-EW-A1J1-01A-11R-A13Q-07	0	282	exoA	4.92598	Low_Score
TCGA-A8-A084-01A-21R-A00Z-07	0	458	exoB	5.05259	Low_Score
TCGA-AO-A0JA-01A-11R-A056-07	0	346	exoB	4.38095	Low_Score
TCGA-A2-A1G4-01A-11R-A13Q-07	0	372	exoA	5.29845	High_Score
TCGA-A2-A0CK-01A-11R-A22K-07	0	3820	exoA	4.58977	Low_Score
TCGA-BH-A0B0-01A-21R-A115-07	0	1428	exoB	4.71163	Low_Score
TCGA-BH-A1EY-01A-11R-A13Q-07	1	538	exoB	5.96495	High_Score
TCGA-A7-A425-01A-11R-A24H-07	0	293	exoB	4.95885	Low_Score
TCGA-A8-A06Y-01A-21R-A00Z-07	0	791	exoA	4.80282	Low_Score
TCGA-EW-A1PA-01A-11R-A144-07	0	267	exoA	5.14069	High_Score
TCGA-A2-A1FV-01A-11R-A13Q-07	0	461	exoA	5.57932	High_Score
TCGA-BH-A0AU-01A-11R-A12P-07	0	746	exoA	5.41075	High_Score
TCGA-D8-A1JC-01A-11R-A13Q-07	0	178	exoB	6.43991	High_Score
TCGA-E2-A1B4-01A-11R-A12P-07	0	911	exoA	4.15508	Low_Score
TCGA-A2-A0EW-01A-21R-A115-07	0	770	exoB	5.2871	High_Score
TCGA-AR-A1AL-01A-21R-A12P-07	0	1485	exoB	5.39738	High_Score
TCGA-LD-A7W6-01A-81R-A352-07	0	140	exoA	4.76968	Low_Score
TCGA-A2-A1FX-01A-11R-A13Q-07	0	935	exoA	5.19266	High_Score
TCGA-A2-A0EX-01A-21R-A034-07	0	550	exoB	4.66163	Low_Score
TCGA-AR-A2LQ-01A-22R-A18M-07	0	516	exoB	4.79088	Low_Score
TCGA-W8-A86G-01A-21R-A36F-07	0	161	exoB	4.45878	Low_Score
TCGA-BH-A0HO-01A-11R-A034-07	0	76	exoB	5.58199	High_Score
TCGA-A8-A091-01A-11R-A00Z-07	0	580	exoA	5.71887	High_Score
TCGA-AR-A0U2-01A-11R-A109-07	1	2551	exoA	7.76039	High_Score
TCGA-BH-A0W7-01A-11R-A115-07	0	558	exoB	5.19748	High_Score
TCGA-A2-A0ER-01A-21R-A034-07	0	1903	exoA	4.99127	Low_Score
TCGA-E9-A6HE-01A-11R-A31O-07	0	92	exoB	3.92488	Low_Score
TCGA-A7-A5ZX-01A-12R-A29R-07	0	132	exoB	4.40275	Low_Score
TCGA-BH-A201-01A-11R-A14M-07	0	210	exoB	4.76299	Low_Score
TCGA-D8-A73W-01A-22R-A352-07	0	244	exoB	5.09548	Low_Score
TCGA-A7-A3IY-01A-21R-A21T-07	0	151	exoB	4.43801	Low_Score
TCGA-OL-A6VR-01A-32R-A33J-07	0	848	exoA	4.4792	Low_Score
TCGA-BH-A0HP-01A-12R-A084-07	0	414	exoB	5.5006	High_Score
TCGA-AR-A0TP-01A-11R-A084-07	0	2521	exoB	5.78494	High_Score
TCGA-AR-A0TZ-01A-12R-A084-07	0	2316	exoA	4.51405	Low_Score
TCGA-EW-A1OY-01A-11R-A144-07	0	593	exoA	5.05401	Low_Score
TCGA-GM-A2DC-01A-11R-A18M-07	0	1628	exoA	5.27329	High_Score
TCGA-BH-A18N-01A-11R-A12D-07	1	468	exoA	5.23097	High_Score
TCGA-D8-A1XR-01A-11R-A14M-07	0	168	exoA	5.83475	High_Score
TCGA-A2-A0ES-01A-11R-A115-07	0	1001	exoB	5.01621	Low_Score
TCGA-A7-A3J1-01A-11R-A213-07	0	75	exoB	5.03752	Low_Score
TCGA-AC-A5EH-01A-11R-A28M-07	0	63	exoB	5.38583	High_Score
TCGA-E2-A15O-01A-11R-A115-07	0	289	exoA	5.47077	High_Score
TCGA-BH-A0BM-01A-11R-A056-07	0	1117	exoB	4.45631	Low_Score
TCGA-EW-A1IY-01A-11R-A13Q-07	0	258	exoB	6.04636	High_Score
TCGA-AR-A24K-01A-11R-A169-07	0	1548	exoA	5.59017	High_Score
TCGA-S3-AA11-01A-31R-A41B-07	0	169	exoA	4.83073	Low_Score
TCGA-EW-A6SA-01A-21R-A32P-07	0	510	exoA	5.65412	High_Score
TCGA-A2-A0CP-01A-11R-A034-07	0	2495	exoB	4.61857	Low_Score
TCGA-EW-A1IZ-01A-11R-A13Q-07	0	260	exoB	4.50319	Low_Score
TCGA-A7-A13F-01A-11R-A12P-07	0	196	exoA	4.06547	Low_Score
TCGA-D8-A1JT-01A-31R-A13Q-07	0	123	exoA	5.76781	High_Score
TCGA-D8-A1JM-01A-11R-A13Q-07	0	238	exoB	6.17606	High_Score
TCGA-BH-A0EA-01A-11R-A115-07	1	991	exoA	5.45266	High_Score
TCGA-BH-A0BA-01A-11R-A056-07	0	1132	exoB	5.81986	High_Score
TCGA-EW-A6SC-01A-12R-A32P-07	0	952	exoB	4.77316	Low_Score
TCGA-OL-A5DA-01A-11R-A27Q-07	0	1357	exoA	4.22431	Low_Score
TCGA-AO-A0JC-01A-11R-A056-07	0	1547	exoB	4.72013	Low_Score
TCGA-EW-A2FS-01A-11R-A17B-07	0	1173	exoB	5.40501	High_Score
TCGA-A8-A09K-01A-11R-A00Z-07	0	912	exoA	6.05997	High_Score
TCGA-E2-A107-01A-11R-A10J-07	0	763	exoA	5.21811	High_Score
TCGA-E2-A14Q-01A-11R-A12D-07	0	974	exoA	5.35608	High_Score
TCGA-A8-A06Q-01A-11R-A034-07	0	31	exoA	6.1257	High_Score
TCGA-GM-A2DK-01A-21R-A180-07	0	1896	exoA	6.12909	High_Score
TCGA-5L-AAT0-01A-12R-A41B-07	0	1477	exoB	4.32828	Low_Score
TCGA-A7-A4SC-01A-12R-A266-07	0	215	exoB	4.67751	Low_Score
TCGA-A2-A0CR-01A-11R-A22K-07	0	2955	exoB	3.79459	Low_Score
TCGA-GM-A2DM-01A-11R-A180-07	0	2331	exoA	5.44058	High_Score
TCGA-D8-A1XF-01A-11R-A14D-07	0	97	exoA	5.57459	High_Score
TCGA-BH-A0HN-01A-11R-A10U-07	0	516	exoA	4.75535	Low_Score
TCGA-AO-A03T-01A-21R-A034-07	0	1187	exoA	5.1379	High_Score
TCGA-BH-A0DK-01A-21R-A056-07	0	423	exoB	4.81766	Low_Score
TCGA-E2-A15R-01A-11R-A115-07	0	330	exoA	4.82733	Low_Score
TCGA-D8-A1Y1-01A-21R-A14M-07	0	116	exoB	4.54308	Low_Score
TCGA-A2-A0T6-01A-11R-A084-07	0	344	exoB	4.30658	Low_Score
TCGA-E2-A10F-01A-11R-A10J-07	0	360	exoB	5.03592	Low_Score
TCGA-A8-A09C-01A-11R-A00Z-07	0	31	exoA	5.20517	High_Score
TCGA-D8-A73U-01A-11R-A33J-07	0	492	exoB	4.66296	Low_Score
TCGA-A8-A07E-01A-11R-A034-07	0	608	exoB	5.53833	High_Score
TCGA-AO-A0JF-01A-11R-A056-07	0	354	exoB	5.07342	Low_Score
TCGA-E2-A153-01A-12R-A12D-07	0	586	exoB	4.16919	Low_Score
TCGA-BH-A0B5-01A-11R-A12P-07	0	1471	exoB	4.8859	Low_Score
TCGA-A8-A07W-01A-11R-A00Z-07	0	304	exoA	6.08013	High_Score
TCGA-BH-A0B8-01A-21R-A056-07	0	1569	exoA	5.02544	Low_Score
TCGA-BH-A0B1-01A-12R-A056-07	0	1148	exoA	5.72807	High_Score
TCGA-BH-A18F-01A-11R-A12D-07	0	268	exoB	5.54015	High_Score
TCGA-BH-A0H9-01A-11R-A056-07	0	1247	exoA	6.54543	High_Score
TCGA-A8-A07U-01A-11R-A034-07	0	303	exoB	5.77525	High_Score
TCGA-AO-A12E-01A-11R-A10J-07	0	1743	exoA	4.88292	Low_Score
TCGA-AC-A2BM-01A-11R-A21T-07	0	1162	exoA	5.63017	High_Score
TCGA-A7-A426-01A-22R-A24H-07	0	229	exoB	4.54378	Low_Score
TCGA-BH-A6R8-01A-21R-A33J-07	0	293	exoA	5.3057	High_Score
TCGA-A8-A0A6-01A-12R-A056-07	0	640	exoB	5.3841	High_Score
TCGA-AO-A0J5-01A-11R-A034-07	0	735	exoB	4.66882	Low_Score
TCGA-AO-A12H-01A-11R-A115-07	0	863	exoA	4.81004	Low_Score
TCGA-E2-A15G-01A-11R-A12D-07	0	316	exoA	5.3182	High_Score
TCGA-GM-A5PV-01A-11R-A28M-07	0	412	exoA	4.48458	Low_Score
TCGA-AR-A2LM-01A-11R-A180-07	0	1218	exoB	4.65108	Low_Score
TCGA-E2-A1II-01A-11R-A144-07	0	850	exoB	5.77409	High_Score
TCGA-A2-A4S2-01A-12R-A266-07	0	205	exoA	5.1765	High_Score
TCGA-BH-A6R9-01A-21R-A32P-07	0	160	exoB	3.9202	Low_Score
TCGA-AC-A2FK-01A-12R-A180-07	0	1180	exoB	4.97447	Low_Score
TCGA-A8-A07S-01A-11R-A034-07	0	243	exoA	5.68809	High_Score
TCGA-E2-A106-01A-11R-A10J-07	0	1555	exoA	5.53094	High_Score
TCGA-AO-A03V-01A-11R-A115-07	0	886	exoA	5.70749	High_Score
TCGA-BH-A8FY-01A-11R-A36F-07	1	295	exoA	4.50563	Low_Score
TCGA-AC-A3W7-01A-11R-A22K-07	0	192	exoB	4.78146	Low_Score
TCGA-AO-A12G-01A-11R-A10J-07	0	1266	exoB	5.14548	High_Score
TCGA-E2-A15L-01A-11R-A12D-07	0	331	exoA	4.70387	Low_Score
TCGA-AN-A0FF-01A-11R-A034-07	0	172	exoA	4.78915	Low_Score
TCGA-BH-A0E1-01A-11R-A056-07	0	477	exoA	5.07148	Low_Score
TCGA-BH-A0HF-01A-11R-A056-07	0	727	exoB	5.2675	High_Score
TCGA-AR-A1AW-01A-21R-A12P-07	0	1072	exoB	5.15886	High_Score
TCGA-OK-A5Q2-01A-11R-A27Q-07	0	64	exoB	5.1042	Low_Score
TCGA-AR-A0TW-01A-11R-A084-07	0	739	exoA	6.61818	High_Score
TCGA-BH-A1EU-01A-11R-A137-07	1	1286	exoA	5.31701	High_Score
TCGA-BH-A42V-01A-11R-A24H-07	0	272	exoB	4.52121	Low_Score
TCGA-A2-A0YL-01A-21R-A109-07	0	268	exoB	4.99749	Low_Score
TCGA-A7-A0CJ-01A-21R-A00Z-07	0	189	exoA	3.78516	Low_Score
TCGA-A2-A3Y0-01A-11R-A239-07	0	859	exoB	4.53635	Low_Score
TCGA-BH-A0DQ-01A-11R-A084-07	0	98	exoB	4.96606	Low_Score
TCGA-A8-A07J-01A-11R-A00Z-07	0	365	exoB	5.33835	High_Score
TCGA-BH-A18K-01A-11R-A12D-07	1	2763	exoB	5.21398	High_Score
TCGA-A2-A0EU-01A-22R-A056-07	0	733	exoA	6.11018	High_Score
TCGA-AO-A0JJ-01A-11R-A056-07	0	1512	exoB	4.55168	Low_Score
TCGA-A8-A092-01A-11R-A00Z-07	0	487	exoA	5.83794	High_Score
TCGA-S3-AA12-01A-11R-A41B-07	0	259	exoA	5.87801	High_Score
TCGA-BH-A1EO-01A-11R-A137-07	1	2798	exoB	4.947	Low_Score
TCGA-A2-A4RW-01A-21R-A266-07	0	222	exoA	4.38007	Low_Score
TCGA-A2-A0CY-01A-12R-A034-07	0	1288	exoB	4.65026	Low_Score
TCGA-A7-A5ZW-01A-12R-A29R-07	0	134	exoB	4.85493	Low_Score
TCGA-E2-A1IN-01A-11R-A13Q-07	0	392	exoB	4.61524	Low_Score
TCGA-AO-A0J7-01A-11R-A034-07	0	261	exoA	4.55531	Low_Score
TCGA-A2-A3KC-01A-11R-A213-07	0	363	exoB	4.13595	Low_Score
TCGA-E2-A15D-01A-11R-A115-07	0	316	exoB	5.54377	High_Score
TCGA-AO-A03O-01A-11R-A00Z-07	1	2483	exoA	6.09641	High_Score
TCGA-OL-A66N-01A-12R-A31O-07	0	413	exoB	3.91901	Low_Score
TCGA-E2-A572-01A-13R-A31O-07	0	831	exoA	3.19001	Low_Score
TCGA-EW-A1PG-01A-11R-A144-07	0	876	exoB	4.78484	Low_Score
TCGA-D8-A1X7-01A-11R-A14M-07	0	85	exoB	5.56189	High_Score
TCGA-A8-A08O-01A-21R-A056-07	0	943	exoA	5.73177	High_Score
TCGA-E2-A15I-01A-21R-A137-07	0	411	exoB	5.67948	High_Score
TCGA-BH-A0HQ-01A-11R-A034-07	0	1121	exoB	5.05692	Low_Score
TCGA-AR-A24V-01A-21R-A169-07	0	1648	exoB	4.39702	Low_Score
TCGA-A2-A4S3-01A-21R-A266-07	0	104	exoB	5.53009	High_Score
TCGA-AO-A1KO-01A-31R-A13Q-07	0	448	exoB	4.61042	Low_Score
TCGA-AR-A1AV-01A-21R-A12P-07	0	1295	exoA	5.27398	High_Score
TCGA-A8-A0A2-01A-11R-A034-07	0	579	exoA	4.64517	Low_Score
TCGA-LQ-A4E4-01A-11R-A266-07	0	484	exoA	5.66601	High_Score
TCGA-A1-A0SI-01A-11R-A144-07	0	635	exoB	5.0976	Low_Score
TCGA-BH-A5J0-01A-11R-A27Q-07	0	225	exoB	4.4923	Low_Score
TCGA-D8-A1Y2-01A-11R-A157-07	0	73	exoB	4.7984	Low_Score
TCGA-A7-A3RF-01A-11R-A22K-07	0	54	exoA	5.35942	High_Score
TCGA-A2-A0T5-01A-21R-A084-07	0	321	exoB	4.77026	Low_Score
TCGA-BH-A1F5-01A-12R-A13Q-07	1	2712	exoA	6.15069	High_Score
TCGA-LD-A66U-01A-11R-A31O-07	0	252	exoB	3.70034	Low_Score
TCGA-A8-A0A4-01A-11R-A00Z-07	0	396	exoB	5.04068	Low_Score
TCGA-EW-A1J6-01A-11R-A13Q-07	0	595	exoA	5.23609	High_Score
TCGA-BH-A0BV-01A-11R-A00Z-07	0	1519	exoA	4.6	Low_Score
TCGA-D8-A27T-01A-11R-A16F-07	0	136	exoB	4.28017	Low_Score
TCGA-A2-A0T3-01A-21R-A115-07	0	456	exoA	4.39982	Low_Score
TCGA-E2-A15P-01A-11R-A115-07	0	315	exoA	5.37201	High_Score
TCGA-BH-A1FB-01A-11R-A13Q-07	1	3669	exoA	5.25119	High_Score
TCGA-A2-A0CO-01A-13R-A22K-07	0	1468	exoB	4.85089	Low_Score
TCGA-A8-A0A9-01A-11R-A00Z-07	0	396	exoA	5.13565	High_Score
TCGA-AQ-A54O-01A-11R-A266-07	0	665	exoA	4.58065	Low_Score
TCGA-S3-AA17-01A-11R-A41B-07	0	119	exoA	4.6383	Low_Score
TCGA-MS-A51U-01A-31R-A266-07	0	85	exoB	4.45005	Low_Score
TCGA-GI-A2C8-01A-11R-A16F-07	0	225	exoB	5.60336	High_Score
TCGA-BH-A18S-01A-11R-A12D-07	1	2009	exoA	4.51842	Low_Score
TCGA-A8-A095-01A-11R-A00Z-07	0	1277	exoB	5.3807	High_Score
TCGA-EW-A1P0-01A-11R-A144-07	0	1121	exoA	5.25388	High_Score
TCGA-A2-A4S1-01A-21R-A266-07	0	365	exoB	4.50215	Low_Score
TCGA-AR-A0U3-01A-11R-A109-07	0	2317	exoA	6.12232	High_Score
TCGA-BH-A0EB-01A-11R-A034-07	0	745	exoB	5.36717	High_Score
TCGA-D8-A1XU-01A-11R-A14M-07	0	150	exoB	5.35319	High_Score
TCGA-OL-A66J-01A-11R-A29R-07	0	1658	exoB	4.79703	Low_Score
TCGA-BH-A0BC-01A-22R-A084-07	0	974	exoB	5.0812	Low_Score
TCGA-D8-A1XC-01A-11R-A14D-07	0	81	exoA	5.65567	High_Score
TCGA-AN-A0XV-01A-11R-A109-07	0	162	exoB	4.88971	Low_Score
TCGA-A2-A1FW-01A-11R-A13Q-07	0	221	exoA	7.11362	High_Score
TCGA-XX-A899-01A-11R-A36F-07	0	292	exoB	5.07004	Low_Score
TCGA-AO-A0JI-01A-21R-A056-07	0	1172	exoA	5.08912	Low_Score
TCGA-A7-A6VX-01A-12R-A33J-07	0	169	exoB	6.18986	High_Score
TCGA-A2-A0CS-01A-11R-A115-07	0	2298	exoA	4.36782	Low_Score
TCGA-E2-A15K-01A-11R-A12P-07	0	34	exoB	5.6085	High_Score
TCGA-XX-A89A-01A-11R-A36F-07	0	278	exoB	4.91614	Low_Score
TCGA-BH-A28O-01A-11R-A22K-07	0	324	exoB	4.36627	Low_Score
TCGA-B6-A401-01A-11R-A239-07	0	1989	exoB	4.66826	Low_Score
TCGA-A7-A0CG-01A-12R-A056-07	0	167	exoB	5.27959	High_Score
TCGA-AR-A24T-01A-11R-A169-07	0	1620	exoB	4.6042	Low_Score
TCGA-BH-A0H0-01A-11R-A056-07	0	461	exoA	5.42315	High_Score
TCGA-A8-A09T-01A-11R-A00Z-07	0	579	exoA	4.98009	Low_Score
TCGA-OL-A66L-01A-12R-A31O-07	0	945	exoB	3.49197	Low_Score
TCGA-A7-A4SA-01A-11R-A266-07	0	241	exoB	5.274	High_Score
TCGA-A2-A0EN-01A-13R-A084-07	0	4088	exoB	4.49634	Low_Score
TCGA-D8-A27E-01A-11R-A16F-07	0	182	exoA	5.5734	High_Score
TCGA-BH-A8G0-01A-11R-A352-07	0	199	exoB	4.57101	Low_Score
TCGA-A2-A3XW-01A-11R-A239-07	0	1209	exoB	4.68534	Low_Score
TCGA-BH-A0DP-01A-21R-A056-07	0	476	exoB	5.16397	High_Score
TCGA-OL-A66K-01A-11R-A29R-07	0	1021	exoA	4.8549	Low_Score
TCGA-BH-A1FG-01A-11R-A13Q-07	1	577	exoA	5.49466	High_Score
TCGA-A2-A0SW-01A-11R-A084-07	1	1365	exoA	5.78852	High_Score
TCGA-D8-A1XW-01A-11R-A14M-07	0	118	exoB	6.41648	High_Score
TCGA-GM-A2DO-01A-11R-A18M-07	0	1623	exoA	4.3542	Low_Score
TCGA-AO-A0JG-01A-31R-A084-07	0	449	exoB	4.86317	Low_Score
TCGA-E2-A1L9-01A-11R-A13Q-07	0	388	exoB	5.17969	High_Score
TCGA-GM-A3NY-01A-11R-A21T-07	0	743	exoA	4.49593	Low_Score
TCGA-OL-A66H-01A-11R-A29R-07	0	413	exoA	5.10875	Low_Score
TCGA-E2-A156-01A-11R-A12D-07	0	481	exoA	5.53793	High_Score
TCGA-D8-A1X6-01A-11R-A14M-07	0	236	exoA	5.86432	High_Score
TCGA-A8-A0AD-01A-11R-A056-07	0	1157	exoA	5.35574	High_Score
TCGA-A8-A07G-01A-11R-A034-07	0	577	exoB	5.99411	High_Score
TCGA-Z7-A8R5-01A-42R-A41B-07	0	3042	exoB	3.90997	Low_Score
TCGA-E2-A155-01A-11R-A12D-07	0	553	exoA	5.49354	High_Score
TCGA-E2-A109-01A-11R-A10J-07	0	1172	exoA	5.56132	High_Score
TCGA-A2-A1G0-01A-11R-A13Q-07	0	380	exoA	5.16041	High_Score
TCGA-AR-A24O-01A-11R-A169-07	0	1998	exoB	4.83379	Low_Score
TCGA-OL-A5RV-01A-12R-A28M-07	0	733	exoB	4.82059	Low_Score
TCGA-AR-A24H-01A-11R-A169-07	0	3333	exoA	6.05249	High_Score
TCGA-D8-A1JE-01A-11R-A13Q-07	0	57	exoA	4.85179	Low_Score
TCGA-A8-A09Q-01A-11R-A00Z-07	0	761	exoB	4.73244	Low_Score
TCGA-A2-A4RY-01A-31R-A266-07	0	268	exoB	4.41419	Low_Score
TCGA-A2-A0YH-01A-11R-A109-07	0	379	exoA	5.84314	High_Score
TCGA-A1-A0SE-01A-11R-A084-07	0	1321	exoA	4.56225	Low_Score
TCGA-AR-A1AN-01A-11R-A12P-07	0	1330	exoB	5.66145	High_Score
TCGA-OL-A5RX-01A-11R-A28M-07	0	513	exoB	4.82656	Low_Score
TCGA-AR-A2LO-01A-31R-A18M-07	0	633	exoB	4.87102	Low_Score
TCGA-BH-A0BD-01A-11R-A034-07	0	554	exoB	5.19606	High_Score
TCGA-AR-A24N-01A-11R-A169-07	0	2074	exoB	5.92967	High_Score
TCGA-AR-A1AO-01A-11R-A12P-07	0	1325	exoB	5.57931	High_Score
TCGA-BH-A0W3-01A-11R-A109-07	0	180	exoA	5.60109	High_Score
TCGA-EW-A1PF-01A-11R-A144-07	0	140	exoB	5.26496	High_Score
TCGA-S3-A6ZG-01A-22R-A32P-07	0	207	exoA	5.65158	High_Score
TCGA-A2-A0YT-01A-11R-A109-07	1	723	exoA	7.36834	High_Score
TCGA-AQ-A7U7-01A-22R-A352-07	0	304	exoB	4.35812	Low_Score
TCGA-GM-A2D9-01A-11R-A18M-07	1	1812	exoB	4.5521	Low_Score
TCGA-AO-A1KP-01A-11R-A13Q-07	0	2513	exoA	5.13069	High_Score
TCGA-A8-A07F-01A-11R-A00Z-07	0	577	exoB	5.32042	High_Score
TCGA-GM-A3XG-01A-31R-A24H-07	0	982	exoB	4.17445	Low_Score
TCGA-AR-A0TV-01A-21R-A084-07	0	905	exoA	6.69203	High_Score
TCGA-A2-A1FZ-01A-51R-A14D-07	0	410	exoB	4.88684	Low_Score
TCGA-A2-A25C-01A-11R-A169-07	0	285	exoA	4.95808	Low_Score
TCGA-OL-A5D8-01A-11R-A27Q-07	0	229	exoA	5.53054	High_Score
TCGA-D8-A1XL-01A-11R-A14M-07	0	319	exoA	4.95979	Low_Score
TCGA-AR-A252-01A-11R-A169-07	0	1236	exoB	5.58918	High_Score
TCGA-A8-A086-01A-11R-A00Z-07	0	396	exoA	5.57172	High_Score
