# Supplementary material for: Tumor-derived exosomes RNA expression profiling identifies the prognosis, immune characteristics, and treatment in HR+/HER2-breast cancer
Source: Aging (Albany NY). 2023 Aug 29;15(16):8471–86. doi: 10.18632/aging.204986 (PMC10497011; doi:10.18632/aging.204986)
Supplement: Supplementary Table 5 [file aging-15-204986-s003.xlsx]

## Sheet: Table S5
Supplementary Table 5. Exosomes score (ES) and subgroups of HR+/HER2-breast cancer patients in GSE25066.
sample	OS	OS.Time	ES	ES_subgroup
GSM615096	1	856	18.6089	High_Score
GSM615097	0	2026	18.0155	Low_Score
GSM615100	1	577	18.3018	Low_Score
GSM615108	0	1678	19.0443	High_Score
GSM615114	0	1498	18.2194	Low_Score
GSM615117	1	42	19.1513	High_Score
GSM615120	0	1718	18.1441	Low_Score
GSM615121	0	1541	18.5018	High_Score
GSM615122	0	1395	17.9331	Low_Score
GSM615123	0	1571	19.127	High_Score
GSM615124	0	1519	18.7627	High_Score
GSM615125	0	1487	18.2439	Low_Score
GSM615126	0	1387	18.598	High_Score
GSM615127	0	1506	19.0401	High_Score
GSM615128	1	491	18.9253	High_Score
GSM615129	0	1078	18.9784	High_Score
GSM615130	0	1467	18.788	High_Score
GSM615131	0	1052	18.6497	High_Score
GSM615132	0	575	18.4505	High_Score
GSM615133	0	1320	18.1351	Low_Score
GSM615134	0	1349	18.5228	High_Score
GSM615137	0	899	17.983	Low_Score
GSM615138	0	1425	18.7544	High_Score
GSM615142	0	1075	18.4962	High_Score
GSM615143	0	1059	18.3872	High_Score
GSM615144	0	1190	17.872	Low_Score
GSM615147	0	1048	18.4125	High_Score
GSM615150	0	794	18.2402	Low_Score
GSM615153	0	975	18.547	High_Score
GSM615155	0	1165	18.967	High_Score
GSM615157	0	746	19.1938	High_Score
GSM615158	0	830	18.6655	High_Score
GSM615159	0	618	17.9245	Low_Score
GSM615162	0	915	18.3128	Low_Score
GSM615163	0	191	18.5529	High_Score
GSM615165	0	599	19.1003	High_Score
GSM615166	0	773	18.2204	Low_Score
GSM615168	0	497	18.3666	Low_Score
GSM615170	0	802	18.579	High_Score
GSM615172	0	944	18.3578	Low_Score
GSM615173	0	761	17.2596	Low_Score
GSM615174	0	904	19.0708	High_Score
GSM615176	0	895	18.2029	Low_Score
GSM615177	0	637	18.2087	Low_Score
GSM615178	0	707	19.0358	High_Score
GSM615179	0	2585	17.8725	Low_Score
GSM615180	0	2102	18.0003	Low_Score
GSM615183	0	2449	18.3346	Low_Score
GSM615184	0	2665	18.1704	Low_Score
GSM615186	0	2431	17.5903	Low_Score
GSM615187	0	2494	16.5047	Low_Score
GSM615189	1	418	19.7682	High_Score
GSM615191	0	2314	17.9196	Low_Score
GSM615192	0	2674	18.5742	High_Score
GSM615194	0	2379	18.7232	High_Score
GSM615196	0	2360	16.7592	Low_Score
GSM615198	0	2406	18.5625	High_Score
GSM615199	0	2385	18.0087	Low_Score
GSM615200	1	1260	19.4181	High_Score
GSM615201	0	2231	19.3014	High_Score
GSM615202	0	2355	17.9197	Low_Score
GSM615204	0	2304	18.662	High_Score
GSM615205	0	2212	18.3402	Low_Score
GSM615206	0	2128	18.9029	High_Score
GSM615207	0	2114	18.0367	Low_Score
GSM615208	0	2143	17.7534	Low_Score
GSM615214	0	2021	18.8546	High_Score
GSM615216	1	974	18.6067	High_Score
GSM615217	0	2060	17.2897	Low_Score
GSM615219	0	176	18.3213	Low_Score
GSM615220	0	1813	18.8111	High_Score
GSM615221	1	1227	18.806	High_Score
GSM615222	1	561	17.4306	Low_Score
GSM615226	0	1598	18.1048	Low_Score
GSM615227	0	1892	19.1197	High_Score
GSM615228	0	1672	17.8396	Low_Score
GSM615231	0	1653	17.9782	Low_Score
GSM615232	0	1419	17.9853	Low_Score
GSM615233	1	289	18.4178	High_Score
GSM615234	0	1587	18.5996	High_Score
GSM615235	0	1784	19.5575	High_Score
GSM615237	0	1670	18.4845	High_Score
GSM615239	0	1500	18.4959	High_Score
GSM615243	0	1569	17.2619	Low_Score
GSM615245	1	823	18.0167	Low_Score
GSM615246	0	1658	18.2054	Low_Score
GSM615247	0	1470	18.2315	Low_Score
GSM615248	0	1173	18.7067	High_Score
GSM615249	1	1371	18.0645	Low_Score
GSM615252	0	1531	16.8235	Low_Score
GSM615253	0	1481	18.9856	High_Score
GSM615254	0	1516	18.0408	Low_Score
GSM615256	0	1331	19.1565	High_Score
GSM615257	0	1292	18.3223	Low_Score
GSM615258	0	1266	17.8703	Low_Score
GSM615259	0	1378	18.6638	High_Score
GSM615260	1	639	17.9932	Low_Score
GSM615261	0	1085	19.1851	High_Score
GSM615262	0	1746	18.1028	Low_Score
GSM615266	0	1284	15.5415	Low_Score
GSM615268	0	1279	18.1428	Low_Score
GSM615269	0	1198	18.2177	Low_Score
GSM615272	0	1378	17.1321	Low_Score
GSM615273	0	833	17.2336	Low_Score
GSM615274	1	290	19.9695	High_Score
GSM615277	0	1309	16.0674	Low_Score
GSM615278	0	1186	17.6676	Low_Score
GSM615279	1	799	18.2323	Low_Score
GSM615281	0	908	19.3654	High_Score
GSM615282	0	1098	19.6588	High_Score
GSM615283	0	1163	19.1056	High_Score
GSM615285	0	1229	17.5938	Low_Score
GSM615286	0	1153	17.9145	Low_Score
GSM615289	0	1105	18.8185	High_Score
GSM615290	0	1150	19.684	High_Score
GSM615292	0	865	18.2666	Low_Score
GSM615294	0	1112	18.817	High_Score
GSM615296	0	768	18.8872	High_Score
GSM615298	0	1091	18.7915	High_Score
GSM615299	0	973	17.7122	Low_Score
GSM615302	0	676	18.1853	Low_Score
GSM615304	0	699	17.6118	Low_Score
GSM615305	1	967	18.5281	High_Score
GSM615306	1	664	18.8933	High_Score
GSM615308	0	1005	18.9291	High_Score
GSM615309	1	673	18.821	High_Score
GSM615310	0	853	18.1998	Low_Score
GSM615311	0	983	18.8087	High_Score
GSM615312	1	623	18.033	Low_Score
GSM615313	0	955	17.9132	Low_Score
GSM615314	0	826	17.9403	Low_Score
GSM615316	0	688	16.651	Low_Score
GSM615318	0	865	16.6123	Low_Score
GSM615326	0	905	18.7179	High_Score
GSM615328	0	860	17.7201	Low_Score
GSM615329	0	752	17.953	Low_Score
GSM615331	0	799	19.1961	High_Score
GSM615332	1	525	18.8102	High_Score
GSM615333	0	815	18.4286	High_Score
GSM615337	0	796	18.7178	High_Score
GSM615339	0	792	18.2848	Low_Score
GSM615340	0	764	17.3708	Low_Score
GSM615341	0	811	18.2128	Low_Score
GSM615343	0	673	18.9789	High_Score
GSM615349	0	852	17.9624	Low_Score
GSM615350	0	833	18.558	High_Score
GSM615351	0	873	17.6403	Low_Score
GSM615352	0	788	17.9187	Low_Score
GSM615353	0	610	18.8464	High_Score
GSM615355	0	734	18.7886	High_Score
GSM615358	0	393	19.0743	High_Score
GSM615360	0	722	18.5	High_Score
GSM615361	0	691	18.847	High_Score
GSM615362	0	716	17.6219	Low_Score
GSM615366	0	685	18.424	High_Score
GSM615367	0	554	19.4053	High_Score
GSM615370	0	488	18.6843	High_Score
GSM615373	0	376	17.8883	Low_Score
GSM615375	0	453	18.2272	Low_Score
GSM615377	0	627	17.6449	Low_Score
GSM615381	0	368	18.4744	High_Score
GSM615383	0	454	17.5385	Low_Score
GSM615386	0	321	17.1792	Low_Score
GSM615388	0	284	18.3341	Low_Score
GSM615389	0	419	18.4384	High_Score
GSM615391	0	434	18.1627	Low_Score
GSM615395	0	388	17.8001	Low_Score
GSM615398	1	70	18.6093	High_Score
GSM615399	0	384	19.7823	High_Score
GSM615400	0	1002	18.4391	High_Score
GSM615401	0	917	18.2709	Low_Score
GSM615402	0	862	18.114	Low_Score
GSM615404	0	802	18.9705	High_Score
GSM615631	1	1660	19.4263	High_Score
GSM615632	0	1878	18.5092	High_Score
GSM615633	0	1960	18.1567	Low_Score
GSM615634	0	1845	18.6025	High_Score
GSM615635	0	1817	18.1541	Low_Score
GSM615636	0	907	18.8616	High_Score
GSM615638	1	1275	16.7646	Low_Score
GSM615641	0	1629	18.7407	High_Score
GSM615642	0	1762	18.3186	Low_Score
GSM615645	0	1795	17.8537	Low_Score
GSM615646	0	1711	18.0857	Low_Score
GSM615648	0	1614	19.6373	High_Score
GSM615652	0	1623	18.0789	Low_Score
GSM615653	0	1655	16.63	Low_Score
GSM615654	1	1252	19.1949	High_Score
GSM615656	0	1309	18.0202	Low_Score
GSM615659	0	1613	17.5207	Low_Score
GSM615662	1	693	18.3635	Low_Score
GSM615663	0	1619	18.5221	High_Score
GSM615664	0	379	18.4624	High_Score
GSM615665	0	1636	18.3025	Low_Score
GSM615669	0	1631	18.8587	High_Score
GSM615670	0	1467	17.9904	Low_Score
GSM615673	1	50	18.9885	High_Score
GSM615675	0	1495	17.3582	Low_Score
GSM615676	0	1529	18.2088	Low_Score
GSM615678	0	1450	18.5168	High_Score
GSM615679	0	703	18.3909	High_Score
GSM615682	0	1349	17.8549	Low_Score
GSM615683	0	1456	17.8816	Low_Score
GSM615684	0	1504	17.8028	Low_Score
GSM615685	0	2686	19.1697	High_Score
GSM615686	1	489	17.2806	Low_Score
GSM615690	0	2338	15.5628	Low_Score
GSM615692	0	1512	17.5974	Low_Score
GSM615693	0	1725	18.9099	High_Score
GSM615698	0	2102	17.5174	Low_Score
GSM615700	0	2197	18.1649	Low_Score
GSM615701	0	1935	18.2456	Low_Score
GSM615702	0	2045	18.2845	Low_Score
GSM615703	0	1874	19.1104	High_Score
GSM615704	0	1995	15.2231	Low_Score
GSM615706	0	1700	19.0781	High_Score
GSM615708	0	1810	16.9718	Low_Score
GSM615709	0	1753	18.8706	High_Score
GSM615710	0	1483	18.0629	Low_Score
GSM615711	0	1516	17.9652	Low_Score
GSM615713	1	1128	17.2293	Low_Score
GSM615717	0	972	17.3188	Low_Score
GSM615718	0	671	17.6751	Low_Score
GSM615719	0	1133	18.5593	High_Score
GSM615720	0	947	18.9549	High_Score
GSM615721	0	1071	18.6461	High_Score
GSM615722	0	1101	19.1954	High_Score
GSM615723	0	1085	19.6889	High_Score
GSM615724	0	1041	18.6407	High_Score
GSM615725	0	1107	18.6333	High_Score
GSM615726	0	1079	18.8316	High_Score
GSM615728	0	1028	18.777	High_Score
GSM615729	1	710	17.8881	Low_Score
GSM615730	1	465	18.9422	High_Score
GSM615731	0	896	18.8138	High_Score
GSM615732	1	596	19.95	High_Score
GSM615734	0	1025	18.8251	High_Score
GSM615735	0	949	18.8771	High_Score
GSM615736	0	847	19.886	High_Score
GSM615738	0	867	18.5165	High_Score
GSM615740	0	846	18.4431	High_Score
GSM615741	0	596	20.194	High_Score
GSM615745	0	712	17.3124	Low_Score
GSM615747	0	747	17.5076	Low_Score
GSM615748	0	665	19.1353	High_Score
GSM615749	0	624	18.4966	High_Score
GSM615752	0	492	18.0133	Low_Score
GSM615753	0	526	19.614	High_Score
GSM615754	0	559	18.5033	High_Score
GSM615755	0	358	18.5972	High_Score
GSM615756	0	1242	17.9292	Low_Score
GSM615758	1	1523	19.2048	High_Score
GSM615759	0	1437	18.1929	Low_Score
GSM615760	0	1392	19.1217	High_Score
GSM615761	0	1831	17.5988	Low_Score
GSM615765	0	1672	17.9475	Low_Score
GSM615767	0	1665	18.3691	Low_Score
GSM615768	0	1890	18.3297	Low_Score
GSM615770	0	619	17.8928	Low_Score
GSM615777	0	1469	17.7943	Low_Score
GSM615778	0	1468	19.0564	High_Score
GSM615779	0	1461	19.3627	High_Score
GSM615781	0	1126	18.8253	High_Score
GSM615782	0	684	18.5181	High_Score
GSM615783	0	714	19.3086	High_Score
GSM615786	0	586	17.7828	Low_Score
GSM615788	0	1525	18.1974	Low_Score
GSM615789	0	1735	18.6364	High_Score
GSM615790	0	187	18.6937	High_Score
GSM615791	0	1505	18.192	Low_Score
GSM615792	0	1427	19.5473	High_Score
GSM615794	1	1224	18.2014	Low_Score
GSM615795	1	299	18.749	High_Score
GSM615798	0	1244	18.3843	Low_Score
GSM615799	0	1270	18.6512	High_Score
GSM615802	0	1208	18.7569	High_Score
GSM615807	0	1427	17.8554	Low_Score
GSM615808	0	1145	17.8863	Low_Score
GSM615809	0	1161	18.8851	High_Score
GSM615810	1	779	19.6706	High_Score
GSM615811	0	1248	18.203	Low_Score
GSM615814	0	1339	18.1918	Low_Score
GSM615815	0	1392	19.1378	High_Score
GSM615816	0	1234	17.9447	Low_Score
GSM615817	0	1325	18.0112	Low_Score
GSM615818	0	1070	18.3193	Low_Score
GSM615819	0	1097	18.1119	Low_Score
GSM615820	1	443	18.8236	High_Score
GSM615821	1	1009	18.947	High_Score
GSM615822	0	1001	18.7407	High_Score
GSM615825	0	894	17.7376	Low_Score
GSM615826	0	1161	18.482	High_Score
