# Supplementary material for: Tumor-derived exosomes RNA expression profiling identifies the prognosis, immune characteristics, and treatment in HR+/HER2-breast cancer
Source: Aging (Albany NY). 2023 Aug 29;15(16):8471–86. doi: 10.18632/aging.204986 (PMC10497011; doi:10.18632/aging.204986)
Supplement: Supplementary Table 6 [file aging-15-204986-s004.xlsx]

## Sheet: Table S6
Supplementary Table 6. Patients in the high-score group had a higher incidence of CNVs events.
Gene	Low_score_Ratio	High_score_Ratio	Stat	Pvalue	adjPvalue	Difference
HIVEP3	0.0226415	0.0679245	5.2808	0.0215619	0.0860642	0.045283
GUCA2B	0.0226415	0.0679245	5.2808	0.0215619	0.0860642	0.045283
GUCA2A	0.0226415	0.0679245	5.2808	0.0215619	0.0860642	0.045283
FOXJ3	0.0226415	0.0716981	6.04515	0.0139446	0.0679017	0.0490566
RIMKLA	0.0226415	0.0716981	6.04515	0.0139446	0.0679017	0.0490566
ZMYND12	0.0226415	0.0716981	6.04515	0.0139446	0.0679017	0.0490566
PPCS	0.0226415	0.0716981	6.04515	0.0139446	0.0679017	0.0490566
CCDC30	0.0226415	0.0679245	5.2808	0.0215619	0.0860642	0.045283
PPIH	0.0226415	0.0679245	5.2808	0.0215619	0.0860642	0.045283
YBX1	0.0226415	0.0679245	5.2808	0.0215619	0.0860642	0.045283
CLDN19	0.0226415	0.0716981	6.04515	0.0139446	0.0679017	0.0490566
P3H1	0.0226415	0.0716981	6.04515	0.0139446	0.0679017	0.0490566
C1orf50	0.0226415	0.0679245	5.2808	0.0215619	0.0860642	0.045283
LOC105378683	0.0226415	0.0679245	5.2808	0.0215619	0.0860642	0.045283
LOC100129924	0.0226415	0.0679245	5.2808	0.0215619	0.0860642	0.045283
SVBP	0.0226415	0.0679245	5.2808	0.0215619	0.0860642	0.045283
ERMAP	0.0226415	0.0679245	5.2808	0.0215619	0.0860642	0.045283
ZNF691	0.0226415	0.0679245	5.2808	0.0215619	0.0860642	0.045283
LOC339539	0.0226415	0.0716981	6.04515	0.0139446	0.0679017	0.0490566
FAM183A	0.0188679	0.0679245	6.54489	0.0105186	0.0584845	0.0490566
EBNA1BP2	0.0188679	0.0641509	5.73819	0.0165999	0.0747269	0.045283
CFAP57	0.0188679	0.0641509	5.73819	0.0165999	0.0747269	0.045283
MIR6733	0.0188679	0.0603774	4.95837	0.0259647	0.0937181	0.0415094
TMEM125	0.0188679	0.0603774	4.95837	0.0259647	0.0937181	0.0415094
C1orf210	0.0188679	0.0603774	4.95837	0.0259647	0.0937181	0.0415094
TIE1	0.0188679	0.0603774	4.95837	0.0259647	0.0937181	0.0415094
MPL	0.0188679	0.0603774	4.95837	0.0259647	0.0937181	0.0415094
CDC20	0.0188679	0.0603774	4.95837	0.0259647	0.0937181	0.0415094
ELOVL1	0.0188679	0.0603774	4.95837	0.0259647	0.0937181	0.0415094
MIR6734	0.0188679	0.0603774	4.95837	0.0259647	0.0937181	0.0415094
MED8	0.0188679	0.0641509	5.73819	0.0165999	0.0747269	0.045283
SZT2	0.0188679	0.0716981	7.37566	0.00661126	0.0443847	0.0528302
MIR6735	0.0188679	0.0716981	7.37566	0.00661126	0.0443847	0.0528302
HYI	0.0188679	0.0716981	7.37566	0.00661126	0.0443847	0.0528302
PTPRF	0.0226415	0.0716981	6.04515	0.0139446	0.0679017	0.0490566
KDM4A	0.0226415	0.0679245	5.2808	0.0215619	0.0860642	0.045283
TMEM53	0.0188679	0.0641509	5.73819	0.0165999	0.0747269	0.045283
KNCN	0.0226415	0.0679245	5.2808	0.0215619	0.0860642	0.045283
MKNK1	0.0264151	0.0716981	4.89393	0.0269513	0.094663	0.045283
MOB3C	0.0264151	0.0716981	4.89393	0.0269513	0.094663	0.045283
ATPAF1	0.0226415	0.0679245	5.2808	0.0215619	0.0860642	0.045283
TEX38	0.0226415	0.0679245	5.2808	0.0215619	0.0860642	0.045283
CYP4B1	0.0188679	0.0679245	6.54489	0.0105186	0.0584845	0.0490566
CYP4Z2P	0.0188679	0.0716981	7.37566	0.00661126	0.0443847	0.0528302
CYP4A11	0.0188679	0.0754717	8.22812	0.00412463	0.0342135	0.0566038
CYP4X1	0.0188679	0.0792453	9.10027	0.00255571	0.0258821	0.0603774
CYP4Z1	0.0188679	0.0716981	7.37566	0.00661126	0.0443847	0.0528302
CYP4A22	0.0188679	0.0641509	5.73819	0.0165999	0.0747269	0.045283
LINC00853	0.0188679	0.0641509	5.73819	0.0165999	0.0747269	0.045283
PDZK1IP1	0.0188679	0.0641509	5.73819	0.0165999	0.0747269	0.045283
TAL1	0.0188679	0.0679245	6.54489	0.0105186	0.0584845	0.0490566
STIL	0.0188679	0.0679245	6.54489	0.0105186	0.0584845	0.0490566
CMPK1	0.0188679	0.0679245	6.54489	0.0105186	0.0584845	0.0490566
LINC01389	0.0188679	0.0679245	6.54489	0.0105186	0.0584845	0.0490566
FOXE3	0.0188679	0.0679245	6.54489	0.0105186	0.0584845	0.0490566
FOXD2-AS1	0.0188679	0.0679245	6.54489	0.0105186	0.0584845	0.0490566
FOXD2	0.0188679	0.0679245	6.54489	0.0105186	0.0584845	0.0490566
TRABD2B	0.0264151	0.0716981	4.89393	0.0269513	0.094663	0.045283
SLC5A9	0.0264151	0.0716981	4.89393	0.0269513	0.094663	0.045283
AGBL4	0.0301887	0.0830189	5.97133	0.0145403	0.0687291	0.0528302
BEND5	0.0264151	0.0754717	5.61962	0.0177605	0.0775863	0.0490566
DMRTA2	0.0264151	0.0754717	5.61962	0.0177605	0.0775863	0.0490566
FAF1	0.0264151	0.0754717	5.61962	0.0177605	0.0775863	0.0490566
CDKN2C	0.0226415	0.0679245	5.2808	0.0215619	0.0860642	0.045283
OSBPL9	0.0264151	0.0716981	4.89393	0.0269513	0.094663	0.045283
NRDC	0.0264151	0.0754717	5.61962	0.0177605	0.0775863	0.0490566
MIR761	0.0264151	0.0716981	4.89393	0.0269513	0.094663	0.045283
RAB3B	0.0264151	0.0716981	4.89393	0.0269513	0.094663	0.045283
SLC1A7	0.0226415	0.0679245	5.2808	0.0215619	0.0860642	0.045283
CPT2	0.0226415	0.0679245	5.2808	0.0215619	0.0860642	0.045283
LRP8	0.0226415	0.0679245	5.2808	0.0215619	0.0860642	0.045283
GLIS1	0.0264151	0.0716981	4.89393	0.0269513	0.094663	0.045283
CDCP2	0.0264151	0.0716981	4.89393	0.0269513	0.094663	0.045283
SSBP3	0.0264151	0.0754717	5.61962	0.0177605	0.0775863	0.0490566
ACOT11	0.0264151	0.0716981	4.89393	0.0269513	0.094663	0.045283
FAM151A	0.0264151	0.0716981	4.89393	0.0269513	0.094663	0.045283
MROH7-TTC4	0.0226415	0.0716981	6.04515	0.0139446	0.0679017	0.0490566
MROH7	0.0226415	0.0716981	6.04515	0.0139446	0.0679017	0.0490566
TTC4	0.0226415	0.0716981	6.04515	0.0139446	0.0679017	0.0490566
LEXM	0.0226415	0.0716981	6.04515	0.0139446	0.0679017	0.0490566
PARS2	0.0226415	0.0679245	5.2808	0.0215619	0.0860642	0.045283
TTC22	0.0226415	0.0679245	5.2808	0.0215619	0.0860642	0.045283
DHCR24	0.0226415	0.0716981	6.04515	0.0139446	0.0679017	0.0490566
TMEM61	0.0264151	0.0716981	4.89393	0.0269513	0.094663	0.045283
BSND	0.0264151	0.0716981	4.89393	0.0269513	0.094663	0.045283
USP24	0.0264151	0.0754717	5.61962	0.0177605	0.0775863	0.0490566
LOC100507634	0.0264151	0.0754717	5.61962	0.0177605	0.0775863	0.0490566
MIR4422	0.0264151	0.0754717	5.61962	0.0177605	0.0775863	0.0490566
C1orf168	0.0301887	0.0792453	5.25294	0.0219097	0.0860642	0.0490566
C8A	0.0301887	0.0792453	5.25294	0.0219097	0.0860642	0.0490566
DAB1	0.0301887	0.0792453	5.25294	0.0219097	0.0860642	0.0490566
JUN	0.0264151	0.0716981	4.89393	0.0269513	0.094663	0.045283
FGGY	0.0226415	0.0716981	6.04515	0.0139446	0.0679017	0.0490566
MIR4711	0.0226415	0.0679245	5.2808	0.0215619	0.0860642	0.045283
LOC101926944	0.0226415	0.0679245	5.2808	0.0215619	0.0860642	0.045283
HOOK1	0.0226415	0.0716981	6.04515	0.0139446	0.0679017	0.0490566
CYP2J2	0.0226415	0.0716981	6.04515	0.0139446	0.0679017	0.0490566
KANK4	0.0301887	0.0792453	5.25294	0.0219097	0.0860642	0.0490566
BARHL2	0.0528302	0.109434	4.9606	0.0259312	0.0937181	0.0566038
LOC105378853	0.0528302	0.109434	4.9606	0.0259312	0.0937181	0.0566038
ZNF644	0.0528302	0.113208	5.5766	0.018202	0.0786425	0.0603774
HFM1	0.0528302	0.109434	4.9606	0.0259312	0.0937181	0.0566038
TGFBR3	0.0566038	0.116981	5.35618	0.020649	0.0848419	0.0603774
BRDT	0.0566038	0.116981	5.35618	0.020649	0.0848419	0.0603774
EPHX4	0.0566038	0.120755	5.97683	0.014495	0.0687291	0.0641509
SETSIP	0.0566038	0.124528	6.62042	0.0100816	0.0573683	0.0679245
BTBD8	0.0566038	0.128302	7.28584	0.00695002	0.0465748	0.0716981
KIAA1107	0.0566038	0.116981	5.35618	0.020649	0.0848419	0.0603774
C1orf146	0.0566038	0.116981	5.35618	0.020649	0.0848419	0.0603774
GLMN	0.0566038	0.116981	5.35618	0.020649	0.0848419	0.0603774
GFI1	0.0566038	0.116981	5.35618	0.020649	0.0848419	0.0603774
RPL5	0.0528302	0.113208	5.5766	0.018202	0.0786425	0.0603774
SNORD21	0.0528302	0.113208	5.5766	0.018202	0.0786425	0.0603774
SNORA66	0.0528302	0.113208	5.5766	0.018202	0.0786425	0.0603774
CCDC18	0.0566038	0.116981	5.35618	0.020649	0.0848419	0.0603774
CCDC18-AS1	0.0528302	0.116981	6.21672	0.0126549	0.0646502	0.0641509
DR1	0.0528302	0.116981	6.21672	0.0126549	0.0646502	0.0641509
PHGDH	0.0490566	0.10566	5.18131	0.0228312	0.087204	0.0566038
HMGCS2	0.0490566	0.10566	5.18131	0.0228312	0.087204	0.0566038
REG4	0.0490566	0.109434	5.81821	0.0158611	0.0731366	0.0603774
NBPF7	0.0490566	0.10566	5.18131	0.0228312	0.087204	0.0566038
KIFAP3	0.0528302	0.113208	5.5766	0.018202	0.0786425	0.0603774
METTL11B	0.0528302	0.109434	4.9606	0.0259312	0.0937181	0.0566038
MIR3119-1	0.0528302	0.109434	4.9606	0.0259312	0.0937181	0.0566038
MIR3119-2	0.0528302	0.109434	4.9606	0.0259312	0.0937181	0.0566038
hsa-mir-3119-1	0.0528302	0.109434	4.9606	0.0259312	0.0937181	0.0566038
LINC01142	0.0528302	0.109434	4.9606	0.0259312	0.0937181	0.0566038
LOC101928650	0.0528302	0.109434	4.9606	0.0259312	0.0937181	0.0566038
PRRC2C	0.0528302	0.113208	5.5766	0.018202	0.0786425	0.0603774
MYOC	0.0528302	0.116981	6.21672	0.0126549	0.0646502	0.0641509
VAMP4	0.0528302	0.109434	4.9606	0.0259312	0.0937181	0.0566038
METTL13	0.0528302	0.109434	4.9606	0.0259312	0.0937181	0.0566038
ASTN1	0.0528302	0.113208	5.5766	0.018202	0.0786425	0.0603774
LOC101928778	0.0528302	0.109434	4.9606	0.0259312	0.0937181	0.0566038
RASAL2	0.0566038	0.116981	5.35618	0.020649	0.0848419	0.0603774
QSOX1	0.0528302	0.116981	6.21672	0.0126549	0.0646502	0.0641509
FLJ23867	0.0528302	0.116981	6.21672	0.0126549	0.0646502	0.0641509
ACBD6	0.0641509	0.124528	4.96875	0.0258093	0.0937181	0.0603774
RGS18	0.0226415	0.0754717	6.83532	0.00893728	0.0526552	0.0528302
RGS21	0.0264151	0.0754717	5.61962	0.0177605	0.0775863	0.0490566
LINC01032	0.0264151	0.0716981	4.89393	0.0269513	0.094663	0.045283
KIF21B	0.0377358	0.0943396	5.99596	0.0143387	0.0687291	0.0566038
CACNA1S	0.0339623	0.0943396	7.07128	0.00783294	0.0490158	0.0603774
ASCL5	0.0339623	0.0943396	7.07128	0.00783294	0.0490158	0.0603774
TMEM9	0.0339623	0.0943396	7.07128	0.00783294	0.0490158	0.0603774
IGFN1	0.0339623	0.0943396	7.07128	0.00783294	0.0490158	0.0603774
LAD1	0.0415094	0.0943396	5.03655	0.0248179	0.0928143	0.0528302
TNNI1	0.0377358	0.0943396	5.99596	0.0143387	0.0687291	0.0566038
PHLDA3	0.0415094	0.0943396	5.03655	0.0248179	0.0928143	0.0528302
GPR37L1	0.045283	0.0981132	4.79086	0.0286111	0.0994176	0.0528302
ARL8A	0.045283	0.0981132	4.79086	0.0286111	0.0994176	0.0528302
PTPN7	0.0415094	0.0981132	5.69486	0.0170146	0.0759623	0.0566038
PTPRVP	0.0415094	0.101887	6.37837	0.0115519	0.0616641	0.0603774
LGR6	0.0415094	0.101887	6.37837	0.0115519	0.0616641	0.0603774
UBE2T	0.0415094	0.101887	6.37837	0.0115519	0.0616641	0.0603774
PPP1R12B	0.0415094	0.109434	7.8148	0.00518202	0.0376342	0.0679245
SYT2	0.0415094	0.109434	7.8148	0.00518202	0.0376342	0.0679245
KDM5B	0.0415094	0.109434	7.8148	0.00518202	0.0376342	0.0679245
PCAT6	0.0415094	0.109434	7.8148	0.00518202	0.0376342	0.0679245
MGAT4EP	0.0415094	0.109434	7.8148	0.00518202	0.0376342	0.0679245
LOC148709	0.0415094	0.109434	7.8148	0.00518202	0.0376342	0.0679245
RABIF	0.0415094	0.109434	7.8148	0.00518202	0.0376342	0.0679245
KLHL12	0.0415094	0.109434	7.8148	0.00518202	0.0376342	0.0679245
ADIPOR1	0.0415094	0.109434	7.8148	0.00518202	0.0376342	0.0679245
CYB5R1	0.0415094	0.109434	7.8148	0.00518202	0.0376342	0.0679245
LOC100506747	0.0415094	0.109434	7.8148	0.00518202	0.0376342	0.0679245
TMEM183A	0.0415094	0.109434	7.8148	0.00518202	0.0376342	0.0679245
PPFIA4	0.0415094	0.109434	7.8148	0.00518202	0.0376342	0.0679245
MYOG	0.0415094	0.10566	7.08549	0.00777107	0.0490158	0.0641509
ADORA1	0.0415094	0.10566	7.08549	0.00777107	0.0490158	0.0641509
MYBPH	0.0415094	0.10566	7.08549	0.00777107	0.0490158	0.0641509
CHI3L1	0.0415094	0.10566	7.08549	0.00777107	0.0490158	0.0641509
CHIT1	0.0415094	0.10566	7.08549	0.00777107	0.0490158	0.0641509
LINC01353	0.0415094	0.10566	7.08549	0.00777107	0.0490158	0.0641509
LINC01136	0.0415094	0.10566	7.08549	0.00777107	0.0490158	0.0641509
BTG2	0.0415094	0.10566	7.08549	0.00777107	0.0490158	0.0641509
FMOD	0.0415094	0.10566	7.08549	0.00777107	0.0490158	0.0641509
PRELP	0.045283	0.109434	6.76742	0.0092837	0.0539984	0.0641509
OPTC	0.045283	0.109434	6.76742	0.0092837	0.0539984	0.0641509
ATP2B4	0.0415094	0.113208	8.56502	0.00342684	0.0295673	0.0716981
LINC00260	0.0415094	0.113208	8.56502	0.00342684	0.0295673	0.0716981
SNORA77	0.0415094	0.113208	8.56502	0.00342684	0.0295673	0.0716981
LAX1	0.0415094	0.113208	8.56502	0.00342684	0.0295673	0.0716981
ZBED6	0.0415094	0.113208	8.56502	0.00342684	0.0295673	0.0716981
ZC3H11A	0.0415094	0.113208	8.56502	0.00342684	0.0295673	0.0716981
SNRPE	0.0415094	0.113208	8.56502	0.00342684	0.0295673	0.0716981
LINC00303	0.045283	0.113208	7.47317	0.00626253	0.0432733	0.0679245
SOX13	0.045283	0.113208	7.47317	0.00626253	0.0432733	0.0679245
ETNK2	0.045283	0.109434	6.76742	0.0092837	0.0539984	0.0641509
LOC101929441	0.045283	0.109434	6.76742	0.0092837	0.0539984	0.0641509
REN	0.045283	0.109434	6.76742	0.0092837	0.0539984	0.0641509
KISS1	0.045283	0.113208	7.47317	0.00626253	0.0432733	0.0679245
GOLT1A	0.045283	0.113208	7.47317	0.00626253	0.0432733	0.0679245
PLEKHA6	0.0490566	0.116981	7.16283	0.00744296	0.0482275	0.0679245
LINC00628	0.0490566	0.116981	7.16283	0.00744296	0.0482275	0.0679245
PPP1R15B	0.0490566	0.116981	7.16283	0.00744296	0.0482275	0.0679245
PIK3C2B	0.0490566	0.120755	7.86804	0.00503161	0.0376342	0.0716981
MDM4	0.0528302	0.128302	8.2698	0.004031	0.0337347	0.0754717
LRRN2	0.0490566	0.120755	7.86804	0.00503161	0.0376342	0.0716981
NFASC	0.0490566	0.120755	7.86804	0.00503161	0.0376342	0.0716981
CNTN2	0.0490566	0.109434	5.81821	0.0158611	0.0731366	0.0603774
TMEM81	0.0490566	0.109434	5.81821	0.0158611	0.0731366	0.0603774
RBBP5	0.0490566	0.109434	5.81821	0.0158611	0.0731366	0.0603774
DSTYK	0.0490566	0.109434	5.81821	0.0158611	0.0731366	0.0603774
TMCC2	0.0490566	0.109434	5.81821	0.0158611	0.0731366	0.0603774
NUAK2	0.0490566	0.10566	5.18131	0.0228312	0.087204	0.0566038
KLHDC8A	0.0490566	0.10566	5.18131	0.0228312	0.087204	0.0566038
LEMD1-AS1	0.0490566	0.109434	5.81821	0.0158611	0.0731366	0.0603774
LEMD1	0.0490566	0.109434	5.81821	0.0158611	0.0731366	0.0603774
BLACAT1	0.0490566	0.109434	5.81821	0.0158611	0.0731366	0.0603774
MIR135B	0.0490566	0.109434	5.81821	0.0158611	0.0731366	0.0603774
CDK18	0.0490566	0.109434	5.81821	0.0158611	0.0731366	0.0603774
LOC284578	0.0490566	0.109434	5.81821	0.0158611	0.0731366	0.0603774
MFSD4A	0.0490566	0.109434	5.81821	0.0158611	0.0731366	0.0603774
ELK4	0.0490566	0.109434	5.81821	0.0158611	0.0731366	0.0603774
SLC45A3	0.0490566	0.109434	5.81821	0.0158611	0.0731366	0.0603774
NUCKS1	0.0490566	0.109434	5.81821	0.0158611	0.0731366	0.0603774
RAB29	0.0490566	0.109434	5.81821	0.0158611	0.0731366	0.0603774
SLC41A1	0.0490566	0.10566	5.18131	0.0228312	0.087204	0.0566038
PM20D1	0.0490566	0.10566	5.18131	0.0228312	0.087204	0.0566038
LOC284581	0.0490566	0.10566	5.18131	0.0228312	0.087204	0.0566038
SLC26A9	0.0490566	0.10566	5.18131	0.0228312	0.087204	0.0566038
LOC103021296	0.0490566	0.10566	5.18131	0.0228312	0.087204	0.0566038
CTSE	0.0490566	0.10566	5.18131	0.0228312	0.087204	0.0566038
LOC103021295|chr1	0.0490566	0.10566	5.18131	0.0228312	0.087204	0.0566038
RAB7B	0.0490566	0.10566	5.18131	0.0228312	0.087204	0.0566038
C1orf186	0.0490566	0.10566	5.18131	0.0228312	0.087204	0.0566038
CD46	0.0490566	0.10566	5.18131	0.0228312	0.087204	0.0566038
C1orf132	0.0490566	0.10566	5.18131	0.0228312	0.087204	0.0566038
MIR29B2	0.0490566	0.10566	5.18131	0.0228312	0.087204	0.0566038
MIR29C	0.0490566	0.10566	5.18131	0.0228312	0.087204	0.0566038
LOC148696	0.0490566	0.10566	5.18131	0.0228312	0.087204	0.0566038
CD34	0.0490566	0.109434	5.81821	0.0158611	0.0731366	0.0603774
PLXNA2	0.0490566	0.10566	5.18131	0.0228312	0.087204	0.0566038
NSL1	0.0415094	0.101887	6.37837	0.0115519	0.0616641	0.0603774
TATDN3	0.0415094	0.101887	6.37837	0.0115519	0.0616641	0.0603774
SPATA45	0.0415094	0.0981132	5.69486	0.0170146	0.0759623	0.0566038
FLVCR1-AS1	0.0415094	0.0943396	5.03655	0.0248179	0.0928143	0.0528302
FLVCR1	0.0415094	0.0943396	5.03655	0.0248179	0.0928143	0.0528302
RPS6KC1	0.0415094	0.0943396	5.03655	0.0248179	0.0928143	0.0528302
LINC00538	0.0339623	0.0830189	4.93374	0.0263373	0.0941347	0.0490566
USH2A	0.045283	0.101887	5.42483	0.0198524	0.082036	0.0566038
ESRRG	0.0415094	0.0981132	5.69486	0.0170146	0.0759623	0.0566038
SPATA17	0.0377358	0.090566	5.31131	0.0211874	0.0860642	0.0528302
SPATA17-AS1	0.0339623	0.0867925	5.62061	0.0177505	0.0775863	0.0528302
LINC00210	0.0377358	0.090566	5.31131	0.0211874	0.0860642	0.0528302
LOC101929631	0.0339623	0.0867925	5.62061	0.0177505	0.0775863	0.0528302
RRP15	0.0301887	0.0867925	6.71537	0.00955857	0.0549112	0.0566038
TGFB2-AS1	0.0301887	0.0867925	6.71537	0.00955857	0.0549112	0.0566038
TGFB2	0.0301887	0.0867925	6.71537	0.00955857	0.0549112	0.0566038
MIR548F3|chr1	0.0339623	0.0943396	7.07128	0.00783294	0.0490158	0.0603774
TGFB2-OT1	0.0301887	0.0830189	5.97133	0.0145403	0.0687291	0.0528302
LYPLAL1-AS1	0.0339623	0.0943396	7.07128	0.00783294	0.0490158	0.0603774
LYPLAL1	0.0339623	0.0943396	7.07128	0.00783294	0.0490158	0.0603774
LOC102723886	0.0377358	0.0981132	6.70547	0.00961178	0.0549112	0.0603774
SLC30A10	0.0301887	0.090566	7.48306	0.00622822	0.0432733	0.0603774
EPRS	0.0264151	0.090566	8.77109	0.00306042	0.0278209	0.0641509
BPNT1	0.0264151	0.090566	8.77109	0.00306042	0.0278209	0.0641509
IARS2	0.0264151	0.090566	8.77109	0.00306042	0.0278209	0.0641509
MIR194-1	0.0264151	0.090566	8.77109	0.00306042	0.0278209	0.0641509
MIR215	0.0264151	0.090566	8.77109	0.00306042	0.0278209	0.0641509
RAB3GAP2	0.0264151	0.0943396	9.61157	0.00193355	0.0213101	0.0679245
MIR664A	0.0264151	0.0943396	9.61157	0.00193355	0.0213101	0.0679245
SNORA36B	0.0264151	0.0943396	9.61157	0.00193355	0.0213101	0.0679245
hsa-mir-664	0.0264151	0.0943396	9.61157	0.00193355	0.0213101	0.0679245
AURKAPS1	0.0264151	0.0943396	9.61157	0.00193355	0.0213101	0.0679245
MARK1	0.0264151	0.0943396	9.61157	0.00193355	0.0213101	0.0679245
C1orf115	0.0264151	0.0981132	10.4701	0.00121323	0.017743	0.0716981
2022-03-02	0.0264151	0.10566	12.2367	0.000468598	0.0124392	0.0792453
2022-03-01	0.0264151	0.10566	12.2367	0.000468598	0.0124392	0.0792453
HLX-AS1	0.0264151	0.10566	12.2367	0.000468598	0.0124392	0.0792453
LINC01352	0.0264151	0.101887	11.3455	0.000756322	0.0154644	0.0754717
HLX	0.0264151	0.10566	12.2367	0.000468598	0.0124392	0.0792453
C1orf140	0.0264151	0.10566	12.2367	0.000468598	0.0124392	0.0792453
DUSP10	0.0301887	0.101887	9.91169	0.00164232	0.0210979	0.0716981
LOC101929771	0.0301887	0.10566	10.7585	0.00103799	0.0167128	0.0754717
HHIPL2	0.0301887	0.0981132	9.08266	0.00258044	0.0258821	0.0679245
TAF1A	0.0301887	0.0981132	9.08266	0.00258044	0.0258821	0.0679245
TAF1A-AS1	0.0301887	0.0981132	9.08266	0.00258044	0.0258821	0.0679245
MIA3	0.0301887	0.0981132	9.08266	0.00258044	0.0258821	0.0679245
AIDA	0.0301887	0.0981132	9.08266	0.00258044	0.0258821	0.0679245
BROX	0.0301887	0.0981132	9.08266	0.00258044	0.0258821	0.0679245
FAM177B	0.0339623	0.0981132	7.83146	0.00513447	0.0376342	0.0641509
DISP1	0.0377358	0.0981132	6.70547	0.00961178	0.0549112	0.0603774
TLR5	0.0377358	0.0981132	6.70547	0.00961178	0.0549112	0.0603774
SUSD4	0.0415094	0.0981132	5.69486	0.0170146	0.0759623	0.0566038
CCDC185	0.0339623	0.0981132	7.83146	0.00513447	0.0376342	0.0641509
CAPN8	0.0339623	0.0867925	5.62061	0.0177505	0.0775863	0.0528302
CAPN2	0.0339623	0.0830189	4.93374	0.0263373	0.0941347	0.0490566
ACBD3	0.0415094	0.0981132	5.69486	0.0170146	0.0759623	0.0566038
MIXL1	0.0415094	0.0981132	5.69486	0.0170146	0.0759623	0.0566038
LIN9	0.0415094	0.0981132	5.69486	0.0170146	0.0759623	0.0566038
PARP1	0.0415094	0.0981132	5.69486	0.0170146	0.0759623	0.0566038
STUM	0.0415094	0.101887	6.37837	0.0115519	0.0616641	0.0603774
ITPKB	0.045283	0.10566	6.08418	0.0136397	0.0676919	0.0603774
ITPKB-IT1	0.045283	0.101887	5.42483	0.0198524	0.082036	0.0566038
PSEN2	0.0415094	0.10566	7.08549	0.00777107	0.0490158	0.0641509
COQ8A	0.0415094	0.10566	7.08549	0.00777107	0.0490158	0.0641509
CDC42BPA	0.045283	0.109434	6.76742	0.0092837	0.0539984	0.0641509
ZNF678	0.0415094	0.113208	8.56502	0.00342684	0.0295673	0.0716981
ZNF847P	0.0415094	0.113208	8.56502	0.00342684	0.0295673	0.0716981
JMJD4	0.0415094	0.113208	8.56502	0.00342684	0.0295673	0.0716981
SNAP47	0.0490566	0.113208	6.47916	0.0109147	0.0596155	0.0641509
PRSS38	0.0490566	0.113208	6.47916	0.0109147	0.0596155	0.0641509
WNT9A	0.0528302	0.113208	5.5766	0.018202	0.0786425	0.0603774
MIR5008	0.0528302	0.113208	5.5766	0.018202	0.0786425	0.0603774
WNT3A	0.0490566	0.113208	6.47916	0.0109147	0.0596155	0.0641509
ARF1	0.045283	0.113208	7.47317	0.00626253	0.0432733	0.0679245
MIR3620	0.045283	0.113208	7.47317	0.00626253	0.0432733	0.0679245
C1orf35	0.045283	0.113208	7.47317	0.00626253	0.0432733	0.0679245
MRPL55	0.045283	0.113208	7.47317	0.00626253	0.0432733	0.0679245
GJC2	0.045283	0.113208	7.47317	0.00626253	0.0432733	0.0679245
GUK1	0.045283	0.113208	7.47317	0.00626253	0.0432733	0.0679245
IBA57-AS1	0.045283	0.113208	7.47317	0.00626253	0.0432733	0.0679245
IBA57	0.045283	0.113208	7.47317	0.00626253	0.0432733	0.0679245
C1orf145	0.045283	0.109434	6.76742	0.0092837	0.0539984	0.0641509
OBSCN	0.045283	0.116981	8.20018	0.00418862	0.0342847	0.0716981
BTNL10	0.0415094	0.101887	6.37837	0.0115519	0.0616641	0.0603774
DUSP5P1	0.0415094	0.101887	6.37837	0.0115519	0.0616641	0.0603774
HIST3H2A	0.0415094	0.101887	6.37837	0.0115519	0.0616641	0.0603774
HIST3H2BB	0.0415094	0.101887	6.37837	0.0115519	0.0616641	0.0603774
HIST3H3	0.0415094	0.101887	6.37837	0.0115519	0.0616641	0.0603774
MIR4666A	0.0415094	0.101887	6.37837	0.0115519	0.0616641	0.0603774
MIR6742	0.0415094	0.101887	6.37837	0.0115519	0.0616641	0.0603774
MIR7641-2|chr1	0.0415094	0.101887	6.37837	0.0115519	0.0616641	0.0603774
RHOU	0.0415094	0.101887	6.37837	0.0115519	0.0616641	0.0603774
RNA5S10	0.0415094	0.101887	6.37837	0.0115519	0.0616641	0.0603774
RNA5S11	0.0415094	0.101887	6.37837	0.0115519	0.0616641	0.0603774
RNA5S12	0.0415094	0.101887	6.37837	0.0115519	0.0616641	0.0603774
RNA5S13	0.0415094	0.101887	6.37837	0.0115519	0.0616641	0.0603774
RNA5S14	0.0415094	0.101887	6.37837	0.0115519	0.0616641	0.0603774
RNA5S15	0.0415094	0.101887	6.37837	0.0115519	0.0616641	0.0603774
RNA5S16	0.0415094	0.101887	6.37837	0.0115519	0.0616641	0.0603774
RNA5S17	0.0415094	0.101887	6.37837	0.0115519	0.0616641	0.0603774
RNA5S1	0.0415094	0.101887	6.37837	0.0115519	0.0616641	0.0603774
RNA5S2	0.0415094	0.101887	6.37837	0.0115519	0.0616641	0.0603774
RNA5S3	0.0415094	0.101887	6.37837	0.0115519	0.0616641	0.0603774
RNA5S4	0.0415094	0.101887	6.37837	0.0115519	0.0616641	0.0603774
RNA5S5	0.0415094	0.101887	6.37837	0.0115519	0.0616641	0.0603774
RNA5S6	0.0415094	0.101887	6.37837	0.0115519	0.0616641	0.0603774
RNA5S7	0.0415094	0.101887	6.37837	0.0115519	0.0616641	0.0603774
RNA5S9	0.0415094	0.101887	6.37837	0.0115519	0.0616641	0.0603774
RNF187	0.0415094	0.101887	6.37837	0.0115519	0.0616641	0.0603774
TRIM11	0.0415094	0.101887	6.37837	0.0115519	0.0616641	0.0603774
TRIM17	0.0415094	0.101887	6.37837	0.0115519	0.0616641	0.0603774
LOC101927532	0.0415094	0.0943396	5.03655	0.0248179	0.0928143	0.0528302
GALNT2	0.045283	0.101887	5.42483	0.0198524	0.082036	0.0566038
PGBD5	0.045283	0.0981132	4.79086	0.0286111	0.0994176	0.0528302
LOC149373	0.0415094	0.0943396	5.03655	0.0248179	0.0928143	0.0528302
C1orf131	0.0415094	0.0943396	5.03655	0.0248179	0.0928143	0.0528302
GNPAT	0.0415094	0.0943396	5.03655	0.0248179	0.0928143	0.0528302
EXOC8	0.0415094	0.0943396	5.03655	0.0248179	0.0928143	0.0528302
SPRTN	0.0415094	0.0943396	5.03655	0.0248179	0.0928143	0.0528302
EGLN1	0.0415094	0.0943396	5.03655	0.0248179	0.0928143	0.0528302
SNRPD2P2	0.0415094	0.0943396	5.03655	0.0248179	0.0928143	0.0528302
TSNAX	0.0415094	0.0943396	5.03655	0.0248179	0.0928143	0.0528302
LINC00582	0.0415094	0.0943396	5.03655	0.0248179	0.0928143	0.0528302
DISC2	0.0415094	0.0981132	5.69486	0.0170146	0.0759623	0.0566038
DISC1-IT1	0.045283	0.101887	5.42483	0.0198524	0.082036	0.0566038
LOC101927683	0.045283	0.0981132	4.79086	0.0286111	0.0994176	0.0528302
NTPCR	0.045283	0.0981132	4.79086	0.0286111	0.0994176	0.0528302
PCNX2	0.0490566	0.10566	5.18131	0.0228312	0.087204	0.0566038
MLK4	0.0490566	0.10566	5.18131	0.0228312	0.087204	0.0566038
COA6	0.0528302	0.109434	4.9606	0.0259312	0.0937181	0.0566038
LOC101927765	0.0528302	0.109434	4.9606	0.0259312	0.0937181	0.0566038
TARBP1	0.0528302	0.113208	5.5766	0.018202	0.0786425	0.0603774
LINC01354	0.0528302	0.113208	5.5766	0.018202	0.0786425	0.0603774
GPR137B	0.0528302	0.113208	5.5766	0.018202	0.0786425	0.0603774
ERO1B	0.0528302	0.113208	5.5766	0.018202	0.0786425	0.0603774
RYR2	0.0603774	0.120755	5.1543	0.0231888	0.0884791	0.0603774
GREM2	0.0528302	0.113208	5.5766	0.018202	0.0786425	0.0603774
RGS7	0.0566038	0.116981	5.35618	0.020649	0.0848419	0.0603774
MIR3123	0.0490566	0.113208	6.47916	0.0109147	0.0596155	0.0641509
FH	0.0528302	0.109434	4.9606	0.0259312	0.0937181	0.0566038
KMO	0.0528302	0.113208	5.5766	0.018202	0.0786425	0.0603774
OPN3	0.0528302	0.113208	5.5766	0.018202	0.0786425	0.0603774
CHML	0.0528302	0.113208	5.5766	0.018202	0.0786425	0.0603774
WDR64	0.0528302	0.113208	5.5766	0.018202	0.0786425	0.0603774
EXO1	0.0528302	0.113208	5.5766	0.018202	0.0786425	0.0603774
BECN2	0.0490566	0.113208	6.47916	0.0109147	0.0596155	0.0641509
MAP1LC3C	0.0490566	0.113208	6.47916	0.0109147	0.0596155	0.0641509
PLD5	0.0490566	0.113208	6.47916	0.0109147	0.0596155	0.0641509
CEP170	0.045283	0.113208	7.47317	0.00626253	0.0432733	0.0679245
LINC01347	0.045283	0.113208	7.47317	0.00626253	0.0432733	0.0679245
SDCCAG8	0.0490566	0.128302	9.3388	0.00224353	0.0236065	0.0792453
MIR4677	0.045283	0.120755	8.94734	0.00277873	0.0271824	0.0754717
AKT3	0.0490566	0.128302	9.3388	0.00224353	0.0236065	0.0792453
LOC339529	0.045283	0.128302	10.4981	0.00119496	0.017743	0.0830189
ZBTB18	0.045283	0.124528	9.71363	0.00182906	0.0210979	0.0792453
C1orf100	0.0490566	0.120755	7.86804	0.00503161	0.0376342	0.0716981
ADSS	0.0490566	0.120755	7.86804	0.00503161	0.0376342	0.0716981
C1orf101	0.0490566	0.120755	7.86804	0.00503161	0.0376342	0.0716981
DESI2	0.0490566	0.120755	7.86804	0.00503161	0.0376342	0.0716981
COX20	0.045283	0.113208	7.47317	0.00626253	0.0432733	0.0679245
HNRNPU	0.045283	0.113208	7.47317	0.00626253	0.0432733	0.0679245
SNORA100	0.045283	0.113208	7.47317	0.00626253	0.0432733	0.0679245
LOC101928068	0.045283	0.109434	6.76742	0.0092837	0.0539984	0.0641509
EFCAB2	0.045283	0.109434	6.76742	0.0092837	0.0539984	0.0641509
KIF26B	0.045283	0.124528	9.71363	0.00182906	0.0210979	0.0792453
SMYD3	0.0490566	0.132075	10.1024	0.00148073	0.0200215	0.0830189
AHCTF1	0.0490566	0.124528	8.59369	0.00337329	0.0294574	0.0754717
CNST	0.0490566	0.124528	8.59369	0.00337329	0.0294574	0.0754717
LINC01341	0.0490566	0.124528	8.59369	0.00337329	0.0294574	0.0754717
LOC255654	0.0490566	0.124528	8.59369	0.00337329	0.0294574	0.0754717
SCCPDH	0.0490566	0.124528	8.59369	0.00337329	0.0294574	0.0754717
TFB2M	0.0490566	0.124528	8.59369	0.00337329	0.0294574	0.0754717
ZNF670-ZNF695	0.0490566	0.128302	9.3388	0.00224353	0.0236065	0.0792453
ZNF695	0.0490566	0.128302	9.3388	0.00224353	0.0236065	0.0792453
ZNF670	0.0490566	0.124528	8.59369	0.00337329	0.0294574	0.0754717
ZNF669	0.0490566	0.124528	8.59369	0.00337329	0.0294574	0.0754717
C1orf229	0.0490566	0.124528	8.59369	0.00337329	0.0294574	0.0754717
ZNF124	0.0490566	0.124528	8.59369	0.00337329	0.0294574	0.0754717
MIR3916	0.0490566	0.120755	7.86804	0.00503161	0.0376342	0.0716981
VN1R5	0.0490566	0.120755	7.86804	0.00503161	0.0376342	0.0716981
ZNF496	0.0490566	0.120755	7.86804	0.00503161	0.0376342	0.0716981
NLRP3	0.0490566	0.120755	7.86804	0.00503161	0.0376342	0.0716981
OR2B11	0.0490566	0.120755	7.86804	0.00503161	0.0376342	0.0716981
OR2W5	0.0490566	0.120755	7.86804	0.00503161	0.0376342	0.0716981
GCSAML	0.0528302	0.120755	6.87972	0.00871794	0.0525999	0.0679245
GCSAML-AS1	0.0490566	0.120755	7.86804	0.00503161	0.0376342	0.0716981
OR2C3	0.0490566	0.120755	7.86804	0.00503161	0.0376342	0.0716981
OR2G2	0.0528302	0.116981	6.21672	0.0126549	0.0646502	0.0641509
OR2G3	0.0528302	0.116981	6.21672	0.0126549	0.0646502	0.0641509
CPSF3	0.0188679	0.0603774	4.95837	0.0259647	0.0937181	0.0415094
IAH1	0.0188679	0.0603774	4.95837	0.0259647	0.0937181	0.0415094
ADAM17	0.0188679	0.0603774	4.95837	0.0259647	0.0937181	0.0415094
C2orf15	0.00754717	0.045283	5.94269	0.0147784	0.0689368	0.0377358
LIPT1	0.00754717	0.045283	5.94269	0.0147784	0.0689368	0.0377358
MITD1	0.00754717	0.045283	5.94269	0.0147784	0.0689368	0.0377358
MRPL30	0.00754717	0.045283	5.94269	0.0147784	0.0689368	0.0377358
LYG1	0.00754717	0.045283	5.94269	0.0147784	0.0689368	0.0377358
LYG2	0.00754717	0.045283	5.94269	0.0147784	0.0689368	0.0377358
TXNDC9	0.00754717	0.045283	5.94269	0.0147784	0.0689368	0.0377358
EIF5B	0.00754717	0.045283	5.94269	0.0147784	0.0689368	0.0377358
PLGLA	0.00754717	0.045283	5.94269	0.0147784	0.0689368	0.0377358
RGPD3	0.00754717	0.045283	5.94269	0.0147784	0.0689368	0.0377358
ST6GAL2	0.00754717	0.045283	5.94269	0.0147784	0.0689368	0.0377358
CNTNAP5	0.0301887	0.0792453	5.25294	0.0219097	0.0860642	0.0490566
RAB3GAP1	0.0264151	0.0716981	4.89393	0.0269513	0.094663	0.045283
ZRANB3	0.0264151	0.0754717	5.61962	0.0177605	0.0775863	0.0490566
R3HDM1	0.0264151	0.0754717	5.61962	0.0177605	0.0775863	0.0490566
MIR128-1	0.0264151	0.0754717	5.61962	0.0177605	0.0775863	0.0490566
UBXN4	0.0264151	0.0754717	5.61962	0.0177605	0.0775863	0.0490566
LCT	0.0264151	0.0716981	4.89393	0.0269513	0.094663	0.045283
LOC100507600	0.0264151	0.0716981	4.89393	0.0269513	0.094663	0.045283
MCM6	0.0264151	0.0716981	4.89393	0.0269513	0.094663	0.045283
DARS	0.0264151	0.0716981	4.89393	0.0269513	0.094663	0.045283
DARS-AS1	0.0264151	0.0716981	4.89393	0.0269513	0.094663	0.045283
CXCR4	0.0264151	0.0716981	4.89393	0.0269513	0.094663	0.045283
THSD7B	0.0264151	0.0754717	5.61962	0.0177605	0.0775863	0.0490566
NXPH2	0.0226415	0.0679245	5.2808	0.0215619	0.0860642	0.045283
YY1P2	0.0226415	0.0679245	5.2808	0.0215619	0.0860642	0.045283
LRP1B	0.0377358	0.109434	8.96757	0.00274814	0.0271824	0.0716981
MIR7157	0.0226415	0.0716981	6.04515	0.0139446	0.0679017	0.0490566
ARHGAP15	0.0226415	0.0679245	5.2808	0.0215619	0.0860642	0.045283
GTDC1	0.0226415	0.0679245	5.2808	0.0215619	0.0860642	0.045283
ACVR2A	0.0188679	0.0603774	4.95837	0.0259647	0.0937181	0.0415094
MBD5	0.0150943	0.0641509	7.14005	0.0075381	0.0482275	0.0490566
LYPD6B	0.0113208	0.0528302	6.07728	0.0136931	0.0676919	0.0415094
LYPD6	0.0150943	0.0566038	5.45885	0.0194694	0.0816215	0.0415094
TANK	0.00754717	0.0415094	5.04687	0.0246705	0.0928143	0.0339623
LOC101929512	0.00754717	0.0415094	5.04687	0.0246705	0.0928143	0.0339623
LOC100996579	0.00754717	0.0415094	5.04687	0.0246705	0.0928143	0.0339623
PSMD14	0.00754717	0.0415094	5.04687	0.0246705	0.0928143	0.0339623
BBS5	0.00754717	0.045283	5.94269	0.0147784	0.0689368	0.0377358
KLHL41	0.00754717	0.045283	5.94269	0.0147784	0.0689368	0.0377358
FASTKD1	0.00754717	0.045283	5.94269	0.0147784	0.0689368	0.0377358
PPIG	0.00754717	0.0415094	5.04687	0.0246705	0.0928143	0.0339623
CCDC173	0.00754717	0.045283	5.94269	0.0147784	0.0689368	0.0377358
PHOSPHO2-KLHL23	0.00754717	0.0415094	5.04687	0.0246705	0.0928143	0.0339623
PHOSPHO2	0.00754717	0.0415094	5.04687	0.0246705	0.0928143	0.0339623
KLHL23	0.00754717	0.0415094	5.04687	0.0246705	0.0928143	0.0339623
SSB	0.00754717	0.0415094	5.04687	0.0246705	0.0928143	0.0339623
METTL5	0.00754717	0.0415094	5.04687	0.0246705	0.0928143	0.0339623
UBR3	0.00754717	0.045283	5.94269	0.0147784	0.0689368	0.0377358
MYO3B	0.00754717	0.0528302	7.79791	0.00523067	0.0376342	0.045283
LOC101929753	0.00754717	0.045283	5.94269	0.0147784	0.0689368	0.0377358
LOC101926913	0.00754717	0.0528302	7.79791	0.00523067	0.0376342	0.045283
LINC01124	0.00754717	0.0490566	6.86084	0.00881051	0.0525999	0.0415094
SP5	0.00754717	0.0490566	6.86084	0.00881051	0.0525999	0.0415094
ERICH2	0.00754717	0.0490566	6.86084	0.00881051	0.0525999	0.0415094
GAD1	0.0113208	0.0490566	5.22009	0.0223274	0.0860642	0.0377358
CYBRD1	0.0113208	0.0490566	5.22009	0.0223274	0.0860642	0.0377358
SLC25A12	0.0113208	0.0490566	5.22009	0.0223274	0.0860642	0.0377358
PDK1	0.0113208	0.0490566	5.22009	0.0223274	0.0860642	0.0377358
FRZB	0.00754717	0.045283	5.94269	0.0147784	0.0689368	0.0377358
NCKAP1	0.00754717	0.045283	5.94269	0.0147784	0.0689368	0.0377358
WDR75	0.0188679	0.0603774	4.95837	0.0259647	0.0937181	0.0415094
SLC40A1	0.0188679	0.0603774	4.95837	0.0259647	0.0937181	0.0415094
STK17B	0.0188679	0.0641509	5.73819	0.0165999	0.0747269	0.045283
HECW2	0.0188679	0.0716981	7.37566	0.00661126	0.0443847	0.0528302
LOC101927482	0.0188679	0.0679245	6.54489	0.0105186	0.0584845	0.0490566
CCDC150	0.0188679	0.0679245	6.54489	0.0105186	0.0584845	0.0490566
LOC100130452	0.0188679	0.0641509	5.73819	0.0165999	0.0747269	0.045283
GTF3C3	0.0188679	0.0641509	5.73819	0.0165999	0.0747269	0.045283
C2orf66	0.0188679	0.0641509	5.73819	0.0165999	0.0747269	0.045283
PGAP1	0.0188679	0.0641509	5.73819	0.0165999	0.0747269	0.045283
ANKRD44	0.0188679	0.0641509	5.73819	0.0165999	0.0747269	0.045283
LOC101927596	0.0188679	0.0641509	5.73819	0.0165999	0.0747269	0.045283
ANKRD44-IT1	0.0188679	0.0641509	5.73819	0.0165999	0.0747269	0.045283
SF3B1	0.0188679	0.0641509	5.73819	0.0165999	0.0747269	0.045283
COQ10B	0.0188679	0.0641509	5.73819	0.0165999	0.0747269	0.045283
HSPD1	0.0188679	0.0603774	4.95837	0.0259647	0.0937181	0.0415094
SNORA105A|chr2	0.0188679	0.0603774	4.95837	0.0259647	0.0937181	0.0415094
HSPE1-MOB4	0.0188679	0.0603774	4.95837	0.0259647	0.0937181	0.0415094
HSPE1	0.0188679	0.0603774	4.95837	0.0259647	0.0937181	0.0415094
MOB4	0.0188679	0.0603774	4.95837	0.0259647	0.0937181	0.0415094
MARS2	0.0150943	0.0566038	5.45885	0.0194694	0.0816215	0.0415094
SATB2-AS1	0.0150943	0.0566038	5.45885	0.0194694	0.0816215	0.0415094
LOC101927641	0.0150943	0.0566038	5.45885	0.0194694	0.0816215	0.0415094
FTCDNL1	0.0150943	0.0566038	5.45885	0.0194694	0.0816215	0.0415094
C2orf69	0.0150943	0.0566038	5.45885	0.0194694	0.0816215	0.0415094
KIAA2012	0.0150943	0.0603774	6.28725	0.0121609	0.062619	0.045283
SUMO1	0.0150943	0.0566038	5.45885	0.0194694	0.0816215	0.0415094
NOP58	0.0150943	0.0603774	6.28725	0.0121609	0.062619	0.045283
SNORD70	0.0150943	0.0603774	6.28725	0.0121609	0.062619	0.045283
SNORD11B	0.0150943	0.0603774	6.28725	0.0121609	0.062619	0.045283
SNORD11	0.0150943	0.0603774	6.28725	0.0121609	0.062619	0.045283
BMPR2	0.0150943	0.0603774	6.28725	0.0121609	0.062619	0.045283
FAM117B	0.0113208	0.0641509	8.78137	0.00304322	0.0278209	0.0528302
ICA1L	0.0113208	0.0603774	7.86075	0.00505195	0.0376342	0.0490566
WDR12	0.0113208	0.0603774	7.86075	0.00505195	0.0376342	0.0490566
CARF	0.0113208	0.0641509	8.78137	0.00304322	0.0278209	0.0528302
NBEAL1	0.0188679	0.0679245	6.54489	0.0105186	0.0584845	0.0490566
CYP20A1	0.0188679	0.0641509	5.73819	0.0165999	0.0747269	0.045283
ABI2	0.0188679	0.0641509	5.73819	0.0165999	0.0747269	0.045283
RAPH1	0.0188679	0.0641509	5.73819	0.0165999	0.0747269	0.045283
MAP2	0.00754717	0.0528302	7.79791	0.00523067	0.0376342	0.045283
UNC80	0.00754717	0.0528302	7.79791	0.00523067	0.0376342	0.045283
RPE	0.00754717	0.0490566	6.86084	0.00881051	0.0525999	0.0415094
KANSL1L	0.00754717	0.0528302	7.79791	0.00523067	0.0376342	0.045283
LOC101928020	0.00754717	0.0528302	7.79791	0.00523067	0.0376342	0.045283
ACADL	0.00754717	0.0528302	7.79791	0.00523067	0.0376342	0.045283
MYL1	0.00754717	0.0528302	7.79791	0.00523067	0.0376342	0.045283
LANCL1-AS1	0.00754717	0.0528302	7.79791	0.00523067	0.0376342	0.045283
LANCL1	0.00754717	0.0528302	7.79791	0.00523067	0.0376342	0.045283
CPS1	0.00754717	0.0528302	7.79791	0.00523067	0.0376342	0.045283
CPS1-IT1	0.00754717	0.0490566	6.86084	0.00881051	0.0525999	0.0415094
ERBB4	0.0188679	0.0641509	5.73819	0.0165999	0.0747269	0.045283
LOC102725079	0.0150943	0.0603774	6.28725	0.0121609	0.062619	0.045283
MIR4776-1	0.0150943	0.0603774	6.28725	0.0121609	0.062619	0.045283
IKZF2	0.0150943	0.0641509	7.14005	0.0075381	0.0482275	0.0490566
LOC100130451	0.0113208	0.0641509	8.78137	0.00304322	0.0278209	0.0528302
SPAG16	0.0113208	0.0754717	11.6354	0.000647096	0.0140668	0.0641509
MIR4438	0.00754717	0.0603774	9.71897	0.00182376	0.0210979	0.0528302
VWC2L	0.00754717	0.0679245	11.6912	0.000627972	0.0140168	0.0603774
VWC2L-IT1	0.00754717	0.0679245	11.6912	0.000627972	0.0140168	0.0603774
BARD1	0.0113208	0.0641509	8.78137	0.00304322	0.0278209	0.0528302
LOC101928103	0.0113208	0.0716981	10.6702	0.00108876	0.0167128	0.0603774
ABCA12	0.0113208	0.0679245	9.7184	0.00182432	0.0210979	0.0566038
ATIC	0.0113208	0.0716981	10.6702	0.00108876	0.0167128	0.0603774
FN1	0.0113208	0.0716981	10.6702	0.00108876	0.0167128	0.0603774
LOC102724849	0.0113208	0.0679245	9.7184	0.00182432	0.0210979	0.0566038
LINC00607	0.0150943	0.0754717	9.81966	0.00172656	0.0210979	0.0603774
LINC01614	0.0150943	0.0754717	9.81966	0.00172656	0.0210979	0.0603774
MREG	0.0150943	0.0754717	9.81966	0.00172656	0.0210979	0.0603774
PECR	0.0150943	0.0679245	8.0145	0.00464044	0.0367446	0.0528302
TMEM169	0.0150943	0.0679245	8.0145	0.00464044	0.0367446	0.0528302
XRCC5	0.0150943	0.0679245	8.0145	0.00464044	0.0367446	0.0528302
PKI55	0.0113208	0.0641509	8.78137	0.00304322	0.0278209	0.0528302
2022-03-04	0.0150943	0.0641509	7.14005	0.0075381	0.0482275	0.0490566
SMARCAL1	0.0150943	0.0641509	7.14005	0.0075381	0.0482275	0.0490566
RPL37A	0.0150943	0.0641509	7.14005	0.0075381	0.0482275	0.0490566
LINC01280	0.0150943	0.0603774	6.28725	0.0121609	0.062619	0.045283
IGFBP2	0.0188679	0.0603774	4.95837	0.0259647	0.0937181	0.0415094
IGFBP5	0.0188679	0.0603774	4.95837	0.0259647	0.0937181	0.0415094
TNP1	0.0150943	0.0603774	6.28725	0.0121609	0.062619	0.045283
LOC105373876	0.0150943	0.0603774	6.28725	0.0121609	0.062619	0.045283
LOC101928327	0.0150943	0.0603774	6.28725	0.0121609	0.062619	0.045283
DIRC3-AS1	0.0150943	0.0679245	8.0145	0.00464044	0.0367446	0.0528302
DIRC3	0.0150943	0.0754717	9.81966	0.00172656	0.0210979	0.0603774
TNS1	0.0150943	0.0716981	8.90833	0.00283873	0.0271824	0.0566038
MIR6809	0.0150943	0.0716981	8.90833	0.00283873	0.0271824	0.0566038
LOC105373878	0.0150943	0.0716981	8.90833	0.00283873	0.0271824	0.0566038
RUFY4	0.0150943	0.0716981	8.90833	0.00283873	0.0271824	0.0566038
CXCR2P1	0.0150943	0.0716981	8.90833	0.00283873	0.0271824	0.0566038
CXCR2	0.0150943	0.0679245	8.0145	0.00464044	0.0367446	0.0528302
CXCR1	0.0150943	0.0716981	8.90833	0.00283873	0.0271824	0.0566038
ARPC2	0.0150943	0.0716981	8.90833	0.00283873	0.0271824	0.0566038
AAMP	0.0150943	0.0679245	8.0145	0.00464044	0.0367446	0.0528302
GPBAR1	0.0150943	0.0679245	8.0145	0.00464044	0.0367446	0.0528302
PNKD	0.0150943	0.0716981	8.90833	0.00283873	0.0271824	0.0566038
TMBIM1	0.0150943	0.0679245	8.0145	0.00464044	0.0367446	0.0528302
MIR6513	0.0150943	0.0679245	8.0145	0.00464044	0.0367446	0.0528302
CATIP-AS2	0.0113208	0.0716981	10.6702	0.00108876	0.0167128	0.0603774
MIR6810	0.0113208	0.0679245	9.7184	0.00182432	0.0210979	0.0566038
CATIP	0.0113208	0.0716981	10.6702	0.00108876	0.0167128	0.0603774
CATIP-AS1	0.0113208	0.0716981	10.6702	0.00108876	0.0167128	0.0603774
SLC11A1	0.0113208	0.0716981	10.6702	0.00108876	0.0167128	0.0603774
CTDSP1	0.0113208	0.0716981	10.6702	0.00108876	0.0167128	0.0603774
MIR26B	0.0113208	0.0716981	10.6702	0.00108876	0.0167128	0.0603774
VIL1	0.0113208	0.0716981	10.6702	0.00108876	0.0167128	0.0603774
USP37	0.0113208	0.0716981	10.6702	0.00108876	0.0167128	0.0603774
CNOT9	0.0113208	0.0679245	9.7184	0.00182432	0.0210979	0.0566038
PLCD4	0.0113208	0.0679245	9.7184	0.00182432	0.0210979	0.0566038
ZNF142	0.0113208	0.0679245	9.7184	0.00182432	0.0210979	0.0566038
BCS1L	0.0113208	0.0679245	9.7184	0.00182432	0.0210979	0.0566038
RNF25	0.0113208	0.0679245	9.7184	0.00182432	0.0210979	0.0566038
STK36	0.0113208	0.0679245	9.7184	0.00182432	0.0210979	0.0566038
TTLL4	0.0113208	0.0679245	9.7184	0.00182432	0.0210979	0.0566038
CYP27A1	0.0113208	0.0679245	9.7184	0.00182432	0.0210979	0.0566038
MIR9500	0.0150943	0.0641509	7.14005	0.0075381	0.0482275	0.0490566
PRKAG3	0.0150943	0.0641509	7.14005	0.0075381	0.0482275	0.0490566
WNT6	0.0150943	0.0641509	7.14005	0.0075381	0.0482275	0.0490566
WNT10A	0.0150943	0.0641509	7.14005	0.0075381	0.0482275	0.0490566
LINC01494	0.0150943	0.0641509	7.14005	0.0075381	0.0482275	0.0490566
CDK5R2	0.0150943	0.0679245	8.0145	0.00464044	0.0367446	0.0528302
CRYBA2	0.0150943	0.0679245	8.0145	0.00464044	0.0367446	0.0528302
FEV	0.0150943	0.0679245	8.0145	0.00464044	0.0367446	0.0528302
LINC00608	0.0150943	0.0679245	8.0145	0.00464044	0.0367446	0.0528302
CFAP65	0.0150943	0.0679245	8.0145	0.00464044	0.0367446	0.0528302
LOC100129175	0.0150943	0.0679245	8.0145	0.00464044	0.0367446	0.0528302
MIR375	0.0150943	0.0679245	8.0145	0.00464044	0.0367446	0.0528302
IHH	0.0150943	0.0679245	8.0145	0.00464044	0.0367446	0.0528302
MIR3131	0.0150943	0.0679245	8.0145	0.00464044	0.0367446	0.0528302
NHEJ1	0.0150943	0.0716981	8.90833	0.00283873	0.0271824	0.0566038
SLC23A3	0.0150943	0.0716981	8.90833	0.00283873	0.0271824	0.0566038
CNPPD1	0.0150943	0.0716981	8.90833	0.00283873	0.0271824	0.0566038
FAM134A	0.0150943	0.0716981	8.90833	0.00283873	0.0271824	0.0566038
ABCB6	0.0113208	0.0716981	10.6702	0.00108876	0.0167128	0.0603774
ZFAND2B	0.0113208	0.0716981	10.6702	0.00108876	0.0167128	0.0603774
ATG9A	0.0113208	0.0716981	10.6702	0.00108876	0.0167128	0.0603774
ANKZF1	0.0113208	0.0716981	10.6702	0.00108876	0.0167128	0.0603774
GLB1L	0.0113208	0.0716981	10.6702	0.00108876	0.0167128	0.0603774
STK16	0.0113208	0.0716981	10.6702	0.00108876	0.0167128	0.0603774
TUBA4A	0.0113208	0.0716981	10.6702	0.00108876	0.0167128	0.0603774
TUBA4B	0.0113208	0.0716981	10.6702	0.00108876	0.0167128	0.0603774
DNAJB2	0.0113208	0.0716981	10.6702	0.00108876	0.0167128	0.0603774
PTPRN	0.0113208	0.0716981	10.6702	0.00108876	0.0167128	0.0603774
MIR153-1	0.0113208	0.0716981	10.6702	0.00108876	0.0167128	0.0603774
RESP18	0.0113208	0.0716981	10.6702	0.00108876	0.0167128	0.0603774
DNPEP	0.0150943	0.0716981	8.90833	0.00283873	0.0271824	0.0566038
DES	0.0150943	0.0716981	8.90833	0.00283873	0.0271824	0.0566038
SPEG	0.0150943	0.0716981	8.90833	0.00283873	0.0271824	0.0566038
GMPPA	0.0150943	0.0716981	8.90833	0.00283873	0.0271824	0.0566038
LOC100996693	0.0150943	0.0716981	8.90833	0.00283873	0.0271824	0.0566038
ASIC4	0.0150943	0.0716981	8.90833	0.00283873	0.0271824	0.0566038
CHPF	0.0150943	0.0716981	8.90833	0.00283873	0.0271824	0.0566038
TMEM198	0.0150943	0.0679245	8.0145	0.00464044	0.0367446	0.0528302
MIR3132	0.0150943	0.0679245	8.0145	0.00464044	0.0367446	0.0528302
OBSL1	0.0150943	0.0679245	8.0145	0.00464044	0.0367446	0.0528302
INHA	0.0150943	0.0679245	8.0145	0.00464044	0.0367446	0.0528302
STK11IP	0.0150943	0.0641509	7.14005	0.0075381	0.0482275	0.0490566
SLC4A3	0.0150943	0.0641509	7.14005	0.0075381	0.0482275	0.0490566
MIR4268	0.0150943	0.0641509	7.14005	0.0075381	0.0482275	0.0490566
EPHA4	0.0150943	0.0679245	8.0145	0.00464044	0.0367446	0.0528302
PAX3	0.0150943	0.0716981	8.90833	0.00283873	0.0271824	0.0566038
CCDC140	0.0150943	0.0716981	8.90833	0.00283873	0.0271824	0.0566038
LOC440934	0.0150943	0.0754717	9.81966	0.00172656	0.0210979	0.0603774
SGPP2	0.0188679	0.0792453	9.10027	0.00255571	0.0258821	0.0603774
FARSB	0.0188679	0.0792453	9.10027	0.00255571	0.0258821	0.0603774
MOGAT1	0.0150943	0.0792453	10.7469	0.00104452	0.0167128	0.0641509
ACSL3	0.0150943	0.0830189	11.6888	0.000628775	0.0140168	0.0679245
KCNE4	0.0150943	0.0830189	11.6888	0.000628775	0.0140168	0.0679245
SCG2	0.0226415	0.0830189	8.48392	0.00358299	0.0307107	0.0603774
AP1S3	0.0188679	0.0754717	8.22812	0.00412463	0.0342135	0.0566038
WDFY1	0.0188679	0.0754717	8.22812	0.00412463	0.0342135	0.0566038
MRPL44	0.0188679	0.0716981	7.37566	0.00661126	0.0443847	0.0528302
SERPINE2	0.0188679	0.0716981	7.37566	0.00661126	0.0443847	0.0528302
FAM124B	0.0188679	0.0716981	7.37566	0.00661126	0.0443847	0.0528302
CUL3	0.0226415	0.0754717	6.83532	0.00893728	0.0526552	0.0528302
DOCK10	0.0226415	0.0754717	6.83532	0.00893728	0.0526552	0.0528302
MIR4439	0.0226415	0.0754717	6.83532	0.00893728	0.0526552	0.0528302
NYAP2	0.0226415	0.0792453	7.64892	0.00568063	0.0407026	0.0566038
LOC646736	0.0226415	0.0830189	8.48392	0.00358299	0.0307107	0.0603774
MIR5702	0.0188679	0.0867925	10.8971	0.000963136	0.0162441	0.0679245
IRS1	0.0188679	0.0867925	10.8971	0.000963136	0.0162441	0.0679245
RHBDD1	0.0188679	0.0867925	10.8971	0.000963136	0.0162441	0.0679245
COL4A4	0.0150943	0.0867925	12.6441	0.000376746	0.0115529	0.0716981
COL4A3	0.0150943	0.0867925	12.6441	0.000376746	0.0115529	0.0716981
LOC654841	0.0150943	0.0867925	12.6441	0.000376746	0.0115529	0.0716981
MFF	0.0150943	0.0867925	12.6441	0.000376746	0.0115529	0.0716981
TM4SF20	0.0150943	0.090566	13.612	0.000224747	0.0100224	0.0754717
AGFG1	0.0150943	0.090566	13.612	0.000224747	0.0100224	0.0754717
MIR5703	0.0150943	0.090566	13.612	0.000224747	0.0100224	0.0754717
C2orf83	0.0150943	0.090566	13.612	0.000224747	0.0100224	0.0754717
SLC19A3	0.0150943	0.090566	13.612	0.000224747	0.0100224	0.0754717
CCL20	0.0150943	0.0867925	12.6441	0.000376746	0.0115529	0.0716981
DAW1	0.0188679	0.0867925	10.8971	0.000963136	0.0162441	0.0679245
SPHKAP	0.0226415	0.0867925	9.33856	0.00224381	0.0236065	0.0641509
PID1	0.0226415	0.090566	10.2113	0.0013958	0.0197895	0.0679245
DNER	0.0226415	0.0981132	12.0061	0.000530253	0.0132248	0.0754717
FBXO36	0.0188679	0.0981132	13.7048	0.000213904	0.0100224	0.0792453
TRIP12	0.0188679	0.0981132	13.7048	0.000213904	0.0100224	0.0792453
SLC16A14	0.0188679	0.0981132	13.7048	0.000213904	0.0100224	0.0792453
SP110	0.0188679	0.0943396	12.7553	0.000354995	0.0115529	0.0754717
SP140	0.0188679	0.0943396	12.7553	0.000354995	0.0115529	0.0754717
SP140L	0.0188679	0.0943396	12.7553	0.000354995	0.0115529	0.0754717
SP100	0.0226415	0.090566	10.2113	0.0013958	0.0197895	0.0679245
LOC151475	0.0226415	0.090566	10.2113	0.0013958	0.0197895	0.0679245
CAB39	0.0226415	0.090566	10.2113	0.0013958	0.0197895	0.0679245
ITM2C	0.0226415	0.090566	10.2113	0.0013958	0.0197895	0.0679245
LOC151484	0.0226415	0.0943396	11.1009	0.000862853	0.0162441	0.0716981
GPR55	0.0226415	0.0943396	11.1009	0.000862853	0.0162441	0.0716981
SPATA3-AS1	0.0226415	0.090566	10.2113	0.0013958	0.0197895	0.0679245
SPATA3	0.0226415	0.090566	10.2113	0.0013958	0.0197895	0.0679245
C2orf72	0.0226415	0.090566	10.2113	0.0013958	0.0197895	0.0679245
PSMD1	0.0188679	0.0943396	12.7553	0.000354995	0.0115529	0.0754717
HTR2B	0.0188679	0.0943396	12.7553	0.000354995	0.0115529	0.0754717
ARMC9	0.0226415	0.090566	10.2113	0.0013958	0.0197895	0.0679245
MIR4777	0.0226415	0.0867925	9.33856	0.00224381	0.0236065	0.0641509
B3GNT7	0.0188679	0.0867925	10.8971	0.000963136	0.0162441	0.0679245
NCL	0.0188679	0.0981132	13.7048	0.000213904	0.0100224	0.0792453
SNORA75	0.0188679	0.0981132	13.7048	0.000213904	0.0100224	0.0792453
SNORD20	0.0188679	0.0981132	13.7048	0.000213904	0.0100224	0.0792453
SNORD82	0.0188679	0.0981132	13.7048	0.000213904	0.0100224	0.0792453
C2orf57	0.0188679	0.0943396	12.7553	0.000354995	0.0115529	0.0754717
LINC00471	0.0188679	0.0943396	12.7553	0.000354995	0.0115529	0.0754717
NMUR1	0.0188679	0.0943396	12.7553	0.000354995	0.0115529	0.0754717
PTMA	0.0264151	0.0943396	9.61157	0.00193355	0.0213101	0.0679245
MIR1244-1|chr2	0.0264151	0.0943396	9.61157	0.00193355	0.0213101	0.0679245
MIR1244-2|chr2	0.0264151	0.0943396	9.61157	0.00193355	0.0213101	0.0679245
MIR1244-3|chr2	0.0264151	0.0943396	9.61157	0.00193355	0.0213101	0.0679245
hsa-mir-1244-1	0.0264151	0.0943396	9.61157	0.00193355	0.0213101	0.0679245
PDE6D	0.0264151	0.0981132	10.4701	0.00121323	0.017743	0.0716981
COPS7B	0.0264151	0.0981132	10.4701	0.00121323	0.017743	0.0716981
MIR1471	0.0188679	0.0943396	12.7553	0.000354995	0.0115529	0.0754717
NPPC	0.0188679	0.0943396	12.7553	0.000354995	0.0115529	0.0754717
DIS3L2	0.0188679	0.109434	16.6254	4.55381e-05	0.007204	0.090566
MIR562	0.0188679	0.0981132	13.7048	0.000213904	0.0100224	0.0792453
ALPPL2	0.0188679	0.101887	14.6668	0.000128287	0.00834024	0.0830189
ALPP	0.0188679	0.101887	14.6668	0.000128287	0.00834024	0.0830189
ECEL1P2	0.0188679	0.101887	14.6668	0.000128287	0.00834024	0.0830189
ALPI	0.0188679	0.101887	14.6668	0.000128287	0.00834024	0.0830189
ECEL1	0.0188679	0.101887	14.6668	0.000128287	0.00834024	0.0830189
PRSS56	0.0188679	0.101887	14.6668	0.000128287	0.00834024	0.0830189
CHRND	0.0188679	0.101887	14.6668	0.000128287	0.00834024	0.0830189
CHRNG	0.0188679	0.101887	14.6668	0.000128287	0.00834024	0.0830189
TIGD1	0.0188679	0.0981132	13.7048	0.000213904	0.0100224	0.0792453
EIF4E2	0.0226415	0.0981132	12.0061	0.000530253	0.0132248	0.0754717
MIR5001	0.0188679	0.0981132	13.7048	0.000213904	0.0100224	0.0792453
EFHD1	0.0226415	0.101887	12.926	0.000324042	0.0115529	0.0792453
GIGYF2	0.0188679	0.101887	14.6668	0.000128287	0.00834024	0.0830189
KCNJ13	0.0188679	0.101887	14.6668	0.000128287	0.00834024	0.0830189
C2orf82	0.0226415	0.101887	12.926	0.000324042	0.0115529	0.0792453
NGEF	0.0226415	0.10566	13.8597	0.000196977	0.0100224	0.0830189
LOC101928881	0.0226415	0.10566	13.8597	0.000196977	0.0100224	0.0830189
NEU2	0.0226415	0.10566	13.8597	0.000196977	0.0100224	0.0830189
INPP5D	0.0226415	0.10566	13.8597	0.000196977	0.0100224	0.0830189
ATG16L1	0.0226415	0.10566	13.8597	0.000196977	0.0100224	0.0830189
SCARNA5	0.0226415	0.10566	13.8597	0.000196977	0.0100224	0.0830189
SCARNA6	0.0188679	0.101887	14.6668	0.000128287	0.00834024	0.0830189
SAG	0.0188679	0.101887	14.6668	0.000128287	0.00834024	0.0830189
DGKD	0.0226415	0.101887	12.926	0.000324042	0.0115529	0.0792453
USP40	0.0188679	0.10566	15.6405	7.6596e-05	0.0073589	0.0867925
UGT1A10	0.0264151	0.0981132	10.4701	0.00121323	0.017743	0.0716981
UGT1A8	0.0264151	0.0981132	10.4701	0.00121323	0.017743	0.0716981
UGT1A9	0.0264151	0.0981132	10.4701	0.00121323	0.017743	0.0716981
UGT1A7	0.0264151	0.0981132	10.4701	0.00121323	0.017743	0.0716981
UGT1A6	0.0264151	0.0981132	10.4701	0.00121323	0.017743	0.0716981
UGT1A5	0.0226415	0.0981132	12.0061	0.000530253	0.0132248	0.0754717
UGT1A4	0.0226415	0.0981132	12.0061	0.000530253	0.0132248	0.0754717
UGT1A3	0.0226415	0.0981132	12.0061	0.000530253	0.0132248	0.0754717
DNAJB3	0.0226415	0.0981132	12.0061	0.000530253	0.0132248	0.0754717
LOC100286922	0.0226415	0.0981132	12.0061	0.000530253	0.0132248	0.0754717
UGT1A1	0.0226415	0.0981132	12.0061	0.000530253	0.0132248	0.0754717
MROH2A	0.0264151	0.0981132	10.4701	0.00121323	0.017743	0.0716981
HJURP	0.0264151	0.0981132	10.4701	0.00121323	0.017743	0.0716981
MSL3P1	0.0264151	0.0981132	10.4701	0.00121323	0.017743	0.0716981
TRPM8	0.0301887	0.10566	10.7585	0.00103799	0.0167128	0.0754717
SPP2	0.0415094	0.10566	7.08549	0.00777107	0.0490158	0.0641509
ARL4C	0.0264151	0.10566	12.2367	0.000468598	0.0124392	0.0792453
LINC01173	0.0264151	0.109434	13.1427	0.00028864	0.0111459	0.0830189
SH3BP4	0.0301887	0.113208	12.5016	0.000406603	0.0118778	0.0830189
AGAP1	0.0226415	0.116981	16.7359	4.29598e-05	0.00702163	0.0943396
AGAP1-IT1	0.0226415	0.109434	14.8063	0.000119134	0.00834024	0.0867925
GBX2	0.0226415	0.109434	14.8063	0.000119134	0.00834024	0.0867925
ASB18	0.0226415	0.113208	15.7653	7.17059e-05	0.0073589	0.090566
IQCA1	0.0226415	0.113208	15.7653	7.17059e-05	0.0073589	0.090566
ACKR3	0.0226415	0.109434	14.8063	0.000119134	0.00834024	0.0867925
LOC93463	0.0226415	0.113208	15.7653	7.17059e-05	0.0073589	0.090566
COPS8	0.0226415	0.113208	15.7653	7.17059e-05	0.0073589	0.090566
COL6A3	0.0226415	0.113208	15.7653	7.17059e-05	0.0073589	0.090566
MLPH	0.0226415	0.116981	16.7359	4.29598e-05	0.00702163	0.0943396
MIR6811	0.0226415	0.113208	15.7653	7.17059e-05	0.0073589	0.090566
PRLH	0.0226415	0.116981	16.7359	4.29598e-05	0.00702163	0.0943396
RAB17	0.0226415	0.120755	17.7177	2.56232e-05	0.00607546	0.0981132
LRRFIP1	0.0264151	0.128302	17.8702	2.36493e-05	0.00607546	0.101887
RBM44	0.0226415	0.128302	19.7128	8.99987e-06	0.00607546	0.10566
RAMP1	0.0226415	0.124528	18.7101	1.52173e-05	0.00607546	0.101887
UBE2F-SCLY	0.0264151	0.116981	14.9963	0.000107725	0.00834024	0.090566
UBE2F	0.0264151	0.116981	14.9963	0.000107725	0.00834024	0.090566
SCLY	0.0264151	0.116981	14.9963	0.000107725	0.00834024	0.090566
ESPNL	0.0264151	0.113208	14.0628	0.000176804	0.0100224	0.0867925
KLHL30	0.0264151	0.113208	14.0628	0.000176804	0.0100224	0.0867925
ERFE	0.0264151	0.113208	14.0628	0.000176804	0.0100224	0.0867925
ILKAP	0.0226415	0.113208	15.7653	7.17059e-05	0.0073589	0.090566
LOC151174	0.0226415	0.109434	14.8063	0.000119134	0.00834024	0.0867925
LOC643387	0.0226415	0.109434	14.8063	0.000119134	0.00834024	0.0867925
HES6	0.0226415	0.109434	14.8063	0.000119134	0.00834024	0.0867925
PER2	0.0226415	0.109434	14.8063	0.000119134	0.00834024	0.0867925
TRAF3IP1	0.0264151	0.109434	13.1427	0.00028864	0.0111459	0.0830189
ASB1	0.0226415	0.113208	15.7653	7.17059e-05	0.0073589	0.090566
LINC01107	0.0188679	0.113208	17.6208	2.69626e-05	0.00607546	0.0943396
FLJ43879	0.0264151	0.116981	14.9963	0.000107725	0.00834024	0.090566
HDAC4	0.0339623	0.120755	12.7947	0.000347611	0.0115529	0.0867925
MIR4440	0.0264151	0.116981	14.9963	0.000107725	0.00834024	0.090566
MIR4441	0.0264151	0.116981	14.9963	0.000107725	0.00834024	0.090566
TWIST2	0.0264151	0.116981	14.9963	0.000107725	0.00834024	0.090566
MGC16025	0.0301887	0.116981	13.396	0.000252161	0.0106556	0.0867925
MIR4269	0.0301887	0.113208	12.5016	0.000406603	0.0118778	0.0830189
MIR2467	0.0301887	0.113208	12.5016	0.000406603	0.0118778	0.0830189
LOC101928111	0.0301887	0.113208	12.5016	0.000406603	0.0118778	0.0830189
LOC150935	0.0264151	0.116981	14.9963	0.000107725	0.00834024	0.090566
NDUFA10	0.0264151	0.116981	14.9963	0.000107725	0.00834024	0.090566
MIR4786	0.0264151	0.113208	14.0628	0.000176804	0.0100224	0.0867925
OR6B2	0.0264151	0.113208	14.0628	0.000176804	0.0100224	0.0867925
OR6B3	0.0264151	0.113208	14.0628	0.000176804	0.0100224	0.0867925
COPS9	0.0264151	0.116981	14.9963	0.000107725	0.00834024	0.090566
OTOS	0.0264151	0.116981	14.9963	0.000107725	0.00834024	0.090566
GPC1	0.0264151	0.120755	15.9423	6.53013e-05	0.0073589	0.0943396
PP14571	0.0264151	0.120755	15.9423	6.53013e-05	0.0073589	0.0943396
MIR149	0.0264151	0.120755	15.9423	6.53013e-05	0.0073589	0.0943396
ANKMY1	0.0264151	0.120755	15.9423	6.53013e-05	0.0073589	0.0943396
DUSP28	0.0264151	0.120755	15.9423	6.53013e-05	0.0073589	0.0943396
RNPEPL1	0.0264151	0.120755	15.9423	6.53013e-05	0.0073589	0.0943396
CAPN10-AS1	0.0264151	0.120755	15.9423	6.53013e-05	0.0073589	0.0943396
CAPN10	0.0264151	0.120755	15.9423	6.53013e-05	0.0073589	0.0943396
GPR35	0.0264151	0.120755	15.9423	6.53013e-05	0.0073589	0.0943396
AQP12A	0.0264151	0.120755	15.9423	6.53013e-05	0.0073589	0.0943396
AQP12B	0.0264151	0.120755	15.9423	6.53013e-05	0.0073589	0.0943396
KIF1A	0.0264151	0.120755	15.9423	6.53013e-05	0.0073589	0.0943396
AGXT	0.0264151	0.116981	14.9963	0.000107725	0.00834024	0.090566
C2orf54	0.0264151	0.116981	14.9963	0.000107725	0.00834024	0.090566
LOC200772	0.0226415	0.116981	16.7359	4.29598e-05	0.00702163	0.0943396
SNED1	0.0226415	0.116981	16.7359	4.29598e-05	0.00702163	0.0943396
MTERF4	0.0226415	0.116981	16.7359	4.29598e-05	0.00702163	0.0943396
PASK	0.0226415	0.116981	16.7359	4.29598e-05	0.00702163	0.0943396
PPP1R7	0.0226415	0.116981	16.7359	4.29598e-05	0.00702163	0.0943396
ANO7	0.0226415	0.120755	17.7177	2.56232e-05	0.00607546	0.0981132
HDLBP	0.0226415	0.116981	16.7359	4.29598e-05	0.00702163	0.0943396
2022-09-02	0.0226415	0.120755	17.7177	2.56232e-05	0.00607546	0.0981132
FARP2	0.0226415	0.128302	19.7128	8.99987e-06	0.00607546	0.10566
MIR3133	0.0226415	0.124528	18.7101	1.52173e-05	0.00607546	0.101887
STK25	0.0226415	0.128302	19.7128	8.99987e-06	0.00607546	0.10566
ATG4B	0.0226415	0.120755	17.7177	2.56232e-05	0.00607546	0.0981132
BOK-AS1	0.0226415	0.120755	17.7177	2.56232e-05	0.00607546	0.0981132
BOK	0.0226415	0.120755	17.7177	2.56232e-05	0.00607546	0.0981132
D2HGDH	0.0226415	0.120755	17.7177	2.56232e-05	0.00607546	0.0981132
DTYMK	0.0226415	0.120755	17.7177	2.56232e-05	0.00607546	0.0981132
GAL3ST2	0.0226415	0.120755	17.7177	2.56232e-05	0.00607546	0.0981132
ING5	0.0226415	0.120755	17.7177	2.56232e-05	0.00607546	0.0981132
LINC01237	0.0226415	0.120755	17.7177	2.56232e-05	0.00607546	0.0981132
LOC102723927	0.0226415	0.120755	17.7177	2.56232e-05	0.00607546	0.0981132
LOC285095	0.0226415	0.120755	17.7177	2.56232e-05	0.00607546	0.0981132
LOC728323	0.0226415	0.120755	17.7177	2.56232e-05	0.00607546	0.0981132
NEU4	0.0226415	0.120755	17.7177	2.56232e-05	0.00607546	0.0981132
PDCD1	0.0226415	0.120755	17.7177	2.56232e-05	0.00607546	0.0981132
RTP5	0.0226415	0.120755	17.7177	2.56232e-05	0.00607546	0.0981132
THAP4	0.0226415	0.120755	17.7177	2.56232e-05	0.00607546	0.0981132
CHL1-AS1	0.0339623	0.0943396	7.07128	0.00783294	0.0490158	0.0603774
CHL1	0.0339623	0.0943396	7.07128	0.00783294	0.0490158	0.0603774
CNTN4-AS2	0.0339623	0.0943396	7.07128	0.00783294	0.0490158	0.0603774
CNTN4	0.045283	0.101887	5.42483	0.0198524	0.082036	0.0566038
CNTN6	0.0339623	0.0943396	7.07128	0.00783294	0.0490158	0.0603774
LINC01266	0.0339623	0.0943396	7.07128	0.00783294	0.0490158	0.0603774
LOC102723448	0.0339623	0.0943396	7.07128	0.00783294	0.0490158	0.0603774
CNTN4-AS1	0.0415094	0.0943396	5.03655	0.0248179	0.0928143	0.0528302
IL5RA	0.0415094	0.0943396	5.03655	0.0248179	0.0928143	0.0528302
TRNT1	0.0415094	0.0943396	5.03655	0.0248179	0.0928143	0.0528302
CRBN	0.0415094	0.0943396	5.03655	0.0248179	0.0928143	0.0528302
LRRN1	0.0377358	0.090566	5.31131	0.0211874	0.0860642	0.0528302
SETMAR	0.045283	0.0981132	4.79086	0.0286111	0.0994176	0.0528302
ITPR1	0.0528302	0.116981	6.21672	0.0126549	0.0646502	0.0641509
EGOT	0.0528302	0.116981	6.21672	0.0126549	0.0646502	0.0641509
BHLHE40-AS1	0.0490566	0.109434	5.81821	0.0158611	0.0731366	0.0603774
BHLHE40	0.045283	0.10566	6.08418	0.0136397	0.0676919	0.0603774
ARL8B	0.045283	0.0981132	4.79086	0.0286111	0.0994176	0.0528302
EDEM1	0.0415094	0.0981132	5.69486	0.0170146	0.0759623	0.0566038
MIR4790	0.0415094	0.0981132	5.69486	0.0170146	0.0759623	0.0566038
GRM7-AS3	0.0339623	0.0981132	7.83146	0.00513447	0.0376342	0.0641509
GRM7	0.0339623	0.0943396	7.07128	0.00783294	0.0490158	0.0603774
GRM7-AS2	0.0339623	0.0943396	7.07128	0.00783294	0.0490158	0.0603774
GRM7-AS1	0.0301887	0.0867925	6.71537	0.00955857	0.0549112	0.0566038
LOC101927394	0.0301887	0.0792453	5.25294	0.0219097	0.0860642	0.0490566
RAD18	0.0377358	0.090566	5.31131	0.0211874	0.0860642	0.0528302
SRGAP3-AS3	0.0377358	0.090566	5.31131	0.0211874	0.0860642	0.0528302
THUMPD3	0.0377358	0.0943396	5.99596	0.0143387	0.0687291	0.0566038
THUMPD3-AS1	0.0377358	0.0943396	5.99596	0.0143387	0.0687291	0.0566038
SETD5	0.0415094	0.0981132	5.69486	0.0170146	0.0759623	0.0566038
LHFPL4	0.0415094	0.0943396	5.03655	0.0248179	0.0928143	0.0528302
MTMR14	0.0415094	0.0981132	5.69486	0.0170146	0.0759623	0.0566038
CPNE9	0.0415094	0.0981132	5.69486	0.0170146	0.0759623	0.0566038
BRPF1	0.045283	0.0981132	4.79086	0.0286111	0.0994176	0.0528302
OGG1	0.045283	0.0981132	4.79086	0.0286111	0.0994176	0.0528302
CAMK1	0.045283	0.0981132	4.79086	0.0286111	0.0994176	0.0528302
ARPC4-TTLL3	0.045283	0.0981132	4.79086	0.0286111	0.0994176	0.0528302
ARPC4	0.045283	0.0981132	4.79086	0.0286111	0.0994176	0.0528302
TTLL3	0.045283	0.0981132	4.79086	0.0286111	0.0994176	0.0528302
RPUSD3	0.0415094	0.0981132	5.69486	0.0170146	0.0759623	0.0566038
CIDEC	0.0377358	0.0981132	6.70547	0.00961178	0.0549112	0.0603774
JAGN1	0.0377358	0.0981132	6.70547	0.00961178	0.0549112	0.0603774
IL17RE	0.0377358	0.0981132	6.70547	0.00961178	0.0549112	0.0603774
IL17RC	0.0377358	0.0981132	6.70547	0.00961178	0.0549112	0.0603774
CRELD1	0.0377358	0.0981132	6.70547	0.00961178	0.0549112	0.0603774
PRRT3-AS1	0.0377358	0.0981132	6.70547	0.00961178	0.0549112	0.0603774
PRRT3	0.0377358	0.0981132	6.70547	0.00961178	0.0549112	0.0603774
EMC3	0.0377358	0.0981132	6.70547	0.00961178	0.0549112	0.0603774
EMC3-AS1	0.0377358	0.0981132	6.70547	0.00961178	0.0549112	0.0603774
LOC401052	0.0377358	0.0981132	6.70547	0.00961178	0.0549112	0.0603774
CIDECP	0.0377358	0.0981132	6.70547	0.00961178	0.0549112	0.0603774
FANCD2	0.0415094	0.0981132	5.69486	0.0170146	0.0759623	0.0566038
FANCD2OS	0.0415094	0.0943396	5.03655	0.0248179	0.0928143	0.0528302
BRK1	0.0415094	0.0943396	5.03655	0.0248179	0.0928143	0.0528302
SLC6A11	0.0377358	0.090566	5.31131	0.0211874	0.0860642	0.0528302
SLC6A1	0.0377358	0.090566	5.31131	0.0211874	0.0860642	0.0528302
SLC6A1-AS1	0.0377358	0.090566	5.31131	0.0211874	0.0860642	0.0528302
HRH1	0.0377358	0.090566	5.31131	0.0211874	0.0860642	0.0528302
RAB5A	0.0264151	0.0716981	4.89393	0.0269513	0.094663	0.045283
ZNF385D-AS2	0.0226415	0.0679245	5.2808	0.0215619	0.0860642	0.045283
UBE2E2	0.0264151	0.0716981	4.89393	0.0269513	0.094663	0.045283
LOC105376997	0.0264151	0.0716981	4.89393	0.0269513	0.094663	0.045283
LRRC3B	0.0264151	0.0716981	4.89393	0.0269513	0.094663	0.045283
OR5H1	0.0113208	0.0528302	6.07728	0.0136931	0.0676919	0.0415094
OR5H14	0.0113208	0.0490566	5.22009	0.0223274	0.0860642	0.0377358
OR5H6	0.0113208	0.0490566	5.22009	0.0223274	0.0860642	0.0377358
OR5H2	0.0113208	0.0490566	5.22009	0.0223274	0.0860642	0.0377358
OR5K4	0.00754717	0.0490566	6.86084	0.00881051	0.0525999	0.0415094
OR5K3	0.00754717	0.0490566	6.86084	0.00881051	0.0525999	0.0415094
OR5K1	0.00754717	0.045283	5.94269	0.0147784	0.0689368	0.0377358
OR5K2	0.00754717	0.045283	5.94269	0.0147784	0.0689368	0.0377358
CLDND1	0.00754717	0.045283	5.94269	0.0147784	0.0689368	0.0377358
LOC152225	0.0188679	0.0679245	6.54489	0.0105186	0.0584845	0.0490566
LOC101929411	0.0188679	0.0603774	4.95837	0.0259647	0.0937181	0.0415094
ABHD10	0.00377358	0.0339623	4.99423	0.025432	0.0937181	0.0301887
TAGLN3	0.00377358	0.0339623	4.99423	0.025432	0.0937181	0.0301887
BTLA	0.00754717	0.0415094	5.04687	0.0246705	0.0928143	0.0339623
SLC35A5	0.00754717	0.0415094	5.04687	0.0246705	0.0928143	0.0339623
CCDC80	0.00754717	0.0415094	5.04687	0.0246705	0.0928143	0.0339623
LINC01279	0.00754717	0.0415094	5.04687	0.0246705	0.0928143	0.0339623
LOC101929694	0.00754717	0.045283	5.94269	0.0147784	0.0689368	0.0377358
CFAP44-AS1	0.00754717	0.0415094	5.04687	0.0246705	0.0928143	0.0339623
MIR8076	0.00754717	0.0415094	5.04687	0.0246705	0.0928143	0.0339623
SPICE1	0.00754717	0.0415094	5.04687	0.0246705	0.0928143	0.0339623
SIDT1	0.00754717	0.0415094	5.04687	0.0246705	0.0928143	0.0339623
MIR4446	0.00754717	0.0415094	5.04687	0.0246705	0.0928143	0.0339623
USF3	0.00377358	0.0415094	6.90637	0.00858892	0.052421	0.0377358
NAA50	0.00377358	0.0415094	6.90637	0.00858892	0.052421	0.0377358
ATP6V1A	0.00377358	0.0415094	6.90637	0.00858892	0.052421	0.0377358
GRAMD1C	0.00377358	0.0415094	6.90637	0.00858892	0.052421	0.0377358
ZDHHC23	0.00377358	0.0415094	6.90637	0.00858892	0.052421	0.0377358
CCDC191	0.00377358	0.0415094	6.90637	0.00858892	0.052421	0.0377358
QTRT2	0.00377358	0.045283	7.88573	0.00498263	0.0376342	0.0415094
DRD3	0.00377358	0.045283	7.88573	0.00498263	0.0376342	0.0415094
ZNF80	0.00377358	0.045283	7.88573	0.00498263	0.0376342	0.0415094
TIGIT	0.00377358	0.045283	7.88573	0.00498263	0.0376342	0.0415094
ZBTB20	0.0113208	0.0528302	6.07728	0.0136931	0.0676919	0.0415094
MIR568	0.00377358	0.045283	7.88573	0.00498263	0.0376342	0.0415094
ZBTB20-AS1	0.00377358	0.0415094	6.90637	0.00858892	0.052421	0.0377358
LOC101929754	0.00377358	0.0415094	6.90637	0.00858892	0.052421	0.0377358
MIR4796	0.00754717	0.0415094	5.04687	0.0246705	0.0928143	0.0339623
ZBTB20-AS3	0.00754717	0.0415094	5.04687	0.0246705	0.0928143	0.0339623
ZBTB20-AS4	0.00754717	0.045283	5.94269	0.0147784	0.0689368	0.0377358
GAP43	0.00754717	0.0415094	5.04687	0.0246705	0.0928143	0.0339623
LSAMP	0.00754717	0.0490566	6.86084	0.00881051	0.0525999	0.0415094
LSAMP-AS1	0.00754717	0.0415094	5.04687	0.0246705	0.0928143	0.0339623
TUSC7	0.00754717	0.045283	5.94269	0.0147784	0.0689368	0.0377358
MIR4447	0.00754717	0.045283	5.94269	0.0147784	0.0689368	0.0377358
LOC105374060	0.0150943	0.0641509	7.14005	0.0075381	0.0482275	0.0490566
LOC101926968	0.0150943	0.0641509	7.14005	0.0075381	0.0482275	0.0490566
IGSF11	0.0150943	0.0566038	5.45885	0.0194694	0.0816215	0.0415094
IGSF11-AS1	0.0150943	0.0566038	5.45885	0.0194694	0.0816215	0.0415094
C3orf30	0.0113208	0.0528302	6.07728	0.0136931	0.0676919	0.0415094
UPK1B	0.0113208	0.0528302	6.07728	0.0136931	0.0676919	0.0415094
B4GALT4	0.0113208	0.0566038	6.95855	0.00834196	0.0512266	0.045283
B4GALT4-AS1	0.0113208	0.0566038	6.95855	0.00834196	0.0512266	0.045283
ARHGAP31	0.0113208	0.0566038	6.95855	0.00834196	0.0512266	0.045283
ARHGAP31-AS1	0.0113208	0.0566038	6.95855	0.00834196	0.0512266	0.045283
TMEM39A	0.0113208	0.0566038	6.95855	0.00834196	0.0512266	0.045283
POGLUT1	0.0113208	0.0566038	6.95855	0.00834196	0.0512266	0.045283
TIMMDC1	0.0113208	0.0566038	6.95855	0.00834196	0.0512266	0.045283
CD80	0.0113208	0.0566038	6.95855	0.00834196	0.0512266	0.045283
ADPRH	0.0113208	0.0566038	6.95855	0.00834196	0.0512266	0.045283
PLA1A	0.0113208	0.0566038	6.95855	0.00834196	0.0512266	0.045283
POPDC2	0.0113208	0.0603774	7.86075	0.00505195	0.0376342	0.0490566
COX17	0.0113208	0.0603774	7.86075	0.00505195	0.0376342	0.0490566
MAATS1	0.0113208	0.0566038	6.95855	0.00834196	0.0512266	0.045283
NR1I2	0.0113208	0.0566038	6.95855	0.00834196	0.0512266	0.045283
GSK3B	0.0188679	0.0641509	5.73819	0.0165999	0.0747269	0.045283
GPR156	0.0113208	0.0603774	7.86075	0.00505195	0.0376342	0.0490566
LRRC58	0.0113208	0.0528302	6.07728	0.0136931	0.0676919	0.0415094
FSTL1	0.0113208	0.0528302	6.07728	0.0136931	0.0676919	0.0415094
MIR198	0.0113208	0.0528302	6.07728	0.0136931	0.0676919	0.0415094
NDUFB4	0.0113208	0.0528302	6.07728	0.0136931	0.0676919	0.0415094
HGD	0.0113208	0.0528302	6.07728	0.0136931	0.0676919	0.0415094
RABL3	0.0113208	0.0528302	6.07728	0.0136931	0.0676919	0.0415094
GTF2E1	0.0113208	0.0528302	6.07728	0.0136931	0.0676919	0.0415094
LOC101926983	0.0113208	0.0528302	6.07728	0.0136931	0.0676919	0.0415094
STXBP5L	0.0188679	0.0641509	5.73819	0.0165999	0.0747269	0.045283
MIR5682	0.0150943	0.0566038	5.45885	0.0194694	0.0816215	0.0415094
POLQ	0.0150943	0.0603774	6.28725	0.0121609	0.062619	0.045283
ARGFX	0.0150943	0.0566038	5.45885	0.0194694	0.0816215	0.0415094
FBXO40	0.0150943	0.0566038	5.45885	0.0194694	0.0816215	0.0415094
GOLGB1	0.0150943	0.0566038	5.45885	0.0194694	0.0816215	0.0415094
HCLS1	0.0150943	0.0566038	5.45885	0.0194694	0.0816215	0.0415094
IQCB1	0.0150943	0.0566038	5.45885	0.0194694	0.0816215	0.0415094
EAF2	0.0150943	0.0566038	5.45885	0.0194694	0.0816215	0.0415094
SLC15A2	0.0150943	0.0566038	5.45885	0.0194694	0.0816215	0.0415094
ILDR1	0.0150943	0.0566038	5.45885	0.0194694	0.0816215	0.0415094
CD86	0.0150943	0.0566038	5.45885	0.0194694	0.0816215	0.0415094
CASR	0.0150943	0.0566038	5.45885	0.0194694	0.0816215	0.0415094
PDIA5	0.0188679	0.0603774	4.95837	0.0259647	0.0937181	0.0415094
MIR7110	0.0150943	0.0603774	6.28725	0.0121609	0.062619	0.045283
SEC22A	0.0150943	0.0603774	6.28725	0.0121609	0.062619	0.045283
ADCY5	0.0150943	0.0603774	6.28725	0.0121609	0.062619	0.045283
KALRN	0.0150943	0.0603774	6.28725	0.0121609	0.062619	0.045283
MIR6083	0.0113208	0.0528302	6.07728	0.0136931	0.0676919	0.0415094
UMPS	0.0113208	0.0603774	7.86075	0.00505195	0.0376342	0.0490566
MIR544B	0.0113208	0.0603774	7.86075	0.00505195	0.0376342	0.0490566
ITGB5	0.0150943	0.0603774	6.28725	0.0121609	0.062619	0.045283
MUC13	0.0150943	0.0603774	6.28725	0.0121609	0.062619	0.045283
HEG1	0.0150943	0.0603774	6.28725	0.0121609	0.062619	0.045283
SLC12A8	0.0150943	0.0603774	6.28725	0.0121609	0.062619	0.045283
MIR5092	0.0150943	0.0603774	6.28725	0.0121609	0.062619	0.045283
ZNF148	0.0150943	0.0603774	6.28725	0.0121609	0.062619	0.045283
SNX4	0.0113208	0.0566038	6.95855	0.00834196	0.0512266	0.045283
OSBPL11	0.0113208	0.0566038	6.95855	0.00834196	0.0512266	0.045283
MIR548I1	0.0150943	0.0566038	5.45885	0.0194694	0.0816215	0.0415094
LOC101927056	0.0150943	0.0566038	5.45885	0.0194694	0.0816215	0.0415094
ALG1L	0.0150943	0.0566038	5.45885	0.0194694	0.0816215	0.0415094
FAM86JP	0.0150943	0.0566038	5.45885	0.0194694	0.0816215	0.0415094
ROPN1B	0.0150943	0.0566038	5.45885	0.0194694	0.0816215	0.0415094
SLC41A3	0.0150943	0.0566038	5.45885	0.0194694	0.0816215	0.0415094
ALDH1L1-AS1	0.0113208	0.0566038	6.95855	0.00834196	0.0512266	0.045283
ALDH1L1	0.0113208	0.0566038	6.95855	0.00834196	0.0512266	0.045283
ALDH1L1-AS2	0.0113208	0.0566038	6.95855	0.00834196	0.0512266	0.045283
KLF15	0.0113208	0.0566038	6.95855	0.00834196	0.0512266	0.045283
CCDC37-AS1	0.0113208	0.0566038	6.95855	0.00834196	0.0512266	0.045283
CFAP100	0.0150943	0.0566038	5.45885	0.0194694	0.0816215	0.0415094
ZXDC	0.0150943	0.0566038	5.45885	0.0194694	0.0816215	0.0415094
UROC1	0.0150943	0.0566038	5.45885	0.0194694	0.0816215	0.0415094
C3orf22	0.0150943	0.0566038	5.45885	0.0194694	0.0816215	0.0415094
CHST13	0.0150943	0.0566038	5.45885	0.0194694	0.0816215	0.0415094
TXNRD3NB	0.0150943	0.0566038	5.45885	0.0194694	0.0816215	0.0415094
CHCHD6	0.0188679	0.0603774	4.95837	0.0259647	0.0937181	0.0415094
PLXNA1	0.0150943	0.0641509	7.14005	0.0075381	0.0482275	0.0490566
C3orf56	0.0150943	0.0603774	6.28725	0.0121609	0.062619	0.045283
PODXL2	0.0188679	0.0603774	4.95837	0.0259647	0.0937181	0.0415094
ABTB1	0.0188679	0.0603774	4.95837	0.0259647	0.0937181	0.0415094
MGLL	0.0188679	0.0603774	4.95837	0.0259647	0.0937181	0.0415094
SEC61A1	0.0188679	0.0641509	5.73819	0.0165999	0.0747269	0.045283
RUVBL1	0.0188679	0.0641509	5.73819	0.0165999	0.0747269	0.045283
RUVBL1-AS1	0.0188679	0.0641509	5.73819	0.0165999	0.0747269	0.045283
EEFSEC	0.0150943	0.0641509	7.14005	0.0075381	0.0482275	0.0490566
hsa-mir-1280	0.0150943	0.0603774	6.28725	0.0121609	0.062619	0.045283
DNAJB8	0.0150943	0.0603774	6.28725	0.0121609	0.062619	0.045283
DNAJB8-AS1	0.0150943	0.0603774	6.28725	0.0121609	0.062619	0.045283
GATA2	0.0150943	0.0603774	6.28725	0.0121609	0.062619	0.045283
GATA2-AS1	0.0150943	0.0603774	6.28725	0.0121609	0.062619	0.045283
LOC90246	0.0150943	0.0603774	6.28725	0.0121609	0.062619	0.045283
LINC01565	0.0113208	0.0603774	7.86075	0.00505195	0.0376342	0.0490566
RPN1	0.0113208	0.0603774	7.86075	0.00505195	0.0376342	0.0490566
RAB7A	0.0113208	0.0641509	8.78137	0.00304322	0.0278209	0.0528302
LOC653712	0.0113208	0.0603774	7.86075	0.00505195	0.0376342	0.0490566
ACAD9	0.0113208	0.0641509	8.78137	0.00304322	0.0278209	0.0528302
KIAA1257	0.0113208	0.0679245	9.7184	0.00182432	0.0210979	0.0566038
EFCC1	0.0113208	0.0679245	9.7184	0.00182432	0.0210979	0.0566038
GP9	0.0113208	0.0679245	9.7184	0.00182432	0.0210979	0.0566038
ISY1-RAB43	0.0113208	0.0679245	9.7184	0.00182432	0.0210979	0.0566038
RAB43	0.0113208	0.0679245	9.7184	0.00182432	0.0210979	0.0566038
ISY1	0.0113208	0.0641509	8.78137	0.00304322	0.0278209	0.0528302
CNBP	0.0113208	0.0641509	8.78137	0.00304322	0.0278209	0.0528302
COPG1	0.0150943	0.0641509	7.14005	0.0075381	0.0482275	0.0490566
MIR6826	0.0150943	0.0603774	6.28725	0.0121609	0.062619	0.045283
HMCES	0.0150943	0.0603774	6.28725	0.0121609	0.062619	0.045283
H1FX-AS1	0.0150943	0.0603774	6.28725	0.0121609	0.062619	0.045283
H1FX	0.0150943	0.0603774	6.28725	0.0121609	0.062619	0.045283
RPL32P3	0.0150943	0.0603774	6.28725	0.0121609	0.062619	0.045283
SNORA7B	0.0150943	0.0603774	6.28725	0.0121609	0.062619	0.045283
EFCAB12	0.0150943	0.0603774	6.28725	0.0121609	0.062619	0.045283
MBD4	0.0150943	0.0603774	6.28725	0.0121609	0.062619	0.045283
IFT122	0.0150943	0.0603774	6.28725	0.0121609	0.062619	0.045283
RHO	0.0150943	0.0603774	6.28725	0.0121609	0.062619	0.045283
H1FOO	0.0150943	0.0603774	6.28725	0.0121609	0.062619	0.045283
PLXND1	0.0150943	0.0603774	6.28725	0.0121609	0.062619	0.045283
TMCC1	0.0150943	0.0603774	6.28725	0.0121609	0.062619	0.045283
TMCC1-AS1	0.0150943	0.0566038	5.45885	0.0194694	0.0816215	0.0415094
TRH	0.0150943	0.0566038	5.45885	0.0194694	0.0816215	0.0415094
ALG1L2	0.0150943	0.0566038	5.45885	0.0194694	0.0816215	0.0415094
FAM86HP	0.0150943	0.0566038	5.45885	0.0194694	0.0816215	0.0415094
COL6A4P2	0.0150943	0.0566038	5.45885	0.0194694	0.0816215	0.0415094
COL6A5	0.0113208	0.0566038	6.95855	0.00834196	0.0512266	0.045283
COL6A6	0.0113208	0.0528302	6.07728	0.0136931	0.0676919	0.0415094
PIK3R4	0.0113208	0.0528302	6.07728	0.0136931	0.0676919	0.0415094
ATP2C1	0.0113208	0.0528302	6.07728	0.0136931	0.0676919	0.0415094
ASTE1	0.00754717	0.0490566	6.86084	0.00881051	0.0525999	0.0415094
NEK11	0.00754717	0.0528302	7.79791	0.00523067	0.0376342	0.045283
LOC339874	0.00754717	0.0490566	6.86084	0.00881051	0.0525999	0.0415094
NUDT16P1	0.00754717	0.0490566	6.86084	0.00881051	0.0525999	0.0415094
NUDT16	0.00754717	0.0490566	6.86084	0.00881051	0.0525999	0.0415094
MRPL3	0.00754717	0.0490566	6.86084	0.00881051	0.0525999	0.0415094
SNORA58	0.00754717	0.0490566	6.86084	0.00881051	0.0525999	0.0415094
CPNE4	0.00754717	0.0528302	7.79791	0.00523067	0.0376342	0.045283
MIR5704	0.00754717	0.045283	5.94269	0.0147784	0.0689368	0.0377358
ACPP	0.00754717	0.045283	5.94269	0.0147784	0.0689368	0.0377358
DNAJC13	0.00754717	0.045283	5.94269	0.0147784	0.0689368	0.0377358
ACAD11	0.00754717	0.0415094	5.04687	0.0246705	0.0928143	0.0339623
NPHP3-ACAD11	0.00754717	0.0415094	5.04687	0.0246705	0.0928143	0.0339623
ACKR4	0.00754717	0.0415094	5.04687	0.0246705	0.0928143	0.0339623
UBA5	0.00754717	0.0415094	5.04687	0.0246705	0.0928143	0.0339623
NPHP3	0.00754717	0.0415094	5.04687	0.0246705	0.0928143	0.0339623
NPHP3-AS1	0.00754717	0.0415094	5.04687	0.0246705	0.0928143	0.0339623
TMEM108	0.00754717	0.0490566	6.86084	0.00881051	0.0525999	0.0415094
TMEM108-AS1	0.00754717	0.045283	5.94269	0.0147784	0.0689368	0.0377358
BFSP2	0.00754717	0.0490566	6.86084	0.00881051	0.0525999	0.0415094
BFSP2-AS1	0.00754717	0.0490566	6.86084	0.00881051	0.0525999	0.0415094
CDV3	0.00754717	0.045283	5.94269	0.0147784	0.0689368	0.0377358
TOPBP1	0.00754717	0.045283	5.94269	0.0147784	0.0689368	0.0377358
TF	0.00754717	0.045283	5.94269	0.0147784	0.0689368	0.0377358
SRPRB	0.00754717	0.045283	5.94269	0.0147784	0.0689368	0.0377358
RAB6B	0.00754717	0.045283	5.94269	0.0147784	0.0689368	0.0377358
C3orf36	0.00754717	0.045283	5.94269	0.0147784	0.0689368	0.0377358
SLCO2A1	0.00754717	0.045283	5.94269	0.0147784	0.0689368	0.0377358
LOC100507210	0.00754717	0.045283	5.94269	0.0147784	0.0689368	0.0377358
RYK	0.00754717	0.045283	5.94269	0.0147784	0.0689368	0.0377358
AMOTL2	0.00754717	0.045283	5.94269	0.0147784	0.0689368	0.0377358
MIR6827	0.00754717	0.045283	5.94269	0.0147784	0.0689368	0.0377358
MIR4788	0.00754717	0.045283	5.94269	0.0147784	0.0689368	0.0377358
ANAPC13	0.00754717	0.045283	5.94269	0.0147784	0.0689368	0.0377358
CEP63	0.00754717	0.045283	5.94269	0.0147784	0.0689368	0.0377358
KY	0.00754717	0.045283	5.94269	0.0147784	0.0689368	0.0377358
EPHB1	0.00754717	0.045283	5.94269	0.0147784	0.0689368	0.0377358
PPP2R3A	0.00754717	0.0490566	6.86084	0.00881051	0.0525999	0.0415094
MSL2	0.00754717	0.0490566	6.86084	0.00881051	0.0525999	0.0415094
PCCB	0.00754717	0.0490566	6.86084	0.00881051	0.0525999	0.0415094
STAG1	0.0113208	0.0528302	6.07728	0.0136931	0.0676919	0.0415094
SLC35G2	0.0113208	0.0490566	5.22009	0.0223274	0.0860642	0.0377358
NCK1-AS1	0.0113208	0.0490566	5.22009	0.0223274	0.0860642	0.0377358
NCK1	0.0113208	0.0490566	5.22009	0.0223274	0.0860642	0.0377358
IL20RB	0.0113208	0.0490566	5.22009	0.0223274	0.0860642	0.0377358
CLSTN2	0.0113208	0.0528302	6.07728	0.0136931	0.0676919	0.0415094
CLSTN2-AS1	0.0113208	0.0528302	6.07728	0.0136931	0.0676919	0.0415094
TRIM42	0.0113208	0.0490566	5.22009	0.0223274	0.0860642	0.0377358
SLC25A36	0.0113208	0.0490566	5.22009	0.0223274	0.0860642	0.0377358
SPSB4	0.0113208	0.0528302	6.07728	0.0136931	0.0676919	0.0415094
PXYLP1	0.0150943	0.0566038	5.45885	0.0194694	0.0816215	0.0415094
ZBTB38	0.0150943	0.0603774	6.28725	0.0121609	0.062619	0.045283
RASA2	0.0150943	0.0566038	5.45885	0.0194694	0.0816215	0.0415094
GK5	0.0113208	0.0490566	5.22009	0.0223274	0.0860642	0.0377358
PLS1	0.00754717	0.045283	5.94269	0.0147784	0.0689368	0.0377358
U2SURP	0.0113208	0.0490566	5.22009	0.0223274	0.0860642	0.0377358
CHST2	0.0113208	0.0490566	5.22009	0.0223274	0.0860642	0.0377358
SLC9A9-AS1	0.0113208	0.0490566	5.22009	0.0223274	0.0860642	0.0377358
SLC9A9	0.0150943	0.0566038	5.45885	0.0194694	0.0816215	0.0415094
C3orf58	0.00377358	0.0528302	9.87961	0.0016712	0.0210979	0.0490566
PLOD2	0.00377358	0.0377358	5.9415	0.0147885	0.0689368	0.0339623
PLSCR4	0.00377358	0.0377358	5.9415	0.0147885	0.0689368	0.0339623
PLSCR2	0.00377358	0.0377358	5.9415	0.0147885	0.0689368	0.0339623
PLSCR1	0.00377358	0.0377358	5.9415	0.0147885	0.0689368	0.0339623
PLSCR5	0.00377358	0.0415094	6.90637	0.00858892	0.052421	0.0377358
LOC101927866	0.00377358	0.045283	7.88573	0.00498263	0.0376342	0.0415094
ZIC4	0.00754717	0.0415094	5.04687	0.0246705	0.0928143	0.0339623
ZIC1	0.00754717	0.0415094	5.04687	0.0246705	0.0928143	0.0339623
LOC440982	0.00754717	0.0415094	5.04687	0.0246705	0.0928143	0.0339623
LOC100507461	0.00754717	0.045283	5.94269	0.0147784	0.0689368	0.0377358
USP46	0.00377358	0.0415094	6.90637	0.00858892	0.052421	0.0377358
USP46-AS1	0.00377358	0.0415094	6.90637	0.00858892	0.052421	0.0377358
DANCR	0.00377358	0.045283	7.88573	0.00498263	0.0376342	0.0415094
MIR4449	0.00377358	0.045283	7.88573	0.00498263	0.0376342	0.0415094
SNORA26	0.00377358	0.045283	7.88573	0.00498263	0.0376342	0.0415094
ERVMER34-1	0.00377358	0.045283	7.88573	0.00498263	0.0376342	0.0415094
LINC01618	0.00377358	0.045283	7.88573	0.00498263	0.0376342	0.0415094
RASL11B	0.00377358	0.045283	7.88573	0.00498263	0.0376342	0.0415094
SCFD2	0.00377358	0.0490566	8.87735	0.0028873	0.0273951	0.045283
FIP1L1	0	0.0490566	11.3555	0.000752268	0.0154644	0.0490566
LNX1	0	0.045283	10.3169	0.00131816	0.019159	0.045283
LNX1-AS1	0	0.045283	10.3169	0.00131816	0.019159	0.045283
LNX1-AS2	0	0.045283	10.3169	0.00131816	0.019159	0.045283
LOC100506444	0	0.045283	10.3169	0.00131816	0.019159	0.045283
RPL21P44	0	0.0415094	9.28359	0.00231216	0.0241513	0.0415094
CHIC2	0	0.0415094	9.28359	0.00231216	0.0241513	0.0415094
GSX2	0	0.0415094	9.28359	0.00231216	0.0241513	0.0415094
LOC339978	0.00377358	0.045283	7.88573	0.00498263	0.0376342	0.0415094
KIT	0.00377358	0.045283	7.88573	0.00498263	0.0376342	0.0415094
KDR	0	0.0528302	12.3989	0.000429576	0.0124042	0.0528302
SRD5A3	0	0.045283	10.3169	0.00131816	0.019159	0.045283
SRD5A3-AS1	0	0.045283	10.3169	0.00131816	0.019159	0.045283
TMEM165	0	0.045283	10.3169	0.00131816	0.019159	0.045283
CLOCK	0	0.0490566	11.3555	0.000752268	0.0154644	0.0490566
PDCL2	0	0.0490566	11.3555	0.000752268	0.0154644	0.0490566
NMU	0	0.0528302	12.3989	0.000429576	0.0124042	0.0528302
LOC644145	0	0.0528302	12.3989	0.000429576	0.0124042	0.0528302
EXOC1	0	0.0528302	12.3989	0.000429576	0.0124042	0.0528302
CEP135	0	0.0490566	11.3555	0.000752268	0.0154644	0.0490566
MIR7641-2|chr4	0	0.0490566	11.3555	0.000752268	0.0154644	0.0490566
KIAA1211	0	0.045283	10.3169	0.00131816	0.019159	0.045283
AASDH	0	0.045283	10.3169	0.00131816	0.019159	0.045283
PPAT	0	0.0415094	9.28359	0.00231216	0.0241513	0.0415094
PAICS	0	0.0415094	9.28359	0.00231216	0.0241513	0.0415094
SRP72	0	0.0415094	9.28359	0.00231216	0.0241513	0.0415094
ARL9	0	0.0415094	9.28359	0.00231216	0.0241513	0.0415094
THEGL	0	0.0415094	9.28359	0.00231216	0.0241513	0.0415094
HOPX	0	0.0377358	8.25577	0.00406227	0.0339673	0.0377358
SPINK2	0	0.0339623	7.23395	0.00715376	0.0478538	0.0339623
REST	0	0.0339623	7.23395	0.00715376	0.0478538	0.0339623
NOA1	0	0.0339623	7.23395	0.00715376	0.0478538	0.0339623
POLR2B	0	0.0415094	9.28359	0.00231216	0.0241513	0.0415094
IGFBP7	0	0.045283	10.3169	0.00131816	0.019159	0.045283
IGFBP7-AS1	0	0.0490566	11.3555	0.000752268	0.0154644	0.0490566
LOC101928851	0	0.045283	10.3169	0.00131816	0.019159	0.045283
LOC105377671	0	0.0490566	11.3555	0.000752268	0.0154644	0.0490566
LOC105377247	0	0.0415094	9.28359	0.00231216	0.0241513	0.0415094
LOC105377245	0	0.0415094	9.28359	0.00231216	0.0241513	0.0415094
MIR548AG1	0.00377358	0.0377358	5.9415	0.0147885	0.0689368	0.0339623
ADGRL3	0.00754717	0.0566038	8.75129	0.00309383	0.0278209	0.0490566
ADGRL3-AS1	0.00377358	0.0490566	8.87735	0.0028873	0.0273951	0.045283
EPHA5	0.0113208	0.0528302	6.07728	0.0136931	0.0676919	0.0415094
EPHA5-AS1	0.0113208	0.0490566	5.22009	0.0223274	0.0860642	0.0377358
MIR1269A	0.0113208	0.0566038	6.95855	0.00834196	0.0512266	0.045283
UBA6	0.0113208	0.0528302	6.07728	0.0136931	0.0676919	0.0415094
UBA6-AS1	0.0113208	0.0528302	6.07728	0.0136931	0.0676919	0.0415094
GNRHR	0.0113208	0.0528302	6.07728	0.0136931	0.0676919	0.0415094
TMPRSS11A	0.0150943	0.0641509	7.14005	0.0075381	0.0482275	0.0490566
LOC550113	0.0150943	0.0679245	8.0145	0.00464044	0.0367446	0.0528302
SYT14P1	0.0150943	0.0679245	8.0145	0.00464044	0.0367446	0.0528302
TMPRSS11F	0.0150943	0.0679245	8.0145	0.00464044	0.0367446	0.0528302
TMPRSS11GP	0.0150943	0.0679245	8.0145	0.00464044	0.0367446	0.0528302
FTLP10	0.0150943	0.0679245	8.0145	0.00464044	0.0367446	0.0528302
TMPRSS11BNL	0.0150943	0.0679245	8.0145	0.00464044	0.0367446	0.0528302
TMPRSS11B	0.0150943	0.0679245	8.0145	0.00464044	0.0367446	0.0528302
YTHDC1	0.0150943	0.0716981	8.90833	0.00283873	0.0271824	0.0566038
LOC105377267	0.0150943	0.0679245	8.0145	0.00464044	0.0367446	0.0528302
TMPRSS11E	0.0150943	0.0679245	8.0145	0.00464044	0.0367446	0.0528302
UGT2A3	0.0150943	0.0679245	8.0145	0.00464044	0.0367446	0.0528302
UGT2B10	0.0150943	0.0679245	8.0145	0.00464044	0.0367446	0.0528302
UGT2B11	0.0150943	0.0679245	8.0145	0.00464044	0.0367446	0.0528302
UGT2B15	0.0150943	0.0679245	8.0145	0.00464044	0.0367446	0.0528302
UGT2B17	0.0150943	0.0679245	8.0145	0.00464044	0.0367446	0.0528302
UGT2B28	0.0150943	0.0679245	8.0145	0.00464044	0.0367446	0.0528302
UGT2B7	0.0150943	0.0679245	8.0145	0.00464044	0.0367446	0.0528302
UGT2B4	0.0113208	0.0754717	11.6354	0.000647096	0.0140668	0.0641509
UGT2A1	0.0113208	0.0754717	11.6354	0.000647096	0.0140668	0.0641509
UGT2A2	0.0113208	0.0754717	11.6354	0.000647096	0.0140668	0.0641509
SULT1B1	0.0113208	0.0716981	10.6702	0.00108876	0.0167128	0.0603774
SULT1E1	0.0113208	0.0716981	10.6702	0.00108876	0.0167128	0.0603774
CSN1S1	0.0113208	0.0679245	9.7184	0.00182432	0.0210979	0.0566038
CSN2	0.0113208	0.0679245	9.7184	0.00182432	0.0210979	0.0566038
STATH	0.0188679	0.0641509	5.73819	0.0165999	0.0747269	0.045283
HTN3	0.0188679	0.0641509	5.73819	0.0165999	0.0747269	0.045283
HTN1	0.0188679	0.0641509	5.73819	0.0165999	0.0747269	0.045283
CSN1S2AP	0.0188679	0.0679245	6.54489	0.0105186	0.0584845	0.0490566
CSN1S2BP	0.0188679	0.0679245	6.54489	0.0105186	0.0584845	0.0490566
PRR27	0.0188679	0.0641509	5.73819	0.0165999	0.0747269	0.045283
ODAM	0.0188679	0.0679245	6.54489	0.0105186	0.0584845	0.0490566
FDCSP	0.0188679	0.0679245	6.54489	0.0105186	0.0584845	0.0490566
CSN3	0.0150943	0.0679245	8.0145	0.00464044	0.0367446	0.0528302
CABS1	0.0188679	0.0641509	5.73819	0.0165999	0.0747269	0.045283
SMR3A	0.0188679	0.0641509	5.73819	0.0165999	0.0747269	0.045283
SMR3B	0.0188679	0.0641509	5.73819	0.0165999	0.0747269	0.045283
OPRPN	0.0150943	0.0641509	7.14005	0.0075381	0.0482275	0.0490566
MUC7	0.0113208	0.0641509	8.78137	0.00304322	0.0278209	0.0528302
AMTN	0.0113208	0.0679245	9.7184	0.00182432	0.0210979	0.0566038
AMBN	0.0113208	0.0716981	10.6702	0.00108876	0.0167128	0.0603774
ENAM	0.0113208	0.0716981	10.6702	0.00108876	0.0167128	0.0603774
JCHAIN	0.0113208	0.0716981	10.6702	0.00108876	0.0167128	0.0603774
UTP3	0.0113208	0.0716981	10.6702	0.00108876	0.0167128	0.0603774
RUFY3	0.0150943	0.0716981	8.90833	0.00283873	0.0271824	0.0566038
GRSF1	0.0150943	0.0716981	8.90833	0.00283873	0.0271824	0.0566038
MOB1B	0.0188679	0.0679245	6.54489	0.0105186	0.0584845	0.0490566
DCK	0.0188679	0.0716981	7.37566	0.00661126	0.0443847	0.0528302
SLC4A4	0.0150943	0.0716981	8.90833	0.00283873	0.0271824	0.0566038
GC	0.0150943	0.0716981	8.90833	0.00283873	0.0271824	0.0566038
NPFFR2	0.0150943	0.0754717	9.81966	0.00172656	0.0210979	0.0603774
ADAMTS3	0.0150943	0.0830189	11.6888	0.000628775	0.0140168	0.0679245
COX18	0.0150943	0.0830189	11.6888	0.000628775	0.0140168	0.0679245
ANKRD17	0.0150943	0.0830189	11.6888	0.000628775	0.0140168	0.0679245
ALB	0.0150943	0.0867925	12.6441	0.000376746	0.0115529	0.0716981
AFP	0.0150943	0.0830189	11.6888	0.000628775	0.0140168	0.0679245
AFM	0.0150943	0.0830189	11.6888	0.000628775	0.0140168	0.0679245
LOC728040	0.0150943	0.0830189	11.6888	0.000628775	0.0140168	0.0679245
RASSF6	0.0150943	0.0830189	11.6888	0.000628775	0.0140168	0.0679245
CXCL8	0.0150943	0.0867925	12.6441	0.000376746	0.0115529	0.0716981
CXCL6	0.0150943	0.0792453	10.7469	0.00104452	0.0167128	0.0641509
PF4V1	0.0150943	0.0792453	10.7469	0.00104452	0.0167128	0.0641509
CXCL1	0.0150943	0.0792453	10.7469	0.00104452	0.0167128	0.0641509
PF4	0.0150943	0.0792453	10.7469	0.00104452	0.0167128	0.0641509
PPBP	0.0150943	0.0792453	10.7469	0.00104452	0.0167128	0.0641509
CXCL5	0.0150943	0.0792453	10.7469	0.00104452	0.0167128	0.0641509
CXCL3	0.0150943	0.0792453	10.7469	0.00104452	0.0167128	0.0641509
PPBPP2	0.0150943	0.0792453	10.7469	0.00104452	0.0167128	0.0641509
CXCL2	0.0150943	0.0792453	10.7469	0.00104452	0.0167128	0.0641509
MTHFD2L	0.0188679	0.0792453	9.10027	0.00255571	0.0258821	0.0603774
EPGN	0.0188679	0.0792453	9.10027	0.00255571	0.0258821	0.0603774
EREG	0.0188679	0.0792453	9.10027	0.00255571	0.0258821	0.0603774
AREG	0.0188679	0.0792453	9.10027	0.00255571	0.0258821	0.0603774
BTC	0.0150943	0.0867925	12.6441	0.000376746	0.0115529	0.0716981
PARM1	0.0150943	0.0830189	11.6888	0.000628775	0.0140168	0.0679245
LOC100507388	0.0150943	0.0830189	11.6888	0.000628775	0.0140168	0.0679245
LOC441025	0.0150943	0.0830189	11.6888	0.000628775	0.0140168	0.0679245
RCHY1	0.0150943	0.0830189	11.6888	0.000628775	0.0140168	0.0679245
THAP6	0.0150943	0.0830189	11.6888	0.000628775	0.0140168	0.0679245
C4orf26	0.0150943	0.0830189	11.6888	0.000628775	0.0140168	0.0679245
CDKL2	0.0188679	0.0867925	10.8971	0.000963136	0.0162441	0.0679245
G3BP2	0.0188679	0.0867925	10.8971	0.000963136	0.0162441	0.0679245
USO1	0.0150943	0.0867925	12.6441	0.000376746	0.0115529	0.0716981
PPEF2	0.0150943	0.0867925	12.6441	0.000376746	0.0115529	0.0716981
NAAA	0.0150943	0.0867925	12.6441	0.000376746	0.0115529	0.0716981
SDAD1	0.0150943	0.0867925	12.6441	0.000376746	0.0115529	0.0716981
LOC101928809	0.0150943	0.0830189	11.6888	0.000628775	0.0140168	0.0679245
CXCL9	0.0113208	0.0830189	13.6016	0.000225995	0.0100224	0.0716981
ART3	0.0113208	0.0830189	13.6016	0.000225995	0.0100224	0.0716981
CXCL10	0.0113208	0.0830189	13.6016	0.000225995	0.0100224	0.0716981
CXCL11	0.0113208	0.0830189	13.6016	0.000225995	0.0100224	0.0716981
NUP54	0.0113208	0.0830189	13.6016	0.000225995	0.0100224	0.0716981
SCARB2	0.0113208	0.0830189	13.6016	0.000225995	0.0100224	0.0716981
FAM47E	0.0113208	0.0867925	14.6009	0.000132852	0.00834024	0.0754717
FAM47E-STBD1	0.0113208	0.0867925	14.6009	0.000132852	0.00834024	0.0754717
STBD1	0.0113208	0.0830189	13.6016	0.000225995	0.0100224	0.0716981
CCDC158	0.0113208	0.0830189	13.6016	0.000225995	0.0100224	0.0716981
SHROOM3	0.0150943	0.0792453	10.7469	0.00104452	0.0167128	0.0641509
MIR4450	0.0113208	0.0754717	11.6354	0.000647096	0.0140668	0.0641509
MIR548AH	0.0113208	0.0754717	11.6354	0.000647096	0.0140668	0.0641509
SOWAHB	0.0150943	0.0679245	8.0145	0.00464044	0.0367446	0.0528302
2022-09-11	0.0150943	0.0792453	10.7469	0.00104452	0.0167128	0.0641509
CCNI	0.0150943	0.0792453	10.7469	0.00104452	0.0167128	0.0641509
CCNG2	0.0150943	0.0792453	10.7469	0.00104452	0.0167128	0.0641509
CXCL13	0.0188679	0.0830189	9.99043	0.00157356	0.0210034	0.0641509
CNOT6L	0.0188679	0.0754717	8.22812	0.00412463	0.0342135	0.0566038
MRPL1	0.0188679	0.0754717	8.22812	0.00412463	0.0342135	0.0566038
FRAS1	0.0188679	0.0641509	5.73819	0.0165999	0.0747269	0.045283
GPAT3	0.0113208	0.0490566	5.22009	0.0223274	0.0860642	0.0377358
LOC101928978	0.00754717	0.0490566	6.86084	0.00881051	0.0525999	0.0415094
NKX6-1	0.00754717	0.0528302	7.79791	0.00523067	0.0376342	0.045283
CDS1	0.00754717	0.0528302	7.79791	0.00523067	0.0376342	0.045283
WDFY3	0.00754717	0.0528302	7.79791	0.00523067	0.0376342	0.045283
WDFY3-AS2	0.00754717	0.0528302	7.79791	0.00523067	0.0376342	0.045283
ARHGAP24	0.00754717	0.0566038	8.75129	0.00309383	0.0278209	0.0490566
MIR4451	0.00754717	0.0490566	6.86084	0.00881051	0.0525999	0.0415094
MIR4452	0.0113208	0.0490566	5.22009	0.0223274	0.0860642	0.0377358
SLC10A6	0.0113208	0.0528302	6.07728	0.0136931	0.0676919	0.0415094
C4orf36	0.0113208	0.0528302	6.07728	0.0136931	0.0676919	0.0415094
LOC100506746	0.0113208	0.0528302	6.07728	0.0136931	0.0676919	0.0415094
AFF1	0.0113208	0.0566038	6.95855	0.00834196	0.0512266	0.045283
KLHL8	0.0113208	0.0566038	6.95855	0.00834196	0.0512266	0.045283
MIR5705	0.0113208	0.0528302	6.07728	0.0136931	0.0676919	0.0415094
HSD17B13	0.0113208	0.0528302	6.07728	0.0136931	0.0676919	0.0415094
HSD17B11	0.00754717	0.0528302	7.79791	0.00523067	0.0376342	0.045283
NUDT9	0.00754717	0.0566038	8.75129	0.00309383	0.0278209	0.0490566
SPARCL1	0.00754717	0.0566038	8.75129	0.00309383	0.0278209	0.0490566
DSPP	0.00754717	0.0566038	8.75129	0.00309383	0.0278209	0.0490566
DMP1	0.0113208	0.0566038	6.95855	0.00834196	0.0512266	0.045283
IBSP	0.0113208	0.0490566	5.22009	0.0223274	0.0860642	0.0377358
MEPE	0.0113208	0.0490566	5.22009	0.0223274	0.0860642	0.0377358
GPRIN3	0.0113208	0.0528302	6.07728	0.0136931	0.0676919	0.0415094
SNCA	0.0113208	0.0528302	6.07728	0.0136931	0.0676919	0.0415094
SNCA-AS1	0.0113208	0.0528302	6.07728	0.0136931	0.0676919	0.0415094
MMRN1	0.0113208	0.0566038	6.95855	0.00834196	0.0512266	0.045283
CCSER1	0.0150943	0.0830189	11.6888	0.000628775	0.0140168	0.0679245
LOC101929194	0.0113208	0.0603774	7.86075	0.00505195	0.0376342	0.0490566
GRID2	0.0226415	0.0754717	6.83532	0.00893728	0.0526552	0.0528302
ATOH1	0.0113208	0.0603774	7.86075	0.00505195	0.0376342	0.0490566
LOC101929210	0.0113208	0.0603774	7.86075	0.00505195	0.0376342	0.0490566
SMARCAD1	0.0113208	0.0603774	7.86075	0.00505195	0.0376342	0.0490566
HPGDS	0.0113208	0.0603774	7.86075	0.00505195	0.0376342	0.0490566
PDLIM5	0.0150943	0.0641509	7.14005	0.0075381	0.0482275	0.0490566
BMPR1B-AS1	0.0113208	0.0603774	7.86075	0.00505195	0.0376342	0.0490566
BMPR1B	0.0113208	0.0716981	10.6702	0.00108876	0.0167128	0.0603774
UNC5C	0.0150943	0.0754717	9.81966	0.00172656	0.0210979	0.0603774
PDHA2	0.0113208	0.0603774	7.86075	0.00505195	0.0376342	0.0490566
STPG2-AS1	0.00754717	0.0641509	10.6994	0.00107173	0.0167128	0.0566038
STPG2	0.0113208	0.0679245	9.7184	0.00182432	0.0210979	0.0566038
RAP1GDS1	0.0113208	0.0566038	6.95855	0.00834196	0.0512266	0.045283
TSPAN5	0.0113208	0.0603774	7.86075	0.00505195	0.0376342	0.0490566
EIF4E	0.0113208	0.0603774	7.86075	0.00505195	0.0376342	0.0490566
METAP1	0.0113208	0.0603774	7.86075	0.00505195	0.0376342	0.0490566
MIR3684	0.0113208	0.0603774	7.86075	0.00505195	0.0376342	0.0490566
ADH5	0.00754717	0.0603774	9.71897	0.00182376	0.0210979	0.0528302
LOC100507053	0.00754717	0.0603774	9.71897	0.00182376	0.0210979	0.0528302
ADH4	0.00754717	0.0566038	8.75129	0.00309383	0.0278209	0.0490566
PCNAP1	0.00754717	0.0566038	8.75129	0.00309383	0.0278209	0.0490566
ADH6	0.00754717	0.0566038	8.75129	0.00309383	0.0278209	0.0490566
ADH1A	0.00754717	0.0566038	8.75129	0.00309383	0.0278209	0.0490566
ADH1B	0.00754717	0.0566038	8.75129	0.00309383	0.0278209	0.0490566
ADH1C	0.0113208	0.0603774	7.86075	0.00505195	0.0376342	0.0490566
ADH7	0.00754717	0.0603774	9.71897	0.00182376	0.0210979	0.0528302
C4orf17	0.00754717	0.0603774	9.71897	0.00182376	0.0210979	0.0528302
TRMT10A	0.00754717	0.0603774	9.71897	0.00182376	0.0210979	0.0528302
MTTP	0.00754717	0.0603774	9.71897	0.00182376	0.0210979	0.0528302
DAPP1	0.00754717	0.0603774	9.71897	0.00182376	0.0210979	0.0528302
LAMTOR3	0.00754717	0.0603774	9.71897	0.00182376	0.0210979	0.0528302
DNAJB14	0.00754717	0.0603774	9.71897	0.00182376	0.0210979	0.0528302
H2AFZ	0.00754717	0.0603774	9.71897	0.00182376	0.0210979	0.0528302
LOC256880	0.00754717	0.0603774	9.71897	0.00182376	0.0210979	0.0528302
DDIT4L	0.00754717	0.0603774	9.71897	0.00182376	0.0210979	0.0528302
LOC101929353	0.00754717	0.0603774	9.71897	0.00182376	0.0210979	0.0528302
EMCN	0.00754717	0.0603774	9.71897	0.00182376	0.0210979	0.0528302
SNORA101A	0.00754717	0.0603774	9.71897	0.00182376	0.0210979	0.0528302
LINC01216	0.00754717	0.0566038	8.75129	0.00309383	0.0278209	0.0490566
PPP3CA	0.0113208	0.0641509	8.78137	0.00304322	0.0278209	0.0528302
MIR8066	0.00754717	0.0641509	10.6994	0.00107173	0.0167128	0.0566038
MIR1255A	0.00754717	0.0603774	9.71897	0.00182376	0.0210979	0.0528302
FLJ20021	0.00754717	0.0603774	9.71897	0.00182376	0.0210979	0.0528302
BANK1	0.00754717	0.0528302	7.79791	0.00523067	0.0376342	0.045283
SLC39A8	0.00754717	0.0528302	7.79791	0.00523067	0.0376342	0.045283
LOC105377621	0.0113208	0.0528302	6.07728	0.0136931	0.0676919	0.0415094
NFKB1	0.0113208	0.0566038	6.95855	0.00834196	0.0512266	0.045283
MANBA	0.00754717	0.0528302	7.79791	0.00523067	0.0376342	0.045283
LOC102723704	0.00754717	0.0528302	7.79791	0.00523067	0.0376342	0.045283
UBE2D3	0.00754717	0.0528302	7.79791	0.00523067	0.0376342	0.045283
LOC105377348	0.00754717	0.0528302	7.79791	0.00523067	0.0376342	0.045283
CISD2	0.00754717	0.0528302	7.79791	0.00523067	0.0376342	0.045283
SLC9B1	0.00754717	0.0528302	7.79791	0.00523067	0.0376342	0.045283
SLC9B2	0.00754717	0.0528302	7.79791	0.00523067	0.0376342	0.045283
BDH2	0.00754717	0.0528302	7.79791	0.00523067	0.0376342	0.045283
CENPE	0.00754717	0.0566038	8.75129	0.00309383	0.0278209	0.0490566
LOC101929448	0.00754717	0.0566038	8.75129	0.00309383	0.0278209	0.0490566
TACR3	0.0113208	0.0566038	6.95855	0.00834196	0.0512266	0.045283
CXXC4	0.0113208	0.0566038	6.95855	0.00834196	0.0512266	0.045283
LOC101929468	0.0113208	0.0566038	6.95855	0.00834196	0.0512266	0.045283
TET2	0.0150943	0.0603774	6.28725	0.0121609	0.062619	0.045283
TET2-AS1	0.0150943	0.0603774	6.28725	0.0121609	0.062619	0.045283
PPA2	0.0150943	0.0603774	6.28725	0.0121609	0.062619	0.045283
ARHGEF38	0.0150943	0.0641509	7.14005	0.0075381	0.0482275	0.0490566
ARHGEF38-IT1	0.0150943	0.0641509	7.14005	0.0075381	0.0482275	0.0490566
INTS12	0.0150943	0.0641509	7.14005	0.0075381	0.0482275	0.0490566
GSTCD	0.0150943	0.0641509	7.14005	0.0075381	0.0482275	0.0490566
LOC101929529	0.0150943	0.0603774	6.28725	0.0121609	0.062619	0.045283
NPNT	0.0113208	0.0603774	7.86075	0.00505195	0.0376342	0.0490566
LOC101929577	0.0113208	0.0641509	8.78137	0.00304322	0.0278209	0.0528302
TBCK	0.0113208	0.0641509	8.78137	0.00304322	0.0278209	0.0528302
AIMP1	0.0113208	0.0603774	7.86075	0.00505195	0.0376342	0.0490566
GIMD1	0.0113208	0.0603774	7.86075	0.00505195	0.0376342	0.0490566
DKK2	0.0113208	0.0566038	6.95855	0.00834196	0.0512266	0.045283
PAPSS1	0.0113208	0.0566038	6.95855	0.00834196	0.0512266	0.045283
SGMS2	0.0113208	0.0603774	7.86075	0.00505195	0.0376342	0.0490566
LOC101929595	0.0113208	0.0603774	7.86075	0.00505195	0.0376342	0.0490566
CYP2U1	0.0113208	0.0603774	7.86075	0.00505195	0.0376342	0.0490566
HADH	0.0113208	0.0603774	7.86075	0.00505195	0.0376342	0.0490566
LEF1	0.0113208	0.0641509	8.78137	0.00304322	0.0278209	0.0528302
LEF1-AS1	0.0113208	0.0603774	7.86075	0.00505195	0.0376342	0.0490566
RPL34-AS1	0.0113208	0.0528302	6.07728	0.0136931	0.0676919	0.0415094
LOC101929621	0.0113208	0.0528302	6.07728	0.0136931	0.0676919	0.0415094
RPL34	0.0113208	0.0528302	6.07728	0.0136931	0.0676919	0.0415094
OSTC	0.0113208	0.0528302	6.07728	0.0136931	0.0676919	0.0415094
ETNPPL	0.0113208	0.0490566	5.22009	0.0223274	0.0860642	0.0377358
CASP6	0.00754717	0.0415094	5.04687	0.0246705	0.0928143	0.0339623
PLA2G12A	0.00754717	0.0415094	5.04687	0.0246705	0.0928143	0.0339623
CFI	0.00754717	0.0415094	5.04687	0.0246705	0.0928143	0.0339623
GAR1	0.00754717	0.0415094	5.04687	0.0246705	0.0928143	0.0339623
RRH	0.00754717	0.0415094	5.04687	0.0246705	0.0928143	0.0339623
LRIT3	0.00754717	0.0415094	5.04687	0.0246705	0.0928143	0.0339623
EGF	0.00754717	0.0415094	5.04687	0.0246705	0.0928143	0.0339623
ELOVL6	0.00754717	0.0415094	5.04687	0.0246705	0.0928143	0.0339623
ENPEP	0.00754717	0.0415094	5.04687	0.0246705	0.0928143	0.0339623
PITX2	0.00754717	0.0415094	5.04687	0.0246705	0.0928143	0.0339623
MIR297	0.00754717	0.0415094	5.04687	0.0246705	0.0928143	0.0339623
C4orf32	0.00754717	0.0415094	5.04687	0.0246705	0.0928143	0.0339623
AP1AR	0.00754717	0.0415094	5.04687	0.0246705	0.0928143	0.0339623
TIFA	0.00754717	0.0415094	5.04687	0.0246705	0.0928143	0.0339623
ALPK1	0.00754717	0.0415094	5.04687	0.0246705	0.0928143	0.0339623
NEUROG2	0.00754717	0.0415094	5.04687	0.0246705	0.0928143	0.0339623
ZGRF1	0.00754717	0.0415094	5.04687	0.0246705	0.0928143	0.0339623
LARP7	0.00754717	0.0415094	5.04687	0.0246705	0.0928143	0.0339623
MIR302A	0.00754717	0.0415094	5.04687	0.0246705	0.0928143	0.0339623
MIR302B	0.00754717	0.0415094	5.04687	0.0246705	0.0928143	0.0339623
MIR302C	0.00754717	0.0415094	5.04687	0.0246705	0.0928143	0.0339623
MIR302D	0.00754717	0.0415094	5.04687	0.0246705	0.0928143	0.0339623
MIR367	0.00754717	0.0415094	5.04687	0.0246705	0.0928143	0.0339623
MIR1243	0.00754717	0.0415094	5.04687	0.0246705	0.0928143	0.0339623
MIR8082	0.00754717	0.0415094	5.04687	0.0246705	0.0928143	0.0339623
UGT8	0.00754717	0.0490566	6.86084	0.00881051	0.0525999	0.0415094
MIR577	0.00754717	0.0490566	6.86084	0.00881051	0.0525999	0.0415094
NDST4	0.00754717	0.045283	5.94269	0.0147784	0.0689368	0.0377358
MIR1973	0.0113208	0.0528302	6.07728	0.0136931	0.0676919	0.0415094
LINC01378	0.0113208	0.0490566	5.22009	0.0223274	0.0860642	0.0377358
SYNPO2	0.00754717	0.0415094	5.04687	0.0246705	0.0928143	0.0339623
LOC101927359	0.00754717	0.0415094	5.04687	0.0246705	0.0928143	0.0339623
PCDH10	0.00754717	0.0415094	5.04687	0.0246705	0.0928143	0.0339623
PABPC4L	0.00377358	0.0377358	5.9415	0.0147885	0.0689368	0.0339623
TBC1D9	0.0113208	0.0490566	5.22009	0.0223274	0.0860642	0.0377358
TNRC18P1	0.0113208	0.0490566	5.22009	0.0223274	0.0860642	0.0377358
RNF150	0.0113208	0.0528302	6.07728	0.0136931	0.0676919	0.0415094
ZNF330	0.00754717	0.0490566	6.86084	0.00881051	0.0525999	0.0415094
LOC100507639	0.00754717	0.0490566	6.86084	0.00881051	0.0525999	0.0415094
IL15	0.00754717	0.0528302	7.79791	0.00523067	0.0376342	0.045283
INPP4B	0.00754717	0.0566038	8.75129	0.00309383	0.0278209	0.0490566
LOC105377623	0.00754717	0.0603774	9.71897	0.00182376	0.0210979	0.0528302
USP38	0.0113208	0.0603774	7.86075	0.00505195	0.0376342	0.0490566
GAB1	0.0113208	0.0641509	8.78137	0.00304322	0.0278209	0.0528302
MIR3139	0.0113208	0.0641509	8.78137	0.00304322	0.0278209	0.0528302
SMARCA5-AS1	0.0113208	0.0603774	7.86075	0.00505195	0.0376342	0.0490566
SMARCA5	0.0113208	0.0603774	7.86075	0.00505195	0.0376342	0.0490566
GUSBP5	0.0113208	0.0603774	7.86075	0.00505195	0.0376342	0.0490566
FREM3	0.0150943	0.0641509	7.14005	0.0075381	0.0482275	0.0490566
LOC105377458	0.0188679	0.0679245	6.54489	0.0105186	0.0584845	0.0490566
GYPA	0.0113208	0.0641509	8.78137	0.00304322	0.0278209	0.0528302
GYPB	0.0113208	0.0641509	8.78137	0.00304322	0.0278209	0.0528302
GYPE	0.0113208	0.0641509	8.78137	0.00304322	0.0278209	0.0528302
LOC101927636	0.0113208	0.0641509	8.78137	0.00304322	0.0278209	0.0528302
HHIP-AS1	0.0113208	0.0566038	6.95855	0.00834196	0.0512266	0.045283
HHIP	0.0113208	0.0566038	6.95855	0.00834196	0.0512266	0.045283
ZNF827	0.0150943	0.0566038	5.45885	0.0194694	0.0816215	0.0415094
LSM6	0.0150943	0.0566038	5.45885	0.0194694	0.0816215	0.0415094
SLC10A7	0.0150943	0.0603774	6.28725	0.0121609	0.062619	0.045283
MIR7849	0.0150943	0.0603774	6.28725	0.0121609	0.062619	0.045283
POU4F2	0.0150943	0.0566038	5.45885	0.0194694	0.0816215	0.0415094
TTC29	0.0150943	0.0603774	6.28725	0.0121609	0.062619	0.045283
MIR548G	0.0150943	0.0566038	5.45885	0.0194694	0.0816215	0.0415094
EDNRA	0.0150943	0.0566038	5.45885	0.0194694	0.0816215	0.0415094
TMEM184C	0.0150943	0.0566038	5.45885	0.0194694	0.0816215	0.0415094
PRMT9	0.0150943	0.0603774	6.28725	0.0121609	0.062619	0.045283
ARHGAP10	0.0150943	0.0641509	7.14005	0.0075381	0.0482275	0.0490566
MIR4799	0.0150943	0.0603774	6.28725	0.0121609	0.062619	0.045283
NR3C2	0.0188679	0.0603774	4.95837	0.0259647	0.0937181	0.0415094
LOC105377480	0.0150943	0.0603774	6.28725	0.0121609	0.062619	0.045283
LOC101927849	0.0150943	0.0603774	6.28725	0.0121609	0.062619	0.045283
LRBA	0.0150943	0.0603774	6.28725	0.0121609	0.062619	0.045283
RPS3A	0.0150943	0.0566038	5.45885	0.0194694	0.0816215	0.0415094
SNORD73A	0.0150943	0.0566038	5.45885	0.0194694	0.0816215	0.0415094
SH3D19	0.0150943	0.0566038	5.45885	0.0194694	0.0816215	0.0415094
PRSS48	0.0113208	0.0528302	6.07728	0.0136931	0.0676919	0.0415094
FAM160A1	0.0113208	0.0528302	6.07728	0.0136931	0.0676919	0.0415094
LOC100996286	0.0113208	0.0528302	6.07728	0.0136931	0.0676919	0.0415094
FBXW7	0.0113208	0.0566038	6.95855	0.00834196	0.0512266	0.045283
DEAR	0.0113208	0.0528302	6.07728	0.0136931	0.0676919	0.0415094
MIR3140	0.0113208	0.0566038	6.95855	0.00834196	0.0512266	0.045283
DKFZP434I0714	0.0113208	0.0566038	6.95855	0.00834196	0.0512266	0.045283
MIR4453	0.0113208	0.0566038	6.95855	0.00834196	0.0512266	0.045283
TMEM154	0.0113208	0.0603774	7.86075	0.00505195	0.0376342	0.0490566
TIGD4	0.0150943	0.0603774	6.28725	0.0121609	0.062619	0.045283
ARFIP1	0.0150943	0.0603774	6.28725	0.0121609	0.062619	0.045283
LOC729870	0.0113208	0.0603774	7.86075	0.00505195	0.0376342	0.0490566
FHDC1	0.0150943	0.0641509	7.14005	0.0075381	0.0482275	0.0490566
TRIM2	0.0113208	0.0679245	9.7184	0.00182432	0.0210979	0.0566038
ANXA2P1	0.0113208	0.0679245	9.7184	0.00182432	0.0210979	0.0566038
MND1	0.0113208	0.0641509	8.78137	0.00304322	0.0278209	0.0528302
KIAA0922	0.0113208	0.0679245	9.7184	0.00182432	0.0210979	0.0566038
LOC100419170	0.0113208	0.0641509	8.78137	0.00304322	0.0278209	0.0528302
TLR2	0.0113208	0.0641509	8.78137	0.00304322	0.0278209	0.0528302
RNF175	0.0113208	0.0641509	8.78137	0.00304322	0.0278209	0.0528302
SFRP2	0.00754717	0.0641509	10.6994	0.00107173	0.0167128	0.0566038
DCHS2	0.00754717	0.0641509	10.6994	0.00107173	0.0167128	0.0566038
PLRG1	0.0113208	0.0603774	7.86075	0.00505195	0.0376342	0.0490566
FGB	0.0113208	0.0603774	7.86075	0.00505195	0.0376342	0.0490566
FGA	0.0113208	0.0603774	7.86075	0.00505195	0.0376342	0.0490566
FGG	0.0113208	0.0603774	7.86075	0.00505195	0.0376342	0.0490566
LRAT	0.00754717	0.0603774	9.71897	0.00182376	0.0210979	0.0528302
RBM46	0.00754717	0.0641509	10.6994	0.00107173	0.0167128	0.0566038
NPY2R	0.0113208	0.0641509	8.78137	0.00304322	0.0278209	0.0528302
MAP9	0.0113208	0.0603774	7.86075	0.00505195	0.0376342	0.0490566
LOC102724776	0.0113208	0.0603774	7.86075	0.00505195	0.0376342	0.0490566
GUCY1A3	0.0150943	0.0566038	5.45885	0.0194694	0.0816215	0.0415094
GUCY1B3	0.0113208	0.0528302	6.07728	0.0136931	0.0676919	0.0415094
ASIC5	0.0113208	0.0528302	6.07728	0.0136931	0.0676919	0.0415094
TDO2	0.0113208	0.0566038	6.95855	0.00834196	0.0512266	0.045283
CTSO	0.0113208	0.0566038	6.95855	0.00834196	0.0512266	0.045283
PDGFC	0.0113208	0.0679245	9.7184	0.00182432	0.0210979	0.0566038
GLRB	0.00754717	0.0641509	10.6994	0.00107173	0.0167128	0.0566038
GRIA2	0.00377358	0.0641509	12.9395	0.000321729	0.0115529	0.0603774
LOC340017	0.00754717	0.0641509	10.6994	0.00107173	0.0167128	0.0566038
FAM198B	0.00754717	0.0641509	10.6994	0.00107173	0.0167128	0.0566038
TMEM144	0.00754717	0.0641509	10.6994	0.00107173	0.0167128	0.0566038
RXFP1	0.00754717	0.0641509	10.6994	0.00107173	0.0167128	0.0566038
C4orf46	0.00754717	0.0641509	10.6994	0.00107173	0.0167128	0.0566038
ETFDH	0.00754717	0.0641509	10.6994	0.00107173	0.0167128	0.0566038
PPID	0.00754717	0.0641509	10.6994	0.00107173	0.0167128	0.0566038
FNIP2	0.00754717	0.0679245	11.6912	0.000627972	0.0140168	0.0603774
C4orf45	0.00754717	0.0641509	10.6994	0.00107173	0.0167128	0.0566038
MIR3688-1	0.00754717	0.0603774	9.71897	0.00182376	0.0210979	0.0528302
MIR3688-2	0.00754717	0.0603774	9.71897	0.00182376	0.0210979	0.0528302
RAPGEF2	0.00754717	0.0603774	9.71897	0.00182376	0.0210979	0.0528302
FSTL5	0.0113208	0.0641509	8.78137	0.00304322	0.0278209	0.0528302
LOC101928052	0.00754717	0.0566038	8.75129	0.00309383	0.0278209	0.0490566
MIR4454|chr4	0.00754717	0.0528302	7.79791	0.00523067	0.0376342	0.045283
NAF1	0.00754717	0.0528302	7.79791	0.00523067	0.0376342	0.045283
NPY1R	0.00754717	0.0528302	7.79791	0.00523067	0.0376342	0.045283
NPY5R	0.00754717	0.0528302	7.79791	0.00523067	0.0376342	0.045283
TKTL2	0.00754717	0.0528302	7.79791	0.00523067	0.0376342	0.045283
TMA16	0.00754717	0.0528302	7.79791	0.00523067	0.0376342	0.045283
2022-03-01	0.00754717	0.0528302	7.79791	0.00523067	0.0376342	0.045283
ANP32C	0.00754717	0.0528302	7.79791	0.00523067	0.0376342	0.045283
APELA	0.00754717	0.0603774	9.71897	0.00182376	0.0210979	0.0528302
FAM218A	0.00754717	0.0603774	9.71897	0.00182376	0.0210979	0.0528302
LINC01207	0.00754717	0.0603774	9.71897	0.00182376	0.0210979	0.0528302
TRIM61	0.00754717	0.0603774	9.71897	0.00182376	0.0210979	0.0528302
TRIM60	0.00754717	0.0603774	9.71897	0.00182376	0.0210979	0.0528302
TMEM192	0.00754717	0.0603774	9.71897	0.00182376	0.0210979	0.0528302
KLHL2	0.0113208	0.0641509	8.78137	0.00304322	0.0278209	0.0528302
GK3P	0.00754717	0.0641509	10.6994	0.00107173	0.0167128	0.0566038
MSMO1	0.00754717	0.0641509	10.6994	0.00107173	0.0167128	0.0566038
CPE	0.00754717	0.0641509	10.6994	0.00107173	0.0167128	0.0566038
MIR578	0.00754717	0.0641509	10.6994	0.00107173	0.0167128	0.0566038
hsa-mir-1979	0.00754717	0.0641509	10.6994	0.00107173	0.0167128	0.0566038
LINC01179	0.00754717	0.0679245	11.6912	0.000627972	0.0140168	0.0603774
LOC101928131	0.00754717	0.0679245	11.6912	0.000627972	0.0140168	0.0603774
TLL1	0.00754717	0.0716981	12.6934	0.000366944	0.0115529	0.0641509
SPOCK3	0.00754717	0.0754717	13.7053	0.000213855	0.0100224	0.0679245
ANXA10	0.00754717	0.0716981	12.6934	0.000366944	0.0115529	0.0641509
DDX60	0.00754717	0.0716981	12.6934	0.000366944	0.0115529	0.0641509
DDX60L	0.00754717	0.0716981	12.6934	0.000366944	0.0115529	0.0641509
PALLD	0.0113208	0.0754717	11.6354	0.000647096	0.0140668	0.0641509
CBR4	0.0113208	0.0754717	11.6354	0.000647096	0.0140668	0.0641509
SH3RF1	0.0113208	0.0830189	13.6016	0.000225995	0.0100224	0.0716981
NEK1	0.0113208	0.0830189	13.6016	0.000225995	0.0100224	0.0716981
CLCN3	0.0113208	0.0754717	11.6354	0.000647096	0.0140668	0.0641509
HPF1	0.00754717	0.0754717	13.7053	0.000213855	0.0100224	0.0679245
LOC100506085	0.00754717	0.0792453	14.726	0.000124319	0.00834024	0.0716981
MFAP3L	0.00754717	0.0792453	14.726	0.000124319	0.00834024	0.0716981
AADAT	0.0113208	0.0792453	12.6128	0.000383112	0.0115529	0.0679245
LINC01612	0.0113208	0.0792453	12.6128	0.000383112	0.0115529	0.0679245
LOC100506107	0.0113208	0.0830189	13.6016	0.000225995	0.0100224	0.0716981
LOC100506122	0.0113208	0.0792453	12.6128	0.000383112	0.0115529	0.0679245
MIR6082	0.0150943	0.0792453	10.7469	0.00104452	0.0167128	0.0641509
LOC441052	0.0150943	0.0792453	10.7469	0.00104452	0.0167128	0.0641509
GALNTL6	0.0226415	0.101887	12.926	0.000324042	0.0115529	0.0792453
LOC101928314	0.0188679	0.0830189	9.99043	0.00157356	0.0210034	0.0641509
LOC101930370	0.0226415	0.090566	10.2113	0.0013958	0.0197895	0.0679245
GALNT7	0.0226415	0.090566	10.2113	0.0013958	0.0197895	0.0679245
MIR548T	0.0226415	0.0830189	8.48392	0.00358299	0.0307107	0.0603774
HMGB2	0.0150943	0.0830189	11.6888	0.000628775	0.0140168	0.0679245
SAP30	0.0150943	0.0830189	11.6888	0.000628775	0.0140168	0.0679245
SCRG1	0.0150943	0.0830189	11.6888	0.000628775	0.0140168	0.0679245
HAND2-AS1	0.0150943	0.090566	13.612	0.000224747	0.0100224	0.0754717
HAND2	0.0150943	0.0830189	11.6888	0.000628775	0.0140168	0.0679245
LOC101928509	0.0150943	0.0867925	12.6441	0.000376746	0.0115529	0.0716981
FBXO8	0.0150943	0.0867925	12.6441	0.000376746	0.0115529	0.0716981
CEP44	0.0150943	0.0830189	11.6888	0.000628775	0.0140168	0.0679245
MIR4276	0.0150943	0.0830189	11.6888	0.000628775	0.0140168	0.0679245
HPGD	0.0150943	0.0830189	11.6888	0.000628775	0.0140168	0.0679245
GLRA3	0.0150943	0.0830189	11.6888	0.000628775	0.0140168	0.0679245
LOC101928551	0.0150943	0.0867925	12.6441	0.000376746	0.0115529	0.0716981
ADAM29	0.0150943	0.0867925	12.6441	0.000376746	0.0115529	0.0716981
GPM6A	0.0150943	0.0867925	12.6441	0.000376746	0.0115529	0.0716981
LOC101928590	0.0150943	0.0867925	12.6441	0.000376746	0.0115529	0.0716981
WDR17	0.0150943	0.0830189	11.6888	0.000628775	0.0140168	0.0679245
SPATA4	0.0150943	0.0830189	11.6888	0.000628775	0.0140168	0.0679245
ASB5	0.0150943	0.0867925	12.6441	0.000376746	0.0115529	0.0716981
SPCS3	0.0150943	0.0867925	12.6441	0.000376746	0.0115529	0.0716981
VEGFC	0.0113208	0.090566	15.61	7.784e-05	0.0073589	0.0792453
NEIL3	0.0150943	0.0867925	12.6441	0.000376746	0.0115529	0.0716981
AGA	0.0150943	0.0867925	12.6441	0.000376746	0.0115529	0.0716981
LINC01098	0.0188679	0.0943396	12.7553	0.000354995	0.0115529	0.0754717
LINC01099	0.0188679	0.090566	11.8191	0.000586255	0.0140162	0.0716981
LINC00290	0.0301887	0.101887	9.91169	0.00164232	0.0210979	0.0716981
LOC90768	0.0264151	0.090566	8.77109	0.00306042	0.0278209	0.0641509
MIR1305	0.0264151	0.090566	8.77109	0.00306042	0.0278209	0.0641509
TENM3	0.0264151	0.101887	11.3455	0.000756322	0.0154644	0.0754717
DCTD	0.0226415	0.101887	12.926	0.000324042	0.0115529	0.0792453
FAM92A1P2	0.0226415	0.101887	12.926	0.000324042	0.0115529	0.0792453
WWC2-AS1	0.0226415	0.101887	12.926	0.000324042	0.0115529	0.0792453
WWC2-AS2	0.0226415	0.101887	12.926	0.000324042	0.0115529	0.0792453
WWC2	0.0226415	0.10566	13.8597	0.000196977	0.0100224	0.0830189
CLDN22	0.0188679	0.101887	14.6668	0.000128287	0.00834024	0.0830189
CLDN24	0.0188679	0.101887	14.6668	0.000128287	0.00834024	0.0830189
CDKN2AIP	0.0226415	0.101887	12.926	0.000324042	0.0115529	0.0792453
LOC389247	0.0226415	0.101887	12.926	0.000324042	0.0115529	0.0792453
ING2	0.0226415	0.101887	12.926	0.000324042	0.0115529	0.0792453
ENPP6	0.0264151	0.0943396	9.61157	0.00193355	0.0213101	0.0679245
RWDD4	0.0264151	0.0943396	9.61157	0.00193355	0.0213101	0.0679245
STOX2	0.0264151	0.0943396	9.61157	0.00193355	0.0213101	0.0679245
TRAPPC11	0.0264151	0.0943396	9.61157	0.00193355	0.0213101	0.0679245
LOC728175	0.0301887	0.0981132	9.08266	0.00258044	0.0258821	0.0679245
LOC102723766	0.0301887	0.0981132	9.08266	0.00258044	0.0258821	0.0679245
IRF2	0.0301887	0.10566	10.7585	0.00103799	0.0167128	0.0754717
LVCAT8	0.0226415	0.0943396	11.1009	0.000862853	0.0162441	0.0716981
CASP3	0.0226415	0.0943396	11.1009	0.000862853	0.0162441	0.0716981
CENPU	0.0226415	0.0943396	11.1009	0.000862853	0.0162441	0.0716981
PRIMPOL	0.0226415	0.0943396	11.1009	0.000862853	0.0162441	0.0716981
ACSL1	0.0264151	0.0943396	9.61157	0.00193355	0.0213101	0.0679245
SLED1	0.0226415	0.0943396	11.1009	0.000862853	0.0162441	0.0716981
CFAP97	0.0301887	0.0943396	8.27267	0.00402464	0.0337347	0.0641509
HELT	0.0301887	0.0943396	8.27267	0.00402464	0.0337347	0.0641509
LINC01093	0.0301887	0.0943396	8.27267	0.00402464	0.0337347	0.0641509
LRP2BP	0.0339623	0.0981132	7.83146	0.00513447	0.0376342	0.0641509
MIR3945HG	0.0301887	0.0943396	8.27267	0.00402464	0.0337347	0.0641509
MIR3945	0.0301887	0.0943396	8.27267	0.00402464	0.0337347	0.0641509
MIR4455	0.0301887	0.0943396	8.27267	0.00402464	0.0337347	0.0641509
SLC25A4	0.0301887	0.0943396	8.27267	0.00402464	0.0337347	0.0641509
SNX25	0.0301887	0.0943396	8.27267	0.00402464	0.0337347	0.0641509
ANKRD37	0.0301887	0.0981132	9.08266	0.00258044	0.0258821	0.0679245
UFSP2	0.0301887	0.0981132	9.08266	0.00258044	0.0258821	0.0679245
C4orf47	0.0301887	0.0981132	9.08266	0.00258044	0.0258821	0.0679245
CCDC110	0.0301887	0.0981132	9.08266	0.00258044	0.0258821	0.0679245
LOC105377590	0.0301887	0.0943396	8.27267	0.00402464	0.0337347	0.0641509
PDLIM3	0.0301887	0.0943396	8.27267	0.00402464	0.0337347	0.0641509
SORBS2	0.0377358	0.0981132	6.70547	0.00961178	0.0549112	0.0603774
TLR3	0.0377358	0.101887	7.43819	0.00638541	0.0438426	0.0641509
FAM149A	0.0339623	0.101887	8.6128	0.00333809	0.0294574	0.0679245
FLJ38576	0.0339623	0.0981132	7.83146	0.00513447	0.0376342	0.0641509
CYP4V2	0.0339623	0.0981132	7.83146	0.00513447	0.0376342	0.0641509
KLKB1	0.0339623	0.0981132	7.83146	0.00513447	0.0376342	0.0641509
F11	0.0377358	0.0943396	5.99596	0.0143387	0.0687291	0.0566038
F11-AS1	0.0377358	0.0981132	6.70547	0.00961178	0.0549112	0.0603774
MTNR1A	0.0339623	0.0943396	7.07128	0.00783294	0.0490158	0.0603774
FAT1	0.0377358	0.0943396	5.99596	0.0143387	0.0687291	0.0566038
LOC339975	0.0377358	0.090566	5.31131	0.0211874	0.0860642	0.0528302
LOC100506272	0.0339623	0.0867925	5.62061	0.0177505	0.0775863	0.0528302
DBET	0.0339623	0.0867925	5.62061	0.0177505	0.0775863	0.0528302
DUX4|chr4	0.0339623	0.0867925	5.62061	0.0177505	0.0775863	0.0528302
FRG1	0.0339623	0.0867925	5.62061	0.0177505	0.0775863	0.0528302
FRG2	0.0339623	0.0867925	5.62061	0.0177505	0.0775863	0.0528302
LINC01060	0.0339623	0.0867925	5.62061	0.0177505	0.0775863	0.0528302
LINC01262	0.0339623	0.0867925	5.62061	0.0177505	0.0775863	0.0528302
LINC01596	0.0339623	0.0867925	5.62061	0.0177505	0.0775863	0.0528302
TRIML1	0.0339623	0.0867925	5.62061	0.0177505	0.0775863	0.0528302
TRIML2	0.0339623	0.0867925	5.62061	0.0177505	0.0775863	0.0528302
ZFP42	0.0339623	0.0867925	5.62061	0.0177505	0.0775863	0.0528302
SLC6A3	0.0264151	0.0716981	4.89393	0.0269513	0.094663	0.045283
IRX4	0.0226415	0.0679245	5.2808	0.0215619	0.0860642	0.045283
LOC101929034	0.0226415	0.0679245	5.2808	0.0215619	0.0860642	0.045283
LOC728613	0.0226415	0.0679245	5.2808	0.0215619	0.0860642	0.045283
LPCAT1	0.0226415	0.0679245	5.2808	0.0215619	0.0860642	0.045283
MIR4277	0.0226415	0.0679245	5.2808	0.0215619	0.0860642	0.045283
MIR6075	0.0226415	0.0679245	5.2808	0.0215619	0.0860642	0.045283
MRPL36	0.0226415	0.0679245	5.2808	0.0215619	0.0860642	0.045283
NDUFS6	0.0226415	0.0679245	5.2808	0.0215619	0.0860642	0.045283
SDHAP3	0.0226415	0.0679245	5.2808	0.0215619	0.0860642	0.045283
CTD-2194D22.4	0.0226415	0.0679245	5.2808	0.0215619	0.0860642	0.045283
C5orf17	0.00754717	0.0603774	9.71897	0.00182376	0.0210979	0.0528302
CDH10	0.00754717	0.0603774	9.71897	0.00182376	0.0210979	0.0528302
LOC340107	0.00754717	0.0490566	6.86084	0.00881051	0.0525999	0.0415094
LOC105374693	0.00754717	0.0528302	7.79791	0.00523067	0.0376342	0.045283
CDH9	0.00754717	0.0490566	6.86084	0.00881051	0.0525999	0.0415094
LINC01021	0.00754717	0.0528302	7.79791	0.00523067	0.0376342	0.045283
LOC105374698	0.00754717	0.045283	5.94269	0.0147784	0.0689368	0.0377358
LSP1P3	0.00754717	0.0490566	6.86084	0.00881051	0.0525999	0.0415094
LOC101929645	0.0113208	0.0490566	5.22009	0.0223274	0.0860642	0.0377358
LOC101929660	0.0113208	0.0528302	6.07728	0.0136931	0.0676919	0.0415094
CDH6	0.00377358	0.045283	7.88573	0.00498263	0.0376342	0.0415094
DROSHA	0.00377358	0.045283	7.88573	0.00498263	0.0376342	0.0415094
C5orf22	0.00377358	0.0415094	6.90637	0.00858892	0.052421	0.0377358
PDZD2	0.0113208	0.0490566	5.22009	0.0223274	0.0860642	0.0377358
MIR4279	0.0113208	0.0490566	5.22009	0.0223274	0.0860642	0.0377358
GOLPH3	0.00377358	0.0490566	8.87735	0.0028873	0.0273951	0.045283
MTMR12	0.00377358	0.0566038	10.8913	0.000966173	0.0162441	0.0528302
ZFR	0.00377358	0.0528302	9.87961	0.0016712	0.0210979	0.0490566
MIR579	0.00377358	0.0528302	9.87961	0.0016712	0.0210979	0.0490566
SUB1	0.00754717	0.0490566	6.86084	0.00881051	0.0525999	0.0415094
NPR3	0.0113208	0.0528302	6.07728	0.0136931	0.0676919	0.0415094
RAI14	0.0150943	0.0566038	5.45885	0.0194694	0.0816215	0.0415094
MIR7641-2|chr5	0.00754717	0.0490566	6.86084	0.00881051	0.0525999	0.0415094
TTC23L	0.00754717	0.0490566	6.86084	0.00881051	0.0525999	0.0415094
RAD1	0.00754717	0.0490566	6.86084	0.00881051	0.0525999	0.0415094
BRIX1	0.00754717	0.0490566	6.86084	0.00881051	0.0525999	0.0415094
DNAJC21	0.00754717	0.0490566	6.86084	0.00881051	0.0525999	0.0415094
AGXT2	0.00754717	0.0528302	7.79791	0.00523067	0.0376342	0.045283
PRLR	0.00754717	0.0528302	7.79791	0.00523067	0.0376342	0.045283
SPEF2	0.00754717	0.0603774	9.71897	0.00182376	0.0210979	0.0528302
IL7R	0.0113208	0.0566038	6.95855	0.00834196	0.0512266	0.045283
CAPSL	0.00754717	0.0528302	7.79791	0.00523067	0.0376342	0.045283
LOC100506406	0.00754717	0.0528302	7.79791	0.00523067	0.0376342	0.045283
UGT3A1	0.00754717	0.0528302	7.79791	0.00523067	0.0376342	0.045283
UGT3A2	0.00754717	0.0603774	9.71897	0.00182376	0.0210979	0.0528302
LMBRD2	0.00754717	0.0603774	9.71897	0.00182376	0.0210979	0.0528302
MIR580	0.00754717	0.0566038	8.75129	0.00309383	0.0278209	0.0490566
SKP2	0.00754717	0.0566038	8.75129	0.00309383	0.0278209	0.0490566
NADK2	0.00754717	0.0566038	8.75129	0.00309383	0.0278209	0.0490566
RANBP3L	0.00754717	0.0566038	8.75129	0.00309383	0.0278209	0.0490566
SLC1A3	0.0113208	0.0603774	7.86075	0.00505195	0.0376342	0.0490566
NIPBL-AS1	0.0150943	0.0603774	6.28725	0.0121609	0.062619	0.045283
NIPBL	0.0188679	0.0603774	4.95837	0.0259647	0.0937181	0.0415094
C5orf42	0.0113208	0.0641509	8.78137	0.00304322	0.0278209	0.0528302
LOC105374727	0.0113208	0.0603774	7.86075	0.00505195	0.0376342	0.0490566
NUP155	0.00754717	0.0641509	10.6994	0.00107173	0.0167128	0.0566038
WDR70	0.00754717	0.0603774	9.71897	0.00182376	0.0210979	0.0528302
GDNF	0.00754717	0.0528302	7.79791	0.00523067	0.0376342	0.045283
GDNF-AS1	0.00754717	0.0528302	7.79791	0.00523067	0.0376342	0.045283
LOC105374729	0.00754717	0.0528302	7.79791	0.00523067	0.0376342	0.045283
LOC101929745	0.00377358	0.0528302	9.87961	0.0016712	0.0210979	0.0490566
EGFLAM	0.00754717	0.0528302	7.79791	0.00523067	0.0376342	0.045283
EGFLAM-AS4	0.00377358	0.0528302	9.87961	0.0016712	0.0210979	0.0490566
EGFLAM-AS2	0.00754717	0.0490566	6.86084	0.00881051	0.0525999	0.0415094
LIFR	0.00754717	0.0490566	6.86084	0.00881051	0.0525999	0.0415094
LIFR-AS1	0.00754717	0.0490566	6.86084	0.00881051	0.0525999	0.0415094
MIR3650	0.00754717	0.0490566	6.86084	0.00881051	0.0525999	0.0415094
OSMR-AS1	0.00754717	0.0490566	6.86084	0.00881051	0.0525999	0.0415094
LINC01265	0.00754717	0.0490566	6.86084	0.00881051	0.0525999	0.0415094
OSMR	0.00754717	0.0490566	6.86084	0.00881051	0.0525999	0.0415094
RICTOR	0.00754717	0.0490566	6.86084	0.00881051	0.0525999	0.0415094
C9	0.00377358	0.045283	7.88573	0.00498263	0.0376342	0.0415094
DAB2	0.00754717	0.045283	5.94269	0.0147784	0.0689368	0.0377358
LOC101926940	0.00754717	0.0415094	5.04687	0.0246705	0.0928143	0.0339623
PDE4D	0.0226415	0.0754717	6.83532	0.00893728	0.0526552	0.0528302
ERBIN	0.0188679	0.0603774	4.95837	0.0259647	0.0937181	0.0415094
GTF2H2B	0.0150943	0.0566038	5.45885	0.0194694	0.0816215	0.0415094
GTF2H2C_2	0.0150943	0.0566038	5.45885	0.0194694	0.0816215	0.0415094
GTF2H2C	0.0150943	0.0566038	5.45885	0.0194694	0.0816215	0.0415094
GTF2H2	0.0150943	0.0566038	5.45885	0.0194694	0.0816215	0.0415094
GUSBP3	0.0150943	0.0566038	5.45885	0.0194694	0.0816215	0.0415094
GUSBP9	0.0150943	0.0566038	5.45885	0.0194694	0.0816215	0.0415094
LOC101928924	0.0150943	0.0566038	5.45885	0.0194694	0.0816215	0.0415094
LOC102724392	0.0150943	0.0566038	5.45885	0.0194694	0.0816215	0.0415094
LOC441081	0.0150943	0.0566038	5.45885	0.0194694	0.0816215	0.0415094
LOC647859	0.0150943	0.0566038	5.45885	0.0194694	0.0816215	0.0415094
NAIP	0.0150943	0.0566038	5.45885	0.0194694	0.0816215	0.0415094
OCLN	0.0150943	0.0566038	5.45885	0.0194694	0.0816215	0.0415094
SERF1A	0.0150943	0.0566038	5.45885	0.0194694	0.0816215	0.0415094
SERF1B	0.0150943	0.0566038	5.45885	0.0194694	0.0816215	0.0415094
SMA4	0.0150943	0.0566038	5.45885	0.0194694	0.0816215	0.0415094
SMA5	0.0150943	0.0566038	5.45885	0.0194694	0.0816215	0.0415094
SMN1	0.0150943	0.0566038	5.45885	0.0194694	0.0816215	0.0415094
SMN2	0.0150943	0.0566038	5.45885	0.0194694	0.0816215	0.0415094
MAP1B	0.0150943	0.0566038	5.45885	0.0194694	0.0816215	0.0415094
MIR4803	0.0150943	0.0566038	5.45885	0.0194694	0.0816215	0.0415094
MRPS27	0.0150943	0.0566038	5.45885	0.0194694	0.0816215	0.0415094
PTCD2	0.0150943	0.0566038	5.45885	0.0194694	0.0816215	0.0415094
LINC01335	0.0113208	0.0490566	5.22009	0.0223274	0.0860642	0.0377358
LINC01333	0.0113208	0.0490566	5.22009	0.0223274	0.0860642	0.0377358
LINC01331	0.0113208	0.0490566	5.22009	0.0223274	0.0860642	0.0377358
ENC1	0.0113208	0.0490566	5.22009	0.0223274	0.0860642	0.0377358
HEXB	0.0113208	0.0490566	5.22009	0.0223274	0.0860642	0.0377358
GFM2	0.0113208	0.0490566	5.22009	0.0223274	0.0860642	0.0377358
NSA2	0.0113208	0.0490566	5.22009	0.0223274	0.0860642	0.0377358
FAM169A	0.0113208	0.0528302	6.07728	0.0136931	0.0676919	0.0415094
LOC441086	0.0113208	0.0528302	6.07728	0.0136931	0.0676919	0.0415094
GCNT4	0.0113208	0.0528302	6.07728	0.0136931	0.0676919	0.0415094
LINC01336	0.0113208	0.0528302	6.07728	0.0136931	0.0676919	0.0415094
ANKRD31	0.0113208	0.0566038	6.95855	0.00834196	0.0512266	0.045283
COL4A3BP	0.0113208	0.0603774	7.86075	0.00505195	0.0376342	0.0490566
HMGCR	0.0113208	0.0528302	6.07728	0.0136931	0.0676919	0.0415094
POLK	0.0113208	0.0566038	6.95855	0.00834196	0.0512266	0.045283
ANKDD1B	0.0113208	0.0641509	8.78137	0.00304322	0.0278209	0.0528302
POC5	0.0113208	0.0641509	8.78137	0.00304322	0.0278209	0.0528302
SV2C	0.0113208	0.0679245	9.7184	0.00182432	0.0210979	0.0566038
IQGAP2	0.0113208	0.0716981	10.6702	0.00108876	0.0167128	0.0603774
F2RL2	0.0113208	0.0641509	8.78137	0.00304322	0.0278209	0.0528302
LOC101929109	0.0113208	0.0603774	7.86075	0.00505195	0.0376342	0.0490566
NCRUPAR	0.0113208	0.0603774	7.86075	0.00505195	0.0376342	0.0490566
F2R	0.0113208	0.0603774	7.86075	0.00505195	0.0376342	0.0490566
F2RL1	0.0113208	0.0528302	6.07728	0.0136931	0.0676919	0.0415094
AGGF1	0.0150943	0.0566038	5.45885	0.0194694	0.0816215	0.0415094
PDE8B	0.0150943	0.0641509	7.14005	0.0075381	0.0482275	0.0490566
WDR41	0.0150943	0.0603774	6.28725	0.0121609	0.062619	0.045283
OTP	0.0150943	0.0566038	5.45885	0.0194694	0.0816215	0.0415094
TBCA	0.0150943	0.0566038	5.45885	0.0194694	0.0816215	0.0415094
HOMER1	0.0113208	0.0490566	5.22009	0.0223274	0.0860642	0.0377358
PAPD4	0.0113208	0.0490566	5.22009	0.0223274	0.0860642	0.0377358
CMYA5	0.0113208	0.0528302	6.07728	0.0136931	0.0676919	0.0415094
LINC01455	0.0113208	0.0490566	5.22009	0.0223274	0.0860642	0.0377358
MTX3	0.0113208	0.0490566	5.22009	0.0223274	0.0860642	0.0377358
THBS4	0.0113208	0.0528302	6.07728	0.0136931	0.0676919	0.0415094
CTD-2201I18.1	0.0113208	0.0490566	5.22009	0.0223274	0.0860642	0.0377358
SERINC5	0.0113208	0.0490566	5.22009	0.0223274	0.0860642	0.0377358
MIR3660	0.0113208	0.0490566	5.22009	0.0223274	0.0860642	0.0377358
LINC01339	0.0113208	0.0528302	6.07728	0.0136931	0.0676919	0.0415094
CETN3	0.0113208	0.0490566	5.22009	0.0223274	0.0860642	0.0377358
MCTP1	0.0113208	0.0490566	5.22009	0.0223274	0.0860642	0.0377358
FAM81B	0.0113208	0.0490566	5.22009	0.0223274	0.0860642	0.0377358
TTC37	0.0113208	0.0490566	5.22009	0.0223274	0.0860642	0.0377358
ARSK	0.0113208	0.0490566	5.22009	0.0223274	0.0860642	0.0377358
GPR150	0.0113208	0.0490566	5.22009	0.0223274	0.0860642	0.0377358
RFESD	0.0113208	0.0490566	5.22009	0.0223274	0.0860642	0.0377358
SPATA9	0.0113208	0.0490566	5.22009	0.0223274	0.0860642	0.0377358
RHOBTB3	0.0113208	0.0490566	5.22009	0.0223274	0.0860642	0.0377358
GLRX	0.0113208	0.0490566	5.22009	0.0223274	0.0860642	0.0377358
PCSK1	0.0113208	0.0528302	6.07728	0.0136931	0.0676919	0.0415094
MIR8056	0.0264151	0.0754717	5.61962	0.0177605	0.0775863	0.0490566
LOC285593	0.0264151	0.0754717	5.61962	0.0177605	0.0775863	0.0490566
BOD1	0.0264151	0.0754717	5.61962	0.0177605	0.0775863	0.0490566
LINC01484	0.0264151	0.0792453	6.37237	0.0115911	0.0616641	0.0528302
LINC01485	0.0264151	0.0754717	5.61962	0.0177605	0.0775863	0.0490566
CPEB4	0.0264151	0.0754717	5.61962	0.0177605	0.0775863	0.0490566
C5orf47	0.0264151	0.0754717	5.61962	0.0177605	0.0775863	0.0490566
HMP19	0.0264151	0.0754717	5.61962	0.0177605	0.0775863	0.0490566
LINC01411	0.0264151	0.0830189	7.14984	0.00749707	0.0482275	0.0566038
FLJ16171	0.0264151	0.0754717	5.61962	0.0177605	0.0775863	0.0490566
DRD1	0.0264151	0.0716981	4.89393	0.0269513	0.094663	0.045283
SFXN1	0.0264151	0.0754717	5.61962	0.0177605	0.0775863	0.0490566
HRH2	0.0301887	0.0792453	5.25294	0.0219097	0.0860642	0.0490566
KIAA1191	0.0301887	0.0792453	5.25294	0.0219097	0.0860642	0.0490566
ARL10	0.0301887	0.0792453	5.25294	0.0219097	0.0860642	0.0490566
MIR1271	0.0301887	0.0792453	5.25294	0.0219097	0.0860642	0.0490566
NOP16	0.0301887	0.0792453	5.25294	0.0219097	0.0860642	0.0490566
HIGD2A	0.0301887	0.0792453	5.25294	0.0219097	0.0860642	0.0490566
CLTB	0.0301887	0.0792453	5.25294	0.0219097	0.0860642	0.0490566
FAF2	0.0301887	0.0792453	5.25294	0.0219097	0.0860642	0.0490566
RNF44	0.0301887	0.0792453	5.25294	0.0219097	0.0860642	0.0490566
CDHR2	0.0301887	0.0830189	5.97133	0.0145403	0.0687291	0.0528302
GPRIN1	0.0301887	0.0830189	5.97133	0.0145403	0.0687291	0.0528302
SNCB	0.0301887	0.0830189	5.97133	0.0145403	0.0687291	0.0528302
EIF4E1B	0.0301887	0.0830189	5.97133	0.0145403	0.0687291	0.0528302
HK3	0.0301887	0.0830189	5.97133	0.0145403	0.0687291	0.0528302
LINC01574	0.0301887	0.0830189	5.97133	0.0145403	0.0687291	0.0528302
MIR4281	0.0301887	0.0830189	5.97133	0.0145403	0.0687291	0.0528302
TSPAN17	0.0301887	0.0830189	5.97133	0.0145403	0.0687291	0.0528302
UNC5A	0.0301887	0.0830189	5.97133	0.0145403	0.0687291	0.0528302
UIMC1	0.0339623	0.0830189	4.93374	0.0263373	0.0941347	0.0490566
ZNF346	0.0339623	0.0830189	4.93374	0.0263373	0.0941347	0.0490566
FGFR4	0.0339623	0.0830189	4.93374	0.0263373	0.0941347	0.0490566
NSD1	0.0339623	0.0830189	4.93374	0.0263373	0.0941347	0.0490566
RAB24	0.0339623	0.0830189	4.93374	0.0263373	0.0941347	0.0490566
PRELID1	0.0339623	0.0830189	4.93374	0.0263373	0.0941347	0.0490566
MXD3	0.0339623	0.0830189	4.93374	0.0263373	0.0941347	0.0490566
LMAN2	0.0301887	0.0830189	5.97133	0.0145403	0.0687291	0.0528302
RGS14	0.0301887	0.0830189	5.97133	0.0145403	0.0687291	0.0528302
SLC34A1	0.0301887	0.0792453	5.25294	0.0219097	0.0860642	0.0490566
F12	0.0301887	0.0792453	5.25294	0.0219097	0.0860642	0.0490566
PFN3	0.0301887	0.0792453	5.25294	0.0219097	0.0860642	0.0490566
GRK6	0.0301887	0.0792453	5.25294	0.0219097	0.0860642	0.0490566
PRR7-AS1	0.0301887	0.0792453	5.25294	0.0219097	0.0860642	0.0490566
PRR7	0.0301887	0.0792453	5.25294	0.0219097	0.0860642	0.0490566
DBN1	0.0301887	0.0792453	5.25294	0.0219097	0.0860642	0.0490566
PDLIM7	0.0301887	0.0792453	5.25294	0.0219097	0.0860642	0.0490566
DOK3	0.0301887	0.0792453	5.25294	0.0219097	0.0860642	0.0490566
DDX41	0.0301887	0.0792453	5.25294	0.0219097	0.0860642	0.0490566
FAM193B	0.0301887	0.0830189	5.97133	0.0145403	0.0687291	0.0528302
TMED9	0.0301887	0.0830189	5.97133	0.0145403	0.0687291	0.0528302
B4GALT7	0.0301887	0.0830189	5.97133	0.0145403	0.0687291	0.0528302
LOC202181	0.0301887	0.0830189	5.97133	0.0145403	0.0687291	0.0528302
FAM153A	0.0301887	0.0830189	5.97133	0.0145403	0.0687291	0.0528302
LOC728554	0.0301887	0.0830189	5.97133	0.0145403	0.0687291	0.0528302
PROP1	0.0264151	0.0830189	7.14984	0.00749707	0.0482275	0.0566038
FAM153C	0.0264151	0.0792453	6.37237	0.0115911	0.0616641	0.0528302
N4BP3	0.0264151	0.0830189	7.14984	0.00749707	0.0482275	0.0566038
RMND5B	0.0264151	0.0867925	7.95	0.00480874	0.0376342	0.0603774
NHP2	0.0264151	0.0867925	7.95	0.00480874	0.0376342	0.0603774
GMCL1P1	0.0301887	0.0867925	6.71537	0.00955857	0.0549112	0.0566038
HNRNPAB	0.0301887	0.0867925	6.71537	0.00955857	0.0549112	0.0566038
PHYKPL	0.0301887	0.090566	7.48306	0.00622822	0.0432733	0.0603774
COL23A1	0.0301887	0.0867925	6.71537	0.00955857	0.0549112	0.0566038
CLK4	0.0301887	0.0792453	5.25294	0.0219097	0.0860642	0.0490566
ZNF354A	0.0301887	0.0830189	5.97133	0.0145403	0.0687291	0.0528302
AACSP1	0.0339623	0.0867925	5.62061	0.0177505	0.0775863	0.0528302
ZNF354B	0.0339623	0.0867925	5.62061	0.0177505	0.0775863	0.0528302
ZFP2	0.0339623	0.0867925	5.62061	0.0177505	0.0775863	0.0528302
ZNF454	0.0339623	0.0867925	5.62061	0.0177505	0.0775863	0.0528302
GRM6	0.0339623	0.0867925	5.62061	0.0177505	0.0775863	0.0528302
ZNF879	0.0339623	0.0867925	5.62061	0.0177505	0.0775863	0.0528302
ZNF354C	0.0301887	0.0867925	6.71537	0.00955857	0.0549112	0.0566038
ADAMTS2	0.0377358	0.090566	5.31131	0.0211874	0.0860642	0.0528302
RUFY1	0.0339623	0.0830189	4.93374	0.0263373	0.0941347	0.0490566
LOC101928445	0.0339623	0.0830189	4.93374	0.0263373	0.0941347	0.0490566
CBY3	0.0339623	0.0830189	4.93374	0.0263373	0.0941347	0.0490566
CANX	0.0339623	0.0830189	4.93374	0.0263373	0.0941347	0.0490566
MAML1	0.0339623	0.0830189	4.93374	0.0263373	0.0941347	0.0490566
LTC4S	0.0339623	0.0830189	4.93374	0.0263373	0.0941347	0.0490566
MGAT4B	0.0339623	0.0830189	4.93374	0.0263373	0.0941347	0.0490566
MIR1229	0.0339623	0.0830189	4.93374	0.0263373	0.0941347	0.0490566
SQSTM1	0.0339623	0.0830189	4.93374	0.0263373	0.0941347	0.0490566
C5orf45	0.0339623	0.0830189	4.93374	0.0263373	0.0941347	0.0490566
LOC100996419	0.0339623	0.0830189	4.93374	0.0263373	0.0941347	0.0490566
TBC1D9B	0.0339623	0.0830189	4.93374	0.0263373	0.0941347	0.0490566
RNF130	0.0339623	0.0830189	4.93374	0.0263373	0.0941347	0.0490566
MIR340	0.0339623	0.0830189	4.93374	0.0263373	0.0941347	0.0490566
C6orf106	0.0188679	0.0641509	5.73819	0.0165999	0.0747269	0.045283
LOC101929243	0.0150943	0.0566038	5.45885	0.0194694	0.0816215	0.0415094
ANKS1A	0.0113208	0.0566038	6.95855	0.00834196	0.0512266	0.045283
SNRPC	0.0113208	0.0566038	6.95855	0.00834196	0.0512266	0.045283
TAF11	0.0113208	0.0566038	6.95855	0.00834196	0.0512266	0.045283
UHRF1BP1	0.0113208	0.0566038	6.95855	0.00834196	0.0512266	0.045283
TCP11	0.00754717	0.0528302	7.79791	0.00523067	0.0376342	0.045283
SCUBE3	0.0113208	0.0528302	6.07728	0.0136931	0.0676919	0.0415094
ZNF76	0.0113208	0.0528302	6.07728	0.0136931	0.0676919	0.0415094
DEF6	0.0113208	0.0528302	6.07728	0.0136931	0.0676919	0.0415094
BTBD9	0.0150943	0.0641509	7.14005	0.0075381	0.0482275	0.0490566
KIF6	0.0113208	0.0528302	6.07728	0.0136931	0.0676919	0.0415094
DAAM2	0.00754717	0.0528302	7.79791	0.00523067	0.0376342	0.045283
LOC100505635	0.00754717	0.0528302	7.79791	0.00523067	0.0376342	0.045283
MOCS1	0.00754717	0.0528302	7.79791	0.00523067	0.0376342	0.045283
LINC00951	0.00754717	0.0566038	8.75129	0.00309383	0.0278209	0.0490566
TDRG1	0.00754717	0.0566038	8.75129	0.00309383	0.0278209	0.0490566
LRFN2	0.00754717	0.0566038	8.75129	0.00309383	0.0278209	0.0490566
LOC101929555	0.0113208	0.0603774	7.86075	0.00505195	0.0376342	0.0490566
UNC5CL	0.0113208	0.0603774	7.86075	0.00505195	0.0376342	0.0490566
TSPO2	0.0113208	0.0603774	7.86075	0.00505195	0.0376342	0.0490566
APOBEC2	0.0113208	0.0603774	7.86075	0.00505195	0.0376342	0.0490566
OARD1	0.0113208	0.0603774	7.86075	0.00505195	0.0376342	0.0490566
NFYA	0.0113208	0.0603774	7.86075	0.00505195	0.0376342	0.0490566
ADCY10P1	0.0113208	0.0603774	7.86075	0.00505195	0.0376342	0.0490566
TREML1	0.0113208	0.0603774	7.86075	0.00505195	0.0376342	0.0490566
TREM2	0.0113208	0.0603774	7.86075	0.00505195	0.0376342	0.0490566
TREML2	0.0113208	0.0603774	7.86075	0.00505195	0.0376342	0.0490566
TREML3P	0.0113208	0.0603774	7.86075	0.00505195	0.0376342	0.0490566
TREML4	0.0113208	0.0603774	7.86075	0.00505195	0.0376342	0.0490566
TREML5P	0.0113208	0.0603774	7.86075	0.00505195	0.0376342	0.0490566
TREM1	0.0113208	0.0603774	7.86075	0.00505195	0.0376342	0.0490566
NCR2	0.0113208	0.0641509	8.78137	0.00304322	0.0278209	0.0528302
LINC01276	0.0188679	0.0603774	4.95837	0.0259647	0.0937181	0.0415094
TFEB	0.0188679	0.0603774	4.95837	0.0259647	0.0937181	0.0415094
PGC	0.0188679	0.0603774	4.95837	0.0259647	0.0937181	0.0415094
FRS3	0.0188679	0.0641509	5.73819	0.0165999	0.0747269	0.045283
PRICKLE4	0.0188679	0.0641509	5.73819	0.0165999	0.0747269	0.045283
TOMM6	0.0188679	0.0641509	5.73819	0.0165999	0.0747269	0.045283
USP49	0.0188679	0.0641509	5.73819	0.0165999	0.0747269	0.045283
MED20	0.0188679	0.0641509	5.73819	0.0165999	0.0747269	0.045283
BYSL	0.0188679	0.0641509	5.73819	0.0165999	0.0747269	0.045283
CCND3	0.0188679	0.0716981	7.37566	0.00661126	0.0443847	0.0528302
TAF8	0.0188679	0.0641509	5.73819	0.0165999	0.0747269	0.045283
C6orf132	0.0188679	0.0679245	6.54489	0.0105186	0.0584845	0.0490566
GUCA1A	0.0150943	0.0679245	8.0145	0.00464044	0.0367446	0.0528302
GUCA1B	0.0150943	0.0679245	8.0145	0.00464044	0.0367446	0.0528302
MRPS10	0.0150943	0.0679245	8.0145	0.00464044	0.0367446	0.0528302
TRERF1	0.0188679	0.0716981	7.37566	0.00661126	0.0443847	0.0528302
UBR2	0.0188679	0.0716981	7.37566	0.00661126	0.0443847	0.0528302
PRPH2	0.0188679	0.0679245	6.54489	0.0105186	0.0584845	0.0490566
ATP6V0CP3	0.0188679	0.0641509	5.73819	0.0165999	0.0747269	0.045283
TBCC	0.0188679	0.0641509	5.73819	0.0165999	0.0747269	0.045283
GLTSCR1L	0.0188679	0.0679245	6.54489	0.0105186	0.0584845	0.0490566
LOC401261	0.0188679	0.0679245	6.54489	0.0105186	0.0584845	0.0490566
RPL7L1	0.0188679	0.0679245	6.54489	0.0105186	0.0584845	0.0490566
C6orf226	0.0188679	0.0679245	6.54489	0.0105186	0.0584845	0.0490566
PTCRA	0.0188679	0.0679245	6.54489	0.0105186	0.0584845	0.0490566
CNPY3-GNMT	0.0188679	0.0679245	6.54489	0.0105186	0.0584845	0.0490566
CNPY3	0.0188679	0.0679245	6.54489	0.0105186	0.0584845	0.0490566
GNMT	0.0188679	0.0679245	6.54489	0.0105186	0.0584845	0.0490566
PEX6	0.0188679	0.0679245	6.54489	0.0105186	0.0584845	0.0490566
PPP2R5D	0.0188679	0.0679245	6.54489	0.0105186	0.0584845	0.0490566
MEA1	0.0188679	0.0679245	6.54489	0.0105186	0.0584845	0.0490566
[truncated: 5,481 more rows]
