# Supplementary material for: Tumor-derived exosomes RNA expression profiling identifies the prognosis, immune characteristics, and treatment in HR+/HER2-breast cancer
Source: Aging (Albany NY). 2023 Aug 29;15(16):8471–86. doi: 10.18632/aging.204986 (PMC10497011; doi:10.18632/aging.204986)
Supplement: Supplementary Table 7 [file aging-15-204986-s005.xlsx]

## Sheet: Table S7
Supplementary Table 7. FPKM in GSE145325 dataset.
# Program:featureCounts v2.0.1; Command:"featureCounts" "-p" "-T" "30" "-t" "exon" "-g" "gene_id" "-a" "/home/zhou/seq_project/reference/ref/TCGA/gencode.v36.annotation.gtf" "-o" "/home/zhou/le/counts.txt" "/home/zhou/le/bam/sort_bam/SRR11080043_sort.bam" "/home/zhou/le/bam/sort_bam/SRR11080044_sort.bam" "/home/zhou/le/bam/sort_bam/SRR11080045_sort.bam" "/home/zhou/le/bam/sort_bam/SRR11080046_sor…
Geneid	Chr	Start	End	Strand	Length	/home/zhou/le/bam/sort_bam/SRR11080043_sort.bam	/home/zhou/le/bam/sort_bam/SRR11080044_sort.bam	/home/zhou/le/bam/sort_bam/SRR11080045_sort.bam	/home/zhou/le/bam/sort_bam/SRR11080046_sort.bam	/home/zhou/le/bam/sort_bam/SRR11080047_sort.bam	/home/zhou/le/bam/sort_bam/SRR11080048_sort.bam	/home/zhou/le/bam/sort_bam/SRR11080049_sort.bam	/home/zhou/le/bam/sort_bam/SRR11080050_sort.bam	/home/zhou/le/bam/sort_bam/SRR11080051_sort.bam	/home/zhou/le/bam/sort_bam/SRR11080052_sort.bam	/home/zhou/le/bam/sort_bam/SRR11080053_sort.bam	/home/zhou/le/bam/sort_bam/SRR11080054_sort.bam	/home/zhou/le/bam/sort_bam/SRR11080055_sort.bam	/home/zhou/le/bam/sort_bam/SRR11080056_sort.bam	/home/zhou/le/bam/sort_bam/SRR11080057_sort.bam	/home/zhou/le/bam/sort_bam/SRR11080058_sort.bam	/home/zhou/le/bam/sort_bam/SRR11080059_sort.bam	/home/zhou/le/bam/sort_bam/SRR11080060_sort.bam	/home/zhou/le/bam/sort_bam/SRR11080061_sort.bam	/home/zhou/le/bam/sort_bam/SRR11080062_sort.bam	/home/zhou/le/bam/sort_bam/SRR11080063_sort.bam	/home/zhou/le/bam/sort_bam/SRR11080064_sort.bam	/home/zhou/le/bam/sort_bam/SRR11080065_sort.bam	/home/zhou/le/bam/sort_bam/SRR11080066_sort.bam	/home/zhou/le/bam/sort_bam/SRR11080067_sort.bam	/home/zhou/le/bam/sort_bam/SRR11080068_sort.bam	/home/zhou/le/bam/sort_bam/SRR11080069_sort.bam	/home/zhou/le/bam/sort_bam/SRR11080070_sort.bam	/home/zhou/le/bam/sort_bam/SRR11080071_sort.bam	/home/zhou/le/bam/sort_bam/SRR11080072_sort.bam	/home/zhou/le/bam/sort_bam/SRR11080073_sort.bam	/home/zhou/le/bam/sort_bam/SRR11080074_sort.bam	/home/zhou/le/bam/sort_bam/SRR11080075_sort.bam	/home/zhou/le/bam/sort_bam/SRR11080076_sort.bam	/home/zhou/le/bam/sort_bam/SRR11080077_sort.bam	/home/zhou/le/bam/sort_bam/SRR11080078_sort.bam	/home/zhou/le/bam/sort_bam/SRR11080079_sort.bam	/home/zhou/le/bam/sort_bam/SRR11080080_sort.bam	/home/zhou/le/bam/sort_bam/SRR11080081_sort.bam	/home/zhou/le/bam/sort_bam/SRR11080082_sort.bam	/home/zhou/le/bam/sort_bam/SRR11080083_sort.bam	/home/zhou/le/bam/sort_bam/SRR11080084_sort.bam	/home/zhou/le/bam/sort_bam/SRR11080085_sort.bam	/home/zhou/le/bam/sort_bam/SRR11080086_sort.bam
ENSG00000223972.5	chr1;chr1;chr1;chr1;chr1;chr1;chr1;chr1;chr1	11869;12010;12179;12613;12613;12975;13221;13221;13453	12227;12057;12227;12721;12697;13052;14409;13374;13670	+;+;+;+;+;+;+;+;+	1735	0	0	0	2	0	0	0	3	0	0	0	3	0	3	1	0	1	0	0	0	16	0	16	0	2	0	6	0	0	1	0	0	0	0	0	0	3	0	0	0	0	0	0	0
ENSG00000227232.5	chr1;chr1;chr1;chr1;chr1;chr1;chr1;chr1;chr1;chr1;chr1	14404;15005;15796;16607;16858;17233;17606;17915;18268;24738;29534	14501;15038;15947;16765;17055;17368;17742;18061;18366;24891;29570	-;-;-;-;-;-;-;-;-;-;-	1351	19	0	1	4	9	29	31	7	18	0	4	0	0	13	1	5	22	35	26	2	25	19	12	13	7	3	3	4	18	43	48	37	8	9	10	0	14	4	19	6	13	1	27	75
ENSG00000278267.1	chr1	17369	17436	-	68	3	15	17	16	24	1	19	6	17	45	17	7	18	8	15	19	5	20	12	1	4	17	14	5	37	4	1	9	2	3	4	26	4	5	2	50	9	4	5	0	47	8	7	13
ENSG00000243485.5	chr1;chr1;chr1;chr1;chr1	29554;30267;30564;30976;30976	30039;30667;30667;31109;31097	+;+;+;+;+	1021	0	0	0	0	0	0	1	2	0	0	4	1	0	3	0	2	0	0	0	0	0	1	2	0	0	0	0	0	0	0	0	0	2	0	0	0	4	0	0	0	1	0	0	0
ENSG00000284332.1	chr1	30366	30503	+	138	0	0	0	0	0	0	0	0	0	0	0	0	0	0	0	0	0	0	0	0	0	0	0	0	0	0	0	0	0	0	0	0	0	0	0	0	0	0	0	0	0	0	0	0
ENSG00000237613.2	chr1;chr1;chr1;chr1;chr1	34554;35245;35277;35721;35721	35174;35481;35481;36073;36081	-;-;-;-;-	1219	0	0	0	0	0	0	0	0	0	0	0	0	0	0	0	5	2	0	0	0	13	0	7	0	0	0	0	0	1	0	0	0	0	0	0	0	6	7	0	0	0	0	0	0
ENSG00000268020.3	chr1	52473	53312	+	840	0	0	0	4	0	0	0	8	0	1	0	0	0	0	0	3	8	0	0	0	4	0	13	0	0	0	0	0	0	0	0	0	0	0	7	0	5	0	0	0	0	0	0	0
ENSG00000240361.2	chr1;chr1;chr1;chr1	57598;58700;62916;62949	57653;58856;64116;63887	+;+;+;+	1414	0	0	0	0	0	0	0	4	0	0	0	0	0	0	0	0	0	0	0	0	1	0	4	0	0	0	1	0	0	0	0	0	0	0	0	0	8	0	0	0	0	0	0	0
ENSG00000186092.6	chr1;chr1;chr1;chr1	65419;65520;69037;69055	65433;65573;71585;70108	+;+;+;+	2618	0	0	0	0	0	0	0	8	0	0	0	0	0	0	0	0	2	0	0	0	15	0	7	0	0	0	0	0	0	0	0	0	0	0	0	0	7	0	0	0	0	0	0	0
ENSG00000238009.6	chr1;chr1;chr1;chr1;chr1;chr1;chr1;chr1;chr1;chr1;chr1;chr1;chr1;chr1;chr1;chr1;chr1	89295;92091;92230;110953;112700;112700;112700;120721;120725;120775;120874;129055;129055;129055;129081;133374;133374	91629;92240;92240;111357;112804;112804;112804;120932;120869;120932;120932;129223;129173;129217;129223;133566;133723	-;-;-;-;-;-;-;-;-;-;-;-;-;-;-;-;-	3726	18	1	0	3	0	0	0	11	0	2	5	0	0	0	3	0	25	26	2	0	7	0	9	1	5	0	0	1	2	3	0	0	0	2	2	4	5	0	2	0	7	8	0	0
ENSG00000239945.1	chr1;chr1	89551;90287	90050;91105	-;-	1319	0	0	0	0	0	0	0	0	0	0	0	0	0	0	0	0	0	0	0	0	0	0	0	0	0	0	0	0	0	0	0	0	0	0	0	0	0	0	0	0	0	0	0	0
ENSG00000233750.3	chr1	131025	134836	+	3812	25	0	1	3	4	2	5	5	3	0	16	1	1	16	6	5	2	0	10	0	28	3	29	0	1	0	9	2	0	3	2	10	22	0	18	0	16	0	12	8	0	1	0	1
ENSG00000268903.1	chr1	135141	135895	-	755	16	0	9	0	4	1	0	2	3	0	12	7	4	34	3	40	11	11	29	1	38	16	3	0	12	0	0	15	0	28	0	0	0	8	0	0	6	12	12	17	29	4	2	0
ENSG00000269981.1	chr1	137682	137965	-	284	11	1	7	0	3	3	1	22	33	0	9	21	19	16	9	17	8	0	6	4	28	15	34	3	14	2	0	9	6	51	0	0	9	8	9	0	40	14	4	0	5	1	33	0
ENSG00000239906.1	chr1;chr1	139790;140075	139847;140339	-;-	323	0	0	0	0	0	0	1	2	0	0	0	0	0	0	1	0	0	0	0	0	4	9	0	0	0	0	0	1	0	0	0	0	0	0	0	0	3	0	0	0	0	0	0	0
ENSG00000241860.7	chr1;chr1;chr1;chr1;chr1;chr1;chr1;chr1;chr1;chr1;chr1;chr1;chr1;chr1;chr1;chr1;chr1;chr1;chr1;chr1;chr1	141474;142808;146386;146386;146386;146642;155767;164263;165491;165884;165889;167129;167959;168100;168100;168610;169049;169049;169049;172557;173753	143011;143011;146509;146509;149707;146831;155831;164791;165942;165942;165942;168165;168165;168165;168165;168767;169240;169210;169264;172688;173862	-;-;-;-;-;-;-;-;-;-;-;-;-;-;-;-;-;-;-;-;-	7559	20	1	2	15	2	5	0	34	2	3	4	0	7	28	1	10	55	4	11	1	41	2	20	0	2	2	4	1	19	3	0	1	2	5	12	6	12	2	1	3	7	1	0	8
ENSG00000222623.1	chr1	157784	157887	-	104	0	0	0	0	0	0	0	0	0	0	0	0	0	0	0	0	0	0	0	0	0	0	0	0	0	0	0	0	0	0	0	0	0	0	0	0	0	0	0	0	0	0	0	0
ENSG00000241599.1	chr1;chr1	160446;161314	160690;161525	+;+	457	0	0	0	0	0	0	0	0	0	0	1	0	0	1	0	0	0	0	0	0	0	0	1	0	0	0	0	0	0	0	0	0	0	1	0	0	0	0	0	0	1	1	0	0
ENSG00000279928.2	chr1;chr1;chr1;chr1;chr1	182696;183132;183494;183740;183981	182746;183216;183571;183901;184174	+;+;+;+;+	570	1	0	0	0	3	0	0	24	0	2	0	0	0	0	4	29	19	0	0	5	21	0	99	4	0	0	16	0	6	2	0	0	2	1	0	0	40	0	8	0	0	0	0	0
ENSG00000279457.4	chr1;chr1;chr1;chr1;chr1;chr1;chr1;chr1;chr1;chr1	185217;185491;186317;187129;187376;187755;188130;188439;188791;195263	185350;185559;186469;187287;187577;187890;188266;188584;188902;195411	-;-;-;-;-;-;-;-;-;-	1397	50	15	30	15	45	70	65	22	53	8	75	55	5	79	6	20	11	25	41	45	38	62	62	12	28	74	41	13	24	41	80	42	35	36	45	29	76	35	32	21	16	30	81	113
ENSG00000273874.1	chr1	187891	187958	-	68	0	0	0	0	4	0	5	0	0	0	0	0	2	6	11	0	0	0	0	0	1	0	0	0	0	0	0	0	0	2	0	0	13	4	0	0	0	4	0	0	0	1	1	1
ENSG00000228463.10	chr1;chr1;chr1;chr1;chr1;chr1;chr1;chr1;chr1;chr1;chr1;chr1;chr1;chr1;chr1;chr1;chr1;chr1	257864;257913;258144;258524;258568;261550;263015;264604;267303;267303;268667;268667;268667;289266;297345;356685;358049;359345	259025;259025;259025;259025;259024;261634;268204;264733;268204;268204;268816;268816;268816;289370;297502;357586;358183;359681	-;-;-;-;-;-;-;-;-;-;-;-;-;-;-;-;-;-	8224	15	8	3	4	40	53	20	237	12	23	33	21	11	59	66	58	187	29	17	6	203	69	241	5	80	7	20	14	68	11	48	18	38	39	32	24	101	46	13	33	23	19	10	16
ENSG00000286448.1	chr1;chr1	266855;268122	267056;268655	+;+	736	0	0	0	0	0	0	0	69	0	6	0	0	0	0	1	18	23	5	2	0	52	0	22	0	0	0	1	0	3	0	0	0	0	3	0	0	13	0	0	1	0	0	0	12
ENSG00000236679.2	chr1	347982	348366	-	385	0	0	1	0	0	0	8	55	38	0	3	3	0	6	2	14	50	3	36	0	37	10	59	1	0	1	13	3	3	7	35	0	8	0	5	3	39	1	0	2	0	4	2	3
ENSG00000236601.2	chr1;chr1;chr1;chr1;chr1;chr1	358857;358872;360057;365171;365171;365171	358929;358957;360168;365510;366052;365704	+;+;+;+;+;+	1095	0	0	0	9	0	9	0	36	0	0	1	0	0	1	0	0	55	1	0	0	32	0	66	0	0	0	10	0	4	0	0	0	8	0	1	1	53	7	8	0	0	2	0	1
ENSG00000237094.12	chr1;chr1;chr1;chr1;chr1;chr1;chr1;chr1;chr1;chr1;chr1;chr1;chr1;chr1;chr1;chr1;chr1;chr1;chr1;chr1;chr1;chr1;chr1;chr1;chr1;chr1;chr1;chr1;chr1;chr1;chr1;chr1;chr1;chr1;chr1;chr1;chr1;chr1;chr1;chr1;chr1;chr1;chr1;chr1;chr1;chr1;chr1;chr1;chr1;chr1;chr1;chr1;chr1;chr1;chr1;chr1;chr1;chr1;chr1;chr1;chr1;chr1;chr1;chr1;chr1;chr1;chr1;chr1;chr1;chr1;chr1;chr1;chr1;chr1;chr1;chr1;chr1;chr1;chr1;chr1…	365389;365395;365615;366019;368251;373144;373182;379769;379769;476364;484832;485026;485040;485040;485066;489361;494382;494464;494475;494611;494771;494992;494992;494992;494992;494992;495277;495277;496264;497109;497109;497109;497134;497205;497210;497240;497245;497275;498047;498073;498073;498073;498281;498399;498399;498399;498399;498399;498399;498399;498399;498684;498684;498684;498684;498984;501556;…	365692;365692;365692;366151;368450;373323;373323;379870;379972;476945;485208;485208;485208;485208;485208;489553;494586;494898;494898;494898;494898;495049;495049;495049;495049;495049;495368;495476;496605;497299;497299;497259;497299;497228;497299;497299;497299;497299;498305;498305;498305;498305;498305;498456;498456;498976;498456;498456;498456;498456;498456;499175;499002;498976;499175;499369;501607;…	-;-;-;-;-;-;-;-;-;-;-;-;-;-;-;-;-;-;-;-;-;-;-;-;-;-;-;-;-;-;-;-;-;-;-;-;-;-;-;-;-;-;-;-;-;-;-;-;-;-;-;-;-;-;-;-;-;-;-;-;-;-;-;-;-;-;-;-;-;-;-;-;-;-;-;-;-;-;-;-;-;-	6204	20	17	3	10	63	8	12	35	46	30	9	25	6	59	9	56	41	18	31	17	45	43	54	8	55	4	3	40	33	65	15	5	24	57	34	5	31	13	10	10	31	10	22	3
ENSG00000269732.1	chr1	439870	440232	+	363	0	0	0	0	0	0	0	0	0	0	0	0	0	0	0	0	0	0	0	0	0	0	0	0	0	0	0	0	0	0	0	0	0	0	0	0	0	0	0	0	0	0	0	0
ENSG00000284733.1	chr1	450703	451697	-	995	0	0	0	0	0	0	0	0	0	0	0	0	0	0	0	0	0	0	0	0	0	0	0	0	0	0	0	0	0	0	0	0	0	0	0	0	0	0	0	0	0	0	0	0
ENSG00000233653.3	chr1;chr1	487101;489717	489387;489906	+;+	2477	0	0	0	0	0	0	0	0	0	0	0	0	0	0	0	0	0	0	0	0	12	0	1	0	0	0	0	1	0	0	0	0	0	1	0	0	1	0	0	0	0	0	0	0
ENSG00000250575.1	chr1;chr1	491225;492768	491989;493241	-;-	1239	1	0	0	0	0	1	0	0	0	0	0	1	0	0	0	0	2	0	0	0	0	0	4	0	8	0	0	0	3	0	0	0	0	0	0	1	4	0	0	0	2	0	0	12
ENSG00000278757.1	chr1	516376	516479	-	104	2	0	0	2	0	0	0	0	0	0	0	0	0	0	0	0	0	0	0	0	0	0	0	0	0	0	0	0	0	0	0	0	2	0	0	0	0	0	0	0	0	0	0	0
ENSG00000230021.10	chr1;chr1;chr1;chr1;chr1;chr1;chr1;chr1;chr1;chr1;chr1;chr1;chr1;chr1;chr1;chr1;chr1;chr1;chr1;chr1;chr1;chr1;chr1;chr1;chr1;chr1;chr1;chr1;chr1;chr1;chr1;chr1;chr1;chr1;chr1;chr1;chr1;chr1;chr1;chr1;chr1;chr1;chr1;chr1;chr1;chr1;chr1;chr1;chr1;chr1;chr1;chr1;chr1;chr1;chr1;chr1;chr1;chr1;chr1	586071;586278;586821;586821;586945;588117;594191;594198;594308;594308;594308;594458;594629;597299;601398;601398;601398;601398;601398;601398;601436;607955;607955;607955;607955;607955;607955;612741;612741;627377;627961;628919;628919;628919;631131;631131;633044;698927;698927;701936;703685;703685;711711;711711;711765;711867;720024;720032;720032;720032;720032;720032;720053;724358;732017;732017;732981;…	586358;586358;586955;586955;586955;588453;594756;594756;594756;594756;594756;594756;594756;598551;601577;601577;601577;601577;601577;601577;601577;608056;608056;608056;608056;608056;608056;612864;612813;627823;628223;629006;629006;629006;631150;631204;633129;698959;698959;702340;703789;703789;711922;711922;711922;711922;720206;720200;720150;720200;720200;720194;720200;724564;732212;732207;733064;…	-;-;-;-;-;-;-;-;-;-;-;-;-;-;-;-;-;-;-;-;-;-;-;-;-;-;-;-;-;-;-;-;-;-;-;-;-;-;-;-;-;-;-;-;-;-;-;-;-;-;-;-;-;-;-;-;-;-;-	5495	1	0	0	17	0	0	3	29	4	8	5	1	0	9	11	18	66	31	7	0	42	0	46	2	5	7	3	4	11	1	4	18	3	13	0	4	18	0	0	10	0	4	0	1
ENSG00000235146.2	chr1;chr1;chr1;chr1	587629;587668;594235;594235	587701;587729;594768;594574	+;+;+;+	635	0	0	0	0	0	0	0	9	0	0	0	0	0	0	0	0	0	0	0	0	3	0	0	0	0	0	0	0	0	0	0	0	0	0	0	0	3	0	0	0	0	0	0	0
ENSG00000225972.1	chr1	629062	629433	+	372	21	5	37	0	50	26	21	11	27	15	12	62	13	65	33	47	7	35	60	5	12	21	8	3	17	10	11	17	8	76	6	24	24	26	15	12	6	4	24	20	18	41	17	5
ENSG00000225630.1	chr1	629640	630683	+	1044	645	631	877	320	2605	1085	1141	408	1027	237	1202	1361	56	1298	1662	781	1126	1218	1628	539	571	1216	262	385	1642	892	881	584	625	3318	1244	1268	1049	617	374	655	277	297	680	1327	571	1309	590	609
ENSG00000237973.1	chr1	631074	632616	+	1543	684	408	691	369	3795	1784	1107	324	1063	212	2024	1291	76	1355	1271	691	285	945	2187	948	570	1420	215	517	910	758	746	588	608	1707	1820	1215	1193	870	392	1557	279	358	687	1524	1104	2333	1055	1784
ENSG00000278791.1	chr1	632325	632413	-	89	0	0	0	0	0	0	0	0	0	0	0	0	0	0	0	0	0	0	0	0	0	0	0	0	0	0	0	0	0	0	0	0	0	0	0	0	0	0	0	0	0	0	0	0
ENSG00000229344.1	chr1	632757	633438	+	682	65	122	130	30	196	77	94	39	134	4	101	194	4	104	118	85	50	102	141	65	52	100	16	58	127	38	42	29	65	80	250	49	81	40	44	76	17	35	63	126	106	324	25	82
ENSG00000240409.1	chr1	633535	633741	+	207	11	4	3	5	66	9	5	0	5	2	9	19	1	5	23	31	10	9	30	1	5	5	6	7	62	12	14	0	6	19	17	15	35	4	7	5	1	2	10	6	27	21	10	8
ENSG00000248527.1	chr1	633696	634376	+	681	3925	2437	3190	1639	17706	8827	6627	2293	4731	1732	10451	6479	346	7583	6197	5561	1374	5188	13704	4498	3303	6830	1436	2663	5111	5027	5328	3241	3873	11150	9593	5965	6084	4453	2596	5258	1643	2364	5217	8715	4749	12819	4185	5756
ENSG00000198744.5	chr1	634376	634922	+	547	58	24	105	41	313	114	107	27	95	42	69	210	5	81	257	70	17	95	137	61	32	80	3	43	74	56	67	84	64	160	48	91	108	84	55	134	18	55	61	169	97	143	56	87
ENSG00000268663.1	chr1	674842	675265	+	424	0	0	0	0	0	0	0	2	0	0	0	0	0	0	0	8	0	0	0	0	5	0	2	0	0	0	0	0	0	0	0	0	0	0	1	0	4	0	0	0	0	0	0	0
ENSG00000284662.1	chr1	685679	686673	-	995	0	0	0	0	0	0	0	0	0	0	0	0	0	0	0	18	0	0	0	0	2	0	0	0	0	0	0	0	0	0	0	0	0	0	2	0	0	0	0	0	0	0	0	0
ENSG00000229376.3	chr1;chr1	722092;724718	724360;724903	+;+	2455	2	0	0	0	2	0	0	2	12	9	9	0	3	0	1	4	16	28	0	4	19	1	21	1	0	4	9	0	0	0	13	3	15	0	8	3	2	7	3	0	0	11	16	5
ENSG00000228327.3	chr1;chr1;chr1;chr1;chr1;chr1;chr1;chr1;chr1;chr1;chr1;chr1;chr1;chr1;chr1;chr1;chr1;chr1;chr1;chr1;chr1	725885;733307;735423;743180;744195;744728;746695;756077;758967;764723;764723;765144;766329;766329;768548;768548;769497;772976;774171;774171;778284	729804;733364;735613;743350;744391;744825;746818;756141;759123;764800;765247;765247;766387;766387;768613;768613;769712;773107;774280;774280;778626	-;-;-;-;-;-;-;-;-;-;-;-;-;-;-;-;-;-;-;-;-	6432	38	10	12	58	44	53	39	55	103	28	71	18	40	85	26	54	66	47	14	75	84	46	49	27	42	73	34	58	140	73	108	75	71	39	24	45	35	26	23	42	86	74	63	115
ENSG00000223181.1	chr1	758233	758336	-	104	0	1	0	0	0	0	0	1	0	0	0	7	0	5	2	0	0	0	1	0	3	5	9	0	1	0	0	2	1	1	0	0	0	0	0	10	2	0	0	0	0	0	2	0
ENSG00000229905.1	chr1;chr1	760911;761778	761154;761989	+;+	456	2	0	0	0	1	2	0	0	0	0	0	0	0	0	0	0	1	1	0	0	0	0	3	0	0	0	0	0	10	0	0	0	0	0	0	0	0	0	0	0	0	0	0	0
ENSG00000237491.10	chr1;chr1;chr1;chr1;chr1;chr1;chr1;chr1;chr1;chr1;chr1;chr1;chr1;chr1;chr1;chr1;chr1;chr1;chr1;chr1;chr1;chr1;chr1;chr1;chr1;chr1;chr1;chr1;chr1;chr1;chr1;chr1;chr1;chr1;chr1;chr1;chr1;chr1;chr1;chr1;chr1;chr1;chr1;chr1;chr1;chr1;chr1;chr1;chr1;chr1;chr1;chr1;chr1;chr1;chr1;chr1;chr1;chr1;chr1;chr1;chr1;chr1;chr1;chr1;chr1;chr1;chr1;chr1;chr1;chr1;chr1;chr1;chr1;chr1;chr1;chr1;chr1;chr1;chr1;chr1…	778747;778747;778758;778760;778760;778770;778782;778796;778802;778809;778809;778812;778812;778849;778930;778937;778972;781937;781937;781937;781937;783111;783111;784370;784370;784370;784370;784370;784370;784370;784370;784370;784370;784370;784370;784370;784370;784396;785800;786393;786393;792882;792882;795470;795470;795470;801607;803567;803567;803567;803567;803836;803919;803919;803919;803919;803919;…	779092;779092;779092;779092;779092;779092;779092;779092;779092;779092;779092;779092;779092;779092;779092;779092;779092;782136;782043;782191;782136;783363;783363;784493;784493;784493;784493;784493;784493;784493;784759;784977;784493;784493;784429;784655;784690;784493;787672;786866;787186;793041;793041;795582;795582;795513;801876;803667;803667;803667;803667;804222;804222;804222;804222;804222;804222;…	+;+;+;+;+;+;+;+;+;+;+;+;+;+;+;+;+;+;+;+;+;+;+;+;+;+;+;+;+;+;+;+;+;+;+;+;+;+;+;+;+;+;+;+;+;+;+;+;+;+;+;+;+;+;+;+;+;+;+;+;+;+;+;+;+;+;+;+;+;+;+;+;+;+;+;+;+;+;+;+;+;+;+;+;+;+;+;+;+;+;+;+;+;+;+;+;+;+;+;+;+;+;+;+;+;+;+;+;+;+;+	8413	150	38	56	172	223	133	116	226	118	104	125	94	20	171	210	149	150	176	114	76	217	127	197	16	157	59	91	228	201	176	151	121	399	183	171	185	190	83	116	178	118	49	136	97
ENSG00000285268.1	chr1	781937	782050	+	114	0	0	0	0	0	0	0	0	0	0	0	0	0	0	0	0	0	0	0	0	0	0	0	0	0	0	0	0	0	0	0	0	0	0	0	0	0	0	0	0	0	0	0	0
ENSG00000230092.7	chr1;chr1;chr1;chr1;chr1;chr1;chr1;chr1	800879;805799;805799;808574;808574;810067;810067;817373	801163;805891;805891;808623;808623;810170;810161;817712	-;-;-;-;-;-;-;-	872	8	1	1	18	12	0	33	7	3	4	23	4	2	13	20	0	13	41	8	3	15	9	2	2	3	4	3	15	16	17	6	16	67	23	15	26	2	0	12	55	46	14	9	15
ENSG00000177757.2	chr1;chr1	817371;818723	818202;819837	+;+	1947	28	6	1	11	17	33	9	75	18	16	21	26	3	80	7	68	27	7	1	1	60	10	83	1	33	16	26	8	75	1	3	25	60	7	25	1	61	38	11	45	34	20	10	21
ENSG00000228794.10	chr1;chr1;chr1;chr1;chr1;chr1;chr1;chr1;chr1;chr1;chr1;chr1;chr1;chr1;chr1;chr1;chr1;chr1;chr1;chr1;chr1;chr1;chr1;chr1;chr1;chr1;chr1;chr1;chr1;chr1;chr1;chr1;chr1;chr1;chr1;chr1;chr1;chr1;chr1;chr1;chr1;chr1;chr1;chr1;chr1;chr1;chr1;chr1;chr1;chr1;chr1;chr1;chr1;chr1;chr1;chr1;chr1;chr1;chr1;chr1;chr1;chr1;chr1;chr1;chr1;chr1;chr1;chr1;chr1;chr1;chr1;chr1;chr1;chr1;chr1;chr1;chr1;chr1;chr1;chr1…	825138;826832;827598;827603;827604;827635;827638;827652;827652;827654;827654;827657;827663;827667;827667;827667;827673;827692;827699;827700;827771;827806;827815;827821;829003;829003;829003;829003;829003;829003;829003;829003;829003;829003;829003;829003;829003;829003;829003;829003;829003;829003;829003;829003;829003;829003;831578;831605;841200;841200;841200;841200;841200;841200;841200;841200;841200;…	825552;826923;827775;827775;827775;827775;827775;827775;827775;827775;827775;827775;827775;827775;827775;827775;827775;827775;827775;827775;827853;827849;828127;827853;829104;829104;829104;829104;829104;829104;829104;829104;829104;829104;829104;829104;829104;829104;829104;829104;829104;829104;829104;829104;829104;829104;831677;831677;842020;843594;841999;842001;841373;842001;841373;844498;846365;…	+;+;+;+;+;+;+;+;+;+;+;+;+;+;+;+;+;+;+;+;+;+;+;+;+;+;+;+;+;+;+;+;+;+;+;+;+;+;+;+;+;+;+;+;+;+;+;+;+;+;+;+;+;+;+;+;+;+;+;+;+;+;+;+;+;+;+;+;+;+;+;+;+;+;+;+;+;+;+;+;+;+;+;+;+;+;+;+;+;+;+;+;+;+;+;+;+;+;+;+;+;+;+;+;+;+;+;+;+;+;+;+;+;+;+;+;+;+;+;+;+;+;+;+;+;+	15682	294	190	120	431	350	342	456	546	353	250	468	540	60	273	645	576	413	679	491	336	837	351	744	157	366	196	407	388	413	411	408	333	505	427	284	572	438	240	410	673	303	315	299	243
ENSG00000225880.5	chr1	826206	827522	-	1317	56	8	24	64	41	61	64	34	104	1	41	115	7	64	105	36	34	41	20	27	66	39	70	2	39	30	39	107	97	66	19	43	62	97	14	31	50	22	47	51	115	21	44	23
ENSG00000288531.1	chr1;chr1;chr1;chr1;chr1	860226;860227;865260;865260;867420	861273;861273;866720;865499;868202	+;+;+;+;+	3292	0	0	0	0	0	4	0	89	0	0	0	2	0	22	0	5	19	0	0	0	140	0	146	9	3	11	18	0	37	0	0	0	3	0	6	0	85	0	4	1	14	6	0	0
ENSG00000230368.2	chr1;chr1;chr1;chr1;chr1;chr1;chr1;chr1;chr1;chr1	868071;868240;868403;868627;869528;870086;874112;875040;876746;876746	868675;868530;868675;868675;869575;870201;875155;875155;876802;876903	-;-;-;-;-;-;-;-;-;-	1971	0	0	0	0	0	0	0	19	0	3	0	1	0	11	8	19	8	4	0	0	5	0	43	0	0	2	0	0	16	1	0	1	13	0	2	0	11	0	0	0	0	0	0	1
ENSG00000234711.1	chr1	873292	874349	+	1058	0	0	0	0	0	5	3	12	0	0	0	0	0	3	0	9	1	0	1	0	15	2	67	0	3	0	0	0	5	0	0	0	0	0	2	0	35	0	0	0	0	0	1	0
ENSG00000283040.1	chr1;chr1;chr1;chr1;chr1	874529;875047;875526;876527;876755	874591;875155;875625;876611;877234	-;-;-;-;-	837	0	0	0	0	0	0	0	33	0	0	0	0	0	0	0	17	19	0	0	0	6	0	34	0	0	0	7	0	16	0	0	0	0	0	0	0	19	0	0	0	0	5	0	0
ENSG00000272438.1	chr1;chr1	904834;915750	904957;915976	+;+	351	0	0	2	4	0	3	0	6	0	0	0	5	2	0	0	3	0	0	4	6	8	0	25	0	3	0	12	0	0	0	3	0	0	0	0	0	30	0	0	4	0	0	0	0
ENSG00000230699.2	chr1;chr1	911435;911945	911473;914948	+;+	3043	3	5	70	10	16	24	12	31	0	5	0	214	0	3	7	78	17	55	77	4	56	2	74	2	122	3	26	12	2	27	3	16	72	42	19	2	41	3	18	44	0	0	2	1
ENSG00000241180.1	chr1;chr1	914171;914803	914444;914971	+;+	443	0	0	0	0	0	0	0	1	0	0	0	0	0	0	0	0	0	0	0	0	0	0	2	2	0	0	0	0	0	0	0	0	0	0	0	0	0	0	0	0	0	0	0	0
ENSG00000223764.2	chr1;chr1;chr1;chr1;chr1;chr1;chr1	916865;916870;917370;918022;918022;918825;919335	921016;917720;917486;918110;918534;918915;919692	-;-;-;-;-;-;-	4152	60	26	269	21	17	13	153	106	12	128	51	496	49	21	38	530	74	73	5	113	138	49	235	135	9	62	318	146	10	58	15	205	282	180	76	36	160	62	73	226	10	14	143	10
ENSG00000187634.12	chr1;chr1;chr1;chr1;chr1;chr1;chr1;chr1;chr1;chr1;chr1;chr1;chr1;chr1;chr1;chr1;chr1;chr1;chr1;chr1;chr1;chr1;chr1;chr1;chr1;chr1;chr1;chr1;chr1;chr1;chr1;chr1;chr1;chr1;chr1;chr1;chr1;chr1;chr1;chr1;chr1;chr1;chr1;chr1;chr1;chr1;chr1;chr1;chr1;chr1;chr1;chr1;chr1;chr1;chr1;chr1;chr1;chr1;chr1;chr1;chr1;chr1;chr1;chr1;chr1;chr1;chr1;chr1;chr1;chr1;chr1;chr1;chr1;chr1;chr1;chr1;chr1;chr1;chr1;chr1…	923928;925150;925731;925741;925741;925741;925741;925741;925741;925741;925741;925922;925922;925922;925922;925922;925922;925922;925922;925922;925922;925922;930155;930155;930155;930155;930155;930155;930155;930155;930155;930155;930155;930312;931039;931039;931039;931039;931039;931039;931039;931039;931039;931039;931039;935772;935772;935772;935772;935772;935772;935772;935772;935772;935772;935772;939040;…	924948;925189;925800;925800;925800;925800;925800;925800;925800;925800;925800;926013;926013;926013;926013;926013;926013;926013;926013;926013;926013;926013;930336;930336;930336;930336;930336;930336;930336;930336;930336;930336;930336;930336;931089;931089;931089;931089;931089;931089;931089;931089;931089;931089;931089;935896;935896;935896;935896;935896;935805;935896;935896;935896;935793;935896;939129;…	+;+;+;+;+;+;+;+;+;+;+;+;+;+;+;+;+;+;+;+;+;+;+;+;+;+;+;+;+;+;+;+;+;+;+;+;+;+;+;+;+;+;+;+;+;+;+;+;+;+;+;+;+;+;+;+;+;+;+;+;+;+;+;+;+;+;+;+;+;+;+;+;+;+;+;+;+;+;+;+;+;+;+;+;+;+;+;+;+;+;+;+;+;+;+;+;+;+;+;+;+;+;+;+;+;+;+;+;+;+;+;+;+;+;+;+;+;+;+;+;+;+;+;+;+;+;+;+;+;+;+;+;+;+;+;+;+;+;+;+;+;+;+;+;+;+;+;+;+;+;+;+;+	4173	95	11	230	72	28	30	111	93	38	488	140	402	84	54	49	317	49	10	36	88	122	57	183	106	41	63	249	148	28	117	4	276	188	167	57	54	86	188	71	233	25	11	139	47
ENSG00000188976.11	chr1;chr1;chr1;chr1;chr1;chr1;chr1;chr1;chr1;chr1;chr1;chr1;chr1;chr1;chr1;chr1;chr1;chr1;chr1;chr1;chr1;chr1;chr1;chr1;chr1;chr1;chr1;chr1;chr1;chr1;chr1;chr1;chr1;chr1;chr1;chr1;chr1;chr1;chr1;chr1;chr1;chr1;chr1;chr1;chr1;chr1;chr1;chr1;chr1;chr1;chr1;chr1	944203;944204;944205;945042;945042;945057;945319;945518;945518;945518;945518;946173;946173;946173;946402;946402;946402;948131;948131;948490;948490;951127;951127;952000;952000;952412;952412;953175;953175;953782;953782;954004;954004;954426;955923;955923;955923;956095;956095;956095;956894;956894;956894;957099;957099;957099;958246;958929;958929;959215;959215;959215	944800;944800;944800;945146;945146;945146;945422;945562;945653;945653;945653;946286;946286;946286;946545;947060;946545;948232;948232;948603;948603;951238;951238;952139;952139;952600;952600;953288;953288;953892;953892;954523;954082;954523;956013;956013;956013;956215;956215;956215;957025;957025;957025;957273;958458;957273;959081;959081;959081;959256;959309;959256	-;-;-;-;-;-;-;-;-;-;-;-;-;-;-;-;-;-;-;-;-;-;-;-;-;-;-;-;-;-;-;-;-;-;-;-;-;-;-;-;-;-;-;-;-;-;-;-;-;-;-;-	5540	586	252	285	398	949	897	654	361	624	509	1030	847	255	717	817	451	263	446	587	640	499	645	356	268	1630	560	700	575	551	546	473	529	798	741	237	607	407	461	339	1015	497	524	736	450
ENSG00000187961.14	chr1;chr1;chr1;chr1;chr1;chr1;chr1;chr1;chr1;chr1;chr1;chr1;chr1;chr1;chr1;chr1;chr1;chr1;chr1;chr1;chr1;chr1;chr1;chr1;chr1;chr1;chr1;chr1;chr1;chr1;chr1	960584;960639;961293;961449;961629;961826;961826;962082;962355;962704;962704;962727;963032;963109;963109;963337;963337;963337;963552;963920;963920;963920;964107;964107;964107;964107;964349;964349;964349;964963;964963	960800;960699;961552;961750;961750;962478;962047;962471;962471;962917;962917;962917;963253;963253;963253;963504;963504;963504;964008;964008;964008;964008;964167;964164;964167;964180;964530;964530;964530;965602;965719	+;+;+;+;+;+;+;+;+;+;+;+;+;+;+;+;+;+;+;+;+;+;+;+;+;+;+;+;+;+;+	3402	88	18	32	59	99	146	116	130	141	136	204	68	21	115	142	86	47	61	104	62	229	186	248	45	96	123	90	53	66	48	225	62	116	146	77	140	180	54	78	111	25	75	85	104
ENSG00000187583.11	chr1;chr1;chr1;chr1;chr1;chr1;chr1;chr1;chr1;chr1;chr1;chr1;chr1;chr1;chr1;chr1;chr1;chr1;chr1;chr1;chr1;chr1;chr1;chr1;chr1;chr1;chr1;chr1;chr1;chr1;chr1;chr1;chr1;chr1;chr1;chr1;chr1;chr1;chr1;chr1;chr1;chr1;chr1;chr1;chr1;chr1;chr1;chr1;chr1;chr1;chr1;chr1;chr1;chr1	966482;966502;966502;966704;966704;966704;970277;970277;970277;970521;970521;970521;970686;970686;970686;970875;970879;970879;971077;971077;971077;971113;971324;971324;971324;971324;972075;972075;972075;972288;972288;972288;972861;972861;972861;973186;973186;973500;973500;973500;973512;973833;973833;973833;973833;974316;974316;974316;974316;974442;974442;974442;974442;975712	966614;966614;966614;966803;966803;966803;970423;970423;970423;970601;970601;970601;970758;971006;970758;971006;971006;971006;971208;971208;971208;971208;971523;971404;971404;971404;972150;972150;972150;972424;972424;972424;973010;973010;973010;973326;973326;973640;973640;973640;973640;974051;974051;974051;974051;974364;974364;974364;974364;974588;975008;975008;975865;975865	+;+;+;+;+;+;+;+;+;+;+;+;+;+;+;+;+;+;+;+;+;+;+;+;+;+;+;+;+;+;+;+;+;+;+;+;+;+;+;+;+;+;+;+;+;+;+;+;+;+;+;+;+;+	3451	189	47	145	101	84	151	128	120	255	111	117	140	117	207	124	157	79	94	106	199	193	155	184	94	310	165	186	83	71	86	253	37	195	164	92	116	163	51	42	128	96	59	154	101
ENSG00000187642.9	chr1;chr1;chr1;chr1;chr1;chr1;chr1;chr1;chr1;chr1	975204;975205;975205;976499;976499;976499;978881;978881;981137;982065	976269;976269;976269;976624;976624;976641;981029;980657;981173;982093	-;-;-;-;-;-;-;-;-;-	3424	14	4	6	5	3	0	23	47	68	61	2	118	32	33	5	53	26	22	3	0	75	24	154	9	3	14	43	5	21	7	47	9	13	23	26	1	55	31	128	65	2	0	38	20
ENSG00000272512.1	chr1	995966	998051	-	2086	40	40	87	30	1	40	99	80	79	13	42	105	16	88	82	45	36	112	50	18	59	134	98	18	88	133	153	126	41	52	402	138	119	58	5	99	70	46	91	29	57	4	82	25
ENSG00000188290.11	chr1;chr1;chr1;chr1;chr1;chr1;chr1;chr1;chr1;chr1;chr1;chr1	998962;998964;998966;998970;999526;999526;999526;999526;999692;999692;999866;999866	999432;999432;999432;999432;999613;1000096;999613;999613;999787;1000172;999981;1000097	-;-;-;-;-;-;-;-;-;-;-;-	1118	107	18	25	33	69	78	149	43	201	154	109	225	79	47	37	37	16	132	86	147	55	209	40	94	252	177	219	85	30	67	251	178	116	90	47	136	37	37	68	11	67	52	150	73
ENSG00000187608.10	chr1;chr1;chr1;chr1;chr1;chr1;chr1;chr1	1001138;1001145;1008194;1008194;1013497;1013984;1013984;1013984	1001281;1001263;1008279;1008279;1013576;1014540;1014435;1014540	+;+;+;+;+;+;+;+	867	83	39	100	55	117	581	72	75	31	28	752	293	26	54	97	117	48	328	57	100	192	133	152	50	1723	76	52	49	12	18	1435	31	186	104	24	29	148	57	84	107	49	74	33	144
ENSG00000231702.2	chr1	1008076	1008229	-	154	0	0	1	0	0	5	6	11	0	0	26	4	0	0	3	9	34	4	0	1	14	0	29	3	12	0	2	0	0	0	1	0	0	1	0	0	7	0	0	0	0	0	0	0
ENSG00000224969.1	chr1;chr1	1011997;1012917	1012190;1013193	-;-	471	0	0	0	0	0	0	0	23	5	1	3	1	0	0	0	1	31	1	0	0	3	5	30	0	1	0	17	0	4	1	29	5	1	0	0	0	17	0	0	0	0	6	7	0
ENSG00000188157.15	chr1;chr1;chr1;chr1;chr1;chr1;chr1;chr1;chr1;chr1;chr1;chr1;chr1;chr1;chr1;chr1;chr1;chr1;chr1;chr1;chr1;chr1;chr1;chr1;chr1;chr1;chr1;chr1;chr1;chr1;chr1;chr1;chr1;chr1;chr1;chr1;chr1;chr1;chr1;chr1;chr1;chr1;chr1;chr1;chr1;chr1;chr1;chr1;chr1;chr1;chr1;chr1;chr1;chr1;chr1;chr1;chr1;chr1;chr1;chr1;chr1;chr1;chr1;chr1;chr1;chr1;chr1;chr1;chr1;chr1;chr1;chr1;chr1;chr1;chr1;chr1;chr1;chr1;chr1;chr1…	1020120;1020123;1022201;1022201;1034106;1034106;1034867;1035277;1035277;1035277;1035277;1040665;1040665;1040665;1040665;1040665;1041173;1041173;1041173;1041173;1041173;1041478;1041478;1041478;1041478;1041956;1041956;1041956;1041956;1043239;1043239;1043239;1043239;1043538;1043538;1043538;1043538;1043823;1043823;1043823;1043823;1044109;1044109;1044109;1044109;1044334;1044334;1044334;1044334;1045161…	1020373;1020373;1022462;1022462;1034703;1034703;1035324;1035324;1035324;1035324;1035324;1040880;1040880;1040880;1040880;1040880;1041397;1041397;1041397;1041397;1041397;1041702;1041702;1041702;1041702;1042162;1042162;1042162;1042162;1043457;1043457;1043457;1043457;1043732;1043732;1043732;1043732;1044023;1044023;1044023;1044023;1044257;1044257;1044257;1044257;1044439;1044439;1044439;1044439;1045277…	+;+;+;+;+;+;+;+;+;+;+;+;+;+;+;+;+;+;+;+;+;+;+;+;+;+;+;+;+;+;+;+;+;+;+;+;+;+;+;+;+;+;+;+;+;+;+;+;+;+;+;+;+;+;+;+;+;+;+;+;+;+;+;+;+;+;+;+;+;+;+;+;+;+;+;+;+;+;+;+;+;+;+;+;+;+;+;+;+;+;+;+;+;+;+;+;+;+;+;+;+;+;+;+;+;+;+;+;+;+;+;+;+;+;+;+;+;+;+;+;+;+;+;+;+;+;+;+;+;+;+;+;+;+;+;+;+;+;+;+;+;+;+;+;+;+;+;+;+;+;+;+;+;+;+;+;+;+;+;+;+;+;+;+;+	10761	1294	415	884	1541	1398	2564	1828	712	1087	1401	2656	3737	832	1797	1228	1107	703	1351	1668	1641	1040	2696	699	648	2634	1818	2116	1037	570	967	3843	716	1816	1185	588	1064	963	483	991	3337	915	468	849	1349
ENSG00000242590.1	chr1;chr1	1055033;1055898	1055215;1056116	+;+	402	0	0	0	0	0	0	0	0	0	0	0	0	0	0	0	0	0	0	0	0	0	0	0	0	0	0	0	0	0	0	0	0	0	0	0	0	0	0	0	0	0	0	0	0
ENSG00000217801.10	chr1;chr1;chr1;chr1;chr1;chr1;chr1;chr1;chr1;chr1;chr1;chr1;chr1;chr1;chr1;chr1;chr1;chr1;chr1;chr1;chr1;chr1;chr1;chr1;chr1	1059708;1059734;1060277;1060280;1061020;1063079;1063079;1063079;1063079;1063480;1064210;1064490;1064495;1064518;1065352;1065830;1065830;1065830;1065830;1065949;1066587;1067566;1067869;1068577;1069208	1059782;1059846;1060393;1060393;1061117;1063201;1063201;1063201;1063201;1063566;1064401;1064589;1064589;1064589;1065475;1066274;1066456;1066456;1066459;1066441;1066667;1067646;1068003;1068724;1069355	+;+;+;+;+;+;+;+;+;+;+;+;+;+;+;+;+;+;+;+;+;+;+;+;+	2203	35	16	23	34	100	36	32	130	53	12	94	127	12	181	46	89	41	28	20	10	120	99	297	43	22	18	114	11	53	15	80	0	79	74	35	19	201	12	8	120	24	10	20	105
ENSG00000273443.1	chr1;chr1	1062208;1063061	1062808;1063288	-;-	829	2	13	1	10	0	1	2	5	6	31	4	37	0	0	7	14	10	0	0	0	21	15	33	2	0	0	17	0	0	24	9	0	0	4	0	2	8	1	0	31	0	0	0	4
ENSG00000237330.3	chr1;chr1	1070967;1074016	1072575;1074306	-;-	1900	12	3	2	11	65	3	1	12	15	0	24	9	14	34	23	39	7	9	16	5	44	16	55	16	0	8	23	0	0	12	18	0	9	27	19	1	68	0	0	2	22	0	34	20
ENSG00000131591.18	chr1;chr1;chr1;chr1;chr1;chr1;chr1;chr1;chr1;chr1;chr1;chr1;chr1;chr1;chr1;chr1;chr1;chr1;chr1;chr1;chr1;chr1;chr1;chr1;chr1;chr1;chr1;chr1;chr1;chr1;chr1;chr1;chr1;chr1;chr1;chr1;chr1;chr1;chr1;chr1;chr1;chr1;chr1;chr1;chr1;chr1;chr1;chr1;chr1;chr1;chr1;chr1;chr1;chr1;chr1;chr1;chr1;chr1;chr1;chr1;chr1;chr1;chr1;chr1;chr1;chr1;chr1;chr1;chr1;chr1;chr1;chr1;chr1;chr1;chr1;chr1;chr1;chr1;chr1;chr1…	1081818;1081823;1081823;1081823;1081825;1081825;1081825;1082146;1082235;1082604;1082700;1082916;1083915;1083915;1083915;1083915;1083915;1083915;1083915;1083926;1084353;1084353;1084353;1084353;1084353;1084353;1084353;1084481;1084481;1084481;1084481;1084481;1084481;1084481;1084481;1084481;1085251;1085878;1085878;1085878;1085878;1085878;1085878;1085878;1085878;1085878;1085878;1085878;1087139;1087139…	1082987;1082987;1082987;1082987;1082987;1082987;1084506;1082253;1082987;1082987;1082987;1082987;1084011;1084383;1084072;1084086;1084383;1084086;1084383;1084086;1084383;1084383;1084383;1084383;1084383;1084383;1084506;1084506;1084506;1084506;1084506;1084506;1084506;1084506;1084506;1084506;1085310;1086012;1086012;1086012;1086012;1086012;1086012;1086012;1086012;1086012;1086012;1086012;1087204;1087204…	-;-;-;-;-;-;-;-;-;-;-;-;-;-;-;-;-;-;-;-;-;-;-;-;-;-;-;-;-;-;-;-;-;-;-;-;-;-;-;-;-;-;-;-;-;-;-;-;-;-;-;-;-;-;-;-;-;-;-;-;-;-;-;-;-;-;-;-;-;-;-;-;-;-;-;-;-;-;-;-;-;-;-;-;-;-;-;-;-;-;-;-;-;-;-;-;-;-;-;-;-;-;-;-;-;-;-;-;-;-;-;-;-;-;-;-;-;-;-;-;-;-;-;-;-;-;-;-;-;-;-;-;-;-;-;-;-;-;-;-;-;-;-;-;-;-	6322	235	79	162	197	164	416	280	192	206	157	352	192	96	301	410	244	211	280	162	178	230	337	292	96	398	241	495	172	116	207	397	225	313	232	166	234	230	107	134	424	225	194	274	203
ENSG00000285812.1	chr1;chr1	1097585;1104033	1098113;1104598	+;+	1095	80	46	8	28	24	61	29	36	31	24	47	68	2	85	101	64	26	51	32	14	38	28	32	14	138	37	35	34	63	26	106	9	61	42	27	66	32	21	44	116	40	28	34	30
ENSG00000223823.1	chr1;chr1;chr1	1137017;1140825;1142739	1137110;1141032;1144056	+;+;+	1620	11	1	0	8	2	4	2	43	23	1	5	22	10	14	76	20	15	3	4	0	38	19	72	2	0	21	41	13	35	0	26	2	7	4	23	0	56	3	13	12	3	0	38	20
ENSG00000207730.3	chr1	1167104	1167198	+	95	5	0	3	8	5	3	4	3	29	11	13	6	0	23	37	33	0	0	2	0	5	15	11	4	0	6	2	18	5	6	7	0	0	19	18	0	5	6	0	0	0	0	11	4
ENSG00000207607.3	chr1	1167863	1167952	+	90	0	0	0	0	11	4	0	21	1	0	7	0	0	31	11	15	0	0	0	0	8	2	4	0	0	0	2	8	3	1	34	0	0	0	10	0	1	5	0	0	0	0	0	5
ENSG00000198976.1	chr1	1169005	1169087	+	83	0	0	1	0	1	0	1	9	1	0	2	34	9	18	31	20	8	19	2	0	19	5	7	0	1	10	18	1	13	6	24	0	0	40	7	2	4	10	0	1	5	0	0	1
ENSG00000272141.1	chr1	1169357	1170343	+	987	59	32	20	37	34	119	34	129	234	31	221	137	15	197	227	133	55	64	48	0	47	84	69	25	78	31	145	66	169	91	126	28	43	81	70	59	86	54	40	74	25	0	69	82
ENSG00000205231.1	chr1;chr1	1173056;1179365	1176396;1179555	-;-	3532	5	1	12	1	7	31	2	23	35	13	55	29	1	28	3	13	9	43	6	10	84	16	66	2	16	19	18	8	23	8	4	0	14	15	13	0	57	0	7	9	2	2	4	3
ENSG00000162571.14	chr1;chr1;chr1;chr1;chr1;chr1;chr1;chr1;chr1;chr1;chr1;chr1;chr1;chr1;chr1;chr1;chr1;chr1;chr1;chr1;chr1;chr1;chr1;chr1;chr1;chr1;chr1;chr1;chr1;chr1;chr1;chr1;chr1;chr1;chr1;chr1;chr1;chr1;chr1;chr1;chr1;chr1;chr1;chr1;chr1;chr1;chr1;chr1;chr1;chr1;chr1;chr1;chr1;chr1;chr1;chr1;chr1;chr1;chr1;chr1;chr1	1173880;1173880;1173884;1173898;1174216;1174266;1174285;1174424;1174424;1174424;1174521;1179189;1179189;1179189;1179657;1179657;1179657;1179697;1180034;1180034;1180034;1180034;1180483;1180483;1180483;1180484;1180537;1180731;1180731;1180731;1180731;1181741;1181741;1181741;1181741;1182361;1182361;1182361;1182361;1182876;1182876;1182876;1182876;1183920;1183920;1183920;1183920;1184969;1184969;1184969…	1173926;1173926;1173926;1173926;1174321;1174321;1174321;1174489;1174489;1174489;1175034;1179333;1179333;1179333;1179737;1179737;1179737;1179853;1180174;1180340;1180340;1180340;1180601;1180601;1180601;1180860;1180601;1180884;1180860;1180860;1180860;1181815;1181815;1181815;1181815;1182446;1182446;1182446;1182446;1183047;1183047;1183047;1183047;1183927;1184091;1184091;1184091;1185864;1185109;1185109…	+;+;+;+;+;+;+;+;+;+;+;+;+;+;+;+;+;+;+;+;+;+;+;+;+;+;+;+;+;+;+;+;+;+;+;+;+;+;+;+;+;+;+;+;+;+;+;+;+;+;+;+;+;+;+;+;+;+;+;+;+	3998	29	4	17	1	22	41	6	103	15	36	23	7	12	16	8	95	103	13	49	13	149	23	251	3	49	46	58	9	48	31	17	3	11	29	15	4	152	11	2	4	1	4	46	12
ENSG00000186891.14	chr1;chr1;chr1;chr1;chr1;chr1;chr1;chr1;chr1;chr1;chr1;chr1;chr1;chr1;chr1;chr1;chr1;chr1	1203508;1203508;1203844;1203844;1204034;1204034;1204055;1204399;1204399;1204399;1204399;1205370;1205370;1205370;1205370;1206385;1206385;1206385	1203968;1203960;1203968;1203968;1204236;1204236;1204236;1204486;1204486;1204486;1204486;1205492;1205680;1205492;1205492;1206571;1206571;1206592	-;-;-;-;-;-;-;-;-;-;-;-;-;-;-;-;-;-	1271	25	0	21	7	5	135	19	18	63	5	0	8	3	8	8	3	23	5	1	42	50	20	60	26	30	28	15	16	0	1	81	25	46	44	11	32	40	8	24	1	7	32	11	10
ENSG00000186827.11	chr1;chr1;chr1;chr1;chr1;chr1;chr1;chr1;chr1;chr1;chr1;chr1;chr1;chr1;chr1;chr1	1211340;1211340;1211704;1211942;1211942;1212019;1212638;1212638;1212638;1212992;1212992;1212992;1213395;1213663;1213983;1213983	1211625;1211832;1211832;1212138;1212138;1212138;1212704;1212704;1212704;1213093;1213093;1213785;1213498;1213785;1214138;1214153	-;-;-;-;-;-;-;-;-;-;-;-;-;-;-;-	1722	8	1	7	13	6	59	31	18	7	54	13	16	9	11	47	29	21	24	13	50	50	29	83	20	27	25	34	2	11	10	51	30	9	44	34	61	48	14	30	8	10	30	24	14
ENSG00000078808.19	chr1;chr1;chr1;chr1;chr1;chr1;chr1;chr1;chr1;chr1;chr1;chr1;chr1;chr1;chr1;chr1;chr1;chr1;chr1;chr1;chr1;chr1;chr1;chr1;chr1;chr1;chr1;chr1;chr1;chr1;chr1;chr1;chr1;chr1;chr1;chr1;chr1;chr1;chr1;chr1;chr1	1216909;1216931;1216931;1216931;1216932;1216934;1218458;1218458;1218458;1218458;1218458;1218458;1218523;1218769;1218769;1218769;1218769;1218769;1218769;1223244;1223244;1223244;1223244;1223244;1223832;1223832;1223832;1223832;1223832;1227272;1228468;1228468;1228468;1228468;1228468;1228468;1231892;1231892;1231892;1231892;1231892	1217804;1217804;1217804;1217688;1217688;1217688;1220293;1218633;1218633;1218633;1218633;1218633;1218633;1219005;1218927;1221351;1218943;1218927;1218927;1223357;1223357;1223357;1223357;1223357;1223968;1223968;1223968;1223968;1223968;1227319;1228946;1228596;1228946;1228946;1228946;1228946;1231968;1232031;1232031;1232001;1232067	-;-;-;-;-;-;-;-;-;-;-;-;-;-;-;-;-;-;-;-;-;-;-;-;-;-;-;-;-;-;-;-;-;-;-;-;-;-;-;-;-	4744	783	232	317	537	1457	1563	1343	381	958	992	1735	1113	357	1572	685	662	446	628	739	1043	517	946	279	332	1704	1057	1128	794	914	764	1249	946	1039	1071	509	975	374	655	754	705	804	921	820	846
ENSG00000176022.7	chr1	1232237	1235041	+	2805	249	50	96	155	449	197	311	237	339	71	326	218	68	396	239	156	154	135	123	131	233	226	265	58	351	197	207	92	461	177	928	63	222	171	165	120	165	85	213	220	154	130	130	165
ENSG00000184163.3	chr1;chr1;chr1;chr1;chr1;chr1;chr1;chr1;chr1;chr1;chr1;chr1;chr1;chr1;chr1;chr1;chr1;chr1	1242446;1242449;1242453;1242835;1242835;1242835;1243062;1243062;1243266;1243444;1243954;1243954;1243981;1244191;1244381;1244381;1244381;1246514	1242646;1242646;1242646;1242913;1242913;1243158;1243152;1243463;1243552;1243552;1244275;1244105;1244275;1244275;1244724;1244418;1244497;1246722	-;-;-;-;-;-;-;-;-;-;-;-;-;-;-;-;-;-	1794	5	1	4	4	40	19	10	15	5	24	28	15	1	14	13	2	1	9	26	2	48	17	62	0	75	5	11	13	18	10	10	13	6	7	14	19	44	12	17	87	20	12	20	33
ENSG00000260179.1	chr1	1249777	1251334	-	1558	38	1	4	35	41	21	18	28	39	65	46	32	18	40	30	1	40	15	3	6	57	42	41	3	3	4	47	150	57	30	21	13	25	13	22	52	26	12	5	33	17	8	68	5
ENSG00000160087.21	chr1;chr1;chr1;chr1;chr1;chr1;chr1;chr1;chr1;chr1;chr1;chr1;chr1;chr1;chr1;chr1;chr1;chr1;chr1;chr1;chr1;chr1;chr1;chr1;chr1;chr1;chr1;chr1;chr1;chr1;chr1;chr1;chr1;chr1;chr1;chr1;chr1;chr1;chr1;chr1;chr1;chr1;chr1;chr1;chr1;chr1;chr1;chr1;chr1;chr1;chr1;chr1;chr1;chr1;chr1;chr1;chr1;chr1;chr1;chr1;chr1;chr1;chr1;chr1;chr1;chr1;chr1;chr1;chr1;chr1;chr1;chr1;chr1;chr1;chr1;chr1;chr1;chr1;chr1;chr1…	1253909;1253912;1253914;1254985;1255048;1255164;1255178;1255264;1255268;1255395;1255439;1256045;1256045;1256045;1256045;1256045;1256045;1256045;1256045;1256045;1256045;1256045;1256049;1256992;1256992;1256992;1256992;1256992;1256992;1256992;1256992;1256992;1256992;1256992;1256992;1257011;1257049;1257122;1257208;1257208;1257208;1257208;1257208;1257208;1257208;1257208;1257208;1257208;1257208;1257208…	1255487;1255487;1255487;1255487;1255487;1255487;1255487;1255487;1255487;1255487;1255487;1256125;1256125;1256125;1256335;1256125;1256125;1256125;1256125;1256125;1256125;1256125;1256125;1257130;1257130;1257130;1257130;1257130;1257130;1257130;1257130;1257130;1257130;1257130;1257130;1257130;1257130;1257130;1257310;1257310;1257310;1257310;1257310;1257310;1257310;1257310;1257310;1257310;1257310;1257310…	-;-;-;-;-;-;-;-;-;-;-;-;-;-;-;-;-;-;-;-;-;-;-;-;-;-;-;-;-;-;-;-;-;-;-;-;-;-;-;-;-;-;-;-;-;-;-;-;-;-;-;-;-;-;-;-;-;-;-;-;-;-;-;-;-;-;-;-;-;-;-;-;-;-;-;-;-;-;-;-;-;-;-;-;-;-;-;-;-;-;-;-;-;-;-;-;-;-;-;-;-;-;-;-;-;-;-;-;-;-;-;-	4691	422	217	150	236	579	733	397	282	335	262	752	365	134	681	562	297	196	427	188	431	314	298	286	146	960	309	451	347	379	306	438	263	435	445	198	406	281	271	182	520	300	317	346	400
ENSG00000230415.1	chr1;chr1;chr1;chr1;chr1	1275223;1275237;1279068;1279068;1280311	1275299;1275299;1279393;1279148;1280420	+;+;+;+;+	513	21	0	4	20	0	45	16	11	21	24	35	5	3	59	12	43	8	1	18	3	12	6	18	5	0	22	63	5	10	7	69	17	19	21	33	19	16	7	35	35	3	4	28	13
ENSG00000162572.21	chr1;chr1;chr1;chr1;chr1;chr1;chr1;chr1;chr1;chr1;chr1;chr1;chr1;chr1;chr1;chr1;chr1;chr1;chr1;chr1;chr1;chr1;chr1;chr1;chr1;chr1;chr1;chr1;chr1;chr1;chr1;chr1;chr1;chr1;chr1;chr1;chr1;chr1;chr1;chr1;chr1;chr1;chr1;chr1;chr1;chr1;chr1;chr1;chr1;chr1;chr1;chr1;chr1;chr1;chr1;chr1;chr1;chr1;chr1;chr1;chr1;chr1;chr1;chr1;chr1;chr1;chr1;chr1;chr1;chr1;chr1;chr1;chr1;chr1;chr1;chr1;chr1;chr1;chr1;chr1…	1280436;1280472;1280588;1281224;1281226;1281226;1281411;1281411;1281411;1281925;1282109;1282117;1282164;1282242;1282242;1282242;1282242;1282276;1283978;1283978;1283978;1283978;1283978;1283978;1283978;1285571;1285571;1285571;1285926;1285926;1285926;1285926;1285926;1285926;1286768;1286768;1286768;1286768;1286768;1287109;1287109;1287109;1287109;1287109;1287109;1287508;1287508;1287508;1287508;1287508…	1280666;1280666;1281610;1281297;1281297;1281297;1281610;1281610;1281610;1282010;1282315;1282319;1282187;1282315;1282315;1282315;1282315;1282315;1284090;1284090;1284090;1284090;1284090;1284090;1284090;1285597;1285664;1285664;1286168;1286278;1286278;1286278;1286278;1286278;1286975;1286975;1286975;1286975;1286975;1287299;1287299;1287299;1287299;1287299;1287299;1287836;1287596;1287596;1287596;1287596…	+;+;+;+;+;+;+;+;+;+;+;+;+;+;+;+;+;+;+;+;+;+;+;+;+;+;+;+;+;+;+;+;+;+;+;+;+;+;+;+;+;+;+;+;+;+;+;+;+;+;+;+;+;+;+;+;+;+;+;+;+;+;+;+;+;+;+;+;+;+;+;+;+;+;+;+;+;+;+;+;+;+;+;+;+;+;+;+;+;+;+;+;+;+;+;+	4025	175	13	45	99	170	175	113	135	166	98	290	83	37	148	128	114	59	107	37	86	182	181	305	24	36	153	308	175	85	113	444	149	132	65	75	154	184	52	135	212	81	70	218	101
ENSG00000131584.19	chr1;chr1;chr1;chr1;chr1;chr1;chr1;chr1;chr1;chr1;chr1;chr1;chr1;chr1;chr1;chr1;chr1;chr1;chr1;chr1;chr1;chr1;chr1;chr1;chr1;chr1;chr1;chr1;chr1;chr1;chr1;chr1;chr1;chr1;chr1;chr1;chr1;chr1;chr1;chr1;chr1;chr1;chr1;chr1;chr1;chr1;chr1;chr1;chr1;chr1;chr1;chr1;chr1;chr1;chr1;chr1;chr1;chr1;chr1;chr1;chr1;chr1;chr1;chr1;chr1;chr1;chr1;chr1;chr1;chr1;chr1;chr1;chr1;chr1;chr1;chr1;chr1;chr1;chr1;chr1…	1292390;1292391;1292870;1293564;1293823;1293823;1293823;1293823;1294090;1294090;1294090;1294090;1294402;1294402;1294402;1294402;1294499;1294718;1294718;1294718;1295447;1295447;1295447;1295447;1295736;1295736;1295736;1295736;1296015;1296015;1296015;1296015;1296211;1296211;1296211;1296211;1296425;1296425;1296425;1296425;1296436;1296466;1297822;1297822;1297822;1297822;1297822;1297822;1297837;1298013…	1293708;1293708;1293708;1293708;1293933;1293933;1293933;1293933;1294199;1294199;1294199;1294199;1294628;1294628;1294628;1294628;1294628;1295008;1294816;1294816;1295554;1295554;1295554;1295554;1295938;1295938;1295938;1295938;1296109;1296109;1296109;1296109;1296280;1296280;1296280;1296280;1296633;1296633;1296633;1296633;1296633;1296633;1297933;1297933;1297933;1297933;1297933;1297933;1297933;1298241…	-;-;-;-;-;-;-;-;-;-;-;-;-;-;-;-;-;-;-;-;-;-;-;-;-;-;-;-;-;-;-;-;-;-;-;-;-;-;-;-;-;-;-;-;-;-;-;-;-;-;-;-;-;-;-;-;-;-;-;-;-;-;-;-;-;-;-;-;-;-;-;-;-;-;-;-;-;-;-;-;-;-;-;-;-;-;-;-;-;-;-;-;-;-;-;-;-;-;-;-;-;-;-;-;-;-;-;-;-;-;-;-;-;-;-;-;-;-;-;-;-;-;-;-	8707	810	269	619	396	1293	1456	929	469	662	1142	2221	981	407	862	831	846	272	437	833	933	667	861	603	360	639	1042	1506	604	474	684	1078	833	963	978	441	861	558	731	758	1366	564	534	649	669
ENSG00000278073.1	chr1	1296110	1296170	-	61	0	0	0	0	0	0	0	8	0	0	0	0	0	0	0	0	0	0	0	0	0	0	3	0	0	0	0	0	0	7	0	0	0	0	0	0	0	0	0	0	0	0	0	0
ENSG00000169972.12	chr1;chr1;chr1;chr1;chr1;chr1;chr1;chr1;chr1;chr1;chr1;chr1;chr1;chr1;chr1;chr1;chr1;chr1;chr1;chr1;chr1;chr1;chr1;chr1;chr1;chr1	1308597;1308611;1308788;1308821;1308915;1309086;1309086;1309086;1309086;1309235;1309454;1309454;1309454;1309454;1309681;1309681;1309706;1310036;1310634;1310634;1310634;1310909;1310909;1310909;1311330;1311330	1308720;1308720;1308972;1308972;1308972;1309273;1309273;1309840;1309273;1309273;1309603;1309814;1309603;1309603;1309851;1309851;1309851;1311071;1310688;1310688;1310688;1311069;1311028;1311071;1311676;1311677	+;+;+;+;+;+;+;+;+;+;+;+;+;+;+;+;+;+;+;+;+;+;+;+;+;+	2459	80	59	41	77	175	169	53	79	62	111	381	89	46	132	76	75	42	129	160	103	91	86	127	50	65	117	136	31	66	87	145	86	71	76	64	85	77	66	46	184	44	71	35	53
ENSG00000127054.21	chr1;chr1;chr1;chr1;chr1;chr1;chr1;chr1;chr1;chr1;chr1;chr1;chr1;chr1;chr1;chr1;chr1;chr1;chr1;chr1;chr1;chr1;chr1;chr1;chr1;chr1;chr1;chr1;chr1;chr1;chr1;chr1;chr1;chr1;chr1;chr1;chr1;chr1;chr1;chr1;chr1;chr1;chr1;chr1;chr1;chr1;chr1;chr1;chr1;chr1;chr1;chr1;chr1;chr1;chr1;chr1;chr1;chr1;chr1;chr1;chr1;chr1;chr1;chr1;chr1;chr1;chr1;chr1;chr1;chr1;chr1;chr1;chr1;chr1;chr1;chr1;chr1;chr1;chr1;chr1…	1311585;1311585;1311585;1311585;1311585;1311598;1311600;1311600;1311601;1311602;1311606;1311606;1311606;1311606;1311627;1311819;1311823;1312018;1312018;1312018;1312018;1312018;1312018;1312018;1312018;1312018;1312018;1312018;1312018;1312018;1312018;1312018;1312018;1312018;1312080;1312226;1312226;1312226;1312226;1312226;1312226;1312226;1312226;1312226;1312226;1312226;1312226;1312226;1312226;1312226…	1311924;1311924;1311924;1311924;1311924;1311924;1311924;1311924;1311924;1311924;1311924;1311924;1311924;1311924;1311924;1311924;1311924;1312147;1312147;1312147;1312147;1312147;1312147;1312147;1312147;1312147;1312147;1312147;1312147;1312147;1312147;1312147;1312147;1312147;1312147;1312501;1312368;1312368;1312368;1312368;1312368;1312368;1312501;1312368;1312368;1312368;1312368;1312356;1312700;1312368…	-;-;-;-;-;-;-;-;-;-;-;-;-;-;-;-;-;-;-;-;-;-;-;-;-;-;-;-;-;-;-;-;-;-;-;-;-;-;-;-;-;-;-;-;-;-;-;-;-;-;-;-;-;-;-;-;-;-;-;-;-;-;-;-;-;-;-;-;-;-;-;-;-;-;-;-;-;-;-;-;-;-;-;-;-;-;-;-;-;-;-;-;-;-;-;-;-;-;-;-;-;-;-;-;-;-;-;-;-;-;-;-;-;-;-;-;-;-;-;-;-;-;-;-;-;-;-;-;-;-;-;-;-;-;-;-;-;-;-;-;-;-;-;-;-;-;-;-;-;-;-;-;-;-;-;-;-;-;-;-;-;-;-;-;-;-;-;-;-;-;-;-;-;-;-;-;-;-;-;-;-;-;-;-;-;-;-;-;-;-;-;-;-;-;-;-;-;-;-;-…	8216	939	235	396	552	1259	1522	1246	494	1144	696	1656	769	429	1284	1072	713	351	713	619	991	582	1042	524	258	1078	1126	1070	843	804	795	1310	835	969	931	530	961	518	651	526	1158	538	933	974	694
ENSG00000283712.1	chr1	1312502	1312566	-	65	0	0	0	0	0	0	0	0	0	0	0	0	0	0	0	0	0	0	0	0	0	0	0	0	0	0	0	0	0	0	0	0	0	0	0	0	0	0	0	0	0	0	0	0
ENSG00000240731.1	chr1;chr1	1317581;1318623	1317899;1318689	-;-	386	49	4	18	29	32	43	21	28	67	23	92	29	31	54	72	14	27	22	26	43	27	24	4	5	31	25	40	40	36	4	51	38	16	45	7	49	20	7	21	51	45	10	50	43
ENSG00000224051.7	chr1;chr1;chr1;chr1;chr1;chr1;chr1;chr1	1324756;1324802;1325241;1326836;1326836;1327241;1327241;1327241	1325102;1325102;1325595;1327032;1327032;1327471;1327994;1328896	+;+;+;+;+;+;+;+	2555	150	65	35	49	149	233	153	70	139	85	446	129	64	109	87	138	94	40	93	156	90	145	112	48	82	150	168	75	78	76	91	130	137	115	75	232	122	45	94	184	82	143	119	115
ENSG00000169962.5	chr1;chr1;chr1;chr1;chr1;chr1	1331280;1331638;1332024;1332921;1333259;1333506	1331536;1331938;1332806;1333124;1333379;1335314	+;+;+;+;+;+	3475	75	1	5	72	61	40	14	76	68	105	113	66	16	81	189	137	103	52	12	96	99	66	155	18	11	42	62	78	19	79	61	75	32	73	62	86	106	61	88	80	10	37	11	31
ENSG00000107404.20	chr1;chr1;chr1;chr1;chr1;chr1;chr1;chr1;chr1;chr1;chr1;chr1;chr1;chr1;chr1;chr1;chr1;chr1;chr1;chr1;chr1;chr1;chr1;chr1;chr1;chr1;chr1;chr1;chr1;chr1;chr1;chr1;chr1;chr1;chr1;chr1;chr1;chr1;chr1;chr1;chr1;chr1;chr1;chr1;chr1;chr1;chr1;chr1;chr1;chr1;chr1;chr1;chr1;chr1;chr1;chr1;chr1;chr1;chr1;chr1;chr1;chr1;chr1;chr1;chr1	1335276;1335278;1335279;1336412;1337018;1337023;1337977;1337977;1337977;1337977;1337977;1338269;1338269;1338269;1338269;1338269;1338334;1338522;1338522;1338522;1338522;1338522;1339287;1339287;1339287;1339362;1339362;1339492;1339582;1339582;1339582;1339736;1339736;1339736;1339736;1340038;1340038;1340038;1340038;1340038;1340247;1340247;1340247;1340410;1340410;1340459;1341667;1341667;1341667;1341770…	1336515;1336515;1336515;1336515;1337055;1337055;1338183;1338183;1338183;1338183;1338183;1338436;1338436;1338372;1338436;1338436;1338436;1338653;1338653;1338653;1338653;1338653;1339649;1339422;1339439;1339439;1339439;1339812;1339649;1339649;1339649;1339812;1339812;1339812;1339812;1340177;1340190;1340052;1340177;1340177;1340365;1340316;1340316;1340503;1340503;1340503;1341805;1341805;1341805;1342156…	-;-;-;-;-;-;-;-;-;-;-;-;-;-;-;-;-;-;-;-;-;-;-;-;-;-;-;-;-;-;-;-;-;-;-;-;-;-;-;-;-;-;-;-;-;-;-;-;-;-;-;-;-;-;-;-;-;-;-;-;-;-;-;-;-	3882	378	117	197	225	1032	750	425	181	509	551	1356	545	198	728	461	372	125	184	277	308	228	551	236	177	450	555	490	387	247	479	302	338	353	338	187	378	318	313	440	720	267	467	441	354
ENSG00000284372.1	chr1	1339650	1339708	-	59	0	0	0	0	0	0	0	0	0	0	0	0	0	0	0	0	0	0	0	0	0	0	0	0	0	0	0	0	0	0	0	0	0	0	0	0	0	0	0	0	0	0	0	0
ENSG00000162576.17	chr1;chr1;chr1;chr1;chr1;chr1;chr1;chr1;chr1;chr1;chr1;chr1;chr1;chr1;chr1;chr1;chr1;chr1;chr1;chr1;chr1;chr1;chr1;chr1;chr1;chr1;chr1;chr1;chr1;chr1;chr1;chr1;chr1;chr1;chr1;chr1;chr1;chr1;chr1;chr1;chr1;chr1;chr1;chr1;chr1;chr1;chr1;chr1;chr1;chr1;chr1;chr1;chr1;chr1;chr1;chr1;chr1;chr1;chr1	1352689;1352689;1352691;1352692;1352692;1353192;1353215;1353439;1353848;1353848;1353848;1353848;1353848;1353848;1354030;1354030;1354030;1354030;1354030;1354030;1354030;1354030;1354193;1354193;1354193;1354193;1354193;1354193;1354193;1354193;1354354;1354354;1354354;1354354;1354354;1354682;1354682;1354682;1354682;1354682;1355004;1355083;1355244;1355244;1355244;1355244;1355244;1355450;1355450;1355450…	1353629;1353629;1353629;1353629;1353332;1353928;1353928;1353629;1353928;1353928;1353946;1353928;1353928;1353928;1354106;1354106;1354106;1354106;1354106;1354106;1354106;1354106;1354509;1354247;1354232;1354232;1354232;1354232;1354232;1354264;1354509;1354474;1354509;1354509;1354509;1355016;1355152;1355152;1355152;1355152;1355345;1355152;1355512;1355345;1355345;1355345;1355345;1355512;1355752;1355752…	-;-;-;-;-;-;-;-;-;-;-;-;-;-;-;-;-;-;-;-;-;-;-;-;-;-;-;-;-;-;-;-;-;-;-;-;-;-;-;-;-;-;-;-;-;-;-;-;-;-;-;-;-;-;-;-;-;-;-	3622	1232	284	430	635	953	931	1948	474	1017	1783	904	1034	524	1126	1510	1645	584	736	521	607	944	1357	383	638	516	2251	2527	1542	586	1356	1367	1469	2724	1438	900	814	592	1341	1289	722	928	602	913	1020
ENSG00000175756.13	chr1;chr1;chr1;chr1;chr1;chr1;chr1;chr1;chr1;chr1;chr1;chr1;chr1;chr1;chr1;chr1;chr1;chr1;chr1	1373730;1373730;1373732;1373737;1374000;1374000;1374000;1374000;1374244;1374438;1374705;1374705;1374705;1374705;1374705;1374997;1374997;1375075;1375154	1373902;1373902;1373902;1373902;1374445;1374445;1374445;1374445;1374790;1374590;1374790;1375159;1374790;1374790;1375157;1375144;1375173;1375169;1375495	-;-;-;-;-;-;-;-;-;-;-;-;-;-;-;-;-;-;-	1669	139	69	108	111	472	694	289	96	125	130	514	135	91	251	174	173	142	149	167	204	117	246	137	70	509	284	180	160	146	181	311	210	279	241	80	294	160	132	204	268	100	187	238	227
ENSG00000223663.2	chr1	1378666	1379032	+	367	0	0	1	0	0	2	0	5	0	0	9	1	0	0	0	0	0	0	10	0	1	0	11	0	0	3	4	0	0	0	0	0	11	0	0	0	10	0	0	0	0	13	0	0
ENSG00000221978.12	chr1;chr1;chr1;chr1;chr1;chr1;chr1;chr1;chr1;chr1;chr1;chr1;chr1;chr1;chr1;chr1;chr1;chr1;chr1;chr1;chr1;chr1;chr1;chr1;chr1;chr1;chr1;chr1;chr1;chr1;chr1;chr1;chr1;chr1;chr1;chr1;chr1;chr1;chr1;chr1;chr1;chr1;chr1;chr1;chr1;chr1;chr1;chr1;chr1;chr1;chr1;chr1;chr1;chr1;chr1;chr1;chr1;chr1;chr1;chr1;chr1;chr1;chr1;chr1;chr1;chr1;chr1;chr1;chr1;chr1;chr1;chr1;chr1;chr1;chr1;chr1;chr1;chr1;chr1;chr1…	1385711;1385711;1386482;1386495;1386499;1386502;1386503;1386708;1386713;1387122;1387232;1387543;1387777;1387777;1387777;1387777;1387777;1387777;1387777;1387777;1387777;1387777;1387777;1387777;1387954;1387954;1387954;1387954;1387954;1387954;1387954;1387954;1387954;1387954;1387954;1387954;1388023;1388492;1388492;1388492;1388626;1388626;1388626;1388626;1388626;1388816;1388950;1388950;1389346;1390230…	1387582;1387582;1387582;1387582;1387582;1387582;1387582;1387582;1387582;1387582;1387582;1387582;1387869;1387869;1387869;1387869;1387869;1387869;1387869;1387869;1387869;1387869;1387869;1387869;1388065;1388065;1388065;1388065;1388065;1388065;1388065;1388065;1388065;1388713;1388065;1388065;1388065;1388510;1388510;1388510;1388743;1388743;1388743;1388743;1388743;1388830;1389047;1389047;1389473;1390371…	-;-;-;-;-;-;-;-;-;-;-;-;-;-;-;-;-;-;-;-;-;-;-;-;-;-;-;-;-;-;-;-;-;-;-;-;-;-;-;-;-;-;-;-;-;-;-;-;-;-;-;-;-;-;-;-;-;-;-;-;-;-;-;-;-;-;-;-;-;-;-;-;-;-;-;-;-;-;-;-;-;-;-;-;-;-;-;-;-;-;-;-;-;-;-;-;-;-;-;-;-;-;-;-;-;-;-;-;-;-;-;-;-;-;-;-;-;-;-;-;-;-;-;-;-;-;-;-;-;-;-;-;-;-;-;-;-;-;-;-;-;-	6857	2846	851	816	2387	2275	2541	2841	865	4078	2282	2990	2403	608	3497	2569	1507	866	1840	1219	2229	1421	2625	474	655	3105	2352	2610	3083	1992	1884	2218	2354	3538	2977	1637	1945	1123	1684	1250	2497	1788	1708	2383	1285
ENSG00000224870.7	chr1;chr1;chr1;chr1;chr1;chr1;chr1;chr1;chr1;chr1;chr1;chr1;chr1;chr1;chr1;chr1;chr1;chr1;chr1;chr1	1399520;1399520;1399527;1399530;1399552;1399562;1399572;1399806;1399981;1400158;1400158;1400158;1400158;1400419;1400605;1400605;1400605;1400605;1400605;1401243	1399689;1400303;1399685;1400303;1399685;1399689;1399689;1402033;1400303;1400544;1400608;1400303;1400303;1400472;1402026;1402006;1402036;1402046;1402019;1402046	+;+;+;+;+;+;+;+;+;+;+;+;+;+;+;+;+;+;+;+	2527	224	29	45	106	119	286	154	130	170	118	335	143	129	201	278	186	191	169	89	136	203	153	138	50	192	121	196	146	169	167	132	113	102	111	112	104	110	148	74	135	107	170	168	111
ENSG00000242485.6	chr1;chr1;chr1;chr1;chr1;chr1;chr1;chr1;chr1;chr1;chr1;chr1;chr1;chr1;chr1;chr1;chr1;chr1;chr1	1401909;1401913;1401913;1402182;1405109;1405809;1405809;1405809;1405809;1406226;1406249;1406909;1406909;1406909;1406909;1407131;1407131;1407131;1407131	1402256;1402256;1402256;1402601;1405886;1407019;1405886;1405886;1405886;1406307;1406346;1407019;1407019;1406998;1407019;1407290;1407235;1407268;1407293	-;-;-;-;-;-;-;-;-;-;-;-;-;-;-;-;-;-;-	2767	231	39	125	142	321	558	362	130	346	304	414	212	93	389	354	284	115	292	173	287	167	255	100	53	602	294	267	214	241	198	335	256	252	370	277	293	160	242	188	483	147	229	239	250
ENSG00000264293.2	chr1	1405460	1405752	-	293	0	0	0	0	0	0	0	0	0	0	0	0	0	0	0	0	0	0	0	0	0	0	0	0	0	0	0	0	0	0	0	0	0	0	0	0	0	0	0	0	0	0	0	0
ENSG00000272455.1	chr1	1409096	1410618	+	1523	24	6	21	36	91	56	11	45	0	16	56	29	0	60	80	26	21	43	41	74	55	11	58	2	68	45	1	8	32	12	54	24	18	3	26	26	71	19	3	68	14	71	42	16
ENSG00000235098.8	chr1;chr1;chr1;chr1;chr1;chr1;chr1;chr1;chr1;chr1;chr1;chr1;chr1;chr1;chr1	1418420;1418420;1418422;1418880;1419138;1420052;1420052;1420797;1420797;1420797;1420797;1420816;1421133;1421133;1421133	1419549;1419549;1419549;1419549;1419549;1420592;1420592;1421091;1421260;1421005;1421005;1421005;1421444;1421444;1421769	-;-;-;-;-;-;-;-;-;-;-;-;-;-;-	2644	25	75	28	26	126	56	95	53	13	33	55	19	30	70	32	56	60	22	10	39	70	62	72	11	7	66	116	37	60	94	23	80	87	117	55	79	81	43	74	8	62	6	76	0
ENSG00000225905.1	chr1;chr1	1420245;1422469	1420564;1422691	+;+	543	0	0	0	0	5	0	1	5	0	0	10	0	0	0	1	5	9	0	0	0	14	0	31	0	0	2	14	0	13	0	1	0	20	0	2	0	12	2	0	0	2	0	0	0
ENSG00000205116.3	chr1;chr1	1426128;1427554	1426385;1427787	+;+	492	0	0	0	9	2	13	5	2	13	0	5	0	0	12	19	1	9	0	0	1	7	2	22	0	0	0	12	13	0	1	16	0	0	1	7	2	16	0	4	41	2	0	2	13
ENSG00000225285.1	chr1;chr1;chr1;chr1;chr1;chr1;chr1;chr1	1430539;1430550;1430550;1430664;1431805;1434178;1434178;1434188	1430662;1430954;1430662;1430954;1431843;1434520;1434488;1434573	-;-;-;-;-;-;-;-	851	54	3	36	5	9	14	7	43	27	2	44	7	7	101	98	9	44	9	1	7	56	11	105	19	4	3	13	13	39	19	22	3	8	1	35	30	50	13	10	117	5	16	3	19
ENSG00000179403.12	chr1;chr1;chr1;chr1;chr1;chr1;chr1;chr1;chr1;chr1	1434861;1435523;1435690;1435735;1436807;1436927;1436927;1437322;1439081;1439081	1435146;1435821;1435821;1435821;1437177;1437484;1437459;1437484;1442882;1440765	+;+;+;+;+;+;+;+;+;+	5065	638	451	370	245	977	1190	602	321	343	992	1449	997	286	1006	780	253	253	445	154	686	619	558	267	258	1008	668	489	314	505	335	528	278	815	629	350	1778	319	422	303	1278	893	553	445	533
ENSG00000215915.10	chr1;chr1;chr1;chr1;chr1;chr1;chr1;chr1;chr1;chr1;chr1;chr1;chr1;chr1;chr1;chr1;chr1;chr1;chr1;chr1	1449689;1449914;1450681;1452046;1452046;1452365;1452365;1454345;1455460;1455460;1455791;1455791;1456225;1457129;1459161;1460750;1462483;1462600;1468384;1468384	1450758;1450041;1450758;1452122;1452122;1452434;1452434;1454500;1455519;1455519;1455902;1455916;1456349;1457180;1459231;1460917;1462708;1462708;1468663;1470163	+;+;+;+;+;+;+;+;+;+;+;+;+;+;+;+;+;+;+;+	3981	25	68	101	120	162	154	44	89	40	31	38	344	48	111	67	137	90	124	41	17	170	73	173	49	393	54	72	50	23	80	87	49	95	61	19	789	89	52	22	177	84	88	83	44
ENSG00000160072.20	chr1;chr1;chr1;chr1;chr1;chr1;chr1;chr1;chr1;chr1;chr1;chr1;chr1;chr1;chr1;chr1;chr1;chr1;chr1;chr1;chr1;chr1;chr1;chr1;chr1;chr1;chr1;chr1;chr1;chr1;chr1;chr1;chr1;chr1;chr1;chr1;chr1;chr1;chr1;chr1;chr1;chr1;chr1;chr1;chr1;chr1;chr1;chr1;chr1;chr1;chr1;chr1;chr1;chr1;chr1;chr1;chr1;chr1;chr1;chr1;chr1;chr1;chr1	1471765;1471784;1477274;1477274;1478026;1478644;1479049;1479049;1479049;1480867;1480867;1480867;1480867;1482138;1482138;1482138;1482266;1482545;1482545;1482545;1482545;1483485;1484569;1485016;1485016;1485016;1485782;1485782;1485782;1485782;1485782;1486110;1486110;1486110;1486110;1486544;1486544;1486544;1486544;1486544;1487863;1487863;1487863;1487863;1489204;1489204;1489204;1489204;1489204;1489692…	1472089;1472089;1477350;1477350;1478745;1478745;1479108;1479108;1479108;1480936;1480936;1480908;1480936;1482303;1482303;1482303;1482303;1482662;1482614;1482614;1482614;1485171;1485171;1485171;1485171;1485171;1486235;1485838;1485838;1485838;1485838;1486235;1486235;1486235;1486235;1486668;1486668;1486668;1486668;1486668;1487914;1487914;1487914;1487914;1490671;1489274;1489274;1489274;1489274;1489811…	+;+;+;+;+;+;+;+;+;+;+;+;+;+;+;+;+;+;+;+;+;+;+;+;+;+;+;+;+;+;+;+;+;+;+;+;+;+;+;+;+;+;+;+;+;+;+;+;+;+;+;+;+;+;+;+;+;+;+;+;+;+;+	7686	93	90	147	294	315	669	348	263	306	448	441	385	148	448	495	330	212	314	296	355	256	345	342	137	1939	308	335	280	232	297	367	242	369	395	232	343	291	280	264	630	227	366	302	282
ENSG00000284740.1	chr1;chr1;chr1;chr1	1503250;1503582;1509205;1509205	1503661;1503661;1509452;1509351	+;+;+;+	660	0	0	0	0	0	1	1	3	0	0	0	0	0	2	3	0	1	0	0	9	18	0	10	1	2	8	2	7	0	0	4	0	2	5	0	18	11	6	0	0	2	1	0	0
ENSG00000197785.14	chr1;chr1;chr1;chr1;chr1;chr1;chr1;chr1;chr1;chr1;chr1;chr1;chr1;chr1;chr1;chr1;chr1;chr1;chr1;chr1;chr1;chr1;chr1;chr1;chr1;chr1;chr1;chr1;chr1;chr1;chr1;chr1;chr1;chr1;chr1;chr1;chr1;chr1;chr1;chr1;chr1;chr1;chr1;chr1;chr1;chr1;chr1;chr1;chr1;chr1;chr1;chr1;chr1;chr1;chr1;chr1;chr1;chr1;chr1;chr1;chr1;chr1;chr1;chr1;chr1;chr1;chr1;chr1;chr1;chr1;chr1;chr1;chr1;chr1;chr1;chr1;chr1;chr1;chr1;chr1…	1512162;1512165;1512175;1512385;1512530;1516012;1516012;1516012;1516012;1516012;1517070;1517167;1517311;1517311;1517311;1517311;1517621;1517716;1517716;1517716;1517716;1517716;1518921;1518921;1518921;1518921;1518921;1518921;1519492;1520141;1520141;1520141;1520141;1520141;1520141;1520548;1520548;1520548;1520548;1520548;1522744;1522744;1522744;1522744;1522744;1522744;1523511;1523511;1523511;1523511…	1512473;1512473;1512473;1512473;1512690;1516088;1516088;1516088;1516088;1516088;1517412;1517412;1517412;1517412;1517775;1517412;1517775;1517775;1517775;1517775;1517775;1517775;1518990;1518990;1518990;1518990;1518990;1518990;1519571;1520306;1520306;1520306;1520306;1520306;1520306;1520617;1520617;1520617;1520617;1520617;1522780;1522899;1522899;1522899;1522899;1522899;1523567;1523567;1523567;1523567…	+;+;+;+;+;+;+;+;+;+;+;+;+;+;+;+;+;+;+;+;+;+;+;+;+;+;+;+;+;+;+;+;+;+;+;+;+;+;+;+;+;+;+;+;+;+;+;+;+;+;+;+;+;+;+;+;+;+;+;+;+;+;+;+;+;+;+;+;+;+;+;+;+;+;+;+;+;+;+;+;+;+;+;+;+;+;+;+;+;+;+;+;+;+	3344	97	50	82	87	174	404	123	139	105	74	284	159	26	207	80	186	61	69	85	231	173	186	229	96	468	189	209	67	106	104	215	108	197	182	79	148	148	145	74	175	59	180	147	124
ENSG00000205090.9	chr1;chr1;chr1;chr1;chr1;chr1;chr1;chr1;chr1;chr1;chr1	1534778;1535207;1535589;1535589;1539056;1539684;1539684;1540290;1540290;1540290;1540420	1535507;1535507;1535797;1535797;1539790;1539790;1539790;1540350;1540355;1540624;1540453	-;-;-;-;-;-;-;-;-;-;-	2009	21	1	4	3	9	8	12	29	13	29	33	9	4	8	9	60	17	17	22	35	20	2	51	13	35	13	34	16	2	25	4	23	68	36	12	36	42	19	35	4	14	8	0	9
ENSG00000160075.12	chr1;chr1;chr1;chr1;chr1;chr1;chr1;chr1;chr1;chr1;chr1;chr1;chr1	1541673;1541674;1543869;1543869;1544638;1544863;1544863;1560848;1564773;1564773;1574478;1574478;1574478	1542167;1542167;1543987;1543987;1545002;1546487;1545002;1564916;1564916;1564916;1574587;1574584;1574863	-;-;-;-;-;-;-;-;-;-;-;-;-	6919	897	367	407	710	1124	1656	945	514	822	524	1200	809	160	1430	1051	771	416	732	518	790	659	621	506	257	2686	630	843	976	782	877	808	782	961	763	536	840	451	554	605	1153	651	826	1078	623
ENSG00000215014.5	chr1;chr1;chr1	1574102;1574975;1575287	1574349;1577075;1575879	+;+;+	2349	17	0	0	5	17	44	27	58	7	8	28	7	19	19	9	76	60	20	0	0	65	22	148	2	49	2	28	33	40	1	2	0	2	4	35	1	88	7	16	1	55	28	30	22
ENSG00000274481.1	chr1	1583510	1583909	-	400	0	0	0	0	0	0	0	1	0	0	0	0	0	0	0	11	3	0	0	0	30	0	32	0	0	0	3	0	0	0	0	0	0	0	0	0	16	0	0	0	0	0	0	0
ENSG00000228594.4	chr1	1598012	1600135	-	2124	52	33	29	5	136	54	35	35	10	23	83	20	10	28	13	45	33	25	29	107	54	49	76	17	4	57	92	8	7	39	110	24	45	24	10	40	61	21	19	10	21	55	46	11
ENSG00000286989.1	chr1;chr1;chr1	1600314;1600657;1601193	1600582;1600706;1602703	+;+;+	1830	19	0	2	0	16	3	8	41	13	25	29	11	5	4	38	9	15	20	1	15	40	38	113	0	0	13	19	22	13	5	22	5	13	1	17	11	56	10	12	8	9	37	33	12
ENSG00000272106.1	chr1	1613758	1615795	-	2038	36	8	10	20	40	35	85	111	72	4	107	43	11	109	108	84	101	9	17	21	118	68	101	7	57	58	28	52	56	24	57	49	59	30	67	47	76	35	43	81	52	37	18	57
ENSG00000197530.12	chr1;chr1;chr1;chr1;chr1;chr1;chr1;chr1;chr1;chr1;chr1;chr1;chr1;chr1;chr1;chr1;chr1;chr1;chr1;chr1;chr1;chr1;chr1;chr1;chr1;chr1;chr1;chr1;chr1;chr1;chr1;chr1;chr1;chr1;chr1;chr1;chr1;chr1;chr1;chr1;chr1;chr1;chr1;chr1;chr1;chr1;chr1;chr1;chr1;chr1;chr1;chr1;chr1;chr1;chr1;chr1;chr1;chr1;chr1;chr1;chr1;chr1;chr1;chr1;chr1;chr1;chr1;chr1;chr1;chr1;chr1;chr1;chr1;chr1;chr1;chr1;chr1;chr1;chr1;chr1…	1615415;1615421;1615437;1615443;1615454;1615496;1615514;1615516;1615530;1615879;1615887;1615905;1615914;1615968;1616274;1616310;1616311;1616508;1616508;1616508;1616508;1616508;1616508;1616508;1616508;1616508;1616508;1616508;1616508;1616508;1616508;1617078;1617408;1617560;1617577;1623122;1623389;1623389;1623389;1623389;1623389;1623389;1623389;1623389;1623431;1623431;1623431;1623431;1623431;1623431…	1615633;1615633;1615633;1615633;1615633;1615633;1615633;1615633;1615633;1616100;1616100;1616100;1616100;1616100;1616614;1616614;1616614;1616614;1617898;1616614;1616614;1616614;1619210;1616614;1616614;1616614;1616614;1616614;1616614;1616614;1616614;1617323;1617515;1617715;1617715;1623482;1623699;1623699;1623699;1623699;1623482;1623699;1623699;1623699;1623699;1623699;1623699;1623699;1623679;1623699…	+;+;+;+;+;+;+;+;+;+;+;+;+;+;+;+;+;+;+;+;+;+;+;+;+;+;+;+;+;+;+;+;+;+;+;+;+;+;+;+;+;+;+;+;+;+;+;+;+;+;+;+;+;+;+;+;+;+;+;+;+;+;+;+;+;+;+;+;+;+;+;+;+;+;+;+;+;+;+;+;+;+;+;+;+;+;+;+;+;+;+;+;+;+;+;+;+;+;+;+;+;+;+;+;+;+;+;+;+;+;+;+;+;+;+;+;+;+;+;+;+;+;+;+;+;+;+;+;+;+;+;+;+;+;+;+;+;+;+;+;+;+;+;+;+;+;+;+;+;+;+;+;+;+;+;+;+;+;+;+;+;+;+;+;+;+;+;+;+;+;+;+;+;+;+;+;+;+;+;+;+;+;+;+;+;+;+;+;+;+;+;+;+;+;+;+;+;+;+;+…	8767	702	169	145	468	465	908	1118	464	739	1186	908	612	377	1155	459	1332	226	505	448	653	726	693	558	202	693	688	1258	989	470	624	539	1190	788	951	397	511	502	687	993	520	399	631	879	504
ENSG00000189409.14	chr1;chr1;chr1;chr1;chr1;chr1;chr1;chr1;chr1;chr1;chr1;chr1;chr1;chr1;chr1;chr1;chr1;chr1;chr1;chr1;chr1;chr1;chr1;chr1;chr1;chr1;chr1;chr1;chr1;chr1;chr1;chr1;chr1;chr1;chr1;chr1;chr1;chr1;chr1;chr1;chr1;chr1;chr1;chr1;chr1;chr1;chr1;chr1	1632163;1632173;1632178;1632179;1632710;1632783;1632783;1632783;1632783;1632981;1632981;1632981;1632981;1633188;1633188;1633188;1633203;1633203;1633679;1633748;1633748;1633748;1633748;1633748;1633989;1633989;1633989;1633989;1633989;1634002;1634202;1634202;1634202;1634202;1634202;1634202;1634202;1634240;1634451;1634451;1634451;1634451;1634451;1634451;1634451;1634451;1634451;1635159	1632374;1632374;1632374;1632374;1632913;1632913;1632913;1632913;1632913;1633355;1633120;1633120;1633120;1633355;1634099;1633355;1633355;1633480;1633912;1634099;1633912;1633912;1633912;1633912;1634099;1634099;1634099;1634099;1634099;1634328;1634328;1634328;1634328;1634328;1634328;1634328;1634328;1634328;1634786;1634568;1634608;1634604;1634568;1634654;1634651;1634474;1634654;1635263	+;+;+;+;+;+;+;+;+;+;+;+;+;+;+;+;+;+;+;+;+;+;+;+;+;+;+;+;+;+;+;+;+;+;+;+;+;+;+;+;+;+;+;+;+;+;+;+	2205	6	1	1	8	2	0	44	4	1	28	0	0	22	0	3	17	1	0	0	3	30	3	14	5	0	8	25	16	1	27	11	15	12	4	0	8	6	10	20	11	15	0	23	7
ENSG00000248333.9	chr1;chr1;chr1;chr1;chr1;chr1;chr1;chr1;chr1;chr1;chr1;chr1;chr1;chr1;chr1;chr1;chr1;chr1;chr1;chr1;chr1;chr1;chr1;chr1;chr1;chr1;chr1;chr1;chr1;chr1;chr1;chr1;chr1;chr1;chr1;chr1;chr1;chr1;chr1;chr1;chr1;chr1;chr1;chr1;chr1;chr1;chr1;chr1;chr1;chr1;chr1;chr1;chr1;chr1;chr1;chr1;chr1;chr1;chr1;chr1;chr1;chr1;chr1;chr1;chr1;chr1;chr1;chr1;chr1;chr1;chr1;chr1;chr1;chr1;chr1;chr1;chr1;chr1;chr1;chr1…	1635225;1635587;1635738;1635738;1635738;1635738;1635738;1635738;1635937;1635937;1635937;1635937;1635937;1635937;1635937;1635937;1636333;1636333;1636333;1636333;1636333;1636333;1636333;1636333;1636682;1636682;1636682;1636682;1636682;1636682;1636682;1636682;1636897;1636897;1636897;1636897;1636897;1636897;1636897;1636897;1637081;1637081;1637081;1637081;1637081;1637081;1637081;1637081;1637408;1637408…	1635856;1635856;1635856;1635856;1635856;1635856;1635856;1635856;1636126;1636126;1636126;1636126;1636126;1636126;1636126;1636126;1636481;1636481;1636481;1636481;1636481;1636481;1636481;1636481;1636798;1636798;1636798;1636798;1636798;1636798;1636798;1636798;1637004;1637004;1637004;1637004;1637004;1637004;1637004;1637004;1637202;1637202;1637202;1637202;1637202;1637202;1637202;1637202;1637513;1637513…	-;-;-;-;-;-;-;-;-;-;-;-;-;-;-;-;-;-;-;-;-;-;-;-;-;-;-;-;-;-;-;-;-;-;-;-;-;-;-;-;-;-;-;-;-;-;-;-;-;-;-;-;-;-;-;-;-;-;-;-;-;-;-;-;-;-;-;-;-;-;-;-;-;-;-;-;-;-;-;-;-;-;-;-;-;-;-;-;-;-;-;-;-;-;-;-;-;-;-;-;-;-;-;-;-;-;-;-;-;-;-;-;-;-;-;-;-;-;-;-;-;-;-;-;-;-;-;-;-;-;-;-;-;-;-;-;-;-;-;-;-;-;-;-;-;-;-;-;-;-;-;-;-;-;-;-;-;-;-;-;-;-;-;-;-;-;-;-;-;-;-;-	3490	414	121	317	284	511	765	614	179	524	285	558	573	78	652	418	281	142	426	345	625	307	555	199	176	1281	575	553	524	281	440	523	529	529	376	319	348	203	208	285	602	258	448	429	376
ENSG00000272004.1	chr1;chr1	1659325;1662331	1659452;1662602	+;+	400	5	0	5	0	0	0	0	1	0	0	0	0	0	0	19	8	0	0	0	0	10	0	10	0	0	10	1	0	0	0	0	0	41	0	0	0	1	1	0	0	0	0	0	17
ENSG00000189339.12	chr1;chr1;chr1;chr1;chr1;chr1;chr1;chr1;chr1;chr1;chr1;chr1;chr1;chr1;chr1;chr1;chr1;chr1;chr1;chr1;chr1;chr1;chr1;chr1;chr1;chr1;chr1;chr1;chr1;chr1;chr1;chr1;chr1;chr1	1659529;1661478;1661479;1663782;1668327;1668327;1668327;1668327;1669664;1669664;1669664;1670098;1670098;1670425;1671509;1671509;1675463;1675463;1675463;1675463;1676064;1676064;1676064;1676064;1676378;1676378;1676378;1676378;1690976;1690976;1692449;1692449;1692449;1692449	1660111;1666019;1666019;1666019;1668472;1668472;1668472;1668472;1670139;1669736;1669736;1670151;1670151;1671629;1671629;1671629;1675590;1675590;1675590;1675590;1676199;1676199;1676199;1676199;1676846;1676846;1676846;1676846;1691393;1691393;1692709;1692728;1692795;1692724	-;-;-;-;-;-;-;-;-;-;-;-;-;-;-;-;-;-;-;-;-;-;-;-;-;-;-;-;-;-;-;-;-;-	8462	644	141	322	267	1215	1026	1126	321	670	608	1967	339	284	1273	756	450	327	506	600	755	477	723	269	151	812	771	698	510	677	547	975	476	802	955	610	587	465	376	651	1029	522	505	1132	518
ENSG00000269737.2	chr1;chr1;chr1	1671990;1673275;1674001	1673411;1673379;1674397	+;+;+	1819	85	18	24	51	82	111	93	75	170	42	141	44	16	96	106	103	31	192	91	89	113	94	97	38	99	103	112	136	70	67	200	99	59	156	73	53	66	49	135	93	52	73	152	79
ENSG00000215914.4	chr1;chr1;chr1;chr1;chr1;chr1;chr1	1699942;1700140;1700347;1700907;1701148;1701361;1701608	1700072;1700279;1700514;1701071;1701258;1701487;1701782	+;+;+;+;+;+;+	1017	4	0	0	0	1	1	19	0	0	67	0	2	12	0	9	2	0	0	0	0	0	0	1	1	0	1	0	0	4	4	0	1	0	1	0	2	4	2	14	0	0	0	0	0
ENSG00000008128.23	chr1;chr1;chr1;chr1;chr1;chr1;chr1;chr1;chr1;chr1;chr1;chr1;chr1;chr1;chr1;chr1;chr1;chr1;chr1;chr1;chr1;chr1;chr1;chr1;chr1;chr1;chr1;chr1;chr1;chr1;chr1;chr1;chr1;chr1;chr1;chr1;chr1;chr1;chr1;chr1;chr1;chr1;chr1;chr1;chr1;chr1;chr1;chr1;chr1;chr1;chr1;chr1;chr1;chr1;chr1;chr1;chr1;chr1;chr1;chr1;chr1;chr1;chr1;chr1;chr1;chr1;chr1;chr1;chr1;chr1;chr1;chr1;chr1;chr1;chr1;chr1;chr1;chr1;chr1;chr1…	1702379;1702730;1702766;1702881;1702881;1702881;1702881;1702881;1702881;1702881;1703080;1703080;1703080;1703080;1703080;1703080;1703080;1703080;1703080;1703080;1703088;1703088;1703476;1703476;1703476;1703476;1703476;1703476;1703476;1703476;1703476;1703476;1703476;1703604;1703824;1703824;1703824;1703824;1703824;1703824;1703824;1703824;1703824;1703824;1703824;1703868;1704039;1704039;1704039;1704039…	1702999;1702999;1702999;1702999;1702999;1702999;1702999;1702999;1702999;1702999;1703269;1703269;1703269;1703269;1703269;1703269;1703269;1703269;1703269;1703269;1703940;1703269;1703624;1703624;1703624;1703624;1703624;1703624;1703624;1703624;1703940;1703624;1703624;1703624;1703995;1703940;1703940;1703940;1703940;1703940;1703940;1703940;1703940;1703940;1703940;1703995;1704146;1704146;1704116;1704146…	-;-;-;-;-;-;-;-;-;-;-;-;-;-;-;-;-;-;-;-;-;-;-;-;-;-;-;-;-;-;-;-;-;-;-;-;-;-;-;-;-;-;-;-;-;-;-;-;-;-;-;-;-;-;-;-;-;-;-;-;-;-;-;-;-;-;-;-;-;-;-;-;-;-;-;-;-;-;-;-;-;-;-;-;-;-;-;-;-;-;-;-;-;-;-;-;-;-;-;-;-;-;-;-;-;-;-;-;-;-;-;-;-;-;-;-;-;-;-;-;-;-;-;-;-;-;-;-;-;-;-;-;-;-;-;-;-;-;-;-;-;-;-;-;-;-;-;-;-;-;-;-;-;-;-;-;-;-;-;-;-;-;-;-;-;-;-;-;-;-;-;-;-;-;-;-;-;-;-;-;-;-;-;-;-;-;-;-;-;-;-;-;-;-;-;-;-;-;-;-…	5085	43	3	13	75	12	60	36	43	56	20	65	32	8	41	60	2	9	18	93	34	16	64	59	9	50	50	86	56	67	81	15	28	73	27	10	16	42	34	67	58	9	14	65	79
ENSG00000268575.1	chr1;chr1;chr1;chr1;chr1;chr1;chr1;chr1;chr1;chr1;chr1;chr1;chr1;chr1;chr1;chr1;chr1;chr1;chr1;chr1	1702736;1703080;1703476;1703824;1704223;1704550;1704904;1705642;1707525;1708180;1708794;1709038;1709518;1712264;1716346;1719358;1721596;1722588;1734690;1735204	1702999;1703269;1703624;1703995;1704344;1704655;1705025;1705732;1707584;1708245;1708952;1709133;1709640;1712400;1716478;1719455;1721711;1722831;1734835;1737688	-;-;-;-;-;-;-;-;-;-;-;-;-;-;-;-;-;-;-;-	5079	131	14	11	42	25	107	141	33	173	29	109	28	33	171	35	34	40	28	32	63	50	102	32	8	43	63	57	49	76	64	118	71	75	81	37	84	49	37	56	106	39	82	66	104
ENSG00000227775.3	chr1;chr1;chr1;chr1;chr1;chr1;chr1;chr1	1724512;1724615;1730246;1732554;1735817;1735817;1735817;1736854	1724763;1724763;1731904;1732844;1735975;1735915;1735973;1737251	+;+;+;+;+;+;+;+	2759	104	19	50	135	86	72	105	97	155	18	157	148	25	220	109	101	63	61	49	119	75	89	169	26	123	74	96	166	156	206	74	54	107	141	118	66	197	110	101	58	28	105	115	294
ENSG00000215790.8	chr1;chr1;chr1;chr1;chr1;chr1;chr1;chr1;chr1;chr1;chr1;chr1;chr1;chr1;chr1;chr1;chr1;chr1;chr1;chr1	1724838;1731828;1732242;1734690;1734690;1734690;1734690;1735204;1738321;1738321;1738321;1738922;1738922;1738922;1739236;1739236;1739236;1744251;1745724;1745724	1725422;1732523;1732523;1734835;1734835;1734835;1734835;1735620;1738448;1738448;1738448;1739057;1739057;1739057;1739704;1739557;1739704;1744668;1745992;1745919	-;-;-;-;-;-;-;-;-;-;-;-;-;-;-;-;-;-;-;-	3264	83	40	7	24	52	101	63	63	8	25	137	33	57	93	106	36	14	22	13	69	61	49	47	6	68	74	35	77	60	21	122	76	158	105	42	46	59	48	53	71	38	3	135	133
ENSG00000008130.15	chr1;chr1;chr1;chr1;chr1;chr1;chr1;chr1;chr1;chr1;chr1;chr1;chr1;chr1;chr1;chr1;chr1;chr1;chr1;chr1;chr1;chr1;chr1;chr1;chr1;chr1;chr1;chr1;chr1;chr1;chr1;chr1;chr1;chr1;chr1;chr1;chr1;chr1;chr1;chr1;chr1;chr1;chr1;chr1;chr1;chr1;chr1;chr1;chr1;chr1;chr1;chr1;chr1;chr1;chr1;chr1;chr1;chr1;chr1;chr1;chr1;chr1;chr1;chr1;chr1;chr1;chr1;chr1;chr1;chr1;chr1;chr1;chr1;chr1;chr1;chr1;chr1;chr1;chr1;chr1…	1751232;1751232;1751232;1752471;1752975;1753567;1753567;1753567;1753567;1753567;1754051;1754051;1754051;1754051;1754061;1754163;1754165;1754171;1754181;1754203;1754284;1754284;1754284;1754284;1754284;1754284;1754284;1754284;1754284;1754343;1754544;1754544;1754544;1754544;1754544;1754544;1754544;1754544;1754544;1754544;1754544;1755374;1755374;1755374;1755374;1755374;1755374;1755374;1755374;1756004…	1753060;1753060;1753060;1753060;1753060;1753649;1753649;1753649;1753649;1753649;1754208;1754208;1754208;1754208;1754208;1754383;1754208;1754208;1754208;1754383;1754383;1754383;1754383;1754383;1754383;1754383;1754383;1754383;1754383;1754383;1754698;1754698;1754896;1754698;1754866;1754698;1754698;1754698;1754698;1754698;1754698;1755476;1755476;1755476;1755476;1755476;1755476;1755476;1755476;1756343…	-;-;-;-;-;-;-;-;-;-;-;-;-;-;-;-;-;-;-;-;-;-;-;-;-;-;-;-;-;-;-;-;-;-;-;-;-;-;-;-;-;-;-;-;-;-;-;-;-;-;-;-;-;-;-;-;-;-;-;-;-;-;-;-;-;-;-;-;-;-;-;-;-;-;-;-;-;-;-;-;-;-;-;-;-;-;-;-;-;-;-;-;-;-;-;-;-;-;-;-;-;-;-;-;-;-;-	5570	512	230	259	325	974	861	633	351	641	386	1160	613	271	603	659	443	292	666	450	858	607	559	354	239	709	605	438	403	452	711	737	572	622	565	304	653	404	426	455	868	615	655	622	597
ENSG00000078369.18	chr1;chr1;chr1;chr1;chr1;chr1;chr1;chr1;chr1;chr1;chr1;chr1;chr1;chr1;chr1;chr1;chr1;chr1;chr1;chr1;chr1;chr1;chr1;chr1;chr1;chr1;chr1;chr1;chr1;chr1;chr1;chr1;chr1;chr1;chr1;chr1;chr1;chr1;chr1;chr1;chr1;chr1;chr1;chr1;chr1;chr1;chr1;chr1;chr1;chr1;chr1;chr1;chr1;chr1;chr1;chr1;chr1;chr1;chr1;chr1;chr1;chr1;chr1;chr1;chr1;chr1;chr1;chr1;chr1;chr1	1785285;1785285;1785286;1787322;1787322;1787322;1787987;1789053;1789053;1789053;1789061;1790395;1790395;1790395;1790395;1790395;1790565;1793245;1793245;1793245;1793245;1793245;1793245;1793245;1804419;1804419;1804419;1804419;1804419;1804419;1804526;1806475;1806475;1806475;1806475;1806475;1806475;1806475;1815756;1815756;1815756;1815756;1815756;1815756;1817687;1817837;1817837;1817837;1817837;1824988…	1787053;1787053;1787053;1787437;1787437;1787437;1789269;1789269;1789269;1789269;1789269;1790596;1790596;1790596;1790596;1790596;1790596;1793311;1793311;1793311;1793311;1794197;1793311;1793311;1804581;1804581;1804581;1804581;1804581;1804581;1804581;1806538;1806538;1806538;1806538;1806538;1806538;1806538;1815862;1815862;1815862;1815862;1815862;1815862;1818386;1817875;1817875;1817875;1817875;1825499…	-;-;-;-;-;-;-;-;-;-;-;-;-;-;-;-;-;-;-;-;-;-;-;-;-;-;-;-;-;-;-;-;-;-;-;-;-;-;-;-;-;-;-;-;-;-;-;-;-;-;-;-;-;-;-;-;-;-;-;-;-;-;-;-;-;-;-;-;-;-	6417	2511	1534	1412	1749	5426	5881	4071	1152	2787	1751	6619	3351	729	4859	4149	1990	848	2566	1438	3202	1759	3388	638	1158	5869	2867	2740	3214	2575	2743	2751	3040	4577	2720	1550	2623	1025	2089	1836	5388	2889	2807	2936	2718
ENSG00000231050.1	chr1;chr1	1891471;1892134	1891851;1892658	+;+	906	8	12	0	12	2	15	20	60	10	22	57	6	1	6	46	58	19	6	4	8	29	18	70	0	6	2	3	13	34	20	18	11	13	12	8	10	31	16	25	12	2	7	19	2
ENSG00000169885.10	chr1;chr1;chr1;chr1;chr1;chr1;chr1;chr1;chr1;chr1;chr1;chr1;chr1;chr1;chr1;chr1;chr1	1915108;1915260;1915266;1915409;1915685;1916441;1916441;1916752;1916752;1916752;1916974;1916974;1916974;1916974;1917147;1917147;1917147	1915307;1915307;1916896;1915735;1915735;1916615;1916615;1916896;1916896;1916896;1917071;1917074;1917074;1917074;1917296;1917294;1917296	+;+;+;+;+;+;+;+;+;+;+;+;+;+;+;+;+	2040	13	0	4	8	10	10	10	71	60	2	11	3	7	11	14	9	36	0	45	14	76	3	97	4	1	8	15	23	23	5	30	3	0	2	10	29	53	28	108	55	2	19	9	10
ENSG00000178821.13	chr1;chr1;chr1;chr1;chr1;chr1;chr1;chr1;chr1;chr1;chr1;chr1;chr1;chr1;chr1;chr1;chr1;chr1;chr1;chr1;chr1	1917590;1917591;1917845;1917937;1918099;1918253;1918253;1918253;1918253;1918386;1918893;1918893;1918893;1918893;1919045;1919045;1919045;1919045;1919182;1919182;1919182	1918162;1918162;1918071;1918162;1918162;1918934;1918431;1918431;1918797;1918431;1918934;1918934;1918934;1919088;1919088;1919269;1919258;1919088;1919269;1919270;1919279	-;-;-;-;-;-;-;-;-;-;-;-;-;-;-;-;-;-;-;-;-	1600	1	8	2	3	2	8	7	32	0	3	0	16	0	0	1	1	16	0	0	3	71	14	104	5	3	0	2	1	2	0	20	5	0	2	0	1	69	10	59	5	0	6	0	5
ENSG00000142609.18	chr1;chr1;chr1;chr1;chr1;chr1;chr1;chr1;chr1;chr1;chr1;chr1;chr1;chr1;chr1;chr1;chr1;chr1;chr1;chr1;chr1;chr1;chr1;chr1;chr1;chr1;chr1;chr1;chr1;chr1;chr1;chr1;chr1;chr1;chr1;chr1;chr1;chr1;chr1;chr1;chr1;chr1;chr1;chr1;chr1;chr1;chr1;chr1;chr1;chr1;chr1;chr1;chr1;chr1;chr1;chr1;chr1;chr1;chr1;chr1;chr1;chr1;chr1;chr1;chr1;chr1;chr1;chr1;chr1;chr1;chr1;chr1;chr1;chr1;chr1;chr1;chr1;chr1;chr1;chr1…	1921951;1921951;1921957;1922083;1922589;1922589;1922589;1922985;1922985;1922985;1922985;1923367;1923367;1923367;1923367;1923775;1923775;1923775;1923775;1924391;1924391;1924391;1924391;1925783;1925783;1925783;1925783;1926228;1926228;1926228;1926228;1926457;1926457;1926457;1926457;1926652;1926652;1926652;1926652;1926894;1926894;1926894;1927607;1927607;1928784;1928784;1930060;1930060;1938855;1938855…	1922388;1922388;1922388;1922388;1922723;1922723;1922723;1923145;1923145;1923115;1923115;1923499;1923499;1923499;1923499;1923929;1923929;1923929;1923929;1924520;1924520;1924520;1924520;1925938;1925938;1925938;1925938;1926347;1926347;1926347;1926347;1926512;1926512;1926512;1926512;1926761;1927929;1926761;1926761;1927403;1927028;1927028;1927746;1927746;1928882;1928882;1930336;1930336;1938988;1938988…	-;-;-;-;-;-;-;-;-;-;-;-;-;-;-;-;-;-;-;-;-;-;-;-;-;-;-;-;-;-;-;-;-;-;-;-;-;-;-;-;-;-;-;-;-;-;-;-;-;-;-;-;-;-;-;-;-;-;-;-;-;-;-;-;-;-;-;-;-;-;-;-;-;-;-;-;-;-;-;-;-;-;-;-;-;-;-;-;-;-;-;-;-;-;-;-;-;-;-;-;-;-;-;-;-;-;-;-;-;-;-;-;-;-;-;-;-;-;-;-;-;-;-;-;-;-;-;-;-;-;-;-;-;-;-;-;-;-;-;-;-	10422	19	15	5	4	0	11	5	397	10	15	4	5	0	16	30	186	168	7	0	58	394	11	662	36	5	22	51	4	50	9	14	2	5	28	48	14	600	2	21	46	2	1	167	9
ENSG00000233542.2	chr1;chr1;chr1;chr1;chr1	2013213;2013569;2014486;2015365;2015365	2015000;2013755;2015000;2015530;2015639	-;-;-;-;-	2063	1	13	0	0	0	2	7	47	0	0	0	4	0	0	20	8	26	2	10	0	46	4	58	12	0	0	2	0	7	7	0	5	0	43	4	5	39	0	6	0	0	0	3	4
ENSG00000187730.9	chr1;chr1;chr1;chr1;chr1;chr1;chr1;chr1;chr1;chr1;chr1;chr1;chr1;chr1;chr1;chr1;chr1;chr1;chr1;chr1;chr1;chr1;chr1;chr1;chr1;chr1;chr1;chr1;chr1;chr1;chr1;chr1;chr1;chr1;chr1;chr1;chr1;chr1;chr1;chr1;chr1;chr1;chr1;chr1;chr1;chr1;chr1;chr1;chr1;chr1;chr1;chr1;chr1;chr1;chr1;chr1;chr1;chr1;chr1;chr1;chr1;chr1;chr1;chr1;chr1;chr1;chr1;chr1;chr1;chr1;chr1;chr1;chr1;chr1;chr1;chr1;chr1;chr1;chr1;chr1…	2019329;2019345;2019360;2019360;2019360;2019379;2019387;2019404;2019484;2022315;2023561;2023797;2024270;2024942;2024942;2024942;2024942;2024942;2024942;2024942;2024942;2024942;2024942;2025334;2025334;2025334;2025334;2025334;2025334;2025334;2025334;2025334;2025334;2025334;2025346;2025518;2025518;2025518;2025518;2025518;2025518;2025518;2025518;2025518;2025518;2025518;2025518;2025526;2026528;2026895…	2019491;2019491;2019491;2019491;2019491;2019491;2019491;2019491;2019491;2022391;2024223;2023890;2025054;2025054;2025054;2025054;2025054;2025054;2025054;2025054;2025054;2025054;2025054;2025401;2025401;2025401;2025401;2025401;2025401;2025401;2025401;2025401;2025401;2025432;2025401;2025738;2025738;2025738;2025738;2025792;2025738;2025738;2025738;2025738;2025738;2025738;2025738;2025738;2027659;2028292…	+;+;+;+;+;+;+;+;+;+;+;+;+;+;+;+;+;+;+;+;+;+;+;+;+;+;+;+;+;+;+;+;+;+;+;+;+;+;+;+;+;+;+;+;+;+;+;+;+;+;+;+;+;+;+;+;+;+;+;+;+;+;+;+;+;+;+;+;+;+;+;+;+;+;+;+;+;+;+;+;+;+;+;+;+;+;+;+;+;+;+;+;+;+;+;+;+;+;+;+;+;+;+;+;+;+;+;+;+;+;+;+;+;+;+;+;+;+;+;+;+;+;+	5525	4	32	17	5	36	7	16	108	7	5	8	58	1	27	38	136	65	8	21	58	163	20	262	21	20	37	30	4	35	27	20	12	10	25	7	46	207	10	20	17	29	33	5	4
ENSG00000226969.1	chr1;chr1;chr1;chr1;chr1	2049203;2049304;2049598;2049598;2049868	2049468;2049468;2049651;2049666;2050070	-;-;-;-;-	538	0	0	0	0	0	0	0	9	0	0	0	0	0	0	0	13	26	0	0	0	14	0	24	0	5	0	2	0	3	0	13	8	0	0	0	0	9	0	0	0	0	3	6	0
ENSG00000067606.17	chr1;chr1;chr1;chr1;chr1;chr1;chr1;chr1;chr1;chr1;chr1;chr1;chr1;chr1;chr1;chr1;chr1;chr1;chr1;chr1;chr1;chr1;chr1;chr1;chr1;chr1;chr1;chr1;chr1;chr1;chr1;chr1;chr1;chr1;chr1;chr1;chr1;chr1;chr1;chr1;chr1;chr1;chr1;chr1;chr1;chr1;chr1;chr1;chr1;chr1;chr1;chr1;chr1;chr1;chr1;chr1;chr1;chr1;chr1;chr1;chr1;chr1;chr1;chr1;chr1;chr1;chr1;chr1;chr1;chr1;chr1;chr1;chr1;chr1;chr1;chr1;chr1;chr1;chr1;chr1…	2050411;2050485;2050503;2050808;2055441;2055441;2055441;2055441;2055441;2055679;2056484;2056484;2056484;2056484;2059541;2059541;2059541;2059541;2059541;2071299;2073462;2073719;2073986;2074688;2074855;2075244;2082248;2098347;2104716;2104739;2111654;2116205;2133638;2134813;2134990;2135262;2135262;2135262;2135262;2135262;2135262;2135262;2135262;2135262;2135262;2135262;2135262;2135262;2135262;2135262…	2050701;2050701;2050701;2051012;2055760;2055562;2055562;2055562;2055562;2055876;2056573;2056573;2056573;2056573;2059591;2059591;2059591;2059591;2059591;2071536;2073929;2073929;2074275;2074767;2075133;2075379;2082460;2098555;2104895;2104895;2111817;2116310;2134000;2135086;2135086;2135347;2135347;2135347;2135347;2135347;2135347;2135347;2135347;2135347;2135347;2135347;2135347;2135347;2135347;2135347…	+;+;+;+;+;+;+;+;+;+;+;+;+;+;+;+;+;+;+;+;+;+;+;+;+;+;+;+;+;+;+;+;+;+;+;+;+;+;+;+;+;+;+;+;+;+;+;+;+;+;+;+;+;+;+;+;+;+;+;+;+;+;+;+;+;+;+;+;+;+;+;+;+;+;+;+;+;+;+;+;+;+;+;+;+;+;+;+;+;+;+;+;+;+;+;+;+;+;+;+;+;+;+;+;+;+;+;+;+;+;+;+;+;+;+;+;+;+;+;+;+;+;+;+;+;+;+;+;+;+;+;+;+;+;+;+;+;+;+;+;+;+;+;+;+;+;+;+;+;+;+;+;+;+;+;+;+;+;+;+;+;+;+;+;+;+;+;+;+;+;+;+;+;+;+;+;+;+;+;+;+;+;+;+;+;+;+;+;+	7695	227	46	93	185	178	540	217	437	195	112	107	254	133	281	361	280	190	161	193	270	548	303	667	128	307	228	375	179	208	195	281	154	294	222	91	197	482	128	148	387	157	208	386	134
ENSG00000271806.1	chr1	2141084	2145279	-	4196	52	28	44	50	18	31	40	75	57	0	46	57	23	123	24	95	72	89	27	58	102	53	109	16	22	43	46	67	76	23	61	21	65	106	11	26	98	13	31	15	59	56	29	19
ENSG00000182873.5	chr1;chr1;chr1;chr1;chr1	2181794;2182735;2183571;2183571;2183991	2182741;2182823;2183704;2183875;2184389	-;-;-;-;-	1734	41	5	60	19	27	56	62	91	65	28	71	51	48	95	81	36	32	57	81	25	102	44	86	8	37	17	61	58	51	27	77	60	26	73	51	97	42	77	68	32	31	53	63	27
ENSG00000162585.17	chr1;chr1;chr1;chr1;chr1;chr1;chr1;chr1;chr1;chr1;chr1;chr1;chr1;chr1;chr1;chr1;chr1;chr1;chr1;chr1;chr1;chr1;chr1;chr1;chr1;chr1;chr1;chr1;chr1;chr1;chr1;chr1;chr1;chr1;chr1;chr1;chr1;chr1;chr1;chr1;chr1;chr1;chr1;chr1;chr1;chr1;chr1;chr1;chr1;chr1;chr1;chr1;chr1;chr1;chr1;chr1;chr1;chr1;chr1;chr1;chr1;chr1;chr1;chr1;chr1;chr1;chr1	2184461;2184464;2184478;2184478;2185175;2186004;2186004;2186838;2186838;2189544;2189548;2189548;2189548;2189548;2189569;2189580;2189713;2189713;2191901;2192647;2192845;2193639;2193639;2193639;2193639;2193639;2193639;2193639;2193639;2193639;2193639;2193639;2193639;2193998;2193998;2193998;2193998;2193998;2193998;2193998;2193998;2193998;2194688;2194688;2194688;2194688;2194688;2194688;2194688;2194688…	2185513;2185513;2185513;2185513;2185513;2186249;2186249;2187206;2187206;2193910;2189781;2189781;2189781;2189781;2189781;2189781;2189781;2189781;2192975;2192975;2192975;2193910;2193910;2193910;2193910;2193910;2193910;2193910;2193910;2193910;2193910;2193910;2193910;2194133;2194133;2194213;2194133;2194108;2194133;2194133;2194133;2194133;2194748;2194739;2194772;2194750;2194751;2194775;2194741;2194775…	-;-;-;-;-;-;-;-;-;-;-;-;-;-;-;-;-;-;-;-;-;-;-;-;-;-;-;-;-;-;-;-;-;-;-;-;-;-;-;-;-;-;-;-;-;-;-;-;-;-;-;-;-;-;-;-;-;-;-;-;-;-;-;-;-;-;-	10916	266	111	216	288	554	571	394	427	672	290	837	280	149	585	431	483	367	285	250	297	444	435	589	132	126	353	538	493	522	345	484	324	428	394	334	409	575	355	369	583	242	305	472	208
ENSG00000234396.3	chr1;chr1	2212523;2220535	2212644;2220738	+;+	326	0	0	1	0	1	0	0	9	2	0	0	0	1	0	0	3	0	0	0	0	12	2	26	0	0	1	4	5	2	9	5	0	0	1	0	0	9	0	0	0	0	0	0	0
ENSG00000157933.10	chr1;chr1;chr1;chr1;chr1;chr1;chr1;chr1;chr1;chr1;chr1;chr1;chr1;chr1	2228319;2232479;2247996;2302978;2302978;2302978;2303285;2303285;2303646;2303840;2304293;2304293;2306020;2306577	2229735;2232669;2248071;2303038;2303103;2303103;2303376;2303400;2304108;2304102;2304368;2304585;2306250;2310213	+;+;+;+;+;+;+;+;+;+;+;+;+;+	6550	1613	544	531	979	1902	1519	2665	592	1783	2039	1888	1926	748	1674	1637	1212	491	1381	1184	1446	1151	1626	575	854	2185	2070	2960	2396	1119	1841	1041	2570	2785	1921	948	1528	628	1386	2056	2812	1327	1134	2115	1288
ENSG00000287356.1	chr1;chr1;chr1;chr1;chr1;chr1;chr1	2315040;2315040;2316392;2316392;2317611;2318990;2318990	2315998;2315998;2317011;2317011;2317729;2321323;2323085	+;+;+;+;+;+;+	5794	188	21	17	118	23	40	48	102	61	96	75	107	8	154	135	119	90	59	3	15	116	146	256	4	15	103	139	144	52	69	87	47	13	71	69	82	191	71	104	431	50	36	77	27
ENSG00000116151.14	chr1;chr1;chr1;chr1;chr1;chr1;chr1;chr1;chr1;chr1;chr1;chr1;chr1;chr1;chr1;chr1;chr1;chr1;chr1;chr1;chr1;chr1;chr1;chr1;chr1;chr1;chr1;chr1;chr1;chr1;chr1;chr1;chr1;chr1;chr1;chr1;chr1;chr1;chr1;chr1;chr1;chr1;chr1;chr1;chr1;chr1;chr1;chr1;chr1;chr1;chr1;chr1;chr1;chr1;chr1;chr1;chr1;chr1;chr1;chr1;chr1;chr1;chr1;chr1;chr1;chr1;chr1	2321253;2324097;2332126;2336469;2336469;2336717;2336717;2355175;2357432;2357432;2357432;2358592;2358592;2358592;2358638;2371165;2371676;2372481;2372481;2372481;2372481;2372481;2374461;2374461;2374461;2374461;2374461;2374461;2374853;2375599;2378055;2379109;2384978;2384978;2384978;2384978;2384978;2384978;2384978;2385372;2385807;2385807;2385807;2385807;2385807;2385807;2387056;2387419;2387419;2387419…	2321579;2324143;2332753;2336548;2336548;2336850;2336850;2355464;2357598;2357598;2357598;2358715;2358715;2358715;2358715;2372591;2371905;2372591;2372591;2372591;2372591;2372591;2374557;2374557;2374557;2374557;2374557;2374557;2379227;2375878;2378980;2379227;2385065;2385065;2385158;2385121;2385065;2385065;2385065;2388509;2385897;2385897;2385897;2385897;2385897;2385897;2387529;2387529;2387529;2387529…	-;-;-;-;-;-;-;-;-;-;-;-;-;-;-;-;-;-;-;-;-;-;-;-;-;-;-;-;-;-;-;-;-;-;-;-;-;-;-;-;-;-;-;-;-;-;-;-;-;-;-;-;-;-;-;-;-;-;-;-;-;-;-;-;-;-;-	11337	865	59	150	395	363	540	472	442	431	218	612	293	93	876	376	321	322	397	181	197	433	546	600	34	108	329	301	588	296	273	604	195	333	457	327	369	462	233	249	1048	105	324	435	284
ENSG00000272161.1	chr1	2326201	2326693	-	493	46	0	0	5	0	0	3	13	0	0	10	1	11	6	11	1	4	2	0	0	19	11	10	5	0	8	2	3	2	0	7	0	0	5	1	9	24	0	8	24	0	2	2	7
ENSG00000269896.2	chr1;chr1	2350414;2351644	2352820;2351857	-;-	2407	94	2	29	118	52	26	73	73	41	11	126	41	44	64	53	56	38	23	9	45	94	68	76	21	1	42	43	50	18	54	90	36	32	64	81	90	87	13	19	56	17	23	11	64
ENSG00000272420.1	chr1	2363061	2363628	-	568	28	2	0	2	24	6	31	19	2	0	22	9	6	41	14	1	0	7	3	0	15	0	22	0	0	0	11	10	19	16	5	0	4	27	12	2	13	1	0	21	1	6	10	0
ENSG00000157916.20	chr1;chr1;chr1;chr1;chr1;chr1;chr1;chr1;chr1;chr1;chr1;chr1;chr1;chr1;chr1;chr1;chr1;chr1;chr1;chr1;chr1;chr1;chr1;chr1;chr1;chr1;chr1;chr1;chr1;chr1;chr1;chr1;chr1;chr1;chr1;chr1;chr1;chr1;chr1;chr1;chr1;chr1;chr1;chr1;chr1;chr1;chr1;chr1;chr1	2391775;2391828;2391841;2391843;2391857;2391890;2393174;2394005;2395608;2395784;2395784;2395784;2395784;2395784;2395784;2395784;2397116;2397116;2397116;2397116;2397116;2397116;2397116;2399415;2399415;2399415;2399415;2399415;2400857;2400857;2400857;2400857;2400857;2400857;2400857;2401951;2402097;2402207;2402207;2402207;2402207;2402207;2402207;2403035;2403035;2403035;2403035;2403035;2403035	2391958;2391958;2391958;2391958;2391958;2391958;2393231;2395871;2395648;2395871;2395871;2395871;2396367;2395871;2395871;2395871;2397220;2397220;2397220;2397220;2397220;2397220;2397220;2399514;2399514;2399514;2399514;2399514;2400935;2400935;2400935;2400935;2400935;2400935;2400935;2402342;2402342;2402342;2402316;2402342;2402342;2402342;2402325;2403216;2403227;2403751;2403064;2405436;2405442	+;+;+;+;+;+;+;+;+;+;+;+;+;+;+;+;+;+;+;+;+;+;+;+;+;+;+;+;+;+;+;+;+;+;+;+;+;+;+;+;+;+;+;+;+;+;+;+;+	5689	748	314	266	566	1058	920	745	321	667	517	832	579	175	930	998	656	333	518	463	559	547	612	244	90	1083	607	926	680	447	637	475	630	866	816	384	792	288	471	349	840	718	908	722	656
ENSG00000157911.11	chr1;chr1;chr1;chr1;chr1;chr1;chr1;chr1;chr1;chr1;chr1;chr1;chr1;chr1;chr1;chr1;chr1;chr1;chr1;chr1;chr1;chr1;chr1;chr1;chr1;chr1;chr1;chr1;chr1;chr1;chr1;chr1;chr1;chr1;chr1;chr1;chr1;chr1;chr1;chr1;chr1;chr1;chr1	2403964;2403974;2404061;2404613;2404838;2405031;2406484;2406484;2406484;2406484;2406518;2406720;2406720;2406720;2406720;2406720;2408452;2408452;2408452;2408452;2408456;2408530;2408583;2408604;2408755;2409678;2410261;2410371;2410371;2410371;2410371;2410371;2410371;2410371;2410630;2410630;2412391;2412391;2412391;2412391;2412391;2412391;2413597	2405834;2405834;2404371;2404891;2405828;2405834;2406619;2406619;2406619;2406619;2406619;2406895;2406895;2406895;2406895;2406955;2408858;2408858;2408858;2408858;2408858;2408858;2408858;2408858;2408858;2410004;2410451;2410451;2410451;2410451;2410451;2410451;2410451;2410451;2410868;2410836;2412514;2412540;2412535;2412456;2412564;2412564;2413797	-;-;-;-;-;-;-;-;-;-;-;-;-;-;-;-;-;-;-;-;-;-;-;-;-;-;-;-;-;-;-;-;-;-;-;-;-;-;-;-;-;-;-	3782	175	33	35	70	197	108	206	146	231	41	126	154	28	206	206	126	70	99	215	110	167	170	184	23	184	166	195	88	80	72	132	95	103	83	43	179	146	86	73	134	150	89	231	107
ENSG00000149527.18	chr1;chr1;chr1;chr1;chr1;chr1;chr1;chr1;chr1;chr1;chr1;chr1;chr1;chr1;chr1;chr1;chr1;chr1;chr1;chr1;chr1;chr1;chr1;chr1;chr1;chr1;chr1;chr1;chr1;chr1;chr1;chr1;chr1;chr1;chr1;chr1;chr1;chr1;chr1;chr1;chr1;chr1;chr1;chr1;chr1;chr1;chr1;chr1;chr1;chr1;chr1;chr1;chr1;chr1;chr1;chr1;chr1;chr1;chr1;chr1;chr1;chr1;chr1;chr1;chr1;chr1;chr1;chr1;chr1;chr1;chr1;chr1;chr1;chr1;chr1;chr1;chr1;chr1;chr1;chr1…	2425980;2430338;2467459;2476289;2476315;2478476;2478476;2478476;2478476;2479090;2479734;2479734;2479734;2479734;2479888;2480183;2480184;2480184;2480184;2480184;2484448;2484448;2484448;2484448;2484448;2486907;2486907;2486907;2486907;2486907;2487173;2487173;2487173;2487173;2487173;2487598;2487598;2487598;2487598;2487598;2489207;2489207;2489207;2489207;2489207;2489760;2489760;2489760;2489760;2489760…	2426037;2430629;2467662;2476712;2476712;2478622;2478622;2478622;2478622;2479978;2479978;2479977;2479804;2479978;2479978;2480312;2480312;2480312;2480312;2480312;2484618;2484618;2484618;2484618;2484618;2487000;2487000;2487000;2487000;2487000;2487376;2487376;2487376;2487376;2487376;2487718;2487718;2487718;2487718;2487718;2489378;2489378;2489378;2489378;2489378;2489867;2489867;2489867;2489867;2489867…	+;+;+;+;+;+;+;+;+;+;+;+;+;+;+;+;+;+;+;+;+;+;+;+;+;+;+;+;+;+;+;+;+;+;+;+;+;+;+;+;+;+;+;+;+;+;+;+;+;+;+;+;+;+;+;+;+;+;+;+;+;+;+;+;+;+;+;+;+;+;+;+;+;+;+;+;+;+;+;+;+;+;+;+;+;+;+;+;+;+;+;+;+;+;+;+;+;+;+;+;+;+;+;+;+;+;+;+;+;+;+;+;+;+;+;+;+;+	10809	218	9	181	108	310	423	176	410	126	145	636	202	347	73	102	246	144	189	113	508	332	189	479	37	21	434	483	314	94	589	423	418	383	463	256	307	382	19	239	623	236	190	230	129
ENSG00000224387.1	chr1;chr1	2492300;2493101	2492596;2493258	-;-	455	19	0	2	3	5	12	0	10	1	3	6	0	10	0	12	13	10	2	3	4	25	10	38	3	0	10	1	0	2	20	9	0	15	14	9	10	23	0	0	34	4	4	4	0
ENSG00000229393.1	chr1;chr1	2493437;2494383	2493853;2494479	-;-	514	9	0	14	8	7	18	3	22	7	0	9	1	5	21	8	2	6	2	17	6	7	1	4	0	0	17	8	0	0	15	46	0	3	2	17	7	12	0	7	11	0	0	12	0
ENSG00000157881.16	chr1;chr1;chr1;chr1;chr1;chr1;chr1;chr1;chr1;chr1;chr1;chr1;chr1;chr1;chr1;chr1;chr1;chr1;chr1;chr1;chr1;chr1;chr1;chr1;chr1;chr1;chr1;chr1;chr1;chr1;chr1;chr1;chr1;chr1;chr1;chr1;chr1;chr1;chr1;chr1;chr1;chr1;chr1;chr1;chr1;chr1;chr1;chr1;chr1;chr1;chr1;chr1;chr1;chr1;chr1;chr1;chr1;chr1;chr1;chr1;chr1;chr1;chr1;chr1;chr1;chr1;chr1;chr1;chr1;chr1;chr1;chr1;chr1;chr1;chr1;chr1;chr1;chr1;chr1;chr1…	2508537;2508537;2508795;2509793;2509862;2509862;2509862;2510057;2510057;2510057;2510057;2510293;2510678;2510678;2510678;2510678;2511338;2511338;2511338;2511338;2511338;2511628;2511628;2511628;2511628;2511628;2512406;2512888;2512888;2512888;2512888;2512888;2514002;2514002;2514002;2514002;2514002;2514354;2514354;2514354;2514354;2514413;2514433;2515258;2515562;2515562;2515562;2515562;2515562;2518164…	2509060;2509060;2509060;2509930;2509930;2509930;2509930;2510157;2510157;2510157;2510157;2510782;2510748;2510748;2510782;2510782;2511387;2511387;2511387;2511387;2511387;2511683;2511683;2511683;2511683;2511683;2513039;2513039;2513013;2513039;2513039;2513039;2514085;2514089;2514089;2514089;2514089;2514403;2514466;2514466;2514466;2514466;2514466;2515401;2515717;2515937;2515717;2515717;2515717;2518264…	-;-;-;-;-;-;-;-;-;-;-;-;-;-;-;-;-;-;-;-;-;-;-;-;-;-;-;-;-;-;-;-;-;-;-;-;-;-;-;-;-;-;-;-;-;-;-;-;-;-;-;-;-;-;-;-;-;-;-;-;-;-;-;-;-;-;-;-;-;-;-;-;-;-;-;-;-;-;-;-;-;-;-;-;-;-;-;-;-;-	5072	164	81	80	89	143	237	248	215	176	154	310	205	69	133	212	146	110	179	80	266	328	170	416	75	169	274	263	186	197	137	246	198	235	246	166	226	342	182	265	238	176	235	175	228
ENSG00000197921.6	chr1;chr1;chr1	2528745;2529846;2530111	2529749;2530011;2530263	-;-;-	1324	0	0	0	0	1	13	9	26	10	0	5	0	7	0	3	11	1	4	0	9	45	1	26	2	0	5	5	3	21	0	24	2	0	4	5	0	35	2	0	0	5	20	10	1
ENSG00000272449.2	chr1;chr1;chr1	2530064;2545969;2546400	2530102;2547460;2547460	+;+;+	1531	3	9	31	31	47	10	2	31	35	31	60	13	25	46	90	22	3	20	13	42	52	40	76	19	1	12	36	37	18	22	15	5	3	6	3	18	63	7	4	15	35	42	17	60
ENSG00000238164.6	chr1;chr1;chr1;chr1;chr1;chr1;chr1;chr1;chr1;chr1;chr1;chr1;chr1;chr1;chr1;chr1;chr1;chr1;chr1	2549920;2549920;2549920;2550074;2550283;2550573;2550992;2550992;2550992;2551775;2553626;2554101;2554101;2554241;2554724;2555681;2556428;2556977;2556977	2550119;2550274;2550274;2550274;2550731;2550731;2551598;2554150;2552106;2552703;2553814;2554296;2554245;2554296;2556696;2555869;2556696;2557031;2557011	-;-;-;-;-;-;-;-;-;-;-;-;-;-;-;-;-;-;-	6137	88	4	28	132	107	142	180	210	76	88	259	14	54	177	63	140	59	108	97	219	177	114	257	41	9	89	237	109	83	163	178	138	123	116	109	56	194	90	54	132	108	119	208	86
ENSG00000157873.17	chr1;chr1;chr1;chr1;chr1;chr1;chr1;chr1;chr1;chr1;chr1;chr1;chr1;chr1;chr1;chr1;chr1;chr1;chr1;chr1;chr1;chr1;chr1;chr1;chr1;chr1;chr1;chr1;chr1;chr1;chr1;chr1;chr1;chr1;chr1;chr1;chr1;chr1;chr1;chr1;chr1;chr1;chr1;chr1;chr1;chr1;chr1;chr1;chr1;chr1;chr1;chr1;chr1;chr1;chr1;chr1;chr1;chr1;chr1;chr1;chr1;chr1;chr1;chr1;chr1;chr1;chr1;chr1;chr1;chr1;chr1;chr1;chr1;chr1;chr1;chr1;chr1;chr1;chr1;chr1…	2555639;2555791;2555802;2555980;2556222;2556366;2556386;2556405;2556406;2556557;2556571;2556585;2556585;2556585;2556585;2556585;2557726;2557726;2557726;2557726;2557726;2557726;2557726;2557726;2557726;2557726;2557813;2558343;2558343;2558343;2558343;2558343;2558343;2558343;2558343;2558343;2558343;2558343;2558881;2559352;2559580;2559823;2559823;2559823;2559823;2559823;2559823;2559823;2560554;2560624…	2555667;2555850;2556252;2556032;2556261;2556733;2556455;2556733;2556733;2556733;2556733;2556733;2556733;2556733;2556733;2556733;2557834;2557834;2557834;2557834;2557834;2557834;2557834;2557834;2557834;2557834;2557834;2559978;2559978;2558468;2558862;2558468;2558468;2558468;2558468;2558468;2558468;2558468;2559156;2559978;2559978;2559978;2559978;2559978;2559978;2559978;2559978;2559978;2560714;2560714…	+;+;+;+;+;+;+;+;+;+;+;+;+;+;+;+;+;+;+;+;+;+;+;+;+;+;+;+;+;+;+;+;+;+;+;+;+;+;+;+;+;+;+;+;+;+;+;+;+;+;+;+;+;+;+;+;+;+;+;+;+;+;+;+;+;+;+;+;+;+;+;+;+;+;+;+;+;+;+;+;+;+;+;+;+	6219	917	96	211	854	866	1202	880	567	841	702	1327	487	255	864	692	580	382	533	544	1052	480	823	325	229	280	801	970	1366	565	763	1214	1010	858	869	495	519	406	514	781	881	612	687	635	604
ENSG00000225931.3	chr1;chr1;chr1	2566410;2567866;2568977	2566605;2568054;2569888	+;+;+	1297	61	0	5	27	17	21	21	31	37	17	49	53	23	54	40	11	18	4	2	17	56	1	80	3	2	3	53	64	8	36	48	22	21	77	11	16	51	19	48	26	12	45	16	24
ENSG00000228037.1	chr1;chr1;chr1	2581560;2583370;2584125	2581650;2583495;2584533	+;+;+	626	0	1	0	8	1	5	20	26	6	0	7	1	0	1	16	6	20	0	0	0	40	0	55	3	1	10	1	14	11	0	2	5	6	10	14	0	23	0	1	6	4	15	10	14
ENSG00000157870.17	chr1;chr1;chr1;chr1;chr1;chr1;chr1;chr1;chr1;chr1;chr1;chr1;chr1;chr1;chr1;chr1;chr1;chr1;chr1;chr1;chr1;chr1;chr1;chr1;chr1;chr1;chr1;chr1;chr1;chr1;chr1;chr1;chr1;chr1;chr1;chr1;chr1;chr1;chr1;chr1;chr1;chr1;chr1;chr1;chr1;chr1;chr1;chr1;chr1;chr1;chr1;chr1;chr1;chr1;chr1;chr1;chr1;chr1;chr1;chr1;chr1;chr1;chr1;chr1;chr1;chr1;chr1;chr1;chr1;chr1;chr1;chr1;chr1;chr1;chr1;chr1;chr1;chr1;chr1;chr1…	2586491;2586540;2586750;2586750;2586777;2586780;2586796;2586798;2586817;2586833;2586877;2587042;2587078;2587085;2587091;2587091;2587091;2587091;2587091;2587091;2587091;2587091;2587091;2587091;2587114;2587741;2587741;2587741;2587741;2587741;2587741;2587741;2587741;2587741;2587741;2587741;2587741;2587741;2587741;2588336;2588336;2588390;2588390;2588390;2588390;2588390;2588390;2588390;2588390;2588390…	2586591;2586591;2586948;2586948;2586948;2586948;2586948;2586948;2586873;2586948;2586948;2587295;2587295;2587295;2587295;2587295;2587295;2587295;2587295;2587295;2587295;2587295;2587295;2587295;2587295;2587792;2587792;2587792;2587792;2587792;2587792;2587792;2587792;2587792;2587792;2587792;2587792;2587792;2587792;2588453;2588453;2588745;2588453;2588453;2588453;2588453;2588453;2588453;2588453;2588453…	+;+;+;+;+;+;+;+;+;+;+;+;+;+;+;+;+;+;+;+;+;+;+;+;+;+;+;+;+;+;+;+;+;+;+;+;+;+;+;+;+;+;+;+;+;+;+;+;+;+;+;+;+;+;+;+;+;+;+;+;+;+;+;+;+;+;+;+;+;+;+;+;+;+;+;+;+;+;+;+;+;+;+;+;+;+;+;+;+	3371	187	77	77	210	794	251	257	117	113	122	534	233	117	212	238	95	38	76	259	117	125	253	197	67	144	119	192	294	109	157	194	137	164	189	129	223	167	135	79	833	158	148	366	238
ENSG00000142606.16	chr1;chr1;chr1;chr1;chr1;chr1;chr1;chr1;chr1;chr1;chr1;chr1;chr1;chr1;chr1;chr1;chr1;chr1;chr1;chr1;chr1;chr1;chr1;chr1;chr1;chr1;chr1;chr1;chr1;chr1;chr1;chr1;chr1;chr1;chr1;chr1;chr1;chr1;chr1;chr1;chr1;chr1;chr1;chr1;chr1;chr1;chr1;chr1;chr1;chr1;chr1;chr1;chr1;chr1;chr1;chr1;chr1;chr1;chr1;chr1;chr1;chr1;chr1;chr1;chr1;chr1;chr1;chr1;chr1;chr1;chr1;chr1;chr1;chr1;chr1;chr1;chr1;chr1;chr1;chr1…	2590639;2590639;2590926;2590926;2591557;2591557;2591557;2591557;2591694;2591694;2591932;2591932;2591932;2592655;2592655;2592655;2592655;2592655;2592655;2592721;2592833;2592833;2592833;2592833;2593814;2593814;2593814;2593814;2594385;2594385;2594385;2594790;2594790;2594790;2595276;2595276;2595276;2596009;2596009;2596009;2596561;2596561;2596561;2598207;2598207;2598207;2598654;2598654;2598654;2603884…	2591089;2591089;2591089;2591089;2591633;2591633;2591633;2591633;2592027;2592027;2592027;2592027;2592027;2592720;2592879;2592720;2592720;2592720;2592678;2592868;2592966;2592966;2592966;2592966;2594073;2593962;2593933;2593933;2594443;2594443;2594443;2594893;2594893;2594893;2595359;2595359;2595359;2596107;2596107;2596107;2596689;2596689;2596689;2598300;2598300;2598300;2598790;2598790;2598790;2603973…	-;-;-;-;-;-;-;-;-;-;-;-;-;-;-;-;-;-;-;-;-;-;-;-;-;-;-;-;-;-;-;-;-;-;-;-;-;-;-;-;-;-;-;-;-;-;-;-;-;-;-;-;-;-;-;-;-;-;-;-;-;-;-;-;-;-;-;-;-;-;-;-;-;-;-;-;-;-;-;-;-;-;-	3870	12	0	5	22	13	15	12	159	5	53	8	28	10	9	46	72	47	29	12	14	209	37	309	7	10	5	56	23	18	64	1	1	0	35	17	19	180	3	7	56	2	8	48	6
ENSG00000237058.1	chr1;chr1	2632568;2636356	2632675;2636620	+;+	373	0	0	0	0	0	0	0	1	0	0	0	0	0	0	0	0	5	0	0	0	3	0	4	0	0	0	1	0	0	0	0	0	0	0	3	0	7	0	0	0	0	0	0	0
ENSG00000215912.12	chr1;chr1;chr1;chr1;chr1;chr1;chr1;chr1;chr1;chr1;chr1;chr1;chr1;chr1;chr1;chr1	2635976;2641368;2644264;2644264;2645293;2645293;2783609;2783609;2785819;2785819;2787481;2787481;2789503;2789503;2800044;2801577	2641895;2641895;2644478;2644478;2645563;2645563;2783775;2783775;2786023;2786023;2787706;2787706;2789665;2790346;2800868;2801717	-;-;-;-;-;-;-;-;-;-;-;-;-;-;-;-	8814	155	10	28	76	186	59	101	184	66	41	63	35	11	127	121	282	69	26	12	39	247	95	377	24	12	65	94	241	152	161	321	105	124	132	109	27	188	62	116	103	34	58	112	88
ENSG00000285945.1	chr1;chr1;chr1	2768091;2777299;2784348	2768091;2777504;2784733	+;+;+	593	0	0	0	8	0	0	4	13	0	0	0	0	0	0	22	14	6	2	0	0	29	0	22	0	0	0	0	12	1	0	0	0	3	0	0	0	11	0	0	0	0	0	0	1
ENSG00000283259.1	chr1;chr1;chr1;chr1;chr1;chr1;chr1;chr1;chr1;chr1	2773603;2773947;2774230;2774790;2774993;2775155;2775357;2775519;2776049;2776370	2773864;2774066;2774709;2774910;2775072;2775274;2775437;2775634;2776129;2776473	+;+;+;+;+;+;+;+;+;+	1565	0	0	0	3	1	0	8	73	0	0	0	0	0	9	0	6	70	4	0	0	74	0	97	0	0	0	11	2	0	2	0	0	0	0	6	0	92	0	1	4	0	0	0	0
ENSG00000233234.1	chr1;chr1	2811850;2812235	2811998;2812692	-;-	607	0	0	0	0	0	0	0	29	0	0	0	0	0	0	0	6	13	0	0	0	56	0	42	0	0	0	1	0	5	0	0	0	0	0	3	0	16	0	4	0	0	0	0	1
ENSG00000287396.1	chr1;chr1	2814056;2817501	2814451;2817767	+;+	663	0	0	0	0	0	0	0	63	0	0	0	0	0	0	0	37	19	0	0	0	95	0	57	0	0	0	1	0	1	0	0	0	0	0	1	0	19	1	0	0	0	0	0	0
ENSG00000231630.1	chr1;chr1	2814432;2814827	2814688;2814998	-;-	429	0	0	0	0	0	0	0	4	0	0	0	0	0	0	0	0	0	0	0	0	20	0	15	1	7	0	0	0	0	0	0	0	0	0	0	0	1	5	0	0	0	0	0	0
ENSG00000284745.1	chr1;chr1;chr1;chr1;chr1;chr1	2960658;2961018;2961672;2961672;2963264;2968563	2961585;2961585;2962100;2962100;2963415;2968707	-;-;-;-;-;-	1654	0	0	0	0	0	0	0	61	0	0	0	0	0	0	0	136	6	0	0	0	61	0	90	1	0	0	1	0	4	0	0	0	0	0	2	0	56	1	0	0	0	0	0	0
ENSG00000169717.7	chr1	3021467	3022903	+	1437	0	0	0	0	0	0	0	33	0	0	0	0	0	0	0	20	39	0	0	0	47	0	74	3	0	0	0	0	4	0	0	0	0	0	0	0	39	2	2	0	0	0	0	0
ENSG00000177133.11	chr1;chr1;chr1;chr1;chr1;chr1;chr1;chr1;chr1;chr1;chr1;chr1;chr1;chr1;chr1;chr1;chr1;chr1;chr1;chr1;chr1;chr1;chr1;chr1;chr1;chr1;chr1;chr1;chr1;chr1;chr1;chr1;chr1	3059615;3059615;3059617;3059617;3059617;3059624;3059638;3060230;3060230;3060230;3060230;3060501;3060501;3060501;3060501;3061107;3061107;3061107;3061107;3061107;3061289;3061591;3061591;3061591;3061959;3062195;3062290;3063446;3064072;3064212;3067337;3067337;3068222	3059737;3062531;3059737;3060283;3059737;3059737;3060283;3060283;3060283;3060283;3060283;3061331;3060604;3060604;3060604;3062742;3064055;3061331;3062032;3061331;3061331;3061866;3061751;3061813;3062192;3062395;3063786;3063682;3064302;3064302;3067769;3068048;3068437	-;-;-;-;-;-;-;-;-;-;-;-;-;-;-;-;-;-;-;-;-;-;-;-;-;-;-;-;-;-;-;-;-	5600	10	0	0	40	5	15	11	111	6	69	2	15	17	23	18	41	58	18	7	25	151	21	195	19	0	13	72	32	13	13	9	86	14	48	14	30	138	8	58	1	16	15	26	19
ENSG00000142611.17	chr1;chr1;chr1;chr1;chr1;chr1;chr1;chr1;chr1;chr1;chr1;chr1;chr1;chr1;chr1;chr1;chr1;chr1;chr1;chr1;chr1;chr1;chr1;chr1;chr1;chr1;chr1;chr1;chr1;chr1;chr1;chr1;chr1;chr1;chr1;chr1;chr1;chr1;chr1;chr1;chr1;chr1;chr1;chr1;chr1;chr1;chr1;chr1;chr1;chr1;chr1;chr1;chr1;chr1;chr1;chr1;chr1;chr1;chr1;chr1;chr1;chr1;chr1;chr1;chr1;chr1;chr1;chr1;chr1;chr1;chr1;chr1;chr1;chr1;chr1;chr1;chr1;chr1;chr1;chr1…	3069168;3069183;3069197;3069203;3069211;3186125;3186125;3186125;3186125;3186125;3237931;3244087;3244087;3244087;3244087;3244087;3244132;3385149;3385149;3385152;3385152;3385152;3385152;3386676;3396491;3396491;3396491;3396491;3396491;3396491;3402791;3402791;3402791;3402791;3402791;3402791;3404739;3404739;3404739;3404739;3404739;3404739;3405495;3405495;3405495;3405495;3405495;3405495;3411384;3411384…	3069296;3069296;3069296;3069296;3069296;3186474;3186474;3186474;3186591;3186474;3238095;3244137;3244137;3244137;3244137;3244137;3244137;3385286;3385286;3385286;3385286;3385286;3385286;3386918;3396593;3396593;3396593;3396593;3396593;3396593;3402998;3402998;3402998;3402998;3402998;3402998;3404886;3404886;3404886;3404886;3404886;3404886;3405648;3405648;3405648;3405648;3405648;3405648;3412800;3412800…	+;+;+;+;+;+;+;+;+;+;+;+;+;+;+;+;+;+;+;+;+;+;+;+;+;+;+;+;+;+;+;+;+;+;+;+;+;+;+;+;+;+;+;+;+;+;+;+;+;+;+;+;+;+;+;+;+;+;+;+;+;+;+;+;+;+;+;+;+;+;+;+;+;+;+;+;+;+;+;+;+;+;+;+;+;+;+;+;+;+;+;+;+;+;+;+;+;+;+;+;+;+;+;+;+;+;+	9767	88	0	26	31	29	32	61	187	55	192	17	53	40	46	31	178	102	13	62	73	346	25	645	62	9	66	213	60	142	45	8	175	106	151	67	35	387	62	101	49	53	21	137	12
ENSG00000283572.1	chr1	3127975	3128035	+	61	0	0	0	0	0	0	0	0	0	0	0	0	0	0	0	0	1	0	0	0	0	0	6	0	0	0	0	0	0	4	0	0	8	0	0	0	6	2	1	0	0	3	0	0
ENSG00000226286.1	chr1;chr1	3132927;3133573	3133258;3133709	-;-	469	4	0	0	0	0	0	0	15	0	2	0	0	0	0	0	1	4	0	0	6	8	1	31	2	0	0	18	11	0	0	0	0	0	1	0	0	0	4	1	0	0	0	0	3
ENSG00000279839.1	chr1	3205988	3208664	+	2677	0	1	0	2	0	2	2	44	7	0	0	0	2	0	0	47	13	4	0	7	72	0	105	4	3	4	6	10	36	15	0	22	14	4	8	0	53	9	5	0	0	0	10	9
ENSG00000272235.1	chr1	3306636	3310096	-	3461	0	0	0	0	0	11	9	135	20	1	0	0	24	0	6	27	48	5	9	5	135	1	227	6	4	1	27	26	40	1	0	39	6	59	39	0	105	5	16	12	6	0	20	3
ENSG00000287828.1	chr1;chr1	3313052;3322884	3313513;3323149	-;-	728	8	0	0	2	0	0	10	36	0	0	0	1	4	0	0	25	29	0	0	2	49	4	66	7	0	3	1	0	21	11	0	0	13	31	19	0	32	5	2	2	0	0	18	0
ENSG00000286518.1	chr1;chr1	3367815;3372952	3369621;3373928	-;-	2784	4	0	0	2	4	0	3	88	16	0	0	27	0	13	0	58	75	2	7	25	100	0	127	1	3	4	44	2	8	14	0	24	8	21	4	0	54	4	23	0	2	4	24	1
ENSG00000130762.15	chr1;chr1;chr1;chr1;chr1;chr1;chr1;chr1;chr1;chr1;chr1;chr1;chr1;chr1;chr1;chr1;chr1;chr1;chr1;chr1;chr1;chr1;chr1;chr1;chr1;chr1;chr1;chr1;chr1;chr1;chr1;chr1;chr1;chr1;chr1;chr1;chr1;chr1;chr1;chr1;chr1;chr1;chr1;chr1;chr1;chr1;chr1;chr1;chr1;chr1;chr1;chr1;chr1;chr1;chr1;chr1;chr1;chr1;chr1;chr1	3454665;3463066;3466005;3466148;3466971;3467168;3467168;3468544;3468880;3468880;3468880;3469433;3469433;3469433;3469433;3471607;3471624;3472769;3473078;3473078;3473078;3473078;3473078;3473078;3473393;3473393;3473393;3473393;3473393;3473393;3473393;3474708;3474708;3474708;3474708;3474708;3475970;3475970;3475970;3475970;3475970;3477875;3477875;3477875;3477875;3478424;3478424;3478424;3479517;3479517…	3454811;3463672;3466193;3466193;3467337;3467337;3467337;3468936;3468936;3468936;3468936;3469593;3469593;3469593;3469593;3471791;3471791;3473230;3473230;3473230;3473230;3473230;3473230;3473230;3473522;3473522;3473521;3474457;3473522;3473522;3473522;3474782;3474782;3474782;3474782;3474782;3476062;3476019;3476062;3476062;3476062;3478612;3478026;3478026;3478026;3478612;3478612;3478612;3479590;3479590…	+;+;+;+;+;+;+;+;+;+;+;+;+;+;+;+;+;+;+;+;+;+;+;+;+;+;+;+;+;+;+;+;+;+;+;+;+;+;+;+;+;+;+;+;+;+;+;+;+;+;+;+;+;+;+;+;+;+;+;+	5324	474	96	195	238	340	763	363	226	434	256	721	605	44	431	214	226	104	248	255	239	210	329	279	74	193	459	274	136	350	224	293	53	402	204	146	333	221	106	208	600	177	202	268	394
ENSG00000272088.1	chr1	3487246	3487627	+	382	78	0	0	1	0	12	12	30	27	0	0	0	0	53	0	58	13	25	26	0	21	8	13	0	2	16	18	0	5	8	0	2	12	6	5	4	34	12	57	30	1	2	25	3
ENSG00000162591.16	chr1;chr1;chr1;chr1;chr1;chr1;chr1;chr1;chr1;chr1;chr1;chr1;chr1;chr1;chr1;chr1;chr1;chr1;chr1;chr1;chr1;chr1;chr1;chr1;chr1;chr1;chr1;chr1;chr1;chr1;chr1;chr1;chr1;chr1;chr1;chr1;chr1;chr1;chr1;chr1;chr1;chr1;chr1;chr1;chr1;chr1;chr1;chr1;chr1;chr1;chr1;chr1;chr1;chr1;chr1;chr1;chr1;chr1;chr1;chr1;chr1;chr1;chr1;chr1;chr1;chr1;chr1;chr1;chr1;chr1;chr1;chr1;chr1;chr1;chr1;chr1;chr1;chr1;chr1;chr1…	3487951;3489920;3490312;3490562;3490912;3490912;3490912;3490925;3492639;3492639;3492639;3492639;3492639;3492639;3492728;3493771;3493771;3493771;3493771;3493771;3493996;3493996;3493996;3493996;3493996;3494371;3494371;3494371;3494371;3494371;3494613;3494613;3494613;3494613;3495890;3495890;3495890;3495890;3495890;3496655;3496655;3496655;3496655;3496988;3496988;3497233;3497233;3497233;3497491;3498371…	3490589;3490589;3490589;3490589;3490959;3490959;3490959;3490959;3492767;3492767;3492767;3493486;3492767;3492767;3492767;3493899;3493899;3493899;3493797;3493899;3494244;3494124;3494124;3494124;3494124;3494741;3494499;3494499;3494499;3494499;3494741;3494741;3494741;3494741;3496018;3496014;3496018;3496018;3496018;3496717;3496783;3496783;3496783;3497119;3497119;3497361;3497361;3497361;3497621;3498499…	-;-;-;-;-;-;-;-;-;-;-;-;-;-;-;-;-;-;-;-;-;-;-;-;-;-;-;-;-;-;-;-;-;-;-;-;-;-;-;-;-;-;-;-;-;-;-;-;-;-;-;-;-;-;-;-;-;-;-;-;-;-;-;-;-;-;-;-;-;-;-;-;-;-;-;-;-;-;-;-;-;-;-;-;-;-;-;-;-;-;-;-;-;-;-;-;-;-;-;-;-;-;-;-;-;-;-;-;-;-;-;-;-;-;-;-;-;-;-;-;-;-	9021	1080	161	221	576	343	1076	1072	536	1076	1822	1230	1134	606	1006	464	1449	317	1026	1798	799	807	795	662	374	156	1587	2092	1010	194	988	788	1154	2071	1108	494	1447	556	777	2057	1565	534	357	1080	448
ENSG00000207776.1	chr1	3560695	3560790	-	96	0	0	0	0	0	0	0	0	0	0	0	0	0	0	0	3	5	0	0	0	5	0	12	0	0	0	0	0	0	0	0	0	0	0	0	0	3	0	0	0	0	0	0	0
ENSG00000238260.1	chr1;chr1;chr1	3623190;3624308;3624632	3623556;3624450;3624743	-;-;-	622	11	36	6	2	5	6	10	82	9	23	6	11	3	3	39	86	37	0	1	61	102	0	102	4	48	5	11	36	17	7	0	1	5	12	17	12	59	4	8	30	8	23	12	25
ENSG00000158109.15	chr1;chr1;chr1;chr1;chr1;chr1;chr1;chr1;chr1	3625015;3625050;3625424;3625424;3625713;3627500;3627500;3628409;3628409	3625273;3625273;3625515;3625515;3625889;3627653;3627653;3630127;3630127	+;+;+;+;+;+;+;+;+	2401	226	125	45	121	365	371	306	181	292	250	344	355	104	442	465	219	57	269	91	205	172	172	118	95	376	241	272	223	212	232	226	290	289	191	156	250	116	148	238	374	288	252	285	203
ENSG00000116213.16	chr1;chr1;chr1;chr1;chr1;chr1;chr1;chr1;chr1;chr1;chr1;chr1;chr1;chr1;chr1;chr1;chr1;chr1;chr1;chr1;chr1;chr1;chr1;chr1;chr1;chr1;chr1;chr1;chr1;chr1;chr1;chr1;chr1;chr1;chr1;chr1;chr1;chr1;chr1;chr1;chr1;chr1;chr1;chr1;chr1;chr1;chr1;chr1;chr1;chr1;chr1;chr1;chr1;chr1;chr1;chr1;chr1;chr1;chr1;chr1	3630767;3630770;3631466;3631886;3632213;3632213;3632213;3632766;3633310;3633398;3633398;3633398;3634916;3634997;3634997;3634997;3634997;3634997;3635014;3635160;3635160;3635160;3635160;3635160;3635160;3635272;3635944;3635944;3635944;3635944;3635944;3636995;3636995;3636995;3636995;3636995;3636995;3638750;3638750;3638750;3638750;3638750;3638750;3646666;3646666;3646666;3646666;3646666;3647246;3647408…	3631657;3631117;3631657;3637098;3632338;3632338;3632338;3633503;3633503;3633503;3633503;3633503;3635074;3635074;3635074;3635074;3635074;3635074;3635074;3635294;3635450;3635433;3635294;3635294;3635294;3635294;3636030;3636030;3636030;3636030;3636030;3637098;3637098;3637057;3637098;3637098;3637098;3638822;3638822;3638822;3639625;3638822;3638822;3646782;3646782;3646782;3646782;3646782;3647560;3647560…	-;-;-;-;-;-;-;-;-;-;-;-;-;-;-;-;-;-;-;-;-;-;-;-;-;-;-;-;-;-;-;-;-;-;-;-;-;-;-;-;-;-;-;-;-;-;-;-;-;-;-;-;-;-;-;-;-;-;-;-	7634	247	71	55	162	203	416	267	312	424	161	246	154	53	262	305	157	206	140	41	175	434	205	447	65	218	195	171	249	157	163	298	186	216	299	150	177	328	137	210	207	170	189	159	194
ENSG00000078900.15	chr1;chr1;chr1;chr1;chr1;chr1;chr1;chr1;chr1;chr1;chr1;chr1;chr1;chr1;chr1;chr1;chr1;chr1;chr1;chr1;chr1;chr1;chr1;chr1;chr1;chr1;chr1;chr1;chr1;chr1;chr1;chr1;chr1;chr1;chr1;chr1;chr1;chr1;chr1;chr1;chr1;chr1;chr1;chr1;chr1;chr1;chr1;chr1;chr1;chr1;chr1;chr1;chr1;chr1;chr1;chr1;chr1;chr1;chr1;chr1;chr1;chr1;chr1;chr1;chr1;chr1;chr1;chr1;chr1;chr1;chr1;chr1;chr1;chr1;chr1;chr1;chr1;chr1;chr1;chr1…	3652516;3652520;3652565;3652565;3652565;3682333;3682333;3682333;3682333;3682333;3682366;3682366;3683060;3683060;3683060;3683060;3683060;3683060;3683060;3690672;3690672;3690672;3690707;3698046;3698058;3707549;3707549;3707549;3707549;3707549;3707549;3707549;3707549;3707549;3707549;3707549;3707549;3707549;3722021;3722021;3722021;3722021;3722021;3722021;3722021;3722021;3722021;3722021;3722021;3722021…	3652641;3652641;3652641;3652641;3652641;3682430;3682430;3682430;3682430;3682430;3682430;3682430;3683180;3683180;3683180;3683180;3683180;3683180;3683180;3690944;3690944;3690944;3690944;3698151;3698151;3707791;3708534;3707791;3707791;3707791;3707791;3707791;3707791;3707791;3707791;3707791;3707791;3707791;3722207;3722207;3722207;3722207;3722207;3722207;3722207;3722207;3722207;3722207;3722207;3722207…	+;+;+;+;+;+;+;+;+;+;+;+;+;+;+;+;+;+;+;+;+;+;+;+;+;+;+;+;+;+;+;+;+;+;+;+;+;+;+;+;+;+;+;+;+;+;+;+;+;+;+;+;+;+;+;+;+;+;+;+;+;+;+;+;+;+;+;+;+;+;+;+;+;+;+;+;+;+;+;+;+;+;+;+;+;+;+;+;+;+;+;+;+;+;+;+;+;+;+;+;+;+;+;+;+;+;+;+;+;+;+;+;+;+;+;+;+;+;+;+;+;+;+;+;+;+;+;+;+;+;+;+;+;+;+;+;+;+;+;+;+;+;+;+;+;+	6767	42	32	33	43	12	287	55	104	99	36	54	53	9	102	138	63	48	96	6	97	226	87	315	1	6	6	85	54	32	26	300	21	71	75	80	68	282	32	16	109	17	55	31	76
ENSG00000227589.1	chr1;chr1;chr1	3658938;3662153;3668625	3659430;3662265;3668772	-;-;-	754	0	0	0	7	15	10	2	29	2	0	0	0	0	5	3	39	3	18	0	7	37	0	36	0	54	0	1	0	2	2	21	0	16	1	6	0	22	3	7	0	6	5	0	2
ENSG00000235131.1	chr1;chr1	3712200;3714187	3712438;3714298	-;-	351	21	0	1	16	6	5	3	5	14	0	4	0	0	0	0	27	0	5	0	5	20	1	17	0	0	0	2	0	0	1	18	0	1	0	0	0	21	0	5	19	0	0	0	6
ENSG00000227372.12	chr1;chr1;chr1;chr1;chr1;chr1;chr1;chr1;chr1;chr1;chr1;chr1;chr1;chr1;chr1;chr1;chr1;chr1;chr1;chr1;chr1;chr1;chr1;chr1;chr1;chr1;chr1;chr1;chr1;chr1;chr1;chr1;chr1;chr1;chr1;chr1;chr1;chr1;chr1;chr1;chr1;chr1;chr1;chr1;chr1;chr1;chr1;chr1;chr1;chr1;chr1;chr1;chr1;chr1;chr1;chr1;chr1;chr1;chr1;chr1;chr1;chr1;chr1;chr1;chr1;chr1;chr1;chr1;chr1;chr1;chr1;chr1;chr1;chr1;chr1;chr1;chr1;chr1;chr1;chr1…	3735511;3735601;3735611;3735650;3735686;3735984;3736057;3736175;3736193;3736408;3736926;3736926;3736926;3736926;3736926;3737143;3737149;3737166;3737193;3737206;3737212;3737212;3737338;3737529;3737539;3737594;3737781;3738075;3738223;3738223;3738223;3738434;3738447;3739059;3739458;3739624;3739696;3739705;3739836;3739848;3739989;3740124;3740137;3740233;3740233;3740233;3740233;3740233;3740233;3740233…	3735542;3736588;3737854;3736558;3737854;3740387;3736558;3736558;3737854;3736758;3737296;3737103;3737103;3737103;3737103;3738513;3738513;3739407;3739335;3737854;3737854;3738513;3737854;3737854;3739551;3738513;3737875;3738513;3739227;3738513;3738513;3738513;3738513;3739216;3740387;3740387;3740387;3740387;3740387;3742957;3740387;3740387;3740387;3740387;3740387;3740387;3740387;3740387;3740387;3740387…	-;-;-;-;-;-;-;-;-;-;-;-;-;-;-;-;-;-;-;-;-;-;-;-;-;-;-;-;-;-;-;-;-;-;-;-;-;-;-;-;-;-;-;-;-;-;-;-;-;-;-;-;-;-;-;-;-;-;-;-;-;-;-;-;-;-;-;-;-;-;-;-;-;-;-;-;-;-;-;-;-;-;-;-;-;-;-;-;-;-;-;-;-;-;-;-;-;-;-;-;-;-;-;-;-;-;-;-;-;-;-;-;-;-;-;-;-;-;-;-;-;-;-;-;-;-;-;-;-;-;-;-;-;-;-;-;-;-;-;-;-;-	9701	699	217	216	590	370	496	529	353	813	308	576	809	162	856	810	511	256	491	225	394	486	379	358	158	789	512	399	611	433	440	679	355	434	643	431	488	359	493	385	855	531	413	465	310
ENSG00000276189.1	chr1	3736943	3737103	+	161	0	0	0	0	0	0	0	0	0	0	0	0	0	0	0	0	0	0	0	0	0	0	0	0	0	0	0	0	0	0	0	0	0	0	0	0	0	0	0	0	0	0	0	0
ENSG00000162592.10	chr1;chr1;chr1;chr1;chr1;chr1;chr1;chr1;chr1;chr1;chr1;chr1;chr1;chr1;chr1;chr1;chr1;chr1;chr1;chr1;chr1;chr1;chr1;chr1;chr1;chr1;chr1;chr1;chr1;chr1	3746460;3747814;3751332;3752445;3752450;3752475;3754118;3754118;3754118;3755457;3755457;3755457;3756733;3756752;3761281;3761281;3762620;3762620;3762967;3763108;3763706;3763706;3766535;3766535;3767233;3767233;3769783;3769783;3771401;3771401	3746691;3747958;3751457;3752799;3752799;3752799;3754241;3754241;3754241;3755567;3757189;3755567;3756890;3756890;3761430;3761430;3762712;3762712;3763474;3763474;3763836;3763836;3766612;3766612;3767445;3767445;3769887;3769887;3771645;3771645	+;+;+;+;+;+;+;+;+;+;+;+;+;+;+;+;+;+;+;+;+;+;+;+;+;+;+;+;+;+	4238	4	0	2	0	3	0	1	148	0	0	1	0	0	15	12	118	116	1	0	0	213	0	218	8	4	0	52	15	35	3	0	2	0	9	20	12	160	2	0	1	1	2	1	4
ENSG00000235169.11	chr1;chr1;chr1;chr1;chr1;chr1;chr1;chr1;chr1;chr1;chr1;chr1;chr1	3772749;3772771;3772787;3772825;3773063;3773063;3773063;3775299;3775299;3775299;3775299;3775795;3775795	3772788;3772788;3772841;3773181;3773181;3773181;3773181;3775483;3775670;3775388;3775483;3775982;3775956	+;+;+;+;+;+;+;+;+;+;+;+;+	993	23	0	9	16	45	16	14	78	61	4	103	48	8	29	152	115	28	15	15	17	76	35	103	2	0	38	32	7	12	14	62	3	22	9	13	9	107	22	8	80	29	28	28	41
ENSG00000130764.10	chr1;chr1;chr1;chr1;chr1;chr1;chr1;chr1;chr1;chr1;chr1;chr1;chr1;chr1;chr1;chr1	3778559;3781135;3781290;3781512;3781512;3781512;3782661;3782661;3782661;3783770;3783996;3783996;3783996;3785087;3786849;3795862	3781336;3781336;3781336;3781601;3781601;3781601;3782763;3782763;3782763;3783911;3784047;3784111;3784175;3785203;3787310;3796498	-;-;-;-;-;-;-;-;-;-;-;-;-;-;-;-	4509	325	246	122	290	465	589	486	254	371	362	898	495	67	495	532	434	117	289	276	405	326	472	251	128	432	434	378	456	279	310	477	323	574	267	236	370	201	369	300	609	274	364	365	348
ENSG00000266075.2	chr1	3782815	3783111	+	297	7	0	0	7	0	21	1	15	5	0	7	4	0	5	6	10	6	0	0	0	4	8	5	3	0	9	0	0	5	1	0	26	10	2	5	22	11	7	0	3	0	1	0	3
ENSG00000272153.1	chr1	3785008	3785538	+	531	32	3	32	3	21	29	28	20	30	37	50	30	0	10	94	27	14	14	8	37	40	71	33	4	56	3	2	11	3	6	34	19	42	62	2	16	13	3	9	26	16	30	13	29
ENSG00000116198.14	chr1;chr1;chr1;chr1;chr1;chr1;chr1;chr1;chr1;chr1;chr1;chr1;chr1;chr1;chr1;chr1;chr1;chr1;chr1;chr1;chr1;chr1;chr1;chr1;chr1;chr1;chr1;chr1;chr1;chr1;chr1;chr1;chr1;chr1;chr1;chr1;chr1;chr1;chr1;chr1;chr1;chr1;chr1;chr1;chr1;chr1;chr1;chr1;chr1;chr1;chr1;chr1;chr1;chr1;chr1;chr1;chr1;chr1;chr1;chr1;chr1;chr1;chr1;chr1;chr1;chr1;chr1;chr1;chr1;chr1;chr1;chr1;chr1;chr1;chr1;chr1;chr1;chr1;chr1;chr1…	3812086;3812086;3812086;3812086;3812086;3812086;3812086;3812086;3812086;3812086;3812086;3812086;3812086;3813031;3813031;3813031;3815239;3816149;3816280;3816280;3816280;3816280;3816280;3816280;3816280;3816280;3816280;3816280;3816280;3816280;3816280;3816280;3816280;3816280;3816280;3816323;3822776;3823174;3823174;3823174;3823174;3823174;3823174;3823174;3823174;3823174;3823174;3823174;3823174;3823174…	3815517;3815517;3815517;3815517;3815517;3815517;3815517;3815517;3815517;3815517;3815517;3815517;3815517;3815517;3815517;3815517;3815517;3816370;3816370;3816458;3816370;3816370;3816370;3816370;3816370;3816370;3816370;3816370;3816370;3816370;3816370;3816370;3816370;3816370;3816370;3816370;3823241;3823241;3823241;3823241;3823241;3823241;3823241;3823241;3823241;3823241;3823241;3823241;3823241;3823241…	-;-;-;-;-;-;-;-;-;-;-;-;-;-;-;-;-;-;-;-;-;-;-;-;-;-;-;-;-;-;-;-;-;-;-;-;-;-;-;-;-;-;-;-;-;-;-;-;-;-;-;-;-;-;-;-;-;-;-;-;-;-;-;-;-;-;-;-;-;-;-;-;-;-;-;-;-;-;-;-;-;-;-;-;-;-;-;-;-;-;-;-;-;-;-;-;-;-;-;-;-;-;-;-;-;-;-;-;-;-;-;-;-;-;-;-;-;-;-;-;-;-;-;-;-;-;-;-;-;-;-;-;-;-;-;-;-;-;-;-;-;-;-;-;-;-;-;-;-;-;-;-;-;-;-;-;-;-;-;-;-;-;-;-;-;-;-;-;-;-;-;-;-;-;-;-;-;-;-;-;-;-;-;-;-;-;-;-;-;-;-;-;-;-;-;-;-;-;-;-…	11885	764	311	202	481	1360	1185	939	692	758	380	1529	775	124	1278	861	627	370	534	559	712	759	850	519	218	1239	624	700	630	574	720	783	763	887	759	483	656	464	412	481	949	638	696	908	771
ENSG00000169598.17	chr1;chr1;chr1;chr1;chr1;chr1;chr1;chr1;chr1;chr1;chr1;chr1;chr1;chr1;chr1;chr1;chr1;chr1;chr1;chr1;chr1;chr1;chr1;chr1;chr1;chr1;chr1;chr1;chr1;chr1;chr1;chr1;chr1;chr1;chr1;chr1;chr1;chr1;chr1;chr1;chr1;chr1;chr1;chr1;chr1;chr1;chr1;chr1;chr1;chr1;chr1;chr1;chr1;chr1;chr1;chr1;chr1;chr1;chr1;chr1;chr1;chr1;chr1;chr1;chr1;chr1;chr1	3857267;3857267;3857281;3857460;3857473;3857473;3857476;3857517;3857600;3858718;3858718;3858718;3858718;3858718;3858718;3858718;3858718;3858718;3860420;3860420;3865643;3865762;3865762;3865812;3865812;3865812;3865812;3865812;3866284;3867663;3867974;3867974;3867974;3867974;3867974;3867974;3867974;3867974;3869605;3869605;3869605;3869605;3869605;3869605;3869605;3869605;3869605;3872472;3872472;3872472…	3857717;3857717;3857717;3857717;3857717;3857717;3857717;3857717;3857717;3858866;3858844;3858844;3858844;3858844;3858866;3858844;3858844;3858866;3860506;3860490;3866000;3866000;3866000;3866000;3866000;3866000;3866000;3866000;3866398;3868053;3868053;3868053;3868053;3868053;3868053;3868053;3868053;3868053;3869775;3869775;3869775;3869775;3869775;3869775;3869775;3869775;3869775;3872545;3872572;3872572…	+;+;+;+;+;+;+;+;+;+;+;+;+;+;+;+;+;+;+;+;+;+;+;+;+;+;+;+;+;+;+;+;+;+;+;+;+;+;+;+;+;+;+;+;+;+;+;+;+;+;+;+;+;+;+;+;+;+;+;+;+;+;+;+;+;+;+	3870	104	22	23	84	89	85	129	136	104	124	148	86	14	103	95	132	49	59	75	68	162	98	200	32	78	79	70	106	127	43	127	91	126	110	97	154	94	37	116	78	87	154	95	47
ENSG00000198912.11	chr1;chr1;chr1;chr1;chr1;chr1;chr1;chr1;chr1;chr1;chr1;chr1	3889125;3889125;3889133;3890569;3890569;3890569;3892883;3892883;3895295;3900172;3900172;3900172	3890073;3890073;3890073;3891057;3892996;3891057;3892996;3892996;3896183;3900272;3900293;3900247	-;-;-;-;-;-;-;-;-;-;-;-	4388	82	79	38	137	198	354	193	147	363	113	246	105	17	245	138	171	111	126	116	129	198	153	132	39	222	129	146	189	147	101	294	110	389	159	144	216	163	114	102	213	194	222	258	81
ENSG00000236423.6	chr1;chr1;chr1;chr1;chr1;chr1;chr1;chr1;chr1;chr1;chr1	3900352;3900372;3900404;3900416;3903965;3903965;3905231;3913692;3914395;3914395;3914395	3900631;3900631;3900631;3900631;3904036;3904036;3905532;3914290;3915447;3914652;3917225	+;+;+;+;+;+;+;+;+;+;+	4084	33	0	0	18	58	10	7	123	28	6	117	39	7	40	1	34	77	9	5	4	147	34	206	20	11	28	23	14	38	19	115	3	30	20	29	19	146	2	18	84	24	12	13	50
ENSG00000233304.7	chr1;chr1;chr1;chr1;chr1;chr1;chr1;chr1;chr1;chr1;chr1	3940486;3940565;3940617;3940994;3940994;3940994;3945188;3947756;3949027;3949027;3952253	3940698;3940698;3940698;3941143;3941143;3941143;3945462;3948321;3949866;3949866;3955262	+;+;+;+;+;+;+;+;+;+;+	5054	0	0	0	0	0	0	0	180	0	34	7	0	0	1	10	25	76	1	0	0	162	0	178	0	0	0	31	0	33	0	0	0	0	13	10	12	131	8	2	0	0	0	0	0
ENSG00000226374.3	chr1;chr1;chr1;chr1;chr1;chr1;chr1;chr1;chr1;chr1;chr1;chr1;chr1;chr1;chr1	3944547;3944561;3945494;3946320;3946320;3947144;3947144;3947275;3947957;3947957;3947957;3947957;3948863;3948863;3948863	3945141;3945141;3945669;3946463;3946463;3947328;3947328;3947328;3949024;3948595;3948595;3948595;3949024;3948900;3948900	-;-;-;-;-;-;-;-;-;-;-;-;-;-;-	2168	0	0	0	0	0	0	0	34	0	1	0	0	12	0	0	81	33	0	2	0	56	0	84	1	0	0	9	0	1	0	0	0	0	0	7	0	49	1	12	0	0	0	1	1
ENSG00000284668.2	chr1;chr1;chr1;chr1;chr1;chr1;chr1;chr1;chr1;chr1;chr1;chr1;chr1	3976133;3976140;3976140;3976882;3976882;3976882;3995642;3995785;3996807;3996824;3998056;3998056;4012231	3976195;3976195;3976195;3977157;3977157;3977102;3995691;3995830;3996932;3996932;3998855;3998058;4012704	+;+;+;+;+;+;+;+;+;+;+;+;+	1835	0	2	0	0	0	0	0	55	0	0	0	0	1	0	0	17	30	0	0	2	98	0	102	0	0	0	10	0	4	0	0	0	2	0	17	0	63	0	6	0	4	0	6	0
ENSG00000284703.1	chr1;chr1	4012921;4018478	4016706;4019508	-;-	4817	1	5	0	1	0	0	0	72	0	0	0	0	0	1	0	105	49	0	0	3	82	1	121	0	0	0	16	2	36	0	1	3	0	1	2	5	102	0	2	0	0	0	2	4
ENSG00000229280.1	chr1	4175528	4175899	-	372	0	0	0	0	0	0	0	12	0	0	0	0	0	0	0	6	10	0	0	0	44	0	7	0	0	0	6	0	8	0	0	0	0	0	6	0	5	0	0	0	0	0	0	0
ENSG00000235054.4	chr1;chr1;chr1;chr1;chr1;chr1;chr1;chr1;chr1;chr1;chr1;chr1;chr1;chr1;chr1;chr1;chr1;chr1;chr1;chr1;chr1;chr1;chr1;chr1;chr1;chr1;chr1;chr1;chr1;chr1;chr1;chr1;chr1;chr1;chr1;chr1;chr1;chr1;chr1;chr1;chr1;chr1;chr1;chr1;chr1;chr1;chr1;chr1;chr1;chr1;chr1;chr1;chr1;chr1;chr1;chr1;chr1;chr1;chr1;chr1;chr1;chr1	4412027;4412042;4412042;4412051;4412079;4412081;4412089;4412095;4412096;4412139;4412139;4415553;4415553;4415553;4415553;4415553;4415553;4415553;4415553;4415553;4415553;4415553;4415553;4416311;4416312;4416312;4416312;4416312;4416312;4416312;4416312;4416312;4416312;4416312;4416312;4416312;4416722;4416722;4417798;4417798;4417821;4422760;4422760;4422876;4422876;4422876;4423054;4423348;4423348;4423348…	4412349;4412349;4412349;4412632;4412349;4412632;4412632;4412632;4412349;4412349;4412349;4415587;4415587;4415587;4415587;4415587;4415587;4415587;4415587;4415587;4415587;4415587;4415587;4416548;4416548;4416548;4416548;4416548;4416548;4416548;4416548;4416548;4416548;4416548;4416548;4416548;4416881;4416881;4418106;4418107;4418106;4423187;4423187;4423187;4423187;4423187;4423187;4423448;4423448;4423448…	+;+;+;+;+;+;+;+;+;+;+;+;+;+;+;+;+;+;+;+;+;+;+;+;+;+;+;+;+;+;+;+;+;+;+;+;+;+;+;+;+;+;+;+;+;+;+;+;+;+;+;+;+;+;+;+;+;+;+;+;+;+	2574	0	0	0	0	0	0	0	110	0	0	0	0	0	0	3	20	21	0	0	0	111	1	151	3	0	0	12	0	15	0	0	0	11	0	6	0	87	0	0	0	0	0	0	0
ENSG00000284694.1	chr1;chr1	4479131;4484194	4482350;4484375	-;-	3402	0	0	0	0	0	0	0	66	0	1	0	0	0	0	0	15	50	5	1	0	112	0	80	0	9	0	24	1	3	2	0	0	0	0	8	0	35	0	0	0	0	0	0	1
ENSG00000227169.2	chr1;chr1	4551735;4552105	4552049;4552145	-;-	356	0	0	0	0	0	0	0	7	0	0	0	0	0	0	0	4	0	0	0	0	16	0	26	0	0	0	0	0	6	0	0	0	0	0	2	0	8	0	0	0	0	0	0	0
ENSG00000232596.3	chr1;chr1;chr1;chr1;chr1;chr1;chr1;chr1;chr1;chr1;chr1;chr1;chr1;chr1;chr1;chr1;chr1;chr1;chr1;chr1;chr1;chr1;chr1;chr1;chr1;chr1;chr1	4571481;4571489;4571499;4571504;4571504;4571513;4571516;4571548;4572470;4572470;4572470;4572470;4572470;4575322;4582277;4582277;4583083;4583083;4583339;4583342;4583897;4593052;4593052;4593052;4593052;4593052;4593700	4571629;4571629;4571629;4571629;4571629;4571629;4571629;4571629;4572592;4572592;4572592;4572592;4572592;4575450;4582574;4582574;4583178;4583178;4583421;4583708;4585094;4594016;4594009;4593190;4594009;4594016;4594009	+;+;+;+;+;+;+;+;+;+;+;+;+;+;+;+;+;+;+;+;+;+;+;+;+;+;+	3328	0	0	0	0	0	1	0	163	0	0	0	0	0	0	11	69	75	0	0	0	165	0	178	9	0	0	12	0	13	0	0	0	0	0	79	0	102	0	1	0	0	0	0	0
ENSG00000196581.11	chr1;chr1;chr1;chr1;chr1;chr1;chr1;chr1;chr1;chr1;chr1;chr1;chr1;chr1	4654609;4654732;4711155;4711900;4711900;4711900;4769853;4769853;4772280;4772280;4774427;4774427;4777401;4782545	4655454;4655454;4711186;4712165;4712699;4712699;4769940;4769940;4772525;4772525;4774558;4774558;4777794;4792534	+;+;+;+;+;+;+;+;+;+;+;+;+;+	12528	37	0	2	13	20	2	39	361	11	3	94	41	27	128	53	197	160	47	0	31	359	7	430	19	14	23	79	0	155	58	29	31	99	45	73	61	327	41	58	4	95	26	68	360
ENSG00000287586.1	chr1;chr1;chr1;chr1	4730211;4730272;4733536;4734798	4733030;4733030;4733745;4734992	-;-;-;-	3225	0	0	0	0	3	0	18	118	0	2	17	1	6	50	1	10	45	0	11	1	147	0	149	1	0	8	35	2	50	8	0	15	1	12	21	5	127	18	4	2	7	4	11	87
ENSG00000284739.1	chr1;chr1;chr1	4963954;4964418;4973107	4964089;4964553;4973298	-;-;-	464	0	0	0	0	0	0	0	42	0	9	0	0	0	0	0	16	14	0	0	0	44	0	71	0	0	0	0	0	0	0	0	0	0	0	12	0	36	0	0	0	0	0	0	0
ENSG00000284674.1	chr1;chr1;chr1;chr1;chr1	4973381;4974295;4974838;4976962;4980481	4973547;4974381;4974945;4977091;4981568	+;+;+;+;+	1580	0	0	0	0	0	0	0	96	0	0	0	0	27	0	2	50	83	0	0	0	48	0	130	0	0	0	12	0	58	0	0	0	0	1	27	0	28	0	4	0	0	0	0	0
ENSG00000231510.1	chr1;chr1;chr1;chr1	5086459;5088251;5090580;5090733	5086569;5088373;5090627;5090899	-;-;-;-	449	0	0	0	0	0	0	0	21	0	0	0	0	0	1	0	14	19	0	0	15	18	0	19	1	0	0	2	0	0	0	0	0	0	0	4	0	23	0	0	0	0	1	0	0
ENSG00000284616.1	chr1;chr1;chr1;chr1	5301928;5303328;5304401;5306942	5302004;5303393;5305029;5307394	-;-;-;-	1225	0	0	0	0	0	0	0	19	0	0	0	0	0	0	0	8	18	0	0	0	33	0	42	1	0	0	5	0	29	0	0	0	0	0	0	0	42	0	0	0	0	0	0	0
ENSG00000284692.2	chr1;chr1;chr1;chr1;chr1;chr1;chr1;chr1;chr1;chr1	5478736;5489795;5490829;5491144;5491144;5492488;5492488;5492755;5492755;5492755	5478841;5491581;5491050;5491581;5491581;5492607;5492607;5492804;5493057;5492889	-;-;-;-;-;-;-;-;-;-	2316	0	0	0	0	0	0	0	42	0	0	0	0	0	0	0	24	80	0	0	0	47	0	78	0	8	0	5	0	17	0	0	0	0	17	3	0	40	0	0	0	0	0	0	2
ENSG00000284666.1	chr1;chr1	5480787;5481956	5481322;5482028	-;-	609	0	0	0	0	0	0	0	28	0	0	0	0	0	0	0	4	16	0	0	0	7	0	20	0	0	0	0	0	5	0	0	0	0	0	0	0	8	0	0	0	0	0	0	0
ENSG00000260972.1	chr1	5492978	5494674	+	1697	0	0	0	0	0	0	0	46	0	0	0	0	0	0	4	12	35	0	0	0	82	0	113	0	0	0	11	0	1	0	0	0	2	0	8	0	79	0	0	0	0	0	2	0
ENSG00000283356.1	chr1	5554747	5554881	+	135	0	0	0	0	0	0	0	3	0	0	0	0	0	0	0	1	10	0	0	0	27	0	6	0	0	0	3	0	0	0	0	0	0	0	0	0	5	0	0	0	0	0	0	0
ENSG00000236948.2	chr1;chr1;chr1;chr1;chr1	5561709;5563170;5587368;5668141;5668141	5562254;5563355;5587575;5668295;5668255	-;-;-;-;-	1095	0	0	0	0	0	0	0	54	0	0	0	8	0	0	8	9	9	0	0	0	16	0	48	5	0	0	3	0	3	0	7	0	0	0	3	0	21	0	0	0	0	0	0	0
ENSG00000264341.1	chr1	5564071	5564143	+	73	0	0	0	0	0	0	0	0	0	0	0	0	0	0	0	0	0	0	0	0	0	0	6	0	0	0	0	0	0	0	0	0	0	0	0	0	0	0	0	0	0	0	0	0
ENSG00000264101.1	chr1	5862672	5862741	-	70	0	10	0	0	0	0	0	0	0	0	5	0	0	2	0	0	0	0	0	0	0	0	5	0	0	0	0	0	0	0	9	0	0	0	0	0	1	0	0	0	0	0	0	0
ENSG00000131697.18	chr1;chr1;chr1;chr1;chr1;chr1;chr1;chr1;chr1;chr1;chr1;chr1;chr1;chr1;chr1;chr1;chr1;chr1;chr1;chr1;chr1;chr1;chr1;chr1;chr1;chr1;chr1;chr1;chr1;chr1;chr1;chr1;chr1;chr1;chr1;chr1;chr1;chr1;chr1;chr1;chr1;chr1;chr1;chr1;chr1;chr1;chr1;chr1;chr1;chr1;chr1;chr1;chr1;chr1;chr1;chr1;chr1;chr1;chr1;chr1;chr1;chr1;chr1;chr1;chr1;chr1;chr1;chr1;chr1;chr1;chr1;chr1;chr1;chr1;chr1;chr1;chr1;chr1;chr1;chr1…	5862811;5862811;5862811;5862811;5862813;5863265;5863890;5863890;5863890;5863890;5864338;5864338;5864338;5864338;5864338;5865102;5865102;5865102;5865102;5866373;5866373;5866373;5866373;5867030;5867030;5867030;5867030;5867030;5867030;5867082;5867740;5867740;5867740;5867740;5867740;5867740;5873252;5873252;5873252;5873252;5873252;5874471;5874471;5874471;5874471;5874874;5874874;5874874;5874874;5874905…	5863405;5863405;5864033;5866458;5863405;5863405;5864033;5864033;5864033;5864033;5864517;5864517;5864517;5864517;5866458;5865273;5865273;5865273;5865273;5866458;5866458;5866458;5866458;5867115;5867115;5867115;5867115;5867115;5867652;5867115;5867896;5867896;5867896;5867896;5867896;5868375;5873841;5873335;5873335;5873335;5873335;5874657;5874657;5874657;5874657;5875100;5875100;5875100;5875100;5875100…	-;-;-;-;-;-;-;-;-;-;-;-;-;-;-;-;-;-;-;-;-;-;-;-;-;-;-;-;-;-;-;-;-;-;-;-;-;-;-;-;-;-;-;-;-;-;-;-;-;-;-;-;-;-;-;-;-;-;-;-;-;-;-;-;-;-;-;-;-;-;-;-;-;-;-;-;-;-;-;-;-;-;-;-;-;-;-;-;-;-;-;-;-;-;-;-;-;-;-;-;-;-;-;-;-;-;-;-;-;-;-;-;-;-;-;-;-;-;-;-;-;-;-;-;-;-;-;-;-;-;-;-;-;-;-;-;-;-;-;-;-;-;-;-;-;-;-;-;-;-;-;-;-;-;-	13167	452	83	126	282	398	595	313	550	363	351	506	513	111	591	312	503	313	226	230	136	751	389	873	137	480	353	381	240	242	274	333	237	464	363	287	355	742	238	257	470	348	376	373	251
ENSG00000069424.15	chr1;chr1;chr1;chr1;chr1;chr1;chr1;chr1;chr1;chr1;chr1;chr1;chr1;chr1;chr1;chr1;chr1;chr1;chr1;chr1;chr1;chr1;chr1;chr1;chr1;chr1;chr1;chr1;chr1;chr1;chr1;chr1;chr1;chr1;chr1;chr1;chr1;chr1;chr1;chr1;chr1;chr1;chr1;chr1;chr1;chr1;chr1;chr1;chr1;chr1;chr1;chr1;chr1;chr1;chr1;chr1;chr1;chr1;chr1;chr1;chr1;chr1;chr1;chr1;chr1;chr1;chr1;chr1;chr1;chr1;chr1;chr1;chr1;chr1;chr1;chr1;chr1;chr1;chr1;chr1…	5990927;5991320;5992262;5992639;5992666;5992671;5992671;5992675;5992685;5992693;5992703;5992706;5992711;5992711;5992714;5992723;5992731;5992753;5992760;5995863;5995863;5995863;6007439;6018635;6018635;6018635;6026013;6026163;6026272;6026275;6026276;6026294;6026320;6026327;6026334;6026345;6026345;6026347;6026361;6027297;6027356;6034283;6034677;6034980;6035090;6035917;6040517;6040517;6040517;6040517…	5991043;5991556;5992788;5992788;5992788;5992788;5992788;5992788;5992788;5992788;5992788;5992788;5992788;5992788;5992788;5992788;5992788;5992788;5992788;5996084;5996084;5996084;6007660;6018963;6018968;6018835;6026445;6026445;6026445;6026445;6026445;6026445;6026445;6026445;6026445;6026445;6026445;6026445;6026445;6027459;6027459;6034794;6034963;6035172;6035172;6036048;6040645;6040645;6040645;6040645…	+;+;+;+;+;+;+;+;+;+;+;+;+;+;+;+;+;+;+;+;+;+;+;+;+;+;+;+;+;+;+;+;+;+;+;+;+;+;+;+;+;+;+;+;+;+;+;+;+;+;+;+;+;+;+;+;+;+;+;+;+;+;+;+;+;+;+;+;+;+;+;+;+;+;+;+;+;+;+;+;+;+;+;+;+;+;+;+;+;+;+;+;+;+;+;+;+;+;+;+;+;+;+;+;+;+;+;+;+;+;+;+;+;+;+;+;+;+;+;+;+;+;+;+;+;+;+;+;+;+;+;+;+;+;+;+;+;+;+;+;+;+;+;+;+;+;+;+;+;+;+;+;+;+;+;+;+;+;+;+;+;+;+;+;+;+;+;+;+;+;+;+;+;+;+;+;+;+;+;+;+;+;+;+;+;+;+;+;+;+;+;+;+;+;+;+;+;+;+;+…	17329	597	182	123	489	196	870	565	576	331	267	242	526	142	279	450	403	362	505	449	804	1029	273	821	207	320	383	565	595	225	343	542	704	885	939	218	162	704	276	371	641	624	711	194	339
ENSG00000116254.18	chr1;chr1;chr1;chr1;chr1;chr1;chr1;chr1;chr1;chr1;chr1;chr1;chr1;chr1;chr1;chr1;chr1;chr1;chr1;chr1;chr1;chr1;chr1;chr1;chr1;chr1;chr1;chr1;chr1;chr1;chr1;chr1;chr1;chr1;chr1;chr1;chr1;chr1;chr1;chr1;chr1;chr1;chr1;chr1;chr1;chr1;chr1;chr1;chr1;chr1;chr1;chr1;chr1;chr1;chr1;chr1;chr1;chr1;chr1;chr1;chr1;chr1;chr1;chr1;chr1;chr1;chr1;chr1;chr1;chr1;chr1;chr1;chr1;chr1;chr1;chr1;chr1;chr1;chr1;chr1…	6101787;6105081;6105081;6105083;6105091;6106234;6106234;6106234;6106234;6106234;6106395;6106395;6106616;6106616;6106616;6106616;6106616;6109795;6109795;6109795;6109795;6110394;6110394;6110394;6110394;6111775;6111775;6111775;6111775;6112140;6112140;6112140;6112140;6112909;6112909;6112909;6112909;6113311;6121105;6121105;6121105;6121105;6121494;6121494;6121494;6121494;6123948;6123948;6123948;6124517…	6105427;6105427;6105427;6105427;6105427;6106287;6106287;6106287;6106287;6106287;6106509;6106509;6106779;6106779;6106779;6106772;6106779;6109990;6109990;6109990;6109990;6110526;6110526;6110526;6110526;6111883;6111883;6111883;6111883;6112277;6112277;6112277;6112277;6112998;6112998;6112998;6112998;6113416;6121237;6121237;6121237;6121237;6121573;6121573;6121573;6121573;6124107;6124107;6124107;6124661…	-;-;-;-;-;-;-;-;-;-;-;-;-;-;-;-;-;-;-;-;-;-;-;-;-;-;-;-;-;-;-;-;-;-;-;-;-;-;-;-;-;-;-;-;-;-;-;-;-;-;-;-;-;-;-;-;-;-;-;-;-;-;-;-;-;-;-;-;-;-;-;-;-;-;-;-;-;-;-;-;-;-;-;-;-;-;-;-;-;-;-;-;-;-;-;-;-;-;-;-;-;-;-;-;-;-;-;-;-;-;-;-;-;-;-;-;-;-;-;-;-;-;-;-;-;-;-;-;-;-;-;-;-;-;-;-;-	10094	29	0	26	8	6	24	3	385	2	36	4	15	12	52	136	114	230	53	16	35	535	3	737	7	8	17	51	10	52	10	1	21	0	5	50	36	551	1	6	6	3	8	14	13
ENSG00000285629.1	chr1;chr1;chr1;chr1;chr1	6159430;6168150;6181269;6192930;6197652	6159515;6168277;6181486;6193054;6197757	-;-;-;-;-	663	0	0	0	0	0	0	0	20	0	0	0	0	0	0	1	0	4	0	0	0	9	3	42	0	0	1	0	0	9	0	0	1	0	0	0	0	19	0	5	0	0	8	0	0
ENSG00000116251.11	chr1;chr1;chr1;chr1;chr1;chr1;chr1;chr1;chr1;chr1;chr1;chr1;chr1;chr1;chr1;chr1;chr1;chr1;chr1;chr1;chr1;chr1;chr1;chr1;chr1;chr1;chr1;chr1;chr1	6185020;6186575;6186615;6186692;6186723;6192927;6192930;6192930;6192930;6192930;6192930;6192930;6197652;6197652;6197652;6197652;6197652;6197652;6197652;6199370;6199562;6200489;6200489;6200489;6203367;6208681;6208681;6209135;6209135	6186816;6186816;6186816;6186816;6186816;6193054;6193054;6193054;6193054;6193054;6193054;6193054;6197756;6197756;6197756;6197756;6197756;6199563;6197756;6199553;6199595;6200750;6200727;6200842;6203494;6208739;6208739;6209389;6209244	-;-;-;-;-;-;-;-;-;-;-;-;-;-;-;-;-;-;-;-;-;-;-;-;-;-;-;-;-	4665	637	360	184	450	2479	1320	1290	247	935	280	928	645	109	1167	1614	379	235	664	945	634	494	763	185	190	2186	691	581	517	410	806	1282	741	991	777	370	908	290	410	555	1928	321	573	794	626
ENSG00000226944.1	chr1;chr1;chr1	6204840;6205206;6205754	6204982;6205413;6205780	-;-;-	378	16	10	13	0	12	0	6	9	2	0	43	6	5	6	13	73	41	0	1	1	24	1	45	1	0	1	2	1	4	2	19	1	0	0	0	0	52	1	0	12	2	3	6	2
ENSG00000158286.13	chr1;chr1;chr1;chr1;chr1;chr1;chr1;chr1;chr1;chr1;chr1;chr1;chr1;chr1;chr1;chr1;chr1;chr1;chr1;chr1;chr1;chr1;chr1;chr1;chr1;chr1;chr1;chr1;chr1;chr1;chr1;chr1;chr1;chr1;chr1;chr1;chr1;chr1;chr1;chr1;chr1;chr1;chr1;chr1;chr1;chr1;chr1;chr1;chr1;chr1;chr1;chr1;chr1;chr1	6205475;6206119;6206129;6206196;6206536;6206536;6206536;6207379;6207379;6207379;6208618;6208860;6208881;6209115;6209115;6209268;6209268;6209414;6209414;6209924;6209924;6209924;6210223;6210223;6210223;6210370;6210370;6210370;6210870;6210902;6210938;6211021;6211021;6211035;6211867;6211867;6211867;6211867;6211923;6212218;6212231;6212231;6212682;6212682;6212682;6212738;6213066;6213066;6218289;6218289…	6206101;6206302;6206302;6206302;6206726;6206726;6206726;6207564;6208307;6207511;6209025;6209025;6209025;6209196;6209196;6209539;6209343;6209539;6209539;6209970;6209970;6209970;6210295;6210295;6210295;6210438;6210900;6210438;6210938;6210938;6211118;6211118;6211118;6211118;6211916;6212053;6212053;6212053;6212053;6212416;6212416;6212416;6212836;6213183;6212733;6212903;6213183;6213183;6218369;6218369…	+;+;+;+;+;+;+;+;+;+;+;+;+;+;+;+;+;+;+;+;+;+;+;+;+;+;+;+;+;+;+;+;+;+;+;+;+;+;+;+;+;+;+;+;+;+;+;+;+;+;+;+;+;+	6595	515	96	103	244	708	414	405	288	548	287	1050	488	105	626	720	643	249	128	212	317	407	598	337	129	89	448	521	666	439	281	641	354	578	530	318	281	328	332	303	430	223	189	387	287
ENSG00000116237.16	chr1;chr1;chr1;chr1;chr1;chr1;chr1;chr1;chr1;chr1;chr1;chr1;chr1;chr1;chr1;chr1;chr1	6221193;6221898;6223438;6223491;6224599;6231902;6231902;6231902;6233474;6233474;6234405;6234886;6234886;6234886;6235717;6235717;6235717	6225262;6222160;6223502;6225262;6225262;6232119;6232119;6232119;6233643;6233643;6234511;6234974;6234974;6234974;6235972;6235972;6235964	-;-;-;-;-;-;-;-;-;-;-;-;-;-;-;-;-	4910	363	423	212	208	540	825	653	282	438	374	972	512	124	614	885	254	193	500	341	300	412	446	168	158	546	348	401	406	361	304	536	327	748	479	251	564	203	377	447	731	371	582	359	423
ENSG00000225077.3	chr1;chr1;chr1;chr1;chr1;chr1;chr1;chr1;chr1;chr1;chr1	6234692;6236240;6236966;6237245;6237245;6237470;6237771;6237814;6238221;6238221;6238221	6235063;6236336;6237150;6237345;6237345;6237848;6237848;6237848;6238940;6239444;6239408	+;+;+;+;+;+;+;+;+;+;+	2358	0	19	0	0	8	8	0	87	0	8	4	1	0	0	6	103	51	2	1	8	96	1	92	5	9	0	16	1	12	1	0	5	11	1	19	0	63	5	3	15	0	10	0	4
ENSG00000173673.8	chr1;chr1;chr1;chr1	6244179;6244351;6244548;6245110	6244241;6244446;6244629;6245578	+;+;+;+	710	0	0	0	0	0	0	0	17	0	3	0	0	0	0	0	1	9	3	0	0	7	0	32	0	0	0	9	2	13	0	0	0	0	5	0	0	52	0	2	0	0	0	0	0
ENSG00000158292.7	chr1;chr1;chr1;chr1;chr1;chr1	6247353;6250440;6251338;6253718;6254550;6260825	6250003;6250624;6251530;6254147;6255014;6261098	-;-;-;-;-;-	4198	84	60	63	115	42	76	203	149	87	443	57	246	105	98	59	168	104	44	56	102	253	161	207	47	10	134	314	170	49	222	30	148	218	145	75	72	174	166	139	126	76	75	139	34
ENSG00000097021.20	chr1;chr1;chr1;chr1;chr1;chr1;chr1;chr1;chr1;chr1;chr1;chr1;chr1;chr1;chr1;chr1;chr1;chr1;chr1;chr1;chr1;chr1;chr1;chr1;chr1;chr1;chr1;chr1;chr1;chr1;chr1;chr1;chr1;chr1;chr1;chr1;chr1;chr1;chr1;chr1;chr1;chr1;chr1;chr1;chr1;chr1;chr1;chr1;chr1;chr1;chr1;chr1;chr1;chr1;chr1;chr1;chr1;chr1;chr1;chr1;chr1;chr1;chr1;chr1;chr1;chr1;chr1;chr1;chr1;chr1;chr1;chr1;chr1;chr1;chr1;chr1;chr1;chr1;chr1;chr1…	6264269;6264272;6264273;6264273;6264273;6264273;6264273;6264273;6281102;6281102;6281102;6281102;6281102;6281102;6281102;6281102;6281130;6281253;6282724;6282724;6282724;6294864;6294864;6294864;6294864;6294864;6294864;6294864;6294864;6294864;6294864;6318492;6318492;6318492;6318492;6318492;6318492;6318492;6318492;6318492;6327299;6327299;6327299;6327299;6327299;6327299;6327299;6327299;6327299;6333477…	6264695;6264695;6264695;6264695;6264695;6264695;6264695;6264695;6281286;6281286;6281286;6281286;6281286;6281286;6281286;6281286;6281286;6281286;6282796;6282888;6282796;6295504;6294980;6294980;6294980;6294980;6294980;6294980;6294980;6294980;6294980;6318578;6318578;6318578;6318578;6318578;6318578;6318578;6318578;6318578;6327413;6327413;6327413;6327413;6327413;6327413;6327413;6327413;6327413;6333568…	-;-;-;-;-;-;-;-;-;-;-;-;-;-;-;-;-;-;-;-;-;-;-;-;-;-;-;-;-;-;-;-;-;-;-;-;-;-;-;-;-;-;-;-;-;-;-;-;-;-;-;-;-;-;-;-;-;-;-;-;-;-;-;-;-;-;-;-;-;-;-;-;-;-;-;-;-;-;-;-;-;-;-;-;-	3500	47	14	38	28	202	216	44	141	54	34	296	102	27	164	97	89	77	29	33	150	176	89	204	74	256	29	63	19	96	28	134	51	109	38	91	71	270	38	57	360	103	108	54	87
ENSG00000271746.1	chr1	6393555	6394391	+	837	0	1	0	0	0	0	5	38	16	0	8	0	0	19	3	15	2	0	0	0	32	0	58	0	0	0	18	7	1	0	2	1	0	0	3	1	34	1	1	0	0	3	1	0
ENSG00000069812.11	chr1;chr1;chr1;chr1;chr1;chr1;chr1;chr1;chr1;chr1;chr1;chr1;chr1;chr1;chr1;chr1;chr1;chr1;chr1	6412418;6413000;6413050;6415232;6416516;6418414;6418849;6419241;6419607;6419607;6419607;6419607;6419607;6419776;6419776;6419776;6419776;6419776;6424478	6413282;6413282;6413282;6419153;6416631;6419153;6419340;6419340;6419702;6419702;6419702;6419702;6419702;6419919;6419907;6419917;6419903;6419843;6424670	-;-;-;-;-;-;-;-;-;-;-;-;-;-;-;-;-;-;-	5407	15	1	1	13	0	4	3	102	3	7	1	28	15	2	3	56	39	0	113	27	123	21	170	10	20	10	42	6	18	8	3	1	39	10	34	1	115	7	8	26	13	9	1	3
ENSG00000187017.17	chr1;chr1;chr1;chr1;chr1;chr1;chr1;chr1;chr1;chr1;chr1;chr1;chr1;chr1;chr1;chr1;chr1;chr1;chr1;chr1;chr1;chr1;chr1;chr1;chr1;chr1;chr1;chr1;chr1;chr1;chr1;chr1;chr1;chr1;chr1;chr1;chr1;chr1;chr1;chr1;chr1;chr1;chr1;chr1;chr1;chr1;chr1;chr1;chr1;chr1;chr1;chr1;chr1;chr1;chr1;chr1;chr1;chr1;chr1;chr1;chr1;chr1;chr1;chr1;chr1;chr1;chr1;chr1;chr1;chr1;chr1;chr1;chr1;chr1;chr1;chr1;chr1;chr1;chr1;chr1…	6424776;6424788;6428226;6428226;6437300;6437568;6440254;6440254;6440254;6440254;6440378;6440626;6440626;6440626;6440626;6440659;6440934;6440934;6440934;6444481;6444481;6444481;6445664;6445664;6445664;6447331;6447351;6448043;6448043;6448467;6448520;6448641;6448641;6448641;6448641;6448641;6448641;6448641;6448641;6448893;6448893;6448893;6448893;6449055;6450374;6450444;6451317;6451603;6451603;6451603…	6425249;6425249;6428419;6428419;6437506;6437747;6440440;6440440;6440440;6440440;6440440;6440797;6440822;6440808;6440808;6440808;6441065;6441065;6441065;6444682;6444682;6444682;6445757;6445935;6445935;6447459;6447459;6448117;6448117;6448561;6448561;6448802;6448802;6448802;6449037;6448802;6448802;6449091;6449091;6448958;6449091;6449091;6449056;6449091;6450470;6450470;6451370;6451748;6451748;6451748…	+;+;+;+;+;+;+;+;+;+;+;+;+;+;+;+;+;+;+;+;+;+;+;+;+;+;+;+;+;+;+;+;+;+;+;+;+;+;+;+;+;+;+;+;+;+;+;+;+;+;+;+;+;+;+;+;+;+;+;+;+;+;+;+;+;+;+;+;+;+;+;+;+;+;+;+;+;+;+;+;+;+;+;+;+;+;+;+;+;+;+;+	6952	625	10	316	305	149	240	163	508	571	455	708	773	112	220	9	317	159	143	428	360	304	486	311	126	68	677	405	252	51	289	395	10	196	317	261	55	441	338	65	1515	47	6	43	451
ENSG00000265392.1	chr1	6429834	6429896	-	63	0	0	0	0	0	0	0	5	0	0	0	0	0	0	0	0	0	0	0	0	5	0	8	0	0	0	0	0	0	0	0	0	0	0	0	0	8	0	0	0	0	0	0	0
ENSG00000231868.1	chr1;chr1;chr1	6443034;6445562;6446912	6443169;6445681;6447006	-;-;-	351	37	0	6	4	42	0	3	14	5	26	41	37	0	18	0	24	0	0	22	5	17	15	8	4	0	46	31	1	0	7	30	1	5	1	19	16	15	6	0	62	0	0	0	9
ENSG00000215788.11	chr1;chr1;chr1;chr1;chr1;chr1;chr1;chr1;chr1;chr1;chr1;chr1;chr1;chr1;chr1;chr1;chr1;chr1;chr1;chr1;chr1;chr1;chr1;chr1;chr1;chr1;chr1;chr1;chr1;chr1;chr1;chr1;chr1;chr1;chr1;chr1;chr1;chr1;chr1;chr1;chr1;chr1;chr1;chr1;chr1;chr1;chr1;chr1;chr1;chr1;chr1;chr1;chr1;chr1;chr1;chr1;chr1;chr1;chr1;chr1;chr1;chr1;chr1;chr1;chr1;chr1;chr1;chr1;chr1;chr1;chr1;chr1;chr1;chr1;chr1;chr1;chr1;chr1;chr1;chr1…	6460786;6460786;6461151;6461151;6461151;6461151;6461151;6461204;6461434;6461434;6461434;6461434;6461434;6461434;6461480;6461756;6461994;6461994;6461994;6461994;6461994;6461994;6461994;6461994;6461994;6461994;6461994;6461994;6461994;6461994;6461994;6461994;6461994;6462319;6462629;6462629;6462629;6462629;6462629;6462629;6462629;6462629;6462629;6462629;6462629;6462629;6462629;6462629;6462629;6462637…	6461762;6461762;6461762;6461762;6461762;6461762;6461762;6461762;6461762;6461762;6461762;6461762;6461762;6461762;6461762;6461762;6462174;6462174;6462174;6462174;6462174;6462174;6462174;6462174;6462174;6462174;6462174;6462174;6462174;6462174;6462174;6462174;6462174;6462607;6462666;6462663;6462663;6462663;6462666;6462663;6462666;6462663;6462666;6462666;6462666;6462666;6462666;6462666;6462663;6462663…	-;-;-;-;-;-;-;-;-;-;-;-;-;-;-;-;-;-;-;-;-;-;-;-;-;-;-;-;-;-;-;-;-;-;-;-;-;-;-;-;-;-;-;-;-;-;-;-;-;-;-;-;-;-;-;-;-;-;-;-;-;-;-;-;-;-;-;-;-;-;-;-;-;-;-;-;-;-;-;-;-;-;-;-;-;-;-;-;-;-;-;-;-;-;-;-;-;-;-;-;-;-;-;-;-;-;-;-;-;-;-;-;-;-;-;-;-;-;-;-;-;-;-;-;-;-;-;-;-;-;-;-;-;-;-;-;-;-;-;-;-;-;-	4263	392	51	244	220	178	344	318	189	250	269	396	373	149	471	576	365	111	319	191	543	378	258	197	105	289	446	367	207	193	258	300	365	285	305	232	248	321	190	306	460	299	197	319	170
ENSG00000171680.23	chr1;chr1;chr1;chr1;chr1;chr1;chr1;chr1;chr1;chr1;chr1;chr1;chr1;chr1;chr1;chr1;chr1;chr1;chr1;chr1;chr1;chr1;chr1;chr1;chr1;chr1;chr1;chr1;chr1;chr1;chr1;chr1;chr1;chr1;chr1;chr1;chr1;chr1;chr1;chr1;chr1;chr1;chr1;chr1;chr1;chr1;chr1;chr1;chr1;chr1;chr1;chr1;chr1;chr1;chr1;chr1;chr1;chr1;chr1;chr1;chr1;chr1;chr1;chr1;chr1;chr1;chr1;chr1;chr1;chr1;chr1;chr1;chr1;chr1;chr1;chr1;chr1;chr1;chr1;chr1…	6467122;6467122;6467122;6467122;6467122;6467122;6467122;6467122;6467122;6467122;6467122;6467122;6467122;6467122;6467128;6467270;6467505;6467755;6467825;6467825;6467825;6467825;6467825;6467825;6467825;6467825;6467825;6467825;6467825;6467825;6467825;6467825;6467825;6467825;6467825;6468099;6469021;6469042;6469042;6469042;6469042;6469042;6469042;6469042;6469042;6469042;6469042;6469042;6469042;6469042…	6467572;6467572;6467572;6467572;6467572;6467572;6467572;6467572;6467572;6467572;6467572;6467572;6467572;6467572;6467572;6467572;6467572;6468586;6468586;6467893;6468586;6468586;6468586;6468586;6468586;6468586;6468586;6468586;6468586;6467898;6468586;6468586;6468586;6468586;6468586;6468586;6469241;6469163;6469241;6469241;6469241;6469241;6469241;6469241;6469241;6469241;6469241;6469241;6469241;6469241…	-;-;-;-;-;-;-;-;-;-;-;-;-;-;-;-;-;-;-;-;-;-;-;-;-;-;-;-;-;-;-;-;-;-;-;-;-;-;-;-;-;-;-;-;-;-;-;-;-;-;-;-;-;-;-;-;-;-;-;-;-;-;-;-;-;-;-;-;-;-;-;-;-;-;-;-;-;-;-;-;-;-;-;-;-;-;-;-;-;-;-;-;-;-;-;-;-;-;-;-;-;-;-;-;-;-;-;-;-;-;-;-;-;-;-;-;-;-;-;-;-;-;-;-;-;-;-;-;-;-;-;-;-;-;-;-;-;-;-;-;-;-;-;-;-;-;-;-;-;-;-;-;-;-;-;-;-;-;-;-;-;-;-;-;-;-;-;-;-;-;-;-;-;-;-;-;-;-;-;-;-;-;-;-;-;-;-;-;-;-;-;-;-;-;-;-;-;-;-;-…	6935	576	93	275	392	404	453	787	448	606	752	1225	638	284	689	412	1024	223	453	127	488	500	546	726	237	406	694	929	805	400	717	563	822	688	585	321	454	511	285	757	365	434	83	734	544
ENSG00000162408.11	chr1;chr1;chr1;chr1;chr1;chr1;chr1;chr1;chr1;chr1;chr1;chr1;chr1;chr1;chr1;chr1;chr1;chr1;chr1;chr1;chr1;chr1;chr1	6521347;6526696;6528994;6531968;6531995;6532229;6532463;6532463;6533280;6533280;6533280;6541830;6541830;6544826;6544826;6545045;6549256;6549362;6549571;6550396;6550396;6554107;6554107	6526003;6526829;6529171;6532079;6532079;6532760;6532760;6532760;6533441;6533385;6533441;6541927;6541927;6545017;6544922;6545180;6549698;6549698;6549698;6550488;6550615;6554500;6554513	-;-;-;-;-;-;-;-;-;-;-;-;-;-;-;-;-;-;-;-;-;-;-	7271	425	308	166	368	746	543	731	475	553	378	751	450	131	861	601	352	288	468	341	422	531	470	361	139	1007	371	467	619	605	570	445	494	668	530	341	591	347	304	505	633	438	372	648	401
ENSG00000253022.1	chr1	6540854	6540964	+	111	0	0	0	0	0	0	1	0	1	6	0	4	0	0	0	0	5	0	0	0	4	0	1	0	0	0	0	0	0	0	1	1	0	0	0	0	0	0	0	0	0	0	0	4
ENSG00000229519.2	chr1;chr1	6547905;6548448	6548133;6548619	+;+	401	6	30	14	3	38	11	12	41	7	6	8	46	3	10	24	22	21	0	14	1	28	19	30	3	6	2	3	4	12	15	11	43	23	9	4	12	7	11	7	15	5	3	19	2
ENSG00000173662.21	chr1;chr1;chr1;chr1;chr1;chr1;chr1;chr1;chr1;chr1;chr1;chr1;chr1;chr1;chr1;chr1;chr1;chr1	6555307;6555309;6570909;6570909;6570941;6570941;6574631;6574631;6576415;6576415;6576415;6576950;6576950;6576950;6578653;6578653;6578653;6579296	6555564;6555564;6571215;6571215;6571215;6571215;6575392;6575392;6576627;6576627;6576627;6577070;6577070;6577070;6579426;6579626;6579755;6579426	+;+;+;+;+;+;+;+;+;+;+;+;+;+;+;+;+;+	2764	38	17	0	9	24	6	0	59	6	9	2	2	3	0	0	32	61	4	0	13	102	0	164	0	3	0	7	0	12	11	18	14	1	60	3	2	58	16	36	1	5	0	4	3
ENSG00000204859.13	chr1;chr1;chr1;chr1;chr1;chr1;chr1;chr1;chr1;chr1;chr1;chr1;chr1;chr1;chr1;chr1;chr1;chr1;chr1;chr1;chr1;chr1;chr1;chr1;chr1;chr1;chr1;chr1;chr1;chr1;chr1;chr1;chr1;chr1;chr1;chr1;chr1;chr1;chr1;chr1;chr1;chr1	6579994;6580001;6580017;6580088;6580541;6580541;6580541;6582058;6582058;6582058;6582058;6585302;6585919;6585919;6586207;6586695;6586695;6587205;6587205;6587205;6587256;6587478;6587478;6587478;6587478;6587515;6588060;6588060;6588060;6588060;6588060;6588278;6588278;6588278;6588687;6588756;6588756;6588756;6588916;6588916;6588916;6588916	6580136;6580049;6580070;6580136;6581299;6581299;6581299;6582245;6582299;6582299;6582299;6586787;6586030;6586030;6587291;6586787;6586787;6587291;6587291;6587291;6587291;6587632;6587632;6587632;6587632;6587632;6589280;6588196;6588105;6588196;6588196;6588442;6588442;6588442;6588844;6588844;6588844;6588844;6589160;6589280;6589280;6589280	+;+;+;+;+;+;+;+;+;+;+;+;+;+;+;+;+;+;+;+;+;+;+;+;+;+;+;+;+;+;+;+;+;+;+;+;+;+;+;+;+;+	4510	348	95	74	209	249	409	387	198	398	333	418	301	131	507	199	457	150	231	166	236	274	278	254	71	269	287	374	456	376	216	187	233	284	389	174	314	206	253	178	386	318	241	434	220
ENSG00000162413.16	chr1;chr1;chr1;chr1;chr1;chr1;chr1;chr1;chr1;chr1;chr1;chr1;chr1;chr1;chr1;chr1;chr1;chr1;chr1;chr1;chr1	6590724;6590724;6593193;6593205;6593381;6594081;6595485;6595485;6595485;6595485;6599047;6599047;6599047;6599047;6599047;6599750;6601797;6601797;6603454;6614450;6614450	6595557;6593658;6593658;6594918;6593658;6594110;6595557;6595557;6595557;6595557;6599452;6599452;6599452;6599452;6599452;6599816;6603001;6602869;6603684;6614607;6614560	-;-;-;-;-;-;-;-;-;-;-;-;-;-;-;-;-;-;-;-;-	6901	393	257	115	262	793	355	470	327	284	480	853	333	254	764	302	513	204	328	238	359	436	344	405	138	441	279	608	494	658	476	303	428	530	476	337	219	355	387	454	238	471	244	342	264
ENSG00000116273.6	chr1;chr1;chr1;chr1;chr1;chr1	6613731;6613762;6616757;6619803;6621411;6622192	6614105;6614105;6616858;6620337;6624030;6622645	+;+;+;+;+;+	3632	170	83	51	152	412	343	264	205	219	200	311	182	74	425	240	161	213	271	108	122	284	266	225	69	429	161	318	212	266	269	222	279	267	187	157	153	159	120	101	298	166	190	278	142
ENSG00000041988.15	chr1;chr1;chr1;chr1;chr1;chr1;chr1;chr1;chr1;chr1;chr1;chr1;chr1;chr1;chr1;chr1;chr1;chr1;chr1;chr1;chr1;chr1;chr1;chr1;chr1;chr1;chr1;chr1;chr1;chr1;chr1;chr1;chr1;chr1	6624866;6625150;6625171;6625181;6625192;6625198;6625225;6625230;6627763;6628395;6628499;6628499;6628499;6628499;6628499;6629643;6630288;6630288;6630288;6630288;6630288;6630288;6630291;6632370;6632391;6632391;6632391;6632391;6632391;6632796;6632796;6632796;6632796;6634020	6624954;6625292;6625292;6625292;6625292;6625292;6625292;6625292;6628519;6628691;6628691;6628691;6628691;6628691;6628691;6629724;6630326;6630353;6630353;6630353;6630353;6630353;6630353;6632495;6633051;6632495;6632495;6632495;6632495;6633121;6633273;6633368;6633565;6635586	+;+;+;+;+;+;+;+;+;+;+;+;+;+;+;+;+;+;+;+;+;+;+;+;+;+;+;+;+;+;+;+;+;+	4072	122	26	32	58	130	135	101	153	86	165	157	109	35	85	125	169	41	70	125	127	183	103	278	27	50	184	94	96	134	115	207	72	75	39	34	101	202	83	76	100	47	80	114	102
ENSG00000007923.16	chr1;chr1;chr1;chr1;chr1;chr1;chr1;chr1;chr1;chr1;chr1;chr1;chr1;chr1;chr1;chr1;chr1;chr1;chr1;chr1;chr1;chr1;chr1;chr1;chr1;chr1;chr1;chr1;chr1;chr1;chr1;chr1;chr1;chr1;chr1;chr1;chr1;chr1;chr1;chr1;chr1;chr1;chr1;chr1;chr1;chr1;chr1;chr1;chr1;chr1;chr1;chr1;chr1;chr1;chr1;chr1;chr1;chr1;chr1;chr1;chr1;chr1;chr1;chr1;chr1;chr1;chr1;chr1;chr1;chr1;chr1;chr1;chr1;chr1;chr1;chr1;chr1;chr1;chr1;chr1…	6634168;6634168;6634170;6635113;6636117;6636117;6636117;6637198;6637198;6637198;6637301;6637447;6637447;6637447;6637447;6638083;6638295;6638295;6639902;6639902;6639902;6644558;6644558;6644558;6644558;6645041;6645041;6645041;6645041;6645789;6645789;6645800;6645871;6645876;6651017;6651529;6651529;6651529;6651529;6652829;6652829;6652829;6652829;6652829;6652914;6653809;6653911;6653911;6653911;6653911…	6634784;6635700;6635700;6635700;6636246;6636246;6636246;6637340;6637340;6637340;6637340;6637504;6637504;6637504;6638364;6638364;6638364;6638364;6640057;6640057;6640057;6644674;6644674;6644674;6644674;6645126;6645112;6645126;6645057;6645978;6645978;6645978;6645978;6645978;6651180;6651602;6651602;6651602;6651602;6652951;6652951;6652951;6652951;6652951;6652951;6654039;6654039;6654039;6654039;6654039…	-;-;-;-;-;-;-;-;-;-;-;-;-;-;-;-;-;-;-;-;-;-;-;-;-;-;-;-;-;-;-;-;-;-;-;-;-;-;-;-;-;-;-;-;-;-;-;-;-;-;-;-;-;-;-;-;-;-;-;-;-;-;-;-;-;-;-;-;-;-;-;-;-;-;-;-;-;-;-;-;-;-;-;-;-	5083	413	92	122	238	453	533	454	337	363	177	616	400	79	336	439	403	216	340	388	400	466	359	304	95	673	386	326	323	211	383	316	371	569	397	199	460	245	174	261	553	286	468	513	338
ENSG00000228750.7	chr1;chr1;chr1;chr1;chr1;chr1;chr1;chr1;chr1;chr1;chr1;chr1;chr1;chr1	6724637;6724637;6724643;6724670;6724673;6724673;6725937;6727081;6727433;6727433;6729720;6729720;6729720;6729720	6724850;6724850;6724850;6724850;6724855;6724855;6727408;6727444;6727612;6727612;6729993;6729993;6730012;6730012	+;+;+;+;+;+;+;+;+;+;+;+;+;+	2188	0	0	0	0	0	0	0	106	0	1	0	0	0	0	0	36	46	10	0	0	62	0	83	0	0	0	3	9	2	0	0	0	0	8	15	0	65	1	2	0	0	0	0	2
ENSG00000284744.1	chr1;chr1;chr1	6767954;6769727;6769911	6768762;6769776;6770038	+;+;+	987	0	1	0	1	0	0	0	54	0	0	0	0	0	0	0	27	18	0	0	0	32	0	45	0	0	0	2	0	15	0	0	0	0	1	2	0	26	1	0	0	0	2	1	0
ENSG00000237436.1	chr1;chr1;chr1	6783892;6784149;6784658	6784045;6784223;6784843	-;-;-	415	0	20	2	0	18	12	0	2	0	0	5	0	5	0	2	42	0	2	0	0	30	0	21	0	7	1	0	0	35	1	19	0	0	0	8	0	11	0	0	0	1	9	0	21
ENSG00000171735.19	chr1;chr1;chr1;chr1;chr1;chr1;chr1;chr1;chr1;chr1;chr1;chr1;chr1;chr1;chr1;chr1;chr1;chr1;chr1;chr1;chr1;chr1;chr1;chr1;chr1;chr1;chr1;chr1;chr1;chr1;chr1;chr1;chr1;chr1;chr1;chr1;chr1;chr1;chr1;chr1;chr1;chr1;chr1;chr1;chr1;chr1;chr1;chr1;chr1;chr1;chr1;chr1;chr1;chr1;chr1;chr1;chr1;chr1;chr1;chr1;chr1;chr1;chr1;chr1;chr1;chr1;chr1;chr1;chr1;chr1;chr1;chr1;chr1;chr1;chr1;chr1;chr1;chr1;chr1;chr1…	6785454;6785454;6785464;6785480;6785491;6785518;6785552;6806983;6806988;6820181;6820181;6820181;6820181;6820181;6825092;6825092;6825092;6825092;6825092;6825092;6825092;6825092;6825110;6853048;6853052;6853095;6871757;6871757;6871757;6871757;6871757;6871757;6871757;6871757;6871757;6874056;6886240;6886240;6886240;6887654;6887654;6887654;6887654;6887654;6887654;6887654;7091304;7249491;7467830;7640400…	6785575;6785575;6785575;6785575;6785575;6785575;6785575;6807088;6807088;6820250;6820250;6820250;6820250;6820250;6825210;6825210;6825210;6825210;6825210;6825210;6825210;6825210;6825210;6853189;6853189;6853189;6871840;6871840;6872045;6871858;6872019;6871840;6872038;6871840;6872053;6874423;6886346;6886346;6886346;6887842;6888193;6888150;6888188;6887787;6887865;6888201;7091371;7249626;7467901;7640553…	+;+;+;+;+;+;+;+;+;+;+;+;+;+;+;+;+;+;+;+;+;+;+;+;+;+;+;+;+;+;+;+;+;+;+;+;+;+;+;+;+;+;+;+;+;+;+;+;+;+;+;+;+;+;+;+;+;+;+;+;+;+;+;+;+;+;+;+;+;+;+;+;+;+;+;+;+;+;+;+;+;+;+;+;+;+;+;+;+	9903	228	126	188	246	300	688	399	505	376	142	407	523	102	661	745	254	196	162	225	301	509	200	623	100	1143	304	306	282	465	323	217	251	317	362	245	351	489	212	172	429	233	468	301	157
ENSG00000227950.1	chr1	6834333	6834618	-	286	1	19	7	4	0	1	24	23	0	0	3	5	0	36	31	7	2	1	2	5	5	9	6	0	0	0	5	5	7	30	1	1	8	1	6	1	9	0	0	0	7	12	0	6
ENSG00000237365.1	chr1;chr1	7008376;7014251	7008695;7014279	-;-	349	0	0	0	0	0	0	0	3	0	0	0	0	0	0	0	0	22	0	0	0	4	0	29	0	0	0	0	0	0	0	0	0	1	0	3	1	7	0	0	14	0	2	0	0
ENSG00000207056.1	chr1	7219360	7219524	+	165	0	2	1	7	0	0	0	35	0	2	2	3	1	1	1	0	4	2	0	4	6	0	18	3	7	3	1	2	0	1	0	0	0	1	18	5	5	1	1	3	2	0	1	2
ENSG00000237402.1	chr1;chr1	7368942;7370081	7369116;7370270	+;+	365	15	0	0	1	0	0	0	13	0	0	2	42	0	2	2	11	0	3	0	2	42	0	31	0	0	0	8	0	0	0	0	0	0	0	0	0	19	0	3	27	0	0	1	0
ENSG00000237728.2	chr1;chr1;chr1;chr1;chr1	7382487;7388183;7389340;7389340;7389659	7382723;7388493;7389419;7389439;7389754	-;-;-;-;-	744	0	0	0	1	0	0	0	93	0	0	0	0	0	56	2	46	44	0	1	0	99	0	111	2	0	0	1	0	49	1	6	0	0	0	0	0	110	2	0	0	0	14	0	17
ENSG00000225126.1	chr1;chr1	7441096;7441280	7441181;7441554	-;-	361	0	0	0	0	0	3	0	16	0	0	0	0	4	4	0	0	0	0	0	13	30	4	27	0	0	0	2	0	7	0	0	1	0	1	2	0	7	0	0	1	0	0	1	2
ENSG00000270171.1	chr1	7693124	7694844	-	1721	1	0	2	20	1	14	2	111	21	28	5	4	23	11	57	17	53	1	0	0	122	0	119	0	30	4	42	8	24	15	25	2	1	0	4	0	68	7	10	49	0	3	22	4
ENSG00000270035.1	chr1	7698303	7698872	-	570	0	0	1	5	2	24	0	10	0	0	3	0	0	3	11	9	0	0	0	0	33	0	12	12	16	4	2	26	11	0	0	0	0	0	0	0	24	1	0	15	0	1	8	0
ENSG00000269978.1	chr1	7700704	7700970	-	267	0	0	6	1	0	0	4	6	4	4	1	19	0	1	10	24	2	0	0	0	20	2	8	0	27	30	1	1	7	1	3	0	6	0	5	6	6	1	0	1	0	10	25	0
ENSG00000049245.13	chr1;chr1;chr1;chr1;chr1;chr1;chr1;chr1;chr1;chr1;chr1;chr1	7771296;7772707;7773442;7773442;7777097;7777160;7777160;7778118;7778118;7778118;7779626;7779626	7771385;7773198;7773511;7773511;7777318;7777318;7777318;7778169;7778169;7778169;7779806;7781432	+;+;+;+;+;+;+;+;+;+;+;+	2733	356	323	223	498	592	779	773	213	529	295	574	744	142	740	849	179	147	364	266	356	202	494	96	237	907	450	474	463	500	510	321	592	719	470	193	473	201	335	445	539	455	476	389	426
ENSG00000269925.1	chr1	7776383	7776775	+	393	28	0	8	18	0	3	3	88	4	1	21	0	1	8	12	62	18	0	0	8	44	7	71	0	11	12	13	3	21	1	20	0	0	4	0	6	16	4	10	4	7	1	19	0
ENSG00000049246.14	chr1;chr1;chr1;chr1;chr1;chr1;chr1;chr1;chr1;chr1;chr1;chr1;chr1;chr1;chr1;chr1;chr1;chr1;chr1;chr1;chr1;chr1;chr1;chr1;chr1;chr1;chr1;chr1;chr1;chr1;chr1;chr1;chr1;chr1;chr1;chr1;chr1;chr1;chr1;chr1;chr1;chr1;chr1;chr1;chr1;chr1;chr1;chr1;chr1;chr1;chr1;chr1;chr1;chr1;chr1;chr1;chr1;chr1;chr1;chr1;chr1;chr1;chr1;chr1;chr1;chr1;chr1;chr1;chr1;chr1;chr1;chr1;chr1;chr1;chr1;chr1;chr1;chr1;chr1;chr1…	7784320;7784429;7784429;7784654;7784654;7784654;7784654;7784703;7785441;7785441;7785441;7785441;7785441;7785523;7786721;7786721;7786721;7786721;7786721;7786721;7787198;7787322;7788045;7788045;7788045;7788045;7788045;7788045;7793957;7793957;7793957;7793960;7793960;7798525;7798525;7798525;7798525;7798525;7801113;7801113;7801113;7801113;7801113;7803047;7803047;7803047;7803047;7803047;7803051;7803692…	7784376;7784468;7784468;7785005;7785005;7785005;7785005;7785005;7785586;7785586;7785586;7785586;7785586;7785586;7786836;7786836;7786836;7786836;7786836;7786836;7787246;7788570;7788338;7788246;7788246;7788246;7788246;7788246;7794008;7794008;7794008;7794008;7794008;7798673;7798673;7798673;7798673;7798673;7801191;7801191;7801191;7801191;7801191;7803153;7803153;7803153;7803153;7803153;7803153;7803848…	+;+;+;+;+;+;+;+;+;+;+;+;+;+;+;+;+;+;+;+;+;+;+;+;+;+;+;+;+;+;+;+;+;+;+;+;+;+;+;+;+;+;+;+;+;+;+;+;+;+;+;+;+;+;+;+;+;+;+;+;+;+;+;+;+;+;+;+;+;+;+;+;+;+;+;+;+;+;+;+;+;+;+;+;+;+;+;+;+;+;+;+;+;+;+;+;+;+;+;+;+;+;+;+;+;+;+	8099	731	112	306	806	586	1270	2017	437	1748	1308	782	903	344	1608	1405	1397	283	1098	338	345	591	794	412	198	309	1739	2080	1737	1079	1100	647	1067	984	920	844	1126	482	729	1798	888	859	658	977	589
ENSG00000236266.1	chr1;chr1;chr1	7810242;7811489;7827104	7810716;7811604;7827342	-;-;-	830	65	1	4	47	9	72	50	24	74	1	70	83	1	94	145	16	12	16	14	10	16	38	16	2	0	47	68	130	103	26	54	59	18	18	53	99	22	13	68	79	55	59	19	34
ENSG00000049247.14	chr1;chr1;chr1;chr1;chr1;chr1;chr1;chr1;chr1;chr1;chr1;chr1;chr1;chr1;chr1;chr1	7843083;7846692;7847612;7847766;7847804;7849640;7849640;7849640;7850812;7850812;7850812;7852901;7852901;7852901;7853307;7853307	7843950;7846766;7847882;7847882;7847882;7849683;7849683;7849683;7850922;7850922;7850922;7852923;7853065;7853118;7853431;7853512	-;-;-;-;-;-;-;-;-;-;-;-;-;-;-;-	1793	0	0	0	3	0	2	1	72	1	0	1	3	0	0	15	40	9	7	0	0	82	7	106	1	0	0	6	2	6	0	0	0	2	0	10	0	66	3	0	0	0	0	1	0
ENSG00000049249.9	chr1;chr1;chr1;chr1;chr1;chr1;chr1;chr1;chr1;chr1;chr1;chr1;chr1;chr1;chr1;chr1;chr1;chr1;chr1;chr1;chr1;chr1;chr1;chr1;chr1;chr1;chr1;chr1;chr1;chr1	7915871;7915894;7921800;7933127;7933162;7933162;7933162;7935013;7935013;7935013;7935013;7936460;7937690;7937690;7937690;7938193;7938193;7938193;7938193;7938721;7938721;7938721;7939895;7939895;7939895;7940784;7940784;7940784;7943139;7943139	7920923;7920923;7922021;7933296;7933296;7933296;7933296;7935143;7935100;7935143;7935143;7936563;7937756;7937756;7937756;7938330;7938304;7938330;7938330;7938828;7938828;7938828;7940078;7940078;7940078;7940933;7940933;7940839;7943165;7943165	-;-;-;-;-;-;-;-;-;-;-;-;-;-;-;-;-;-;-;-;-;-;-;-;-;-;-;-;-;-	6354	5	4	24	56	34	142	45	123	20	21	21	39	1	16	70	163	98	48	14	106	183	28	196	20	138	23	79	3	96	43	29	31	108	70	77	13	95	53	21	19	36	138	6	16
ENSG00000270330.1	chr1	7942372	7942726	+	355	0	0	0	0	0	5	0	7	0	0	0	0	0	0	0	27	0	0	0	0	5	0	27	0	0	4	3	0	0	0	0	0	0	0	0	0	18	0	0	0	0	0	0	0
ENSG00000116288.13	chr1;chr1;chr1;chr1;chr1;chr1;chr1;chr1;chr1;chr1;chr1;chr1;chr1;chr1;chr1;chr1;chr1;chr1;chr1;chr1;chr1;chr1;chr1;chr1;chr1;chr1;chr1;chr1;chr1;chr1;chr1;chr1;chr1;chr1;chr1;chr1;chr1;chr1;chr1;chr1;chr1;chr1;chr1;chr1;chr1;chr1;chr1;chr1;chr1;chr1;chr1;chr1;chr1;chr1;chr1;chr1;chr1;chr1;chr1;chr1;chr1;chr1	7954291;7961663;7961692;7961701;7961711;7961748;7961894;7961969;7962763;7962763;7962763;7962763;7962763;7962763;7962763;7962763;7962767;7965324;7965324;7965324;7965324;7965324;7965324;7965324;7965324;7965324;7965351;7969085;7969345;7969345;7969345;7969345;7969345;7969345;7969345;7969345;7969345;7970894;7970894;7970894;7970894;7970894;7970894;7970894;7970894;7970894;7970894;7971629;7977652;7977652…	7954323;7961735;7961735;7961735;7961793;7961793;7962081;7962101;7962875;7962875;7962875;7962875;7962875;7962875;7962875;7962875;7962875;7965425;7965425;7965425;7965425;7965425;7965425;7965425;7965425;7965425;7965425;7969148;7969404;7969404;7969404;7969404;7969404;7969404;7969404;7969404;7969404;7970963;7970963;7970963;7971521;7970963;7970963;7970963;7970963;7971048;7970963;7971957;7977738;7977738…	+;+;+;+;+;+;+;+;+;+;+;+;+;+;+;+;+;+;+;+;+;+;+;+;+;+;+;+;+;+;+;+;+;+;+;+;+;+;+;+;+;+;+;+;+;+;+;+;+;+;+;+;+;+;+;+;+;+;+;+;+;+	2397	547	348	327	365	1868	1560	1023	169	661	314	1641	554	117	1082	719	298	92	449	404	568	353	705	148	173	1056	500	471	670	659	604	803	523	891	560	272	685	179	424	502	1008	571	665	594	671
ENSG00000200344.1	chr1	7982881	7982983	-	103	18	0	0	12	23	0	0	7	1	77	3	47	10	8	13	0	0	14	4	0	0	4	5	0	2	5	1	0	3	17	30	8	6	38	0	5	5	3	2	4	1	0	2	13
ENSG00000284747.1	chr1;chr1;chr1;chr1;chr1;chr1;chr1;chr1	7991134;7994547;7996321;7999540;8000088;8000606;8001915;8003988	7991447;7994664;7996443;8000728;8000185;8000728;8002961;8005312	+;+;+;+;+;+;+;+	4116	63	15	36	12	54	34	20	89	89	51	29	18	3	72	89	28	95	26	4	74	61	13	134	19	67	4	71	66	65	77	26	21	38	55	29	41	83	77	32	57	50	77	13	42
ENSG00000284716.1	chr1;chr1	7998187;7999073	7998367;7999934	-;-	1043	0	3	0	10	0	0	6	14	0	0	2	19	0	2	3	1	2	0	9	0	8	0	13	0	12	8	7	6	3	2	0	6	0	27	2	0	4	13	0	0	0	2	7	0
ENSG00000116285.13	chr1;chr1;chr1;chr1;chr1;chr1;chr1;chr1;chr1;chr1;chr1;chr1;chr1;chr1;chr1;chr1	8004404;8011727;8013427;8013739;8014040;8015308;8015308;8015495;8015495;8015495;8015495;8015495;8026158;8026158;8026158;8026158	8004558;8014396;8015384;8014396;8014396;8015400;8015384;8015692;8015633;8015692;8015692;8015692;8026296;8026296;8026283;8026309	-;-;-;-;-;-;-;-;-;-;-;-;-;-;-;-	4179	792	932	237	267	827	561	875	217	4277	311	567	937	121	1119	1087	245	195	369	153	440	325	805	192	489	3726	311	2881	1556	395	853	390	711	746	1124	284	352	519	289	287	1530	397	369	796	975
ENSG00000238290.1	chr1;chr1;chr1	8026738;8029227;8121474	8027421;8029357;8122702	+;+;+	2044	19	0	0	8	4	2	13	100	36	1	6	10	0	18	34	60	45	15	1	5	147	12	127	5	71	5	18	18	60	3	0	27	14	3	18	4	77	4	5	48	12	1	12	10
ENSG00000232848.1	chr1;chr1	8057245;8058361	8057941;8058463	-;-	800	2	0	0	0	2	0	2	39	1	1	2	4	0	1	1	1	46	1	1	0	28	0	51	0	5	0	29	0	18	3	0	1	2	2	0	0	28	0	17	3	2	2	4	0
ENSG00000229305.1	chr1;chr1;chr1;chr1	8189824;8191216;8192182;8192557	8190331;8191495;8192254;8192770	+;+;+;+	1075	0	0	0	0	0	0	0	17	5	0	0	0	0	0	2	21	49	0	0	0	47	0	19	0	0	0	3	0	22	0	0	0	0	0	14	0	8	1	0	0	0	24	8	0
ENSG00000227634.3	chr1;chr1;chr1;chr1;chr1;chr1;chr1;chr1;chr1;chr1;chr1;chr1;chr1	8201518;8202429;8202690;8208667;8208667;8208672;8210487;8210487;8210487;8214625;8215079;8215079;8215079	8201568;8202876;8202876;8208873;8208873;8208873;8210595;8210595;8210595;8214678;8215210;8215207;8215210	+;+;+;+;+;+;+;+;+;+;+;+;+	1001	0	0	0	0	0	0	1	23	0	0	0	0	0	0	0	59	36	0	0	0	47	0	57	2	4	0	32	0	3	0	2	0	0	0	9	0	49	0	0	0	0	0	2	4
ENSG00000200975.1	chr1	8206434	8206597	-	164	0	0	0	0	0	0	1	12	3	4	1	0	2	0	0	1	5	0	0	0	2	0	11	0	5	0	0	0	18	3	1	2	1	2	5	1	5	0	3	0	0	0	1	0
ENSG00000233645.1	chr1;chr1	8218190;8220397	8218533;8220529	-;-	477	3	0	0	0	0	0	0	32	0	1	0	0	0	0	0	14	9	0	0	0	62	0	48	0	2	0	0	0	4	0	0	0	0	0	3	0	36	3	0	0	0	0	0	0
ENSG00000251977.1	chr1	8292157	8292263	-	107	0	0	0	0	0	0	0	0	0	0	0	0	0	0	4	0	0	0	0	0	0	0	2	0	0	0	0	0	0	0	0	0	0	0	0	0	0	0	0	0	0	0	0	0
ENSG00000162426.16	chr1;chr1;chr1;chr1;chr1;chr1;chr1;chr1;chr1;chr1;chr1;chr1;chr1;chr1;chr1;chr1;chr1;chr1;chr1;chr1;chr1;chr1;chr1;chr1;chr1	8318114;8324306;8324330;8325298;8325298;8325818;8325818;8330138;8330209;8330209;8330428;8335437;8335437;8335437;8335437;8336079;8337816;8337816;8337816;8339493;8339493;8339493;8343747;8343747;8343747	8318186;8324726;8324726;8325390;8325390;8326042;8326042;8330936;8330936;8330936;8330936;8335590;8335590;8335590;8335590;8336109;8337992;8337992;8337992;8339698;8339698;8339698;8344157;8344167;8344165	+;+;+;+;+;+;+;+;+;+;+;+;+;+;+;+;+;+;+;+;+;+;+;+;+	2600	13	0	1	14	77	12	7	122	12	11	123	20	6	88	55	59	33	8	4	6	171	27	336	17	0	17	47	27	49	35	41	16	18	16	22	6	138	17	32	12	22	16	26	25
ENSG00000252254.1	chr1	8328067	8328179	+	113	0	0	0	0	0	2	0	2	0	0	0	1	0	0	0	11	15	0	0	0	3	0	3	0	0	0	0	0	0	0	0	0	0	0	0	0	1	0	0	0	0	0	0	0
ENSG00000142599.19	chr1;chr1;chr1;chr1;chr1;chr1;chr1;chr1;chr1;chr1;chr1;chr1;chr1;chr1;chr1;chr1;chr1;chr1;chr1;chr1;chr1;chr1;chr1;chr1;chr1;chr1;chr1;chr1;chr1;chr1;chr1;chr1;chr1;chr1;chr1;chr1;chr1;chr1;chr1;chr1;chr1;chr1;chr1;chr1;chr1;chr1;chr1;chr1;chr1;chr1;chr1;chr1;chr1;chr1;chr1;chr1;chr1;chr1;chr1;chr1;chr1;chr1;chr1;chr1;chr1;chr1;chr1;chr1;chr1;chr1;chr1;chr1;chr1;chr1;chr1;chr1;chr1;chr1;chr1;chr1…	8352397;8352404;8352406;8352909;8353943;8354093;8354943;8355419;8355419;8355419;8355419;8355419;8355521;8356100;8356100;8356100;8356100;8356100;8358196;8358196;8358196;8358196;8359764;8359764;8359764;8359764;8360112;8360112;8360112;8360112;8361158;8361460;8361763;8361763;8361763;8361763;8361763;8361763;8362683;8362683;8362683;8362683;8362683;8362683;8363710;8364056;8364056;8364056;8364056;8364056…	8355120;8355120;8355120;8353178;8355120;8355120;8355082;8355599;8355599;8355599;8355599;8355599;8355599;8356246;8356246;8356246;8356246;8356246;8358916;8358916;8358916;8358916;8359986;8359986;8359986;8359986;8361490;8361490;8361490;8361490;8361490;8361490;8361876;8361876;8361876;8361876;8361876;8361876;8362844;8362844;8362844;8362844;8362844;8362844;8364255;8364255;8364255;8364255;8364255;8364255…	-;-;-;-;-;-;-;-;-;-;-;-;-;-;-;-;-;-;-;-;-;-;-;-;-;-;-;-;-;-;-;-;-;-;-;-;-;-;-;-;-;-;-;-;-;-;-;-;-;-;-;-;-;-;-;-;-;-;-;-;-;-;-;-;-;-;-;-;-;-;-;-;-;-;-;-;-;-;-;-;-;-;-;-;-;-;-;-;-;-;-;-;-;-;-;-;-;-;-;-;-;-;-;-;-;-;-;-;-;-;-;-;-;-;-;-;-;-;-;-;-;-;-;-;-;-;-;-;-;-;-;-;-;-;-;-;-;-;-;-;-;-;-;-;-;-;-;-;-;-;-;-;-;-;-;-;-;-;-;-;-;-;-;-;-;-;-;-;-;-;-;-;-;-;-;-;-	14112	4261	966	1371	2095	4101	4613	4942	1543	6095	2146	6288	3204	986	6759	4704	3100	823	3397	2514	2609	1879	4098	1201	934	3287	3833	3599	4436	3722	3977	3833	3609	4402	4439	2494	2636	1784	2436	3031	5501	3079	2330	4867	3355
ENSG00000232912.6	chr1;chr1;chr1;chr1;chr1;chr1;chr1;chr1;chr1;chr1;chr1	8424645;8425400;8425638;8428482;8428482;8428482;8429827;8429827;8429827;8434570;8434633	8424701;8425754;8425754;8428588;8428588;8428588;8430041;8429972;8429972;8435013;8434838	+;+;+;+;+;+;+;+;+;+;+	1178	38	10	41	51	103	42	120	95	59	16	80	17	7	158	74	96	54	88	29	34	62	47	86	4	130	106	41	115	48	31	70	68	87	123	45	28	61	52	52	113	48	24	91	32
ENSG00000221083.1	chr1	8511795	8511919	-	125	2	2	2	9	5	4	17	0	2	5	0	2	2	15	9	2	2	0	5	2	10	4	1	0	0	4	3	2	2	10	2	3	0	8	7	30	7	10	16	13	8	3	3	4
ENSG00000270282.1	chr1	8512653	8513021	+	369	32	6	2	31	13	66	45	56	49	76	30	55	0	48	41	17	29	54	15	15	65	43	73	2	27	48	17	58	119	47	53	1	28	8	13	45	38	11	35	25	39	31	62	23
ENSG00000234619.1	chr1	8750430	8751087	+	658	32	28	16	52	45	39	42	42	77	18	28	68	2	107	73	36	44	36	3	16	29	53	26	18	22	38	21	62	53	62	15	50	40	53	36	63	32	5	103	94	39	77	45	23
ENSG00000224315.2	chr1	8786211	8786913	-	703	8	19	1	31	31	24	19	28	79	15	22	56	2	36	35	14	12	65	18	46	23	27	32	6	54	32	8	35	38	24	24	12	31	41	24	10	13	8	12	11	6	27	17	10
ENSG00000222511.2	chr1	8796571	8796673	-	103	0	3	0	0	8	5	1	9	14	0	8	0	0	3	1	0	0	0	0	0	4	7	2	0	0	0	0	0	6	2	0	0	4	0	1	0	0	5	0	2	0	1	3	0
ENSG00000226545.1	chr1;chr1	8798475;8799309	8798691;8799506	+;+	415	11	41	3	11	11	14	14	19	40	8	13	33	5	78	2	9	31	49	6	1	31	34	30	9	29	14	15	14	16	6	28	37	1	24	22	20	14	13	0	15	23	13	4	16
ENSG00000228423.2	chr1;chr1	8805860;8806779	8805939;8807051	-;-	353	34	4	24	18	67	47	48	11	43	14	42	38	6	62	95	16	35	19	35	18	10	32	33	14	11	48	28	25	23	27	22	27	76	52	15	7	17	23	16	71	63	25	43	21
ENSG00000229716.2	chr1	8831007	8831375	+	369	0	0	0	0	0	2	0	15	0	5	0	0	0	0	0	1	2	0	0	0	17	0	21	0	0	0	2	0	0	0	0	0	3	1	0	0	7	0	1	0	0	0	0	0
ENSG00000074800.16	chr1;chr1;chr1;chr1;chr1;chr1;chr1;chr1;chr1;chr1;chr1;chr1;chr1;chr1;chr1;chr1;chr1;chr1;chr1;chr1;chr1;chr1;chr1;chr1;chr1;chr1;chr1;chr1;chr1;chr1;chr1;chr1;chr1;chr1;chr1;chr1;chr1;chr1;chr1;chr1;chr1;chr1;chr1;chr1;chr1;chr1;chr1;chr1;chr1;chr1;chr1;chr1;chr1;chr1;chr1;chr1;chr1;chr1;chr1;chr1;chr1;chr1;chr1;chr1;chr1;chr1;chr1;chr1;chr1;chr1;chr1;chr1;chr1;chr1;chr1;chr1;chr1;chr1;chr1;chr1…	8861000;8861002;8861002;8861007;8862887;8862887;8862887;8862887;8863114;8863235;8863235;8863235;8863235;8863891;8863891;8863891;8863891;8863891;8865285;8865285;8865285;8865285;8865285;8866009;8866279;8866279;8866279;8866279;8866279;8866279;8866361;8866432;8866480;8867117;8867117;8867117;8867117;8867117;8867117;8867117;8867117;8867117;8867184;8867988;8867988;8867988;8867988;8867988;8867988;8867988…	8861429;8861429;8861429;8861429;8862945;8862945;8862945;8862945;8863343;8863343;8863343;8863343;8863343;8864092;8864092;8864092;8864092;8864092;8865482;8865482;8865482;8865482;8865482;8866073;8866501;8866501;8866501;8866501;8866501;8866501;8866501;8866501;8866501;8867250;8867250;8867250;8867250;8867250;8867250;8867250;8867250;8867250;8867250;8868057;8868057;8868057;8868057;8868057;8868057;8868057…	-;-;-;-;-;-;-;-;-;-;-;-;-;-;-;-;-;-;-;-;-;-;-;-;-;-;-;-;-;-;-;-;-;-;-;-;-;-;-;-;-;-;-;-;-;-;-;-;-;-;-;-;-;-;-;-;-;-;-;-;-;-;-;-;-;-;-;-;-;-;-;-;-;-;-;-;-;-;-;-;-;-;-;-;-;-;-;-;-;-;-;-;-;-;-;-;-;-;-;-;-;-;-;-;-;-;-;-;-;-;-;-;-;-;-	5216	1053	1495	1092	895	1917	5024	1474	603	1130	982	1644	1832	360	1633	1508	1199	371	1228	1274	2601	1304	1698	572	578	7345	1344	1515	1153	921	1517	1184	1189	3260	1680	710	1973	620	931	757	4976	1550	2360	1137	964
ENSG00000274258.1	chr1	8866502	8866590	-	89	0	0	0	0	0	3	0	0	0	0	0	3	0	0	0	0	0	7	0	28	13	0	9	0	0	0	0	0	0	20	0	1	0	0	0	7	2	3	0	0	0	0	6	2
ENSG00000230679.1	chr1;chr1	8878835;8879565	8878960;8879894	+;+	456	0	4	1	0	0	0	0	8	26	0	0	1	0	0	0	3	1	0	0	0	17	0	11	0	3	0	12	0	1	0	0	0	0	0	0	0	10	9	0	3	0	0	3	0
ENSG00000201725.1	chr1	8883427	8883533	-	107	0	0	0	0	0	0	0	2	0	0	0	0	0	0	0	1	0	5	0	0	4	0	8	0	0	0	1	7	9	8	0	0	0	0	0	0	0	0	0	28	0	0	3	0
ENSG00000238249.2	chr1	8893409	8894151	+	743	0	0	9	0	0	9	2	33	2	0	1	4	0	0	3	13	5	1	0	0	8	3	19	0	6	0	3	1	2	1	0	0	2	11	3	0	16	0	5	0	0	0	0	1
ENSG00000232208.2	chr1	8907393	8907744	-	352	0	0	0	0	0	0	0	51	0	2	1	1	0	0	0	19	5	0	0	0	27	0	66	0	2	0	9	1	20	0	0	0	0	2	0	1	33	0	0	0	0	1	0	0
ENSG00000232663.2	chr1	8909742	8909904	+	163	0	0	0	0	0	0	0	0	0	0	0	0	0	0	0	0	4	0	0	0	5	0	4	0	0	0	0	0	1	0	0	0	0	0	7	0	0	0	0	2	0	0	0	0
ENSG00000131686.15	chr1;chr1;chr1;chr1;chr1;chr1;chr1;chr1;chr1;chr1;chr1;chr1;chr1;chr1;chr1;chr1;chr1;chr1;chr1;chr1;chr1;chr1;chr1;chr1;chr1;chr1;chr1;chr1;chr1;chr1;chr1;chr1;chr1;chr1;chr1;chr1;chr1;chr1	8945867;8945868;8945868;8945882;8945887;8945887;8949263;8949263;8949263;8949263;8951423;8957137;8957137;8957137;8957142;8958910;8958910;8958910;8958910;8958910;8962587;8962587;8962587;8962587;8962587;8967659;8967659;8967659;8967659;8967659;8970867;8970867;8970867;8970867;8974347;8974622;8974622;8974622	8945965;8945965;8945965;8945965;8945965;8945965;8949442;8949442;8949442;8949351;8952651;8957285;8957285;8957285;8957285;8959002;8959002;8959002;8959002;8959002;8962656;8962656;8962656;8962656;8962656;8967816;8967816;8967816;8967745;8967816;8970981;8970981;8970981;8970981;8974444;8974704;8975092;8974874	+;+;+;+;+;+;+;+;+;+;+;+;+;+;+;+;+;+;+;+;+;+;+;+;+;+;+;+;+;+;+;+;+;+;+;+;+;+	2662	0	34	0	0	4	0	0	134	0	1	1	16	0	2	0	78	66	0	0	6	110	0	256	5	13	0	21	0	26	0	0	11	2	2	10	0	111	3	1	0	0	28	0	10
ENSG00000265141.2	chr1	8979576	8979874	-	299	0	0	0	0	0	0	0	10	0	0	1	0	0	1	1	4	8	0	0	0	4	0	12	0	0	1	1	0	2	0	0	0	0	1	0	0	17	1	0	0	0	0	0	2
ENSG00000197241.3	chr1;chr1;chr1;chr1;chr1;chr1;chr1;chr1;chr1;chr1;chr1;chr1	9003300;9004752;9007310;9010143;9013525;9014681;9015117;9018223;9019209;9022918;9024976;9026295	9003518;9004879;9007385;9010244;9013635;9014868;9015242;9018375;9019333;9023078;9025074;9026345	-;-;-;-;-;-;-;-;-;-;-;-	1539	0	0	0	0	0	0	0	49	0	0	0	0	0	0	0	15	39	0	0	0	65	0	145	0	1	0	4	0	13	0	0	0	0	0	5	0	71	0	1	0	0	0	0	0
ENSG00000142583.18	chr1;chr1;chr1;chr1;chr1;chr1;chr1;chr1;chr1;chr1;chr1;chr1;chr1;chr1;chr1;chr1;chr1;chr1;chr1;chr1;chr1;chr1;chr1;chr1;chr1;chr1;chr1;chr1;chr1;chr1;chr1;chr1;chr1;chr1;chr1;chr1;chr1;chr1;chr1;chr1;chr1;chr1;chr1;chr1;chr1;chr1;chr1;chr1;chr1;chr1;chr1;chr1;chr1;chr1;chr1;chr1;chr1;chr1;chr1;chr1;chr1;chr1;chr1	9035106;9037897;9038431;9038431;9038828;9038828;9039552;9039552;9039800;9040064;9040080;9041785;9041785;9041785;9041785;9041785;9041858;9047610;9047610;9047610;9047610;9047610;9047610;9047610;9047611;9057448;9057448;9057448;9057448;9057448;9057448;9057448;9057448;9057498;9058152;9058152;9058152;9058152;9058152;9058152;9058152;9058152;9058152;9069504;9069504;9069504;9069504;9069504;9069504;9069504…	9037789;9038024;9038506;9038506;9038929;9038929;9039895;9039662;9039987;9040189;9041937;9041937;9041937;9041937;9041937;9041937;9041937;9047734;9047734;9047734;9047734;9047734;9047734;9047734;9047734;9057608;9057608;9057608;9057608;9057608;9057608;9057608;9057608;9057608;9058250;9058250;9058250;9058250;9058250;9058250;9058250;9058250;9058250;9069594;9069594;9069594;9069594;9069594;9069594;9069594…	-;-;-;-;-;-;-;-;-;-;-;-;-;-;-;-;-;-;-;-;-;-;-;-;-;-;-;-;-;-;-;-;-;-;-;-;-;-;-;-;-;-;-;-;-;-;-;-;-;-;-;-;-;-;-;-;-;-;-;-;-;-;-	6632	27	78	25	19	174	152	44	226	25	7	36	17	17	12	37	149	107	11	62	32	263	24	374	19	143	26	85	48	69	32	25	22	153	93	41	17	246	44	178	412	83	74	73	149
ENSG00000252404.1	chr1	9082696	9082879	+	184	0	0	1	1	1	2	4	3	0	13	0	0	3	0	1	7	1	1	3	0	1	0	2	4	4	2	3	0	1	10	0	1	2	0	1	0	10	2	1	8	0	0	3	0
ENSG00000180758.12	chr1;chr1;chr1;chr1;chr1;chr1;chr1;chr1	9100305;9104532;9105486;9111169;9111276;9111276;9128645;9128645	9104634;9104634;9105680;9111489;9111370;9111489;9128781;9129102	-;-;-;-;-;-;-;-	5304	128	112	132	117	173	341	200	161	138	91	352	224	79	279	360	262	68	88	254	189	264	212	301	58	303	137	185	55	144	166	191	218	326	280	157	155	238	110	144	337	141	262	284	50
ENSG00000228526.7	chr1;chr1;chr1;chr1;chr1;chr1;chr1	9148011;9179631;9182007;9182007;9183631;9196912;9197143	9151835;9182295;9182295;9182392;9183750;9198703;9198906	-;-;-;-;-;-;-	8702	343	143	114	469	189	613	321	301	178	230	375	585	105	472	198	476	337	337	121	279	383	420	350	124	256	253	471	573	292	325	408	452	801	669	337	461	389	246	296	409	396	184	240	224
ENSG00000284357.1	chr1	9151668	9151777	-	110	0	0	0	0	0	0	0	0	0	0	0	0	0	0	0	0	0	0	0	0	0	0	0	0	0	0	0	0	0	0	0	0	0	0	0	0	0	0	0	0	0	0	0	0
ENSG00000234546.4	chr1;chr1;chr1;chr1;chr1;chr1;chr1;chr1;chr1;chr1;chr1;chr1;chr1;chr1;chr1;chr1;chr1;chr1;chr1	9182004;9182164;9182165;9182178;9182214;9183633;9183633;9183633;9183633;9183633;9185177;9187536;9191038;9191040;9191393;9191393;9191393;9191393;9195885	9182316;9182316;9182316;9182316;9182316;9183807;9183807;9183807;9183807;9183807;9185386;9187789;9191124;9191124;9192089;9192094;9192089;9192089;9196284	+;+;+;+;+;+;+;+;+;+;+;+;+;+;+;+;+;+;+	2141	24	55	4	105	43	102	30	80	29	2	36	17	6	65	68	40	65	61	31	34	89	77	109	0	20	41	66	15	64	27	38	20	130	33	35	108	63	13	24	4	60	0	30	13
ENSG00000049239.13	chr1;chr1;chr1;chr1;chr1;chr1;chr1;chr1;chr1;chr1;chr1;chr1	9234774;9239844;9244925;9244925;9246966;9246966;9262059;9262059;9263509;9263509;9265530;9271145	9235066;9240018;9245561;9245561;9247083;9247083;9262328;9262328;9267898;9271337;9268037;9271337	+;+;+;+;+;+;+;+;+;+;+;+	9322	1471	655	402	1102	1230	1308	2408	737	1782	1604	1653	1187	649	1742	1608	1344	503	1202	995	1597	1353	1515	672	666	983	1596	1849	1946	910	1675	1621	2234	2004	2076	1130	1163	722	1521	1662	1659	1179	1083	1476	830
ENSG00000171621.14	chr1;chr1;chr1;chr1;chr1;chr1;chr1;chr1;chr1;chr1	9292894;9294528;9351431;9355707;9355743;9355743;9355743;9367448;9367448;9367448	9293071;9294594;9351610;9356585;9356497;9356585;9356585;9367575;9367863;9369532	+;+;+;+;+;+;+;+;+;+	3389	437	141	103	153	52	268	483	102	376	448	48	479	139	267	366	305	177	139	229	456	373	271	192	225	669	444	657	577	116	727	103	543	740	417	247	346	181	416	452	119	241	200	570	183
ENSG00000284652.1	chr1	9421098	9422862	-	1765	12	0	0	0	18	0	10	76	1	0	0	0	0	0	0	41	50	16	0	3	86	1	127	0	0	3	20	0	35	5	0	11	6	1	19	3	65	4	26	0	2	3	5	19
ENSG00000284693.1	chr1;chr1;chr1;chr1;chr1;chr1	9425094;9426649;9426975;9428842;9428922;9440459	9427381;9427381;9427381;9428916;9429075;9440564	-;-;-;-;-;-	2623	7	0	3	4	2	27	28	120	15	6	1	3	0	2	11	51	41	24	14	6	147	14	211	13	0	8	49	3	26	31	0	33	28	6	45	32	147	23	17	1	8	10	0	30
ENSG00000252956.1	chr1	9437669	9437778	-	110	0	0	0	0	0	0	1	7	0	0	0	0	0	0	0	0	0	0	0	0	25	0	3	0	0	0	12	0	0	0	0	0	0	0	0	0	0	0	0	0	0	0	0	0
ENSG00000235263.1	chr1;chr1	9501092;9503221	9501548;9503471	-;-	708	3	0	0	0	0	0	0	99	0	0	0	0	28	0	0	48	24	0	0	0	49	0	85	1	3	0	26	0	37	2	22	0	0	0	18	0	50	0	0	0	0	0	0	0
ENSG00000171612.7	chr1;chr1;chr1;chr1;chr1;chr1;chr1	9539465;9553626;9567284;9570258;9573346;9579954;9582299	9539747;9553805;9567361;9570358;9573412;9580234;9585173	+;+;+;+;+;+;+	3865	41	90	22	21	103	75	86	127	137	26	171	50	5	86	71	121	20	62	95	68	70	35	126	17	241	28	61	47	66	82	84	94	39	44	25	155	80	28	57	58	48	55	70	29
ENSG00000231181.1	chr1	9576427	9576985	+	559	48	3	8	26	10	22	23	37	41	5	34	25	7	18	35	4	21	56	56	10	42	17	24	12	44	21	22	64	6	10	25	12	4	22	2	60	30	28	22	22	6	13	37	12
ENSG00000188807.13	chr1;chr1;chr1;chr1;chr1;chr1;chr1;chr1;chr1;chr1;chr1;chr1;chr1;chr1;chr1;chr1;chr1;chr1;chr1;chr1;chr1;chr1;chr1;chr1;chr1;chr1;chr1;chr1;chr1;chr1;chr1;chr1;chr1	9588911;9588922;9595890;9595890;9596859;9596859;9596897;9598449;9598449;9598449;9601105;9601105;9601105;9602069;9602069;9602069;9606214;9607557;9607557;9607557;9607728;9609840;9609840;9610506;9610506;9610506;9611015;9611753;9611753;9611753;9612986;9612986;9612986	9589043;9589043;9596010;9596010;9597053;9597053;9597053;9598625;9598625;9598625;9601454;9601454;9601454;9604954;9602272;9602272;9606638;9607789;9607685;9607789;9607789;9609911;9609911;9610805;9610805;9610805;9611073;9611890;9611890;9611890;9613247;9614873;9614877	+;+;+;+;+;+;+;+;+;+;+;+;+;+;+;+;+;+;+;+;+;+;+;+;+;+;+;+;+;+;+;+;+	6981	189	105	61	81	153	245	213	190	147	95	322	107	57	225	131	284	108	193	100	199	301	226	445	98	507	181	130	160	92	106	251	101	130	171	131	168	292	127	226	231	165	134	152	187
ENSG00000171608.16	chr1;chr1;chr1;chr1;chr1;chr1;chr1;chr1;chr1;chr1;chr1;chr1;chr1;chr1;chr1;chr1;chr1;chr1;chr1;chr1;chr1;chr1;chr1;chr1;chr1;chr1;chr1;chr1;chr1;chr1;chr1;chr1;chr1;chr1;chr1;chr1;chr1;chr1;chr1;chr1;chr1;chr1;chr1;chr1;chr1;chr1;chr1;chr1;chr1;chr1;chr1;chr1;chr1;chr1;chr1;chr1;chr1;chr1;chr1;chr1;chr1;chr1;chr1;chr1;chr1;chr1;chr1;chr1;chr1;chr1;chr1;chr1;chr1;chr1;chr1;chr1;chr1;chr1;chr1;chr1…	9651731;9651732;9651732;9688176;9691467;9691467;9691467;9691467;9691675;9710198;9710198;9710424;9710424;9710424;9710424;9710424;9715541;9715541;9715541;9715541;9715541;9715699;9715849;9715849;9715849;9715849;9715849;9715849;9716276;9716440;9716440;9716440;9716440;9716440;9716959;9716959;9717064;9717064;9717064;9717064;9717537;9717537;9717537;9717537;9717537;9717537;9718694;9718694;9718694;9718694…	9651802;9651802;9651802;9688313;9691571;9691571;9691571;9691571;9691946;9710280;9710280;9710596;9710596;9710596;9710596;9710596;9715769;9715769;9715769;9715769;9715769;9715769;9716163;9716078;9716078;9716078;9716078;9716078;9716619;9716619;9716619;9716619;9716619;9716619;9717108;9717108;9717108;9717108;9717108;9717108;9717581;9717626;9717626;9717626;9717626;9717626;9718915;9718915;9718915;9718915…	+;+;+;+;+;+;+;+;+;+;+;+;+;+;+;+;+;+;+;+;+;+;+;+;+;+;+;+;+;+;+;+;+;+;+;+;+;+;+;+;+;+;+;+;+;+;+;+;+;+;+;+;+;+;+;+;+;+;+;+;+;+;+;+;+;+;+;+;+;+;+;+;+;+;+;+;+;+;+;+;+;+;+;+;+;+;+;+;+;+;+;+;+;+;+;+;+;+;+;+;+;+;+;+;+;+;+;+;+;+;+;+;+;+;+;+;+;+;+;+;+;+;+;+;+;+;+;+	6333	255	65	124	343	348	425	649	281	309	160	246	390	131	351	316	270	212	292	282	715	672	179	542	130	588	452	395	312	187	206	304	842	645	725	182	192	459	233	342	225	501	513	338	291
ENSG00000179840.5	chr1;chr1	9652610;9654198	9654043;9654586	-;-	1823	43	1	19	22	30	14	13	52	34	6	3	11	5	7	61	116	96	38	8	52	153	20	144	14	22	30	24	26	44	10	22	57	27	19	50	10	110	41	18	9	10	45	3	10
ENSG00000233268.3	chr1;chr1	9660828;9662297	9660918;9662626	-;-	421	2	0	0	0	0	11	5	12	0	5	13	1	0	19	2	41	1	1	1	1	16	0	17	0	2	1	3	1	1	0	2	0	33	7	9	1	1	0	0	26	0	0	3	11
ENSG00000231789.2	chr1;chr1;chr1	9672426;9680712;9687335	9672719;9681135;9687555	-;-;-	939	9	6	4	27	14	2	19	38	41	1	5	4	0	23	43	16	4	18	23	33	111	9	51	10	46	17	4	17	16	4	44	6	22	59	36	10	45	15	12	29	48	81	3	18
ENSG00000171603.18	chr1;chr1;chr1;chr1;chr1;chr1;chr1;chr1;chr1;chr1;chr1;chr1;chr1;chr1;chr1;chr1;chr1;chr1;chr1;chr1;chr1;chr1;chr1;chr1;chr1;chr1;chr1;chr1;chr1;chr1;chr1;chr1;chr1;chr1;chr1;chr1;chr1;chr1;chr1;chr1;chr1;chr1;chr1;chr1;chr1;chr1;chr1;chr1;chr1;chr1;chr1;chr1;chr1;chr1;chr1;chr1;chr1;chr1;chr1;chr1;chr1;chr1;chr1;chr1;chr1;chr1;chr1;chr1;chr1;chr1;chr1;chr1;chr1;chr1;chr1;chr1	9728926;9729027;9729028;9729028;9729028;9731122;9731206;9731206;9731206;9731206;9731761;9731761;9731761;9731761;9731761;9733401;9733401;9733401;9733401;9733401;9733972;9733972;9733972;9733972;9734948;9734948;9734948;9734948;9735467;9735467;9735467;9735467;9735885;9735885;9735885;9735885;9737498;9737498;9737498;9741094;9741094;9741094;9741094;9743884;9743884;9743884;9743884;9744395;9744395;9744395…	9730705;9730705;9730705;9730705;9730705;9731390;9731390;9731390;9731390;9731390;9731896;9731896;9731896;9731896;9731896;9733546;9733546;9733486;9733546;9733546;9734142;9734142;9734142;9734142;9735174;9735174;9735174;9735174;9735615;9735615;9735615;9735615;9736042;9736042;9736042;9736042;9737554;9737554;9737554;9741256;9741256;9741256;9741256;9744005;9744005;9744005;9744005;9744643;9744643;9744643…	-;-;-;-;-;-;-;-;-;-;-;-;-;-;-;-;-;-;-;-;-;-;-;-;-;-;-;-;-;-;-;-;-;-;-;-;-;-;-;-;-;-;-;-;-;-;-;-;-;-;-;-;-;-;-;-;-;-;-;-;-;-;-;-;-;-;-;-;-;-;-;-;-;-;-;-	5241	2125	926	1110	1261	6662	4398	2793	883	2173	1808	6477	2614	703	5584	2641	1448	524	1959	1468	2420	1613	2234	554	824	3154	2480	1889	2191	3198	2033	3369	1818	2745	2574	1018	3372	1057	1509	1450	2246	2025	1344	2633	2411
ENSG00000271264.1	chr1;chr1	9780822;9781074	9780900;9781240	+;+	246	9	0	0	3	46	10	0	8	9	0	4	15	1	28	0	8	0	16	8	15	2	3	1	0	0	3	0	0	23	3	0	5	0	8	3	18	9	2	1	18	6	22	12	5
ENSG00000280113.2	chr1;chr1	9826289;9827610	9828271;9828258	-;-	1983	14	19	2	4	5	4	1	108	5	5	16	4	0	6	2	22	74	2	0	2	99	2	127	5	22	12	17	4	15	0	0	6	2	14	16	0	106	1	1	11	2	0	0	29
ENSG00000178585.15	chr1;chr1;chr1;chr1;chr1;chr1;chr1;chr1;chr1;chr1;chr1;chr1;chr1;chr1;chr1;chr1;chr1;chr1;chr1;chr1;chr1	9848276;9850109;9850450;9850659;9871187;9871187;9871187;9871187;9871969;9871969;9871969;9871969;9877905;9877905;9877905;9877905;9878140;9883705;9893009;9910095;9910095	9850776;9850776;9850776;9850776;9871277;9871277;9871277;9871277;9872088;9872088;9872088;9872088;9877989;9877989;9877989;9877989;9878176;9883738;9893237;9910336;9910269	-;-;-;-;-;-;-;-;-;-;-;-;-;-;-;-;-;-;-;-;-	3339	159	172	151	130	132	529	202	225	385	101	448	226	96	391	141	234	88	225	228	247	258	133	167	75	429	224	178	168	143	147	164	145	320	200	191	624	149	125	160	416	110	133	114	222
ENSG00000223989.1	chr1;chr1;chr1	9848318;9849369;9849986	9848466;9849474;9850154	+;+;+	424	0	0	0	0	0	0	0	0	0	0	0	0	0	0	0	0	0	0	0	0	0	0	0	0	0	0	0	0	0	0	0	0	0	0	0	0	0	0	0	0	0	0	0	0
ENSG00000285701.1	chr1;chr1;chr1	9900614;9904300;9907757	9900991;9904405;9908034	+;+;+	762	40	32	22	46	20	67	60	71	106	66	62	51	3	96	28	68	68	1	42	16	57	50	84	6	58	16	32	34	25	56	74	55	53	41	41	101	59	17	13	48	21	49	43	36
ENSG00000162441.12	chr1;chr1;chr1;chr1;chr1;chr1;chr1;chr1;chr1;chr1;chr1;chr1;chr1;chr1;chr1;chr1;chr1;chr1;chr1;chr1;chr1;chr1;chr1;chr1;chr1;chr1;chr1;chr1;chr1;chr1	9922113;9926293;9929720;9930253;9930261;9931891;9931891;9931891;9931891;9931891;9932803;9932803;9932803;9932803;9934762;9934762;9934762;9934762;9935492;9935492;9935492;9935492;9936519;9936519;9936519;9942624;9942624;9942624;9943249;9943349	9922358;9930457;9930457;9930457;9930457;9932180;9931972;9931972;9931972;9931972;9932898;9932898;9932898;9932898;9934860;9934860;9934860;9934860;9935627;9935627;9935627;9935620;9936627;9936627;9936627;9942782;9942768;9942782;9943391;9943407	-;-;-;-;-;-;-;-;-;-;-;-;-;-;-;-;-;-;-;-;-;-;-;-;-;-;-;-;-;-	5459	313	213	162	266	475	411	481	209	339	119	443	524	53	437	709	340	104	474	179	162	258	382	168	99	708	246	294	200	265	251	511	231	526	494	214	338	171	216	255	615	308	183	346	272
ENSG00000228150.1	chr1;chr1	9942923;9949638	9943025;9949974	+;+	440	3	4	2	0	17	13	2	4	1	0	0	5	0	5	2	18	4	19	4	0	34	13	17	1	1	0	4	1	2	2	2	0	16	7	1	2	13	11	4	0	0	2	2	0
ENSG00000173614.14	chr1;chr1;chr1;chr1;chr1;chr1;chr1;chr1;chr1;chr1;chr1;chr1;chr1;chr1;chr1;chr1;chr1;chr1;chr1;chr1	9943428;9943429;9943475;9943488;9972018;9972018;9972018;9972018;9975592;9975592;9975592;9981031;9981031;9981031;9981052;9981256;9982301;9982301;9983004;9985136	9943515;9943515;9943515;9943515;9972188;9972503;9972188;9972188;9975775;9975775;9975775;9981170;9981170;9981170;9981170;9981766;9985498;9982870;9983669;9985501	+;+;+;+;+;+;+;+;+;+;+;+;+;+;+;+;+;+;+;+	4610	84	16	19	82	199	104	118	121	131	105	114	142	41	215	129	169	60	70	90	116	114	28	184	28	146	89	64	59	64	97	45	107	170	122	74	90	125	42	110	110	69	90	221	86
ENSG00000202415.1	chr1	9947318	9947636	+	319	20	2	2	32	60	30	28	51	10	8	18	32	0	22	8	30	55	6	6	12	75	9	79	5	30	20	37	4	38	6	10	4	6	14	24	10	45	17	26	24	23	7	13	20
ENSG00000283611.2	chr1;chr1;chr1;chr1;chr1	9950572;9951231;9952339;9955821;9960714	9950648;9951297;9952469;9955915;9960787	-;-;-;-;-	444	18	25	7	23	24	20	20	36	15	2	31	49	0	24	73	19	10	20	23	4	29	8	45	1	75	22	9	0	46	19	10	0	3	35	9	30	31	16	23	19	35	32	1	13
ENSG00000265521.1	chr1	9967381	9967458	+	78	0	0	0	4	21	0	7	16	0	0	0	1	0	8	0	0	1	0	6	0	0	0	18	0	25	0	5	0	0	0	0	0	1	0	0	0	13	3	0	2	4	14	1	3
ENSG00000241326.1	chr1;chr1	9983141;9984283	9983290;9984568	+;+	436	0	0	0	0	0	0	0	0	0	0	0	0	0	0	0	0	0	0	0	0	0	0	0	0	0	0	0	0	0	0	0	0	0	0	0	0	0	0	0	0	0	0	0	0
ENSG00000162444.12	chr1;chr1;chr1;chr1;chr1;chr1;chr1;chr1;chr1	9997206;9997228;10004093;10007570;10007570;10008173;10008173;10015782;10015782	9997331;9997331;10004307;10007748;10007748;10008274;10008274;10016021;10016020	+;+;+;+;+;+;+;+;+	862	13	63	11	35	13	26	83	78	49	71	16	1	40	26	2	25	32	97	17	4	47	20	72	11	378	40	41	55	23	63	17	114	57	101	27	36	50	39	12	12	51	8	24	19
ENSG00000130939.20	chr1;chr1;chr1;chr1;chr1;chr1;chr1;chr1;chr1;chr1;chr1;chr1;chr1;chr1;chr1;chr1;chr1;chr1;chr1;chr1;chr1;chr1;chr1;chr1;chr1;chr1;chr1;chr1;chr1;chr1;chr1;chr1;chr1;chr1;chr1;chr1;chr1;chr1;chr1;chr1;chr1;chr1;chr1;chr1;chr1;chr1;chr1;chr1;chr1;chr1;chr1;chr1;chr1;chr1;chr1;chr1;chr1;chr1;chr1;chr1;chr1;chr1;chr1;chr1;chr1;chr1;chr1;chr1;chr1;chr1;chr1;chr1;chr1;chr1;chr1;chr1;chr1;chr1;chr1;chr1…	10032832;10032832;10032958;10033274;10072028;10072028;10072028;10072028;10072454;10095461;10095461;10095461;10100861;10101108;10101108;10101108;10102948;10102948;10102948;10102948;10105516;10105516;10105516;10106197;10106197;10107222;10117459;10117459;10117459;10119513;10119513;10119513;10121962;10121962;10121962;10122042;10126794;10126794;10126794;10126794;10128339;10129392;10129392;10129392;101…	10033694;10033694;10033694;10033694;10072214;10072214;10072214;10072214;10073118;10095596;10095596;10095596;10101195;10101195;10101195;10101195;10103185;10103092;10103092;10103092;10105744;10105744;10105744;10106583;10106583;10107374;10117600;10117600;10117600;10119613;10119613;10119613;10122076;10122076;10122076;10122076;10126877;10126877;10126877;10126877;10129448;10129448;10129448;10129448;101…	+;+;+;+;+;+;+;+;+;+;+;+;+;+;+;+;+;+;+;+;+;+;+;+;+;+;+;+;+;+;+;+;+;+;+;+;+;+;+;+;+;+;+;+;+;+;+;+;+;+;+;+;+;+;+;+;+;+;+;+;+;+;+;+;+;+;+;+;+;+;+;+;+;+;+;+;+;+;+;+;+;+;+;+;+;+;+;+;+;+;+;+;+;+;+;+;+;+;+;+;+;+;+;+;+;+;+;+;+;+;+;+;+;+;+	9237	1020	680	466	764	1460	1370	1030	612	1134	600	981	1079	190	1431	1237	851	468	819	605	897	853	1018	627	336	1684	885	947	969	1084	907	1157	921	1352	1100	717	709	555	605	770	1338	815	766	1266	527
ENSG00000224340.1	chr1	10054445	10054781	-	337	1	0	0	3	2	0	0	10	0	0	1	1	0	0	24	2	7	0	1	0	4	2	10	0	28	0	19	0	2	7	0	2	13	26	1	9	7	0	0	5	0	0	0	0
ENSG00000233623.2	chr1;chr1	10058671;10059242	10058943;10059648	+;+	680	16	13	30	2	17	23	11	27	3	15	0	41	1	58	22	75	25	19	2	1	49	25	47	4	27	12	6	0	21	19	12	22	2	19	10	3	35	6	1	15	26	34	5	2
ENSG00000201746.1	chr1	10163268	10163374	+	107	6	6	1	17	40	21	39	8	8	0	3	7	0	7	0	24	1	0	24	0	3	8	11	0	11	37	7	18	9	0	30	0	0	0	16	13	11	0	9	43	0	6	11	6
ENSG00000054523.18	chr1;chr1;chr1;chr1;chr1;chr1;chr1;chr1;chr1;chr1;chr1;chr1;chr1;chr1;chr1;chr1;chr1;chr1;chr1;chr1;chr1;chr1;chr1;chr1;chr1;chr1;chr1;chr1;chr1;chr1;chr1;chr1;chr1;chr1;chr1;chr1;chr1;chr1;chr1;chr1;chr1;chr1;chr1;chr1;chr1;chr1;chr1;chr1;chr1;chr1;chr1;chr1;chr1;chr1;chr1;chr1;chr1;chr1;chr1;chr1;chr1;chr1;chr1;chr1;chr1;chr1;chr1;chr1;chr1;chr1;chr1;chr1;chr1;chr1;chr1;chr1;chr1;chr1;chr1;chr1…	10210570;10210805;10210805;10211616;10230764;10232250;10232250;10232250;10232250;10232250;10232250;10232329;10232329;10256247;10256247;10256247;10256247;10256247;10256247;10256247;10256247;10258493;10258493;10258493;10258493;10258493;10258493;10258493;10258493;10261905;10261905;10261905;10261905;10261905;10261905;10261905;10261905;10267380;10267380;10267380;10267380;10267380;10267380;10267380;102…	10210878;10210878;10210878;10211738;10230997;10232434;10232434;10232434;10232434;10232434;10232434;10232434;10232434;10256323;10256323;10256323;10256323;10256323;10256323;10256323;10256323;10258672;10258672;10258672;10258672;10258672;10258672;10258672;10258672;10261970;10261970;10261970;10261970;10261970;10261970;10261970;10261970;10267558;10267558;10267558;10267558;10267558;10267558;10267558;102…	+;+;+;+;+;+;+;+;+;+;+;+;+;+;+;+;+;+;+;+;+;+;+;+;+;+;+;+;+;+;+;+;+;+;+;+;+;+;+;+;+;+;+;+;+;+;+;+;+;+;+;+;+;+;+;+;+;+;+;+;+;+;+;+;+;+;+;+;+;+;+;+;+;+;+;+;+;+;+;+;+;+;+;+;+;+;+;+;+;+;+;+;+;+;+;+;+;+;+;+;+;+;+;+;+;+;+;+;+;+;+;+;+;+;+;+;+;+;+;+;+;+;+;+;+;+;+;+;+;+;+;+;+;+;+;+;+;+;+;+;+;+;+;+;+;+;+;+;+;+;+;+;+;+;+;+;+;+;+;+;+;+;+;+;+;+;+;+;+;+;+;+;+;+;+;+;+;+;+;+;+;+;+;+;+;+;+;+;+;+;+;+;+;+;+;+;+;+;+;+…	17955	1183	1279	941	1070	2182	2439	2176	1041	1357	1115	3549	2412	394	2286	1844	1169	683	1566	1061	1502	1334	1816	897	813	5058	1148	1921	2554	1592	2174	1707	2171	2712	1695	970	1546	977	1553	2583	1747	1649	1262	2259	1029
ENSG00000264881.1	chr1	10227718	10227803	+	86	0	0	0	3	0	0	0	2	0	0	1	10	0	0	0	34	0	0	0	0	0	4	1	0	3	0	5	0	0	0	0	3	0	0	9	0	0	2	18	0	0	0	0	0
ENSG00000199562.1	chr1	10298966	10299072	+	107	625	565	415	568	1543	922	1491	286	945	550	749	944	152	1151	906	255	313	946	364	440	315	707	26	276	920	467	445	926	572	672	910	707	1042	725	562	620	207	731	657	942	866	607	604	1188
ENSG00000264501.2	chr1	10306465	10306757	+	293	0	0	0	0	0	0	0	0	0	0	0	0	0	0	0	0	0	0	0	0	0	0	0	0	0	0	0	0	0	0	0	0	0	0	0	0	0	0	0	0	0	0	0	0
ENSG00000284735.1	chr1;chr1;chr1;chr1;chr1;chr1	10381906;10381978;10382236;10384628;10386103;10386239	10382001;10382024;10383105;10384971;10387150;10386541	-;-;-;-;-;-	2381	25	35	13	43	37	63	36	70	54	51	77	47	0	30	38	157	66	3	3	3	85	57	75	9	27	24	27	52	88	61	10	36	64	37	21	14	65	35	27	112	10	17	26	22
ENSG00000284642.1	chr1;chr1;chr1;chr1;chr1;chr1;chr1;chr1	10395416;10395618;10395783;10395851;10396238;10396823;10396823;10396833	10395523;10396376;10396370;10396041;10396376;10397376;10397432;10397363	+;+;+;+;+;+;+;+	1477	5	0	4	16	47	4	7	37	3	4	54	18	0	26	1	19	21	4	20	10	23	15	49	1	4	16	38	16	29	4	24	18	15	26	23	34	59	12	0	6	31	8	0	5
ENSG00000142657.21	chr1;chr1;chr1;chr1;chr1;chr1;chr1;chr1;chr1;chr1;chr1;chr1;chr1;chr1;chr1;chr1;chr1;chr1;chr1;chr1;chr1;chr1;chr1;chr1;chr1;chr1;chr1;chr1;chr1;chr1;chr1;chr1;chr1;chr1;chr1;chr1;chr1;chr1;chr1;chr1;chr1;chr1;chr1;chr1;chr1;chr1;chr1;chr1;chr1;chr1;chr1;chr1;chr1;chr1	10398592;10399044;10399064;10399073;10399112;10399498;10399629;10399629;10399629;10399629;10399629;10399632;10400376;10400393;10400393;10400393;10400393;10403071;10403071;10403071;10403071;10404161;10404161;10404161;10404161;10404161;10408071;10408071;10408071;10408071;10411418;10411418;10411418;10411418;10412834;10413062;10413062;10413062;10415292;10416987;10416987;10416987;10416987;10417376;104…	10398751;10399125;10399125;10399125;10399125;10399704;10399704;10399704;10400008;10399704;10399704;10399704;10400572;10400572;10400572;10400572;10400572;10403136;10403136;10403136;10403136;10404279;10404279;10404276;10404279;10404279;10408140;10408140;10408140;10408140;10411552;10411552;10411552;10411552;10413251;10413251;10413251;10413251;10415392;10417117;10417044;10417117;10417117;10417509;104…	+;+;+;+;+;+;+;+;+;+;+;+;+;+;+;+;+;+;+;+;+;+;+;+;+;+;+;+;+;+;+;+;+;+;+;+;+;+;+;+;+;+;+;+;+;+;+;+;+;+;+;+;+;+	3333	239	361	188	728	1319	2187	709	314	479	221	1129	999	91	1116	529	392	154	694	753	795	548	981	339	130	1612	567	410	398	373	636	967	565	1345	659	232	870	305	238	224	901	835	682	388	420
ENSG00000271989.1	chr1	10429881	10430677	-	797	0	0	0	0	0	0	0	0	0	0	0	0	0	0	0	0	0	0	0	0	4	0	4	1	1	0	0	0	0	0	0	0	0	0	0	0	0	0	0	0	0	0	0	0
ENSG00000251503.8	chr1;chr1;chr1;chr1;chr1;chr1;chr1;chr1;chr1;chr1;chr1;chr1;chr1;chr1;chr1;chr1;chr1;chr1;chr1;chr1;chr1;chr1	10430102;10430384;10430435;10430804;10431258;10433842;10433842;10433842;10434657;10434657;10434657;10434657;10440347;10440347;10440347;10440347;10442265;10451377;10451377;10451377;10451377;10451377	10430568;10430568;10430568;10431401;10431401;10433965;10433965;10433965;10434690;10434690;10434690;10434690;10440413;10440413;10440413;10440413;10442441;10451659;10452003;10451659;10451411;10452153	+;+;+;+;+;+;+;+;+;+;+;+;+;+;+;+;+;+;+;+;+;+	2244	0	0	0	0	0	0	0	0	0	0	0	0	0	2	0	0	0	0	0	0	2	0	1	0	0	0	0	9	0	0	0	0	0	0	0	0	0	0	0	0	0	0	0	0
ENSG00000175279.22	chr1;chr1;chr1;chr1;chr1;chr1;chr1;chr1;chr1;chr1;chr1;chr1;chr1;chr1;chr1;chr1;chr1	10430433;10430512;10430783;10430876;10431123;10433842;10433842;10434657;10434657;10440123;10440347;10440347;10440347;10442265;10442265;10442265;10442265	10430568;10430568;10431401;10431130;10431401;10433965;10433965;10434690;10434690;10440413;10440413;10440413;10440413;10442502;10442334;10442657;10442808	+;+;+;+;+;+;+;+;+;+;+;+;+;+;+;+;+	1748	1	0	2	8	33	14	1	15	0	0	10	9	0	13	22	0	6	0	1	0	11	13	12	0	58	0	0	2	7	21	5	0	5	0	8	2	26	4	0	2	1	10	4	7
ENSG00000241563.4	chr1;chr1	10450031;10451377	10450322;10451998	+;+	914	6	0	0	1	6	0	0	12	0	3	1	0	7	10	0	14	20	43	4	10	29	0	41	2	0	7	6	2	13	0	7	0	2	1	6	5	10	0	11	28	5	4	1	0
ENSG00000160049.12	chr1;chr1;chr1;chr1;chr1;chr1;chr1;chr1;chr1;chr1;chr1;chr1;chr1;chr1;chr1;chr1	10456522;10461643;10462468;10462988;10463058;10463431;10463431;10467190;10467190;10467190;10469177;10469177;10469177;10472323;10472323;10472323	10461702;10461702;10463209;10463209;10463209;10463620;10463620;10467332;10467332;10467332;10469338;10469338;10469338;10472479;10472488;10472529	-;-;-;-;-;-;-;-;-;-;-;-;-;-;-;-	6625	306	254	176	357	585	507	526	301	376	280	571	545	78	567	583	254	177	307	226	261	310	380	160	102	492	365	377	335	431	272	450	429	485	371	286	333	240	250	278	798	372	380	402	301
ENSG00000203469.2	chr1;chr1	10458555;10459090	10458772;10459338	+;+	467	0	0	0	0	0	0	0	0	0	0	0	0	0	0	0	0	0	0	0	0	0	0	0	0	0	0	0	0	0	0	0	0	0	0	0	0	0	0	0	0	0	0	0	0
ENSG00000142655.13	chr1;chr1;chr1;chr1;chr1;chr1;chr1;chr1;chr1;chr1;chr1;chr1;chr1;chr1;chr1;chr1;chr1;chr1;chr1;chr1;chr1	10472288;10474950;10474982;10495274;10495274;10495274;10517028;10535888;10536213;10536213;10536213;10536213;10599238;10599238;10618332;10618332;10623019;10623019;10624340;10627272;10629531	10472580;10475002;10475002;10495321;10495321;10495321;10517131;10536060;10536289;10536297;10536297;10536572;10599366;10599366;10618417;10618417;10623286;10623121;10624437;10627363;10630758	+;+;+;+;+;+;+;+;+;+;+;+;+;+;+;+;+;+;+;+;+	2932	258	29	49	137	346	317	271	220	303	174	336	238	44	339	271	240	217	165	209	253	327	241	405	112	242	229	252	209	237	242	254	137	251	170	147	152	264	138	179	450	171	187	246	176
ENSG00000287727.1	chr1;chr1	10612222;10616369	10615013;10616452	-;-	2876	78	3	24	58	84	51	60	96	46	21	63	90	38	112	42	99	98	46	55	41	113	51	104	16	100	37	78	69	43	58	94	59	63	69	49	57	54	50	20	101	7	29	34	28
ENSG00000243267.3	chr1	10616836	10617115	+	280	5	0	1	0	15	13	13	24	6	24	1	4	0	14	2	32	16	0	6	14	12	0	41	0	0	1	37	2	32	2	9	3	36	19	2	3	16	1	0	21	2	9	22	1
ENSG00000130940.15	chr1;chr1;chr1;chr1;chr1;chr1;chr1;chr1;chr1;chr1;chr1;chr1;chr1;chr1;chr1;chr1;chr1;chr1;chr1;chr1;chr1;chr1;chr1;chr1;chr1;chr1;chr1;chr1;chr1;chr1;chr1;chr1;chr1;chr1;chr1;chr1;chr1;chr1;chr1;chr1;chr1;chr1;chr1;chr1;chr1;chr1;chr1;chr1;chr1;chr1;chr1;chr1;chr1;chr1;chr1;chr1;chr1;chr1;chr1;chr1;chr1	10636604;10637121;10638715;10642082;10642859;10642859;10643160;10643160;10644917;10644917;10646128;10647213;10647801;10649070;10649070;10649283;10649283;10650484;10650692;10650692;10650941;10650941;10650941;10652984;10653377;10653377;10654419;10654419;10654419;10655649;10655649;10655649;10656646;10656646;10656646;10658007;10658508;10658508;10658508;10659702;10659702;10659702;10659702;10660737;106…	10640059;10637408;10638763;10642322;10643000;10643000;10643311;10643311;10645076;10645088;10646326;10648139;10648139;10649192;10649192;10649437;10649437;10650755;10650755;10650755;10651076;10651100;10651076;10654218;10654218;10654218;10654591;10654591;10654591;10655813;10655813;10655813;10656736;10656736;10656736;10658576;10658576;10658576;10658576;10661398;10660536;10660536;10660536;10660856;106…	-;-;-;-;-;-;-;-;-;-;-;-;-;-;-;-;-;-;-;-;-;-;-;-;-;-;-;-;-;-;-;-;-;-;-;-;-;-;-;-;-;-;-;-;-;-;-;-;-;-;-;-;-;-;-;-;-;-;-;-;-	11336	1756	124	823	738	2502	2629	2012	628	2279	1027	4770	979	531	4697	1201	861	346	978	1548	691	468	1187	591	193	420	1647	1478	918	2620	1086	1127	427	757	1009	690	1584	845	684	803	2117	1292	1035	1716	1725
ENSG00000272078.1	chr1;chr1	10639241;10647248	10640077;10654333	+;+	7923	216	7	121	115	357	378	299	174	410	118	728	153	76	737	196	240	80	170	215	81	100	151	186	21	47	173	191	213	537	209	130	68	165	142	161	211	222	147	92	313	287	201	221	273
ENSG00000225158.2	chr1	10895761	10895998	+	238	0	0	0	0	0	0	0	7	0	0	0	0	0	0	0	0	0	0	0	0	1	0	0	0	0	0	0	0	0	0	0	4	0	0	0	0	10	0	0	0	0	0	0	0
ENSG00000175262.14	chr1;chr1;chr1;chr1;chr1;chr1;chr1;chr1;chr1;chr1;chr1;chr1;chr1;chr1;chr1;chr1;chr1;chr1;chr1;chr1;chr1;chr1;chr1;chr1;chr1;chr1;chr1;chr1;chr1;chr1;chr1;chr1;chr1;chr1;chr1;chr1;chr1	10946471;10946473;10946473;10946475;10946730;10947643;10947643;10947643;10947643;10947643;10949624;10949624;10949702;10954019;10954019;10954019;10954990;10954990;10954990;10957023;10957023;10957585;10957616;10957616;10958714;10958714;10958714;10964128;10964128;10964128;10966358;10966358;10969970;10969970;10976156;10976156;10982012	10946738;10946741;10946741;10946586;10946741;10948844;10947870;10948844;10948844;10949751;10949814;10949814;10949814;10954142;10954142;10954142;10955186;10955186;10955186;10957107;10957107;10957753;10957753;10957753;10958752;10958752;10958752;10964271;10964271;10964201;10966482;10966482;10970089;10970089;10976215;10976256;10982037	-;-;-;-;-;-;-;-;-;-;-;-;-;-;-;-;-;-;-;-;-;-;-;-;-;-;-;-;-;-;-;-;-;-;-;-;-	3573	23	0	8	6	6	19	1	164	18	0	23	17	5	31	5	39	154	3	5	22	254	5	328	8	0	2	76	11	43	3	10	23	9	44	34	8	174	11	14	7	9	2	2	18
ENSG00000215785.2	chr1;chr1	10990978;10991418	10991091;10991797	-;-	494	0	0	1	0	0	2	0	42	0	0	6	5	0	0	0	14	18	0	0	1	27	0	41	0	0	0	6	0	4	0	0	0	0	0	5	0	29	0	0	3	0	0	0	12
ENSG00000120948.18	chr1;chr1;chr1;chr1;chr1;chr1;chr1;chr1;chr1;chr1;chr1;chr1;chr1;chr1;chr1;chr1;chr1;chr1;chr1;chr1;chr1;chr1;chr1;chr1;chr1;chr1;chr1;chr1;chr1;chr1;chr1;chr1;chr1;chr1;chr1;chr1;chr1;chr1;chr1;chr1;chr1;chr1;chr1;chr1;chr1;chr1;chr1;chr1;chr1;chr1;chr1;chr1;chr1;chr1;chr1;chr1;chr1;chr1;chr1;chr1;chr1;chr1;chr1;chr1;chr1;chr1;chr1;chr1;chr1;chr1;chr1;chr1;chr1;chr1;chr1;chr1;chr1;chr1;chr1;chr1…	11012344;11012424;11012425;11012622;11012653;11012654;11012654;11012654;11012654;11012670;11013716;11013716;11013716;11013716;11013716;11013716;11013716;11013716;11013716;11013716;11013716;11013716;11013728;11013728;11013728;11013728;11015524;11016123;11016844;11016844;11016844;11016844;11016844;11016844;11016844;11016844;11016844;11016844;11016844;11016844;11016844;11016844;11016844;11016859;110…	11012428;11012480;11012606;11012743;11012743;11012743;11012743;11012743;11012743;11012743;11013965;11013965;11013965;11013965;11013965;11013965;11013965;11013965;11013965;11013965;11013965;11013965;11013965;11013965;11013965;11013965;11015646;11016254;11017007;11017007;11017007;11016861;11017007;11017007;11017007;11017007;11017007;11017007;11017007;11017007;11017007;11017007;11017007;11017007;110…	+;+;+;+;+;+;+;+;+;+;+;+;+;+;+;+;+;+;+;+;+;+;+;+;+;+;+;+;+;+;+;+;+;+;+;+;+;+;+;+;+;+;+;+;+;+;+;+;+;+;+;+;+;+;+;+;+;+;+;+;+;+;+;+;+;+;+;+;+;+;+;+;+;+;+;+;+;+;+;+;+;+;+;+;+;+;+;+;+;+;+;+;+;+;+;+;+;+;+;+;+;+;+;+;+;+;+;+;+;+;+;+;+;+;+;+;+;+;+;+;+;+;+;+;+;+;+;+;+;+;+;+;+;+;+;+;+;+;+;+;+;+;+;+;+;+;+;+;+;+;+;+;+;+;+	5317	458	269	357	481	1078	848	808	183	698	322	610	715	224	1199	837	364	189	691	407	650	357	541	93	146	1045	415	398	859	438	526	707	513	824	590	314	667	162	249	340	757	565	503	533	609
ENSG00000277726.4	chr1;chr1;chr1;chr1;chr1;chr1;chr1;chr1;chr1;chr1;chr1;chr1;chr1;chr1;chr1;chr1;chr1;chr1;chr1;chr1;chr1;chr1;chr1;chr1	11012662;11013716;11016844;11018733;11020429;11020506;11022124;11022124;11022144;11023193;11023193;11023198;11024064;11024793;11025110;11025110;11025110;11025110;11029687;11030179;11030179;11030179;11030179;11030179	11012743;11013965;11017007;11018873;11020599;11020599;11022241;11022250;11022250;11023329;11023329;11023329;11024335;11025208;11025208;11025208;11025208;11025208;11029781;11030497;11030525;11030526;11030430;11030528	+;+;+;+;+;+;+;+;+;+;+;+;+;+;+;+;+;+;+;+;+;+;+;+	2205	0	0	0	0	0	0	0	0	0	0	0	0	0	0	0	15	0	0	0	0	0	0	0	0	0	0	0	0	0	0	0	0	0	0	0	0	0	0	0	0	0	0	0	0
ENSG00000009724.17	chr1;chr1;chr1;chr1;chr1;chr1;chr1;chr1;chr1;chr1;chr1;chr1;chr1;chr1;chr1;chr1;chr1;chr1;chr1;chr1;chr1	11026523;11030176;11030748;11034828;11037693;11037693;11042875;11042875;11043339;11044798;11044798;11045408;11045408;11046556;11046556;11046891;11046891;11046891;11047203;11047203;11047203	11027648;11030250;11030882;11034906;11037811;11037811;11043198;11043022;11043535;11044953;11046733;11045539;11045539;11046733;11046733;11047119;11047119;11047119;11047227;11047233;11047239	-;-;-;-;-;-;-;-;-;-;-;-;-;-;-;-;-;-;-;-;-	4257	52	23	59	46	263	91	68	88	192	27	54	105	21	229	128	131	117	79	23	40	158	23	186	18	64	8	52	130	108	147	11	86	48	118	129	38	85	57	56	192	145	100	39	58
ENSG00000271895.2	chr1;chr1;chr1	11029659;11029758;11029902	11030528;11029781;11030528	+;+;+	870	0	0	5	16	21	4	22	11	44	1	10	7	0	34	30	22	7	0	1	0	14	20	7	5	22	20	1	11	23	12	2	6	6	17	16	9	10	3	12	25	28	30	5	8
ENSG00000116649.10	chr1;chr1;chr1;chr1;chr1;chr1;chr1;chr1;chr1;chr1;chr1;chr1;chr1;chr1;chr1;chr1;chr1;chr1;chr1;chr1;chr1;chr1;chr1	11054584;11054589;11054664;11054962;11054962;11055781;11055781;11056011;11056011;11056011;11056604;11056604;11056604;11056702;11058710;11058800;11058800;11058800;11059225;11059225;11059225;11059777;11059777	11054885;11054885;11055084;11055084;11055204;11055926;11055820;11056094;11056094;11056094;11056757;11056757;11056757;11056757;11058873;11058892;11058892;11058892;11059686;11059380;11059345;11060020;11060018	-;-;-;-;-;-;-;-;-;-;-;-;-;-;-;-;-;-;-;-;-;-;-	1894	161	87	92	111	437	514	209	69	204	207	521	203	63	243	221	143	76	154	163	394	161	226	138	118	297	183	202	127	134	184	114	233	261	204	100	210	110	123	158	280	180	599	135	132
ENSG00000171824.14	chr1;chr1;chr1;chr1;chr1;chr1;chr1;chr1;chr1;chr1;chr1;chr1;chr1;chr1;chr1;chr1;chr1;chr1;chr1;chr1;chr1;chr1;chr1;chr1;chr1;chr1;chr1;chr1;chr1;chr1;chr1;chr1;chr1;chr1;chr1;chr1;chr1;chr1;chr1;chr1;chr1;chr1;chr1;chr1;chr1;chr1;chr1;chr1;chr1;chr1;chr1;chr1;chr1;chr1;chr1;chr1;chr1;chr1;chr1;chr1;chr1;chr1;chr1;chr1;chr1;chr1;chr1;chr1;chr1;chr1;chr1;chr1;chr1;chr1;chr1;chr1;chr1;chr1;chr1;chr1…	11066618;11066618;11066621;11066685;11068008;11068008;11068008;11068008;11068645;11068645;11068645;11068645;11068645;11068654;11069559;11069559;11069559;11069559;11069559;11070900;11070900;11070900;11070900;11070900;11072087;11072087;11072087;11072087;11073934;11073934;11074231;11074231;11074231;11074288;11076842;11076842;11076842;11076842;11077009;11077330;11077365;11077365;11077601;11077601;110…	11066748;11066748;11066748;11066748;11068084;11068084;11068084;11068084;11068924;11068706;11068706;11068706;11068706;11068706;11069730;11069730;11069730;11069730;11069730;11070973;11073026;11070988;11070973;11070973;11072395;11072171;11072171;11072171;11074008;11074008;11074326;11074326;11074326;11074326;11076948;11077651;11076948;11076948;11077443;11077443;11077443;11077443;11077651;11077651;110…	-;-;-;-;-;-;-;-;-;-;-;-;-;-;-;-;-;-;-;-;-;-;-;-;-;-;-;-;-;-;-;-;-;-;-;-;-;-;-;-;-;-;-;-;-;-;-;-;-;-;-;-;-;-;-;-;-;-;-;-;-;-;-;-;-;-;-;-;-;-;-;-;-;-;-;-;-;-;-;-;-;-;-;-;-;-;-;-;-	5991	629	254	252	444	889	901	739	348	899	318	851	573	63	770	616	515	212	615	463	688	485	607	305	180	963	618	639	711	492	505	1048	653	856	657	315	610	368	528	546	737	404	588	656	394
ENSG00000226849.1	chr1;chr1	11068471;11070659	11068713;11073097	+;+	2682	10	0	1	5	27	0	2	21	10	2	14	25	0	6	5	2	21	8	9	1	23	11	10	3	2	7	1	7	5	7	25	4	14	6	7	17	5	4	8	8	1	5	1	13
ENSG00000230337.1	chr1;chr1;chr1;chr1	11099675;11099675;11101801;11101801	11099814;11099910;11102100;11102051	+;+;+;+	536	0	0	5	0	0	17	0	18	2	20	4	0	0	0	0	2	13	3	0	0	47	0	23	0	0	0	10	0	0	0	0	0	0	7	18	7	38	0	0	19	0	2	0	0
ENSG00000198793.13	chr1;chr1;chr1;chr1;chr1;chr1;chr1;chr1;chr1;chr1;chr1;chr1;chr1;chr1;chr1;chr1;chr1;chr1;chr1;chr1;chr1;chr1;chr1;chr1;chr1;chr1;chr1;chr1;chr1;chr1;chr1;chr1;chr1;chr1;chr1;chr1;chr1;chr1;chr1;chr1;chr1;chr1;chr1;chr1;chr1;chr1;chr1;chr1;chr1;chr1;chr1;chr1;chr1;chr1;chr1;chr1;chr1;chr1;chr1;chr1;chr1;chr1;chr1;chr1;chr1;chr1;chr1;chr1;chr1;chr1;chr1;chr1;chr1;chr1;chr1;chr1;chr1;chr1;chr1;chr1…	11106535;11106535;11107285;11107307;11108181;11108181;11108181;11108181;11109290;11109290;11109290;11109290;11109303;11109649;11109649;11109649;11109649;11109649;11111514;11112852;11112852;11112852;11112852;11112852;11114318;11114318;11114318;11114318;11114318;11114813;11114813;11114813;11114813;11115396;11115396;11115396;11115396;11117004;11117004;11121246;11121246;11121979;11121979;11124498;111…	11107500;11107500;11107500;11107500;11108286;11108286;11108286;11108286;11109370;11109370;11109370;11109370;11109370;11109729;11109729;11109729;11109729;11109729;11111753;11112917;11112917;11112917;11112917;11112917;11114453;11114453;11114629;11114453;11114453;11114887;11114887;11114887;11114887;11115663;11115527;11115468;11115468;11117086;11117086;11121368;11121368;11122126;11122126;11124633;111…	-;-;-;-;-;-;-;-;-;-;-;-;-;-;-;-;-;-;-;-;-;-;-;-;-;-;-;-;-;-;-;-;-;-;-;-;-;-;-;-;-;-;-;-;-;-;-;-;-;-;-;-;-;-;-;-;-;-;-;-;-;-;-;-;-;-;-;-;-;-;-;-;-;-;-;-;-;-;-;-;-;-;-;-;-;-;-;-;-;-;-;-;-;-;-;-;-;-;-;-;-;-;-;-;-;-	12163	1219	378	581	903	1623	2043	1468	988	1072	913	1717	1493	241	2114	1724	985	672	1080	942	1456	1525	1194	933	414	2003	1086	1129	1095	1073	1134	1465	1224	1704	1233	613	1561	830	779	890	1890	981	1196	1348	795
ENSG00000225602.5	chr1;chr1;chr1;chr1;chr1;chr1;chr1;chr1	11143898;11144424;11144667;11144667;11145153;11145153;11149270;11149270	11143987;11144481;11144886;11144886;11145279;11145279;11149537;11149537	+;+;+;+;+;+;+;+	763	24	5	7	46	12	10	10	28	3	14	19	44	14	27	63	46	37	20	10	0	35	24	17	5	50	2	28	51	12	4	3	4	27	2	23	27	22	22	0	48	17	15	4	17
ENSG00000253086.1	chr1	11152350	11152452	+	103	9	2	1	1	30	0	0	4	16	0	3	1	0	30	4	1	0	1	0	4	8	1	3	3	5	1	2	3	7	0	2	3	1	4	2	1	1	4	1	3	3	9	7	1
ENSG00000171819.5	chr1;chr1;chr1;chr1;chr1;chr1;chr1;chr1	11189355;11192270;11193580;11193627;11194461;11194526;11194854;11194854	11189955;11192370;11193774;11193774;11194659;11194659;11195981;11195178	+;+;+;+;+;+;+;+	2224	47	62	44	43	60	76	85	100	31	109	62	40	10	53	96	95	30	89	57	33	103	32	171	13	121	65	142	103	74	119	28	70	90	83	60	54	62	39	40	61	55	56	51	54
ENSG00000207451.1	chr1	11226254	11226360	+	107	1	0	0	0	0	0	0	2	0	0	0	0	0	0	0	0	0	2	0	1	0	0	0	0	0	0	0	0	12	0	0	0	1	0	0	0	0	0	0	0	0	0	0	0
ENSG00000238173.1	chr1	11232963	11233112	+	150	0	0	0	3	0	11	0	31	9	0	0	0	6	0	0	0	13	0	5	0	26	0	31	5	8	0	2	0	0	4	0	1	8	0	5	6	5	0	1	6	8	0	5	3
ENSG00000120942.14	chr1;chr1;chr1;chr1;chr1;chr1;chr1;chr1;chr1;chr1;chr1;chr1	11273198;11273528;11273889;11273934;11285644;11285644;11285644;11292049;11293467;11294873;11294873;11294873	11274060;11274060;11274060;11274060;11285732;11288434;11285732;11292147;11293626;11296049;11295164;11295183	+;+;+;+;+;+;+;+;+;+;+;+	5090	136	125	38	110	334	186	157	182	76	93	326	144	13	189	181	298	98	227	55	161	291	198	314	68	142	117	97	72	145	143	308	125	146	120	118	118	258	128	183	252	125	196	117	210
ENSG00000238199.1	chr1;chr1	11278616;11279168	11278868;11279351	-;-	437	5	5	1	5	5	16	8	12	1	0	2	3	0	1	43	0	7	6	17	1	6	4	21	0	8	5	3	6	23	8	2	1	0	0	20	9	7	0	4	4	3	0	0	9
ENSG00000284646.1	chr1;chr1;chr1;chr1	11311734;11312256;11314605;11319007	11311969;11312403;11314875;11319093	-;-;-;-	742	0	0	0	3	1	0	3	47	0	0	0	4	0	1	0	20	34	0	0	0	50	10	72	0	5	1	8	0	18	0	0	0	0	5	3	0	48	0	10	2	1	0	3	2
ENSG00000224338.2	chr1	11425257	11425821	-	565	0	0	0	0	0	0	0	10	0	0	0	0	0	0	0	4	22	0	0	0	7	0	14	0	0	0	3	0	0	0	0	0	0	1	0	0	8	0	0	0	0	0	0	0
ENSG00000204624.8	chr1;chr1;chr1;chr1;chr1;chr1;chr1;chr1;chr1;chr1;chr1;chr1;chr1;chr1;chr1;chr1;chr1;chr1;chr1;chr1;chr1;chr1;chr1;chr1;chr1;chr1;chr1;chr1	11479155;11479166;11481258;11500990;11502678;11514390;11515369;11516001;11517463;11519355;11519719;11520687;11523942;11525176;11526651;11529556;11529787;11530907;11531565;11533676;11534381;11534381;11535011;11535011;11535478;11535478;11536324;11536324	11479372;11479372;11481960;11502088;11502897;11514526;11515503;11516161;11517602;11519503;11519880;11520848;11524055;11525312;11526835;11529686;11529959;11531033;11531710;11533827;11534540;11534540;11535124;11535124;11535644;11535644;11537225;11537551	+;+;+;+;+;+;+;+;+;+;+;+;+;+;+;+;+;+;+;+;+;+;+;+;+;+;+;+	6120	1	0	14	0	0	24	0	101	4	0	108	0	15	134	40	149	100	2	25	0	158	3	352	13	1	15	19	17	41	0	67	31	3	25	12	42	216	20	3	11	0	21	9	71
ENSG00000285833.1	chr1;chr1	11500803;11501551	11501387;11502016	-;-	1051	0	0	0	0	0	0	0	1	0	0	0	0	0	0	0	0	0	0	0	0	6	0	6	0	0	0	0	0	0	0	0	0	0	0	0	0	2	0	0	0	0	0	0	0
ENSG00000235643.2	chr1;chr1;chr1	11609468;11611843;11612790	11610113;11611978;11613358	+;+;+	1351	1	0	0	3	0	0	0	52	0	0	0	0	0	3	0	25	18	1	2	0	50	0	97	0	4	0	5	1	6	0	1	0	1	17	4	0	60	0	1	0	1	0	2	0
ENSG00000284708.1	chr1;chr1	11623558;11641376	11623610;11643416	+;+	2094	1	0	0	17	29	24	9	60	14	0	43	4	9	54	57	32	48	1	3	14	44	14	121	13	0	1	44	12	11	15	10	4	20	10	8	1	113	0	1	19	0	1	9	13
ENSG00000116661.11	chr1;chr1;chr1;chr1;chr1;chr1;chr1;chr1;chr1;chr1;chr1;chr1;chr1;chr1;chr1;chr1;chr1;chr1;chr1;chr1;chr1;chr1;chr1;chr1	11637018;11645050;11648092;11648387;11649087;11649087;11649528;11649779;11649779;11649874;11649945;11649945;11649945;11650466;11650466;11650466;11650466;11650547;11650737;11653391;11653391;11654031;11654319;11655640	11637669;11645205;11648828;11648828;11649225;11649225;11649874;11649874;11649874;11650074;11650074;11650074;11650074;11650713;11650834;11650834;11650770;11650834;11650834;11653529;11653427;11654197;11654429;11655785	-;-;-;-;-;-;-;-;-;-;-;-;-;-;-;-;-;-;-;-;-;-;-;-	3163	23	16	4	27	240	115	57	98	20	20	677	56	20	331	91	88	76	4	6	25	124	121	165	4	66	27	76	103	41	59	31	21	56	53	50	1	91	19	4	407	88	28	176	74
ENSG00000132879.14	chr1;chr1;chr1;chr1;chr1;chr1;chr1;chr1;chr1;chr1;chr1;chr1;chr1;chr1;chr1;chr1;chr1;chr1;chr1;chr1;chr1;chr1;chr1;chr1;chr1;chr1;chr1;chr1;chr1;chr1;chr1;chr1;chr1;chr1;chr1;chr1;chr1;chr1;chr1;chr1;chr1;chr1;chr1;chr1;chr1;chr1;chr1;chr1;chr1;chr1;chr1	11654375;11654857;11654857;11654877;11654881;11654910;11654910;11655328;11655328;11655670;11655806;11655806;11655806;11655806;11655806;11655806;11655806;11656065;11658267;11658267;11658267;11658267;11658267;11658267;11658267;11658267;11658533;11658533;11658533;11658542;11658736;11658736;11658736;11658736;11658736;11658736;11658736;11658736;11658736;11661130;11661130;11661130;11661130;11661130;116…	11654581;11654952;11654952;11654952;11654952;11654952;11654952;11655699;11655699;11655699;11656100;11656100;11656100;11656100;11656100;11656100;11656100;11656100;11658364;11658364;11658364;11658364;11658393;11658393;11658364;11658364;11658628;11658628;11658628;11658628;11658871;11658871;11658871;11658871;11658871;11658871;11658871;11658868;11658871;11661308;11662291;11661308;11661349;11661391;116…	+;+;+;+;+;+;+;+;+;+;+;+;+;+;+;+;+;+;+;+;+;+;+;+;+;+;+;+;+;+;+;+;+;+;+;+;+;+;+;+;+;+;+;+;+;+;+;+;+;+;+	3527	205	38	34	157	320	264	310	150	264	197	654	238	118	400	167	118	120	134	97	216	172	336	106	37	136	206	211	244	145	121	263	128	295	221	142	186	173	134	124	281	168	227	366	265
ENSG00000116663.11	chr1;chr1;chr1;chr1;chr1;chr1;chr1;chr1;chr1;chr1;chr1;chr1;chr1;chr1	11664200;11664486;11668656;11668656;11668696;11671266;11671266;11671266;11671928;11671928;11673277;11673277;11673615;11673615	11664255;11664735;11668944;11668944;11668944;11671392;11671392;11671392;11672064;11672023;11673412;11673412;11674030;11674354	+;+;+;+;+;+;+;+;+;+;+;+;+;+	1735	88	16	21	40	61	174	83	40	48	29	227	94	13	99	117	59	47	87	28	121	101	92	36	12	125	54	49	38	42	61	123	49	97	122	44	54	44	25	51	243	50	93	92	69
ENSG00000116670.15	chr1;chr1;chr1;chr1;chr1;chr1;chr1;chr1;chr1;chr1;chr1;chr1;chr1;chr1;chr1;chr1;chr1;chr1;chr1;chr1;chr1;chr1;chr1;chr1;chr1;chr1;chr1;chr1;chr1;chr1;chr1;chr1;chr1;chr1;chr1;chr1;chr1;chr1;chr1;chr1;chr1;chr1;chr1;chr1;chr1;chr1;chr1;chr1;chr1;chr1;chr1;chr1;chr1;chr1;chr1;chr1;chr1;chr1;chr1;chr1;chr1;chr1;chr1;chr1;chr1;chr1;chr1;chr1;chr1	11674480;11674480;11674525;11674678;11674748;11675082;11675082;11675082;11675082;11675082;11675656;11675657;11675658;11675658;11675658;11675658;11675658;11675700;11676046;11676046;11676046;11676046;11676046;11676046;11676046;11676809;11676809;11676848;11676848;11676848;11676848;11676848;11676848;11676872;11677543;11677543;11677543;11677543;11677543;11677543;11677543;11677543;11680353;11680353;116…	11674816;11674816;11674816;11674816;11674816;11675174;11675174;11675174;11675174;11675174;11675731;11675731;11675731;11675731;11675731;11675731;11675731;11676140;11676140;11676140;11676140;11676140;11676140;11676140;11676140;11676948;11676948;11676948;11676948;11676948;11676948;11676948;11676948;11677614;11677614;11677614;11677614;11677614;11677614;11677614;11677614;11677614;11680471;11680471;116…	-;-;-;-;-;-;-;-;-;-;-;-;-;-;-;-;-;-;-;-;-;-;-;-;-;-;-;-;-;-;-;-;-;-;-;-;-;-;-;-;-;-;-;-;-;-;-;-;-;-;-;-;-;-;-;-;-;-;-;-;-;-;-;-;-;-;-;-;-	3324	57	74	30	84	152	324	146	113	43	75	126	106	29	98	101	92	85	126	45	122	230	104	283	28	260	111	91	53	61	94	167	90	181	55	103	125	108	109	49	405	78	56	91	62
ENSG00000162490.7	chr1;chr1;chr1;chr1;chr1;chr1;chr1	11691710;11706249;11709275;11711851;11712340;11715119;11719584	11691853;11706709;11709465;11711965;11712429;11715208;11725857	+;+;+;+;+;+;+	7365	6	41	9	31	11	42	4	189	9	11	0	9	5	1	7	56	181	6	0	17	245	35	374	2	136	7	40	4	68	1	0	4	13	44	8	17	227	13	11	172	2	16	13	12
ENSG00000177674.16	chr1;chr1;chr1;chr1;chr1;chr1;chr1;chr1;chr1;chr1;chr1;chr1;chr1;chr1;chr1;chr1;chr1;chr1;chr1;chr1;chr1;chr1;chr1;chr1;chr1;chr1;chr1;chr1;chr1;chr1;chr1;chr1;chr1;chr1;chr1;chr1;chr1;chr1;chr1;chr1;chr1;chr1;chr1;chr1;chr1;chr1;chr1;chr1;chr1;chr1;chr1;chr1;chr1;chr1;chr1;chr1;chr1;chr1;chr1;chr1;chr1;chr1;chr1;chr1;chr1;chr1;chr1;chr1	11736084;11736117;11736124;11736130;11736136;11736142;11736147;11736153;11736173;11736175;11744533;11745801;11745803;11745803;11745803;11745803;11745803;11745803;11745803;11745803;11745803;11745930;11745988;11745998;11746009;11746127;11746127;11746127;11746127;11747440;11747440;11747440;11747440;11747440;11747440;11747440;11747440;11747440;11747440;11747440;11747512;11748415;11748415;11748415;117…	11736235;11736235;11736235;11736235;11736235;11736235;11736235;11736235;11736235;11736235;11744568;11745837;11745837;11745837;11745837;11745837;11745837;11745837;11746672;11745837;11745837;11746223;11746223;11746223;11746223;11746223;11746223;11746223;11746223;11747545;11747545;11747545;11747545;11747545;11747545;11747545;11747545;11747545;11747545;11747545;11747545;11748610;11748589;11748610;117…	+;+;+;+;+;+;+;+;+;+;+;+;+;+;+;+;+;+;+;+;+;+;+;+;+;+;+;+;+;+;+;+;+;+;+;+;+;+;+;+;+;+;+;+;+;+;+;+;+;+;+;+;+;+;+;+;+;+;+;+;+;+;+;+;+;+;+;+	2435	153	52	68	94	103	244	92	181	103	48	81	103	55	229	73	179	60	89	105	136	270	153	233	50	160	104	100	88	89	146	226	93	167	174	110	130	182	119	97	343	92	168	115	170
ENSG00000215910.7	chr1;chr1;chr1;chr1;chr1;chr1;chr1;chr1;chr1;chr1;chr1;chr1;chr1;chr1;chr1;chr1;chr1;chr1;chr1;chr1;chr1;chr1;chr1;chr1;chr1;chr1;chr1;chr1;chr1;chr1;chr1;chr1;chr1;chr1;chr1;chr1;chr1;chr1;chr1;chr1;chr1;chr1;chr1;chr1;chr1;chr1;chr1;chr1;chr1;chr1;chr1;chr1;chr1;chr1;chr1;chr1;chr1;chr1;chr1;chr1;chr1;chr1;chr1;chr1;chr1;chr1;chr1;chr1;chr1	11761787;11764331;11765857;11766742;11766964;11767221;11767221;11768077;11768077;11768973;11771524;11771524;11772082;11772082;11772122;11775435;11775435;11775435;11776464;11776464;11776464;11777129;11778660;11778660;11778926;11778926;11778931;11779802;11779802;11779802;11779817;11782189;11782189;11782189;11782194;11784174;11784174;11784174;11784174;11785148;11785148;11785148;11785148;11785171;117…	11762274;11764482;11766576;11767085;11767085;11767264;11767264;11768275;11768319;11769127;11771636;11771636;11772259;11772259;11772259;11775610;11775610;11775610;11776638;11776638;11776638;11778310;11778816;11778816;11779080;11779080;11779080;11780010;11780010;11780010;11780010;11782333;11782333;11782333;11782333;11784593;11784593;11784593;11784593;11785289;11785289;11785289;11785289;11785289;117…	+;+;+;+;+;+;+;+;+;+;+;+;+;+;+;+;+;+;+;+;+;+;+;+;+;+;+;+;+;+;+;+;+;+;+;+;+;+;+;+;+;+;+;+;+;+;+;+;+;+;+;+;+;+;+;+;+;+;+;+;+;+;+;+;+;+;+;+;+	6499	19	0	0	0	0	0	1	107	0	30	1	0	0	1	0	69	25	1	0	0	176	6	259	5	0	0	15	0	5	0	0	0	16	1	5	0	139	1	0	765	0	34	13	2
ENSG00000177553.6	chr1;chr1;chr1	11777077;11778645;11779123	11778284;11778807;11779619	-;-;-	1868	0	0	0	0	0	0	0	11	0	0	0	0	0	0	0	1	2	0	0	0	0	0	15	0	0	0	3	0	0	0	0	0	0	0	0	0	1	0	0	69	0	0	2	0
ENSG00000177000.13	chr1;chr1;chr1;chr1;chr1;chr1;chr1;chr1;chr1;chr1;chr1;chr1;chr1;chr1;chr1;chr1;chr1;chr1;chr1;chr1;chr1;chr1;chr1;chr1;chr1;chr1;chr1;chr1;chr1;chr1;chr1;chr1;chr1;chr1;chr1;chr1;chr1;chr1;chr1;chr1;chr1;chr1;chr1;chr1;chr1;chr1;chr1;chr1;chr1;chr1;chr1;chr1;chr1;chr1;chr1;chr1;chr1;chr1;chr1;chr1;chr1;chr1;chr1;chr1;chr1;chr1;chr1;chr1;chr1;chr1;chr1;chr1;chr1;chr1;chr1;chr1;chr1;chr1;chr1;chr1…	11785723;11785723;11785730;11785732;11789766;11790041;11790068;11790068;11790349;11790566;11790642;11791207;11791207;11791207;11791207;11791207;11791207;11791207;11791207;11791207;11791207;11791207;11791637;11792278;11792278;11792278;11792278;11792278;11792278;11792278;11792278;11792278;11792278;11792278;11793907;11793907;11793907;11793907;11793907;11793907;11793907;11793907;11793907;11793907;117…	11790898;11790898;11790898;11790898;11790898;11790716;11790898;11790898;11790716;11790898;11790898;11791326;11791326;11791326;11791326;11791326;11791326;11791326;11791326;11791326;11791326;11791326;11791745;11792379;11792379;11792379;11792379;11792379;11792379;11792379;11792379;11792379;11792379;11792379;11794089;11794089;11794089;11794089;11794089;11794089;11794089;11794089;11794089;11794089;117…	-;-;-;-;-;-;-;-;-;-;-;-;-;-;-;-;-;-;-;-;-;-;-;-;-;-;-;-;-;-;-;-;-;-;-;-;-;-;-;-;-;-;-;-;-;-;-;-;-;-;-;-;-;-;-;-;-;-;-;-;-;-;-;-;-;-;-;-;-;-;-;-;-;-;-;-;-;-;-;-;-;-;-;-;-;-;-;-;-;-;-;-;-;-;-;-;-;-;-;-;-;-;-;-;-;-;-;-;-;-;-;-;-;-;-;-;-;-;-;-;-;-;-;-;-;-;-;-;-;-;-;-;-;-;-;-;-;-;-;-;-;-;-;-;-;-;-;-;-;-;-;-;-	11513	1054	181	211	505	752	595	825	598	697	848	1198	870	211	1119	546	823	375	367	535	532	823	582	744	243	253	499	669	753	691	648	790	796	760	742	705	521	644	566	665	1403	606	609	757	556
ENSG00000011021.23	chr1;chr1;chr1;chr1;chr1;chr1;chr1;chr1;chr1;chr1;chr1;chr1;chr1;chr1;chr1;chr1;chr1;chr1;chr1;chr1;chr1;chr1;chr1;chr1;chr1;chr1;chr1;chr1;chr1;chr1;chr1;chr1;chr1;chr1;chr1;chr1;chr1;chr1;chr1;chr1;chr1;chr1;chr1;chr1;chr1;chr1;chr1;chr1;chr1;chr1;chr1;chr1;chr1;chr1;chr1;chr1;chr1;chr1;chr1;chr1;chr1;chr1;chr1;chr1;chr1;chr1;chr1;chr1;chr1;chr1;chr1;chr1;chr1;chr1;chr1;chr1;chr1;chr1;chr1;chr1…	11806096;11806191;11806213;11806231;11806260;11806263;11806263;11806263;11807131;11807131;11807131;11807131;11807131;11807131;11807131;11807131;11815846;11815846;11815846;11815846;11815846;11815846;11815846;11816615;11816615;11816615;11816615;11816615;11816615;11816615;11816615;11819488;11819488;11819488;11819488;11819488;11819488;11819488;11819488;11820362;11822695;11822695;11822695;11822695;118…	11806349;11806349;11806349;11806349;11806349;11806349;11806349;11806349;11807190;11807190;11807190;11807190;11807190;11807190;11807190;11807190;11815911;11815911;11815911;11815911;11815911;11815911;11815911;11816680;11816680;11816680;11816680;11816680;11816680;11816680;11816680;11819554;11819554;11819554;11819554;11819554;11819554;11819554;11819554;11820779;11822801;11822801;11822801;11822801;118…	+;+;+;+;+;+;+;+;+;+;+;+;+;+;+;+;+;+;+;+;+;+;+;+;+;+;+;+;+;+;+;+;+;+;+;+;+;+;+;+;+;+;+;+;+;+;+;+;+;+;+;+;+;+;+;+;+;+;+;+;+;+;+;+;+;+;+;+;+;+;+;+;+;+;+;+;+;+;+;+;+;+;+;+;+;+;+;+;+;+;+;+;+;+;+;+;+;+;+;+;+;+;+;+;+;+;+;+;+;+;+;+;+;+;+;+;+;+;+;+;+;+;+;+;+;+;+;+;+;+;+;+;+;+;+;+;+;+;+;+;+;+	8173	643	133	129	441	486	380	696	582	650	271	783	604	135	1034	625	696	561	384	251	354	737	438	644	163	409	466	681	561	441	474	337	518	858	484	342	337	455	379	433	504	345	310	631	452
ENSG00000276470.1	chr1	11843812	11843984	+	173	0	0	0	0	0	0	0	0	0	0	0	0	0	0	0	0	0	0	0	0	0	0	0	0	0	0	0	0	0	0	0	0	0	0	0	0	0	0	0	0	0	0	0	0
ENSG00000278852.1	chr1	11845549	11845697	+	149	0	0	0	0	0	0	0	0	0	0	0	0	0	0	0	0	0	0	0	0	0	0	0	0	0	0	0	0	0	0	0	0	0	0	0	0	0	0	0	0	0	0	0	0
ENSG00000175206.10	chr1;chr1;chr1;chr1;chr1;chr1;chr1;chr1;chr1;chr1	11845709;11845712;11845879;11846012;11847113;11847113;11847113;11847562;11847562;11848081	11846014;11846008;11846014;11846014;11847439;11847439;11847439;11847783;11847783;11848345	-;-;-;-;-;-;-;-;-;-	1120	15	0	13	9	1	0	19	37	22	0	19	15	2	2	9	33	8	2	5	0	27	5	45	3	8	8	34	19	11	4	2	14	8	1	12	15	42	14	21	18	4	14	0	0
ENSG00000275915.1	chr1	11847442	11847549	+	108	0	0	0	0	0	0	0	0	0	0	0	0	0	0	0	0	0	0	0	0	0	0	0	0	0	0	0	0	0	0	0	0	0	0	0	0	0	0	0	0	0	0	0	0
ENSG00000120937.9	chr1;chr1;chr1	11857464;11858214;11858702	11857671;11858469;11858945	-;-;-	708	0	0	0	0	0	0	0	20	0	0	0	0	0	0	0	6	3	0	0	0	22	0	26	0	0	0	0	0	1	0	0	0	0	2	0	0	34	0	0	0	0	0	0	0
ENSG00000224904.1	chr1	11877770	11880406	+	2637	0	0	0	0	0	0	0	32	0	1	0	0	1	0	0	18	27	0	0	0	103	0	133	4	1	0	3	0	15	0	0	0	7	15	15	0	101	3	0	0	0	0	0	2
ENSG00000285646.2	chr1;chr1;chr1;chr1;chr1;chr1;chr1;chr1;chr1;chr1;chr1;chr1	11907940;11908147;11908147;11908151;11908152;11908152;11911507;11912702;11912818;11912818;11912818;11912818	11908385;11908385;11908385;11909330;11908385;11908385;11911589;11913226;11914298;11913238;11913323;11913232	+;+;+;+;+;+;+;+;+;+;+;+	3071	5	0	27	33	65	17	24	180	10	57	1	9	0	23	68	69	53	29	2	17	158	13	212	0	41	11	59	19	66	10	10	35	50	55	26	9	131	3	28	0	8	13	9	5
ENSG00000199347.1	chr1	11908152	11908271	+	120	0	0	0	0	0	0	0	0	0	0	0	0	0	0	0	0	0	0	0	0	0	0	0	0	0	0	0	0	0	0	0	0	0	0	0	0	0	0	0	0	0	0	0	0
ENSG00000201801.1	chr1	11909808	11909927	-	120	29	35	85	22	119	53	65	15	27	67	57	80	75	21	41	11	19	62	23	82	16	43	1	48	188	56	48	50	22	51	48	36	51	44	15	65	11	76	25	54	84	140	42	62
ENSG00000116685.16	chr1;chr1;chr1;chr1;chr1;chr1;chr1;chr1;chr1	11919591;11920183;11922175;11922636;11922636;11925205;11925205;11925205;11926303	11920332;11920332;11923489;11923489;11923489;11926269;11926427;11926428;11926403	-;-;-;-;-;-;-;-;-	3281	231	179	45	83	327	420	378	219	178	195	501	302	79	304	165	172	128	152	160	185	216	226	261	81	1078	269	179	199	155	224	351	116	373	229	119	213	168	211	225	230	119	187	266	230
ENSG00000083444.17	chr1;chr1;chr1;chr1;chr1;chr1;chr1;chr1;chr1;chr1;chr1;chr1;chr1;chr1;chr1;chr1;chr1;chr1;chr1;chr1;chr1;chr1;chr1;chr1;chr1;chr1;chr1;chr1;chr1;chr1;chr1;chr1;chr1;chr1;chr1;chr1;chr1;chr1;chr1;chr1;chr1;chr1;chr1;chr1;chr1;chr1;chr1;chr1;chr1;chr1;chr1;chr1;chr1;chr1;chr1;chr1;chr1;chr1;chr1;chr1;chr1;chr1	11934205;11934694;11934717;11934734;11934743;11944522;11947976;11947976;11947976;11947976;11947976;11949773;11949773;11949773;11949773;11949773;11950357;11950357;11950357;11950357;11950357;11952623;11952623;11952623;11952623;11952623;11954301;11954574;11954830;11954830;11954830;11956917;11956917;11956917;11957090;11957842;11957842;11957842;11957842;11958516;11958516;11958516;11960646;11963532;119…	11934323;11934855;11934855;11934855;11934855;11944662;11948067;11948067;11948067;11948067;11948067;11949906;11949906;11949906;11949906;11949906;11950520;11950520;11950520;11950520;11950520;11952735;11952735;11952735;11952691;11952735;11954893;11954767;11954893;11954893;11954893;11957014;11957014;11957014;11957193;11957943;11957943;11957943;11957943;11958593;11958647;11958620;11960767;11963636;119…	+;+;+;+;+;+;+;+;+;+;+;+;+;+;+;+;+;+;+;+;+;+;+;+;+;+;+;+;+;+;+;+;+;+;+;+;+;+;+;+;+;+;+;+;+;+;+;+;+;+;+;+;+;+;+;+;+;+;+;+;+;+	5320	556	585	244	257	602	1477	678	472	510	870	1147	686	239	592	382	745	281	335	426	611	662	701	520	305	3006	567	800	372	274	552	563	671	1307	755	261	488	429	444	400	768	638	569	352	497
ENSG00000287384.1	chr1	11979533	11980127	-	595	0	0	0	0	0	2	2	48	0	0	1	10	6	0	0	17	14	0	0	0	52	1	75	2	0	0	5	13	6	0	0	1	0	0	2	0	48	1	0	2	0	0	5	0
ENSG00000116688.18	chr1;chr1;chr1;chr1;chr1;chr1;chr1;chr1;chr1;chr1;chr1;chr1;chr1;chr1;chr1;chr1;chr1;chr1;chr1;chr1;chr1;chr1;chr1;chr1;chr1;chr1;chr1;chr1;chr1;chr1;chr1;chr1;chr1;chr1;chr1;chr1;chr1;chr1;chr1;chr1;chr1;chr1;chr1;chr1;chr1;chr1;chr1;chr1;chr1;chr1;chr1;chr1;chr1;chr1;chr1;chr1;chr1;chr1;chr1;chr1;chr1;chr1;chr1;chr1;chr1;chr1;chr1;chr1;chr1;chr1;chr1;chr1;chr1;chr1;chr1;chr1;chr1;chr1;chr1;chr1…	11980181;11980189;11980191;11980209;11980209;11980209;11980215;11980215;11980215;11980216;11980237;11980238;11980259;11980259;11980276;11980281;11980299;11980299;11980370;11980435;11980444;11980444;11980444;11980444;11980444;11980444;11980446;11981810;11981810;11981810;11981970;11981970;11981970;11981970;11981970;11981970;11981970;11981970;11981970;11981970;11981970;11981970;11981970;11981970;119…	11980484;11980484;11980484;11980484;11980484;11980484;11980484;11980484;11980484;11980484;11980484;11980484;11980484;11980484;11980484;11980484;11980484;11980484;11980484;11980484;11980484;11980484;11980484;11980484;11980484;11980484;11980484;11982114;11982114;11981853;11982114;11982114;11982114;11982114;11982114;11982114;11982114;11982114;11982114;11982114;11982114;11982114;11982114;11982114;119…	+;+;+;+;+;+;+;+;+;+;+;+;+;+;+;+;+;+;+;+;+;+;+;+;+;+;+;+;+;+;+;+;+;+;+;+;+;+;+;+;+;+;+;+;+;+;+;+;+;+;+;+;+;+;+;+;+;+;+;+;+;+;+;+;+;+;+;+;+;+;+;+;+;+;+;+;+;+;+;+;+;+;+;+;+;+;+;+;+;+;+;+;+;+;+;+;+;+;+;+;+;+;+;+;+;+;+;+;+;+;+;+;+;+;+;+;+;+;+;+;+;+;+;+;+;+;+;+;+;+;+;+;+;+;+;+;+;+;+;+;+;+;+;+;+;+;+;+;+;+;+;+;+;+;+;+;+;+;+;+;+;+;+;+;+;+;+;+;+;+;+;+;+;+;+;+;+;+;+;+;+;+;+;+;+;+;+;+;+;+;+;+;+;+;+;+;+;+;+;+…	10234	804	452	376	826	1507	1662	1223	694	952	816	1981	1152	305	1654	851	873	459	789	763	896	957	1119	629	271	1434	767	996	937	958	945	1134	1090	1340	798	612	1065	592	671	967	1150	846	1309	1204	742
ENSG00000270914.1	chr1	12017216	12017308	-	93	0	0	0	0	0	0	0	7	0	0	0	0	0	0	0	0	0	0	0	0	2	0	9	0	0	0	0	0	0	0	0	0	0	0	0	0	10	0	0	0	0	0	0	0
ENSG00000116691.11	chr1;chr1;chr1;chr1;chr1;chr1;chr1;chr1;chr1;chr1;chr1;chr1;chr1;chr1;chr1;chr1;chr1;chr1;chr1;chr1;chr1;chr1;chr1;chr1;chr1;chr1;chr1;chr1;chr1;chr1;chr1;chr1;chr1;chr1;chr1;chr1;chr1;chr1	12019466;12019498;12021645;12022095;12022095;12022222;12022833;12022833;12022833;12022864;12028721;12029033;12029033;12029033;12029033;12029096;12029223;12029223;12029223;12029223;12029223;12029223;12029765;12029765;12029765;12030028;12030028;12030028;12031127;12031266;12031266;12031266;12031266;12031541;12031722;12031722;12031722;12031722	12019552;12019552;12021840;12022442;12022442;12022442;12022917;12022917;12022917;12022917;12029141;12029141;12029141;12029141;12029141;12029141;12029607;12029281;12029894;12030124;12029281;12029281;12029894;12029894;12029855;12030124;12030124;12030124;12031403;12031403;12031403;12031403;12031403;12032025;12032039;12031975;12032043;12032045	+;+;+;+;+;+;+;+;+;+;+;+;+;+;+;+;+;+;+;+;+;+;+;+;+;+;+;+;+;+;+;+;+;+;+;+;+;+	2821	104	65	28	96	78	168	118	86	215	119	157	127	61	93	112	149	104	94	120	166	127	113	179	46	392	157	127	152	28	98	66	175	209	137	104	169	176	63	81	147	83	213	103	95
ENSG00000202461.1	chr1	12024012	12024124	-	113	0	3	22	31	8	16	10	5	21	1	9	13	3	21	28	0	0	9	5	12	6	1	7	4	40	2	8	0	6	21	2	6	9	4	13	3	1	3	9	9	23	18	7	5
ENSG00000276869.1	chr1	12029158	12029222	+	65	0	0	0	0	0	0	0	0	0	0	0	0	0	0	0	0	1	0	0	12	0	0	3	0	0	0	0	0	0	0	0	0	0	3	0	0	0	0	0	0	0	0	0	0
ENSG00000243539.3	chr1	12036740	12037014	-	275	0	0	0	0	0	0	0	3	0	0	0	0	0	0	0	33	0	0	0	0	5	0	12	0	0	0	0	0	0	0	0	0	0	0	3	0	10	0	0	0	0	1	0	0
ENSG00000120949.15	chr1;chr1;chr1;chr1;chr1;chr1;chr1;chr1;chr1;chr1;chr1;chr1;chr1;chr1;chr1;chr1;chr1;chr1;chr1;chr1;chr1;chr1;chr1;chr1;chr1;chr1;chr1;chr1;chr1;chr1;chr1;chr1;chr1;chr1;chr1;chr1;chr1;chr1;chr1;chr1;chr1;chr1;chr1;chr1;chr1;chr1;chr1;chr1;chr1;chr1;chr1;chr1	12063303;12063377;12063470;12084464;12097101;12097101;12097101;12104379;12104379;12104379;12109566;12109566;12109566;12110041;12110041;12110041;12111898;12111898;12111898;12115577;12115577;12115577;12123284;12123284;12123284;12123715;12123715;12123715;12125899;12125934;12125951;12125951;12125951;12126183;12126183;12126183;12126183;12126183;12135588;12135588;12135588;12135588;12135588;12138229;121…	12063661;12063661;12063661;12084551;12097217;12097217;12097217;12104531;12104531;12104531;12109656;12109656;12109656;12110204;12110204;12110204;12112014;12112014;12112014;12115729;12115729;12115729;12123377;12123377;12123377;12123827;12123827;12123827;12126052;12126052;12126052;12126052;12126052;12126236;12126236;12126236;12126236;12126236;12135613;12135613;12135613;12135613;12135613;12138436;121…	+;+;+;+;+;+;+;+;+;+;+;+;+;+;+;+;+;+;+;+;+;+;+;+;+;+;+;+;+;+;+;+;+;+;+;+;+;+;+;+;+;+;+;+;+;+;+;+;+;+;+;+	3812	12	2	0	5	26	29	3	178	0	21	5	3	0	6	2	61	119	24	24	39	288	14	479	21	29	21	52	20	89	27	15	13	10	21	44	1	265	16	29	2	14	42	12	36
ENSG00000201135.1	chr1	12077881	12077984	-	104	0	0	0	0	0	0	0	13	0	0	0	0	0	0	0	0	2	0	0	0	25	0	17	0	0	0	0	0	0	0	0	0	0	0	0	0	20	0	0	0	0	0	0	0
ENSG00000227875.2	chr1	12080293	12080547	-	255	0	0	0	0	0	0	0	13	0	0	0	0	0	0	0	4	5	0	0	0	2	0	13	0	0	0	0	0	2	0	0	0	0	0	0	0	3	0	0	0	0	0	0	0
ENSG00000285604.1	chr1;chr1;chr1;chr1	12088441;12089020;12091109;12092000	12088752;12089493;12091253;12092264	-;-;-;-	1196	1	0	0	0	0	0	0	38	0	0	0	0	0	0	11	9	14	0	0	10	67	2	52	0	7	0	4	0	9	0	0	4	0	15	0	0	34	0	1	0	0	0	0	0
ENSG00000283789.1	chr1	12166943	12167038	+	96	0	0	0	0	0	0	0	0	0	0	0	0	0	0	0	0	0	0	0	0	0	0	0	0	0	0	0	0	0	0	0	0	0	0	0	0	0	0	0	0	0	0	0	0
ENSG00000028137.19	chr1;chr1;chr1;chr1;chr1;chr1;chr1;chr1;chr1;chr1;chr1;chr1;chr1;chr1;chr1;chr1;chr1;chr1;chr1;chr1;chr1;chr1;chr1;chr1;chr1;chr1;chr1	12166991;12167003;12167003;12188796;12188796;12190957;12190957;12190957;12191774;12191774;12191774;12191838;12192348;12192348;12192431;12192431;12192863;12192863;12192863;12193955;12193955;12194584;12194584;12201967;12201967;12206740;12206740	12167169;12167169;12167169;12188895;12188895;12191085;12191085;12191085;12191923;12191923;12191923;12191923;12192524;12192358;12192524;12192524;12193008;12193098;12193098;12194032;12194032;12194618;12194618;12202171;12202171;12209228;12209220	+;+;+;+;+;+;+;+;+;+;+;+;+;+;+;+;+;+;+;+;+;+;+;+;+;+;+	3778	281	141	138	337	257	661	636	181	155	298	297	389	166	217	562	224	106	501	233	761	446	306	231	262	441	430	382	572	176	420	479	651	551	642	227	185	221	275	415	341	543	380	291	328
ENSG00000263676.1	chr1	12191713	12191773	+	61	0	0	0	0	0	5	0	4	0	0	0	0	0	0	0	0	1	0	0	0	0	0	3	2	0	0	0	0	0	0	0	0	0	2	9	0	1	0	1	0	0	0	0	0
ENSG00000225196.2	chr1	12220794	12221109	-	316	5	0	0	0	0	0	0	3	0	0	0	0	0	0	2	0	1	0	0	0	9	0	2	0	3	0	0	0	0	0	0	0	0	0	2	0	0	0	0	0	0	0	0	0
ENSG00000252969.1	chr1	12221148	12221271	-	124	0	0	0	0	0	0	0	6	0	0	0	0	0	0	0	0	0	0	0	0	0	0	5	0	0	0	0	0	0	0	0	0	0	0	0	0	1	0	0	0	0	0	0	0
ENSG00000048707.15	chr1;chr1;chr1;chr1;chr1;chr1;chr1;chr1;chr1;chr1;chr1;chr1;chr1;chr1;chr1;chr1;chr1;chr1;chr1;chr1;chr1;chr1;chr1;chr1;chr1;chr1;chr1;chr1;chr1;chr1;chr1;chr1;chr1;chr1;chr1;chr1;chr1;chr1;chr1;chr1;chr1;chr1;chr1;chr1;chr1;chr1;chr1;chr1;chr1;chr1;chr1;chr1;chr1;chr1;chr1;chr1;chr1;chr1;chr1;chr1;chr1;chr1;chr1;chr1;chr1;chr1;chr1;chr1;chr1;chr1;chr1;chr1;chr1;chr1;chr1;chr1;chr1;chr1;chr1;chr1…	12230030;12230067;12234191;12234191;12242513;12242513;12244246;12244246;12244424;12244537;12244537;12244537;12249223;12249223;12249223;12253722;12253722;12253734;12256276;12256333;12256333;12256987;12256987;12256987;12257935;12257935;12257935;12260693;12260693;12260948;12260948;12261901;12261901;12266881;12266881;12267845;12267845;12268706;12268706;12270994;12270994;12273003;12273003;12275825;122…	12230120;12230120;12234363;12234363;12242590;12242590;12244436;12244436;12244436;12244617;12244617;12244617;12249603;12249339;12249339;12253826;12253826;12253826;12256503;12256503;12256503;12257087;12257087;12257087;12257955;12258103;12258103;12260794;12260794;12261149;12261149;12262080;12262080;12267011;12267011;12267920;12267920;12268876;12268876;12271124;12271124;12273135;12273135;12278038;122…	+;+;+;+;+;+;+;+;+;+;+;+;+;+;+;+;+;+;+;+;+;+;+;+;+;+;+;+;+;+;+;+;+;+;+;+;+;+;+;+;+;+;+;+;+;+;+;+;+;+;+;+;+;+;+;+;+;+;+;+;+;+;+;+;+;+;+;+;+;+;+;+;+;+;+;+;+;+;+;+;+;+;+;+;+;+;+;+;+;+;+;+;+;+;+;+;+;+;+;+;+;+;+;+;+;+;+;+;+;+;+;+;+;+;+;+;+;+;+;+;+;+;+;+;+;+;+;+;+;+;+;+;+;+;+;+;+;+;+;+;+;+;+;+;+;+;+;+;+;+;+;+;+;+;+;+;+;+;+;+;+;+;+;+;+;+;+;+;+;+;+;+;+;+;+;+;+;+;+;+;+;+;+;+;+;+;+;+;+;+;+;+;+;+;+;+;+;+;+;+…	20768	3688	1411	1536	2695	3939	4207	5133	1959	5119	2901	4969	4409	1082	6481	5039	2906	1250	4186	3297	3053	2825	2899	1223	1283	3412	3095	3294	4371	3578	4103	2906	3565	5215	3925	2338	4930	1629	2586	2350	4489	3209	3351	4219	2884
ENSG00000239149.1	chr1	12507246	12507397	+	152	3	1	0	0	45	54	7	2	0	0	13	20	39	7	22	0	1	1	3	2	4	10	5	1	1	14	2	4	2	32	23	10	25	4	6	29	3	6	0	7	16	29	31	7
ENSG00000229484.1	chr1;chr1	12527724;12528052	12527792;12528420	+;+	438	0	0	0	0	0	7	4	18	4	10	0	23	0	5	0	28	37	1	9	1	16	0	36	3	0	0	4	14	7	2	0	0	1	4	2	0	42	0	4	0	0	6	5	0
ENSG00000162496.9	chr1;chr1;chr1;chr1;chr1;chr1;chr1;chr1;chr1;chr1;chr1;chr1;chr1;chr1;chr1;chr1	12567910;12568392;12572728;12572728;12578718;12578718;12579293;12579293;12579768;12580523;12580523;12580523;12595986;12616560;12616560;12617154	12568424;12568424;12572853;12572853;12578956;12578956;12579412;12579412;12580666;12580666;12580666;12580666;12596308;12616696;12616795;12618210	-;-;-;-;-;-;-;-;-;-;-;-;-;-;-;-	3515	306	254	213	340	501	655	704	229	417	860	223	613	306	780	496	639	163	141	100	418	463	244	299	155	308	301	784	895	238	735	241	999	850	1056	247	441	402	738	848	678	414	288	757	325
ENSG00000221340.1	chr1	12569972	12570072	-	101	0	31	7	1	3	10	14	10	0	3	6	4	2	23	23	52	9	0	0	0	26	5	9	0	0	8	0	14	1	25	19	14	4	33	10	2	5	15	6	0	5	1	14	25
ENSG00000276830.1	chr1	12578957	12579023	-	67	0	0	6	0	0	6	0	0	0	0	0	0	4	0	0	1	0	0	0	1	3	0	0	0	0	0	0	8	0	3	0	0	3	10	4	3	4	7	7	0	0	0	6	0
ENSG00000272482.1	chr1	12618900	12619244	-	345	22	13	2	5	8	3	28	26	15	51	3	11	0	0	16	51	9	4	2	3	79	2	64	11	4	9	57	17	21	17	0	31	5	30	9	5	70	22	40	4	7	0	36	7
ENSG00000204518.2	chr1;chr1;chr1;chr1	12644547;12651123;12661791;12665961	12644714;12651339;12661854;12667086	+;+;+;+	1575	0	0	0	0	0	1	0	105	0	10	0	0	3	0	2	13	40	0	1	0	134	0	140	6	0	0	13	0	18	0	0	15	9	0	9	0	96	3	0	2	0	0	15	0
ENSG00000226166.2	chr1	12692909	12693020	+	112	0	0	0	0	0	0	0	4	0	0	0	0	0	0	0	2	5	0	0	0	0	0	3	0	0	0	0	0	0	0	0	0	0	0	0	0	1	0	0	0	0	0	0	0
ENSG00000188984.12	chr1;chr1;chr1;chr1;chr1;chr1;chr1	12716110;12716115;12719475;12720883;12720883;12725222;12725222	12716344;12716344;12719691;12720946;12720946;12728759;12728760	+;+;+;+;+;+;+	4055	0	4	0	0	10	0	0	207	0	0	0	0	0	0	0	120	59	0	0	0	157	0	219	8	0	0	35	0	30	0	0	0	0	0	35	0	109	0	3	0	0	0	19	0
ENSG00000157330.10	chr1;chr1;chr1;chr1;chr1;chr1;chr1;chr1;chr1	12746200;12746387;12746425;12753358;12755700;12759310;12759310;12760770;12760770	12746541;12746541;12746541;12753926;12755813;12759487;12759487;12761169;12763699	+;+;+;+;+;+;+;+;+	4133	0	0	0	0	0	3	0	164	0	0	0	2	0	0	7	59	80	0	0	0	127	6	186	11	3	0	8	1	47	0	0	1	0	2	20	3	96	0	2	13	0	0	1	0
ENSG00000116726.5	chr1;chr1;chr1	12773738;12775543;12777011	12775154;12776118;12777906	+;+;+	2889	0	0	0	0	0	2	0	57	0	0	0	0	0	0	0	25	46	0	0	0	120	0	97	2	0	0	52	0	22	0	0	0	0	0	23	0	47	3	0	0	1	0	0	0
ENSG00000116721.9	chr1;chr1;chr1;chr1;chr1;chr1	12791397;12793203;12793915;12794691;12795438;12795438	12791474;12793514;12794493;12794969;12796628;12796485	+;+;+;+;+;+	2439	0	0	0	0	0	1	0	56	0	0	0	0	0	0	0	23	30	0	0	0	90	0	97	6	0	0	5	0	7	0	0	0	0	0	1	0	75	0	2	0	0	0	0	0
ENSG00000228338.1	chr1;chr1	12822686;12823036	12822939;12823159	-;-	378	0	0	0	0	0	0	0	5	0	0	0	0	0	0	0	0	1	0	0	0	8	0	16	0	0	0	4	0	0	0	0	0	0	0	0	0	5	0	0	0	0	0	0	0
ENSG00000239810.3	chr1;chr1;chr1;chr1	12824605;12827249;12828497;12831356	12825503;12827830;12828805;12831410	-;-;-;-	1845	0	0	0	0	0	0	0	18	0	0	0	0	0	0	0	0	18	0	0	0	14	0	49	0	0	0	2	0	0	0	0	0	0	0	0	0	18	0	0	0	0	0	0	0
ENSG00000231103.2	chr1;chr1;chr1;chr1	12838125;12838483;12840102;12841075	12838204;12838959;12840678;12841357	-;-;-;-	1417	0	0	0	0	0	0	0	23	0	0	0	0	0	0	0	0	11	0	0	0	18	0	39	0	0	0	0	0	1	0	0	0	0	0	0	0	20	0	0	0	0	0	0	0
ENSG00000179172.10	chr1;chr1	12847377;12848681	12848470;12848720	-;-	1134	7	0	9	11	12	9	17	25	11	2	12	35	0	0	9	17	5	11	5	7	32	3	80	3	14	8	7	9	4	15	8	12	16	21	4	8	12	9	13	19	3	8	11	8
ENSG00000120952.4	chr1;chr1;chr1;chr1	12857086;12858985;12859693;12861221	12857147;12859296;12860271;12861909	+;+;+;+	1642	0	0	0	0	0	0	0	43	0	0	0	0	0	0	0	13	45	0	0	0	116	0	50	4	0	0	9	0	7	0	0	0	0	0	0	0	54	3	2	0	0	0	0	0
ENSG00000243073.4	chr1;chr1;chr1;chr1	12879212;12881854;12883102;12886147	12880105;12882435;12883410;12886201	-;-;-;-	1840	0	0	0	0	0	0	0	37	0	0	0	0	0	0	0	6	26	0	0	0	54	0	23	0	0	0	0	0	7	0	0	0	0	0	9	0	28	0	0	0	0	0	0	0
ENSG00000187545.5	chr1;chr1;chr1;chr1	12892896;12894586;12895561;12898216	12893474;12895164;12895872;12898270	-;-;-;-	1525	0	0	0	0	0	1	0	52	0	0	0	0	0	0	0	6	43	0	0	0	49	0	92	2	0	0	24	0	11	0	0	0	5	0	0	0	33	0	0	0	0	0	0	0
ENSG00000204510.5	chr1;chr1;chr1;chr1;chr1;chr1;chr1	12916610;12917625;12917693;12918362;12918362;12919852;12919852	12916707;12917979;12917979;12918937;12918937;12920482;12920480	+;+;+;+;+;+;+	1660	0	0	0	0	0	0	0	50	0	0	0	0	0	0	0	8	33	0	0	0	37	0	87	2	0	0	2	0	33	0	0	0	0	0	3	0	65	0	0	0	1	0	0	0
ENSG00000207434.1	chr1	12922554	12922660	+	107	1	0	0	0	0	0	0	1	0	0	0	0	1	1	0	1	0	0	0	0	1	1	0	0	0	0	0	0	0	0	0	1	0	0	0	0	0	0	0	0	0	0	0	0
ENSG00000234064.1	chr1;chr1	12926162;12927695	12926741;12928253	+;+	1139	0	0	0	0	0	0	0	30	0	0	0	0	0	0	0	54	22	0	0	0	50	0	64	2	0	0	11	0	40	0	0	0	0	0	0	0	66	0	1	0	0	0	0	0
ENSG00000232423.6	chr1;chr1;chr1;chr1;chr1;chr1;chr1;chr1	12938472;12938472;12940984;12940984;12942232;12942232;12945353;12947517	12939236;12939236;12941565;12941565;12942540;12942540;12945416;12947580	-;-;-;-;-;-;-;-	1784	0	0	0	0	0	0	0	31	0	0	0	0	0	0	0	14	25	0	0	0	27	0	35	0	0	0	0	0	2	0	0	0	0	0	13	0	25	0	0	0	0	0	0	0
ENSG00000274178.2	chr1;chr1;chr1	13029339;13030047;13031572	13029650;13030625;13032130	+;+;+	1450	0	0	0	0	0	0	0	18	0	0	0	0	0	0	0	44	41	0	0	0	29	0	73	0	0	0	0	0	6	0	0	0	0	0	0	0	42	3	1	0	0	0	0	0
ENSG00000274764.6	chr1;chr1;chr1;chr1	13049476;13052118;13053367;13056414	13050369;13052699;13053675;13056575	-;-;-;-	1947	0	0	0	0	0	0	0	22	0	0	0	0	0	0	0	1	0	0	0	0	17	0	22	0	0	0	5	0	8	0	0	0	0	1	1	0	11	0	0	0	0	0	0	0
ENSG00000277058.2	chr1;chr1	13060869;13061144	13060930;13062229	+;+	1148	0	0	0	0	0	1	0	34	0	0	0	1	0	0	0	53	53	1	0	0	95	0	99	0	0	0	15	1	3	0	0	0	0	0	5	0	52	0	0	1	0	0	0	0
ENSG00000229571.7	chr1;chr1;chr1;chr1;chr1;chr1;chr1;chr1	13068677;13070853;13073678;13073678;13074659;13074659;13076991;13076991	13068754;13070907;13073986;13073986;13075240;13075240;13077884;13077884	+;+;+;+;+;+;+;+	1918	0	0	0	0	0	0	0	17	0	0	0	0	0	0	0	34	10	0	0	0	34	0	45	3	0	0	0	0	13	0	0	0	0	0	1	0	33	0	0	0	0	0	0	0
ENSG00000277862.1	chr1;chr1;chr1	13095179;13096713;13097685	13095762;13097288;13097971	-;-;-	1447	0	0	0	0	0	0	0	27	0	0	0	0	0	0	0	15	8	0	0	0	68	0	55	0	0	0	7	0	8	0	0	0	0	2	1	0	30	0	0	0	0	0	1	0
ENSG00000236179.1	chr1;chr1	13104403;13105378	13104981;13105689	-;-	891	0	0	0	0	0	0	0	7	0	0	0	0	0	0	0	0	15	1	0	2	3	0	8	0	0	0	10	0	1	0	0	0	0	0	0	0	2	0	0	0	0	0	0	0
ENSG00000275774.3	chr1;chr1	13115488;13116793	13116581;13116854	-;-	1156	0	0	1	1	2	0	7	4	0	0	0	0	0	4	0	3	6	1	0	0	5	0	21	0	0	0	2	0	14	0	0	0	0	2	0	0	10	0	1	1	4	0	1	0
ENSG00000229978.1	chr1;chr1;chr1;chr1;chr1	13128818;13129501;13129793;13131027;13131027	13129104;13130076;13130076;13131615;13131409	+;+;+;+;+	1452	0	0	0	0	0	0	0	38	0	0	0	0	0	0	0	33	21	0	1	0	60	0	62	0	0	0	1	0	27	0	0	0	0	0	17	0	44	0	0	0	0	0	0	0
ENSG00000233336.1	chr1;chr1	13146981;13147337	13147240;13147460	-;-	384	0	0	0	0	0	0	0	17	0	0	0	0	0	5	0	0	19	0	0	0	25	0	24	0	0	0	14	0	9	0	0	0	0	0	8	0	13	0	0	0	0	0	0	0
ENSG00000280267.4	chr1;chr1;chr1;chr1	13148905;13151549;13152803;13155884	13149798;13152130;13153111;13155961	-;-;-;-	1863	0	0	0	0	0	0	0	7	0	0	0	0	0	0	0	8	15	0	0	0	18	0	40	8	0	0	23	0	0	0	0	0	0	0	0	0	28	0	0	0	0	0	0	0
ENSG00000179412.11	chr1	13163914	13165631	-	1718	0	0	0	0	0	0	0	16	0	0	0	0	0	0	0	5	22	0	0	0	19	0	28	0	5	0	15	0	0	0	0	0	0	0	0	0	4	0	0	0	0	0	0	0
ENSG00000204505.4	chr1;chr1;chr1;chr1	13172455;13175265;13176241;13178571	13172532;13175573;13176822;13179464	+;+;+;+	1863	0	0	0	0	0	0	0	16	0	0	0	0	8	0	0	19	8	0	0	0	24	0	34	6	0	0	8	0	2	0	0	0	0	1	3	0	19	0	0	0	0	0	1	0
ENSG00000279169.3	chr1;chr1;chr1;chr1;chr1;chr1	13196188;13196330;13197852;13198328;13199303;13201332	13197381;13197381;13198130;13198906;13199614;13201409	-;-;-;-;-;-	2442	0	0	0	0	0	0	0	8	0	0	0	0	0	0	0	30	4	0	0	0	53	0	31	0	0	0	0	0	0	0	0	0	0	0	1	1	2	0	0	0	0	0	0	0
ENSG00000279804.2	chr1;chr1;chr1	13222705;13224855;13225820	13223905;13225433;13226106	-;-;-	2067	0	0	0	0	0	0	0	37	0	0	0	0	0	0	0	30	28	0	0	0	97	0	54	2	0	0	4	0	12	0	0	0	0	0	10	0	40	0	0	0	0	0	0	0
ENSG00000250894.1	chr1;chr1;chr1	13245863;13246546;13248145	13246149;13247121;13248652	+;+;+	1371	0	0	0	0	0	0	0	34	0	0	0	0	0	0	0	24	38	0	0	0	40	0	47	0	0	0	2	0	3	0	0	0	0	0	25	0	31	0	3	0	0	0	0	0
ENSG00000270601.4	chr1;chr1;chr1;chr1	13254212;13259247;13260222;13262550	13254275;13259555;13260803;13263314	+;+;+;+	1720	0	0	0	1	0	0	0	34	0	0	0	0	0	0	0	15	22	0	0	0	43	0	45	0	0	0	4	0	2	0	0	0	0	6	0	0	19	1	0	0	0	0	0	0
ENSG00000231219.1	chr1;chr1	13273539;13275133	13274111;13275627	-;-	1068	0	0	0	0	0	0	0	35	0	0	0	0	0	0	0	11	13	0	0	0	31	0	20	0	0	0	9	0	14	0	0	0	0	0	1	0	22	0	0	0	0	0	0	0
ENSG00000207511.1	chr1	13279125	13279231	-	107	0	0	0	2	0	1	0	1	0	0	0	0	0	1	0	0	0	0	0	2	0	0	0	0	1	1	1	0	1	0	0	0	0	0	0	1	4	0	0	2	1	0	0	0
ENSG00000182330.10	chr1;chr1;chr1;chr1;chr1;chr1;chr1;chr1;chr1;chr1;chr1	13281035;13281168;13281302;13282847;13282847;13282847;13283805;13283805;13283805;13285077;13285097	13281932;13281932;13281932;13283422;13283422;13283422;13284091;13284169;13284116;13285174;13285154	-;-;-;-;-;-;-;-;-;-;-	1937	0	0	0	0	0	0	0	68	0	0	0	0	0	0	0	3	22	0	0	0	54	0	74	0	0	0	10	0	22	0	0	0	0	0	1	0	42	0	0	0	12	0	0	0
ENSG00000237700.2	chr1;chr1;chr1;chr1	13303539;13305930;13306638;13308329	13303586;13306241;13307216;13308907	+;+;+;+	1518	0	0	0	0	0	0	0	86	0	0	0	0	0	0	0	2	33	0	0	0	100	0	56	0	0	0	4	0	40	0	0	0	0	0	4	0	34	1	8	0	0	0	0	0
ENSG00000204501.7	chr1;chr1;chr1;chr1	13315581;13318392;13319372;13321703	13315658;13318700;13319953;13322598	+;+;+;+	1865	0	0	0	0	0	0	0	16	0	0	0	0	0	0	0	24	6	0	0	0	48	0	69	0	0	0	0	0	6	0	0	0	0	0	3	0	30	0	0	0	0	0	0	0
ENSG00000228229.2	chr1;chr1	13324039;13324259	13324162;13324518	+;+	384	0	0	0	0	0	0	0	6	0	0	0	0	0	0	0	1	11	0	0	0	7	0	23	0	0	0	0	0	0	0	0	0	0	0	0	0	18	0	0	0	0	0	0	0
ENSG00000204481.8	chr1;chr1;chr1;chr1;chr1;chr1	13341892;13342034;13343562;13344038;13345028;13347057	13343086;13343086;13343840;13344616;13345339;13347134	-;-;-;-;-;-	2443	0	0	0	0	0	0	0	79	0	0	0	0	0	0	0	21	53	0	0	0	62	0	96	0	0	0	10	0	7	0	0	0	0	1	4	0	41	0	0	0	0	0	0	9
ENSG00000204480.8	chr1;chr1;chr1	13369067;13370649;13371614	13369640;13371227;13371900	-;-;-	1440	0	0	0	0	0	4	0	35	0	0	0	0	0	0	0	1	1	0	0	0	42	0	56	4	0	0	33	0	2	0	0	0	0	0	3	0	63	0	0	0	0	0	0	0
ENSG00000204479.4	chr1;chr1;chr1	13389632;13390341;13391944	13389944;13390919;13392629	+;+;+	1578	0	0	0	0	0	1	0	62	0	0	0	0	0	0	0	48	55	0	0	0	76	0	64	1	0	0	0	0	16	0	0	0	0	0	0	0	54	0	4	0	0	0	0	0
ENSG00000204478.10	chr1;chr1;chr1	13416351;13418122;13420697	13416641;13418700;13421328	+;+;+	1502	0	0	0	0	0	0	0	51	0	0	0	0	0	0	0	1	46	0	0	0	22	0	85	3	0	0	2	0	14	0	0	0	0	0	0	0	39	6	0	0	0	0	0	0
ENSG00000162494.6	chr1;chr1	13474973;13512963	13476099;13514003	-;-	2168	0	0	0	0	0	0	0	39	0	0	0	1	0	0	0	4	23	0	0	0	26	0	59	0	4	0	3	0	1	0	0	0	0	1	1	1	12	0	18	0	0	0	0	0
ENSG00000259961.1	chr1;chr1;chr1	13513220;13514291;13516170	13513341;13514544;13516270	+;+;+	477	0	0	0	0	0	0	0	7	0	0	0	0	0	0	0	0	0	0	0	0	24	0	13	0	0	0	0	0	0	0	0	0	0	0	0	0	4	0	4	0	0	0	0	0
ENSG00000215909.3	chr1;chr1	13555001;13555613	13555289;13555694	+;+	371	0	0	0	0	0	0	0	2	0	0	0	0	0	0	0	0	0	0	0	0	12	0	45	1	0	0	0	0	1	0	0	0	0	3	1	0	20	0	0	1	0	0	0	0
ENSG00000162493.16	chr1;chr1;chr1;chr1;chr1;chr1;chr1;chr1;chr1;chr1;chr1;chr1;chr1;chr1;chr1;chr1;chr1;chr1;chr1;chr1;chr1;chr1;chr1;chr1;chr1;chr1;chr1;chr1;chr1;chr1;chr1;chr1;chr1;chr1;chr1;chr1;chr1;chr1;chr1;chr1;chr1;chr1;chr1;chr1;chr1;chr1;chr1;chr1;chr1;chr1;chr1;chr1;chr1;chr1;chr1;chr1;chr1;chr1;chr1;chr1;chr1;chr1;chr1;chr1;chr1;chr1;chr1;chr1	13583465;13583757;13583762;13583831;13583832;13583833;13584093;13584267;13584270;13585461;13585472;13585480;13595827;13595827;13607173;13607173;13607173;13607173;13607173;13607173;13607173;13607173;13607173;13607173;13607173;13607173;13610387;13610387;13610387;13610387;13610387;13610387;13610387;13610387;13610387;13610387;13613687;13613687;13613687;13613687;13613687;13613687;13613687;13613687;136…	13584100;13584100;13584100;13584100;13584100;13584100;13584188;13584341;13584341;13585639;13585568;13585639;13595984;13595984;13607306;13607306;13607306;13607306;13607306;13607306;13607306;13607221;13607306;13607306;13607306;13607306;13610516;13610516;13610516;13610516;13610516;13610516;13610516;13610516;13610516;13610516;13613725;13613725;13613725;13613725;13613725;13613725;13613725;13613725;136…	+;+;+;+;+;+;+;+;+;+;+;+;+;+;+;+;+;+;+;+;+;+;+;+;+;+;+;+;+;+;+;+;+;+;+;+;+;+;+;+;+;+;+;+;+;+;+;+;+;+;+;+;+;+;+;+;+;+;+;+;+;+;+;+;+;+;+;+	3707	183	267	67	90	25	217	408	194	36	282	34	312	109	123	256	179	132	31	82	361	310	259	268	138	161	199	380	127	79	279	38	163	598	315	159	102	168	199	90	385	126	107	160	101
ENSG00000222952.1	chr1	13623184	13623284	-	101	0	0	0	0	0	0	0	2	0	0	0	0	0	0	0	0	0	0	0	4	17	3	14	0	0	0	0	0	3	0	0	0	0	0	0	0	10	0	0	1	0	0	0	0
ENSG00000237445.2	chr1;chr1	13657311;13659577	13657355;13659910	-;-	379	0	0	0	0	0	0	0	8	0	0	0	0	0	0	0	6	0	0	0	0	5	0	5	0	0	0	0	0	2	0	0	0	0	0	0	0	17	0	0	0	0	0	0	0
ENSG00000253085.1	chr1	13696070	13696199	-	130	0	0	0	0	0	0	0	7	3	0	0	0	0	0	0	9	5	0	0	0	18	0	12	6	0	0	0	0	2	0	0	0	0	0	0	0	12	0	0	0	0	0	0	0
ENSG00000116731.22	chr1;chr1;chr1;chr1;chr1;chr1;chr1;chr1;chr1;chr1;chr1;chr1;chr1;chr1;chr1;chr1;chr1;chr1;chr1;chr1;chr1;chr1;chr1;chr1;chr1;chr1;chr1;chr1;chr1;chr1;chr1;chr1;chr1;chr1;chr1;chr1;chr1;chr1;chr1;chr1;chr1;chr1;chr1;chr1;chr1;chr1;chr1;chr1;chr1;chr1;chr1;chr1;chr1;chr1;chr1;chr1;chr1;chr1;chr1;chr1;chr1;chr1;chr1;chr1;chr1;chr1;chr1;chr1;chr1;chr1;chr1;chr1;chr1;chr1;chr1	13700198;13700240;13704855;13704855;13715541;13715541;13715541;13715541;13731000;13731000;13731000;13731000;13731018;13732779;13732779;13732779;13732779;13738750;13738785;13742005;13742005;13742005;13742005;13742005;13742005;13742005;13749361;13749361;13749361;13749361;13749361;13749361;13749361;13749403;13749415;13749424;13749435;13749436;13749436;13769039;13769118;13769118;13769118;13769118;137…	13700300;13700300;13705645;13705645;13715614;13715614;13715614;13715614;13731117;13731117;13731117;13731117;13731117;13732882;13732882;13732882;13732855;13738940;13738940;13742157;13742157;13742157;13742157;13742157;13742157;13742157;13749487;13749487;13749487;13749487;13749487;13749463;13749487;13749487;13749487;13749487;13749487;13749487;13749487;13769173;13769173;13769173;13769173;13769173;137…	+;+;+;+;+;+;+;+;+;+;+;+;+;+;+;+;+;+;+;+;+;+;+;+;+;+;+;+;+;+;+;+;+;+;+;+;+;+;+;+;+;+;+;+;+;+;+;+;+;+;+;+;+;+;+;+;+;+;+;+;+;+;+;+;+;+;+;+;+;+;+;+;+;+;+	10923	2070	917	589	1609	1506	2227	3098	903	2448	1130	1741	2500	429	2599	2631	1250	759	2415	1159	1918	1544	2119	667	633	1876	1899	2031	1705	1411	1870	2083	2070	2921	2433	1210	1929	957	1192	1413	1511	1811	1473	1529	939
ENSG00000189337.17	chr1;chr1;chr1;chr1;chr1;chr1;chr1;chr1;chr1;chr1;chr1;chr1;chr1;chr1;chr1;chr1;chr1;chr1;chr1;chr1;chr1;chr1;chr1;chr1;chr1;chr1;chr1;chr1;chr1;chr1;chr1;chr1;chr1;chr1;chr1;chr1;chr1;chr1;chr1;chr1;chr1;chr1;chr1;chr1;chr1;chr1;chr1;chr1;chr1;chr1;chr1;chr1;chr1;chr1;chr1;chr1;chr1;chr1;chr1;chr1;chr1;chr1;chr1;chr1;chr1;chr1;chr1;chr1;chr1;chr1;chr1;chr1;chr1;chr1;chr1;chr1;chr1;chr1;chr1;chr1	13892792;13892792;14180435;14180435;14304590;14598685;14598704;14598717;14598983;14598983;14924130;14929800;14929800;14945919;14960684;14960684;14960684;14960684;14960684;14960684;14960684;14960684;15034749;15034749;15034749;15034749;15034749;15034749;15034749;15034749;15043989;15043989;15043989;15043989;15043989;15043989;15043989;15043989;15056091;15056091;15056091;15056091;15056091;15056091;150…	13893756;13893756;14180592;14180592;14304663;14599223;14599223;14598910;14599223;14599223;14924572;14930044;14930044;14946173;14960875;14960875;14960875;14960875;14960875;14960875;14960875;14960875;15034885;15034885;15034885;15034885;15034885;15034885;15034885;15034885;15044159;15044159;15044159;15044159;15044159;15044159;15044159;15044159;15056280;15056280;15056145;15056280;15056280;15056280;150…	+;+;+;+;+;+;+;+;+;+;+;+;+;+;+;+;+;+;+;+;+;+;+;+;+;+;+;+;+;+;+;+;+;+;+;+;+;+;+;+;+;+;+;+;+;+;+;+;+;+;+;+;+;+;+;+;+;+;+;+;+;+;+;+;+;+;+;+;+;+;+;+;+;+;+;+;+;+;+;+	13860	1029	183	292	401	328	515	652	504	1225	256	696	592	262	263	1265	963	308	372	192	301	536	595	573	122	349	807	576	612	522	461	597	392	585	434	325	482	650	191	219	632	244	311	317	124
ENSG00000252151.1	chr1	14124233	14124335	-	103	4	0	0	0	0	0	0	0	1	0	0	0	0	1	0	0	0	0	16	0	0	2	0	0	0	4	0	0	0	0	0	0	0	0	3	0	0	0	0	0	0	0	0	1
ENSG00000231606.2	chr1;chr1;chr1;chr1;chr1;chr1;chr1	14221887;14221891;14223054;14223054;14258867;14282636;14304385	14222107;14222107;14223239;14223239;14259698;14282884;14304445	-;-;-;-;-;-;-	1549	206	8	72	112	136	111	266	97	269	13	140	69	56	65	618	202	70	94	53	5	66	86	89	20	33	285	83	66	209	90	214	87	126	254	150	7	91	48	95	136	98	81	20	53
ENSG00000234593.3	chr1;chr1;chr1;chr1;chr1;chr1;chr1;chr1;chr1;chr1;chr1;chr1;chr1;chr1;chr1;chr1;chr1;chr1;chr1;chr1;chr1;chr1;chr1;chr1;chr1;chr1;chr1;chr1;chr1;chr1;chr1	14338825;14346236;14348475;14348947;14348948;14348948;14348949;14348956;14350869;14350869;14350869;14350869;14350869;14350869;14390655;14390686;14390686;14390686;14391445;14391459;14391459;14391459;14391459;14409406;14409406;14419494;14419494;14419494;14419494;14419494;14419494	14339018;14346470;14348565;14349378;14349378;14349378;14349378;14349378;14351025;14351025;14351025;14351025;14351324;14351025;14391578;14390744;14390751;14390751;14391578;14391578;14391578;14391578;14391578;14409451;14409451;14419973;14419973;14419589;14419973;14419966;14419973	-;-;-;-;-;-;-;-;-;-;-;-;-;-;-;-;-;-;-;-;-;-;-;-;-;-;-;-;-;-;-	2858	355	18	31	156	313	162	548	332	396	59	263	186	30	207	1355	294	158	155	86	20	229	127	258	78	45	444	276	167	345	273	602	159	94	462	194	604	260	43	174	262	164	207	96	77
ENSG00000235829.1	chr1;chr1	14692129;14692567	14692407;14692613	-;-	326	52	3	0	9	3	12	24	24	27	0	19	7	0	7	71	62	8	0	0	0	15	1	18	9	5	7	4	23	11	14	2	2	20	6	29	4	60	0	1	13	0	8	0	8
ENSG00000287756.1	chr1;chr1	14774469;14777534	14775727;14777727	-;-	1453	248	21	9	69	41	31	92	104	213	13	16	91	6	24	190	267	26	47	6	11	101	22	107	2	0	49	60	57	68	58	68	17	40	11	41	5	201	26	99	121	31	49	12	10
ENSG00000175147.13	chr1;chr1;chr1;chr1;chr1;chr1;chr1;chr1;chr1;chr1;chr1;chr1;chr1;chr1;chr1;chr1;chr1;chr1;chr1;chr1;chr1;chr1;chr1	15111815;15111869;15115981;15118327;15118327;15119408;15120107;15120577;15120972;15120972;15121952;15124228;15124228;15124228;15124228;15124228;15152291;15152291;15152291;15152291;15152291;15152291;15153171	15117807;15117807;15117807;15118904;15118904;15121059;15121059;15120697;15121059;15121059;15124373;15124373;15124373;15124373;15124373;15124373;15152355;15152699;15153237;15153618;15152464;15152458;15153338	-;-;-;-;-;-;-;-;-;-;-;-;-;-;-;-;-;-;-;-;-;-;-	11973	87	39	6	58	74	60	42	260	64	53	86	216	10	88	50	292	96	78	22	61	318	66	360	42	60	132	102	41	90	23	109	61	137	54	117	268	287	27	43	73	71	38	45	71
ENSG00000171729.14	chr1;chr1;chr1;chr1;chr1;chr1;chr1;chr1;chr1;chr1;chr1;chr1;chr1;chr1;chr1;chr1;chr1;chr1;chr1;chr1;chr1	15152532;15152566;15152577;15153733;15153747;15153768;15210490;15210490;15210490;15214895;15214895;15214895;15214895;15214895;15214895;15219326;15219326;15219326;15219326;15219326;15219330	15152784;15152784;15152784;15153954;15153954;15153954;15210562;15210562;15210562;15215431;15215431;15215431;15215431;15215431;15215431;15220478;15220408;15219346;15220339;15220477;15220393	+;+;+;+;+;+;+;+;+;+;+;+;+;+;+;+;+;+;+;+;+	2238	116	73	24	86	113	149	57	129	48	19	127	122	23	48	58	50	35	50	67	126	142	108	115	42	162	96	70	81	53	44	185	81	232	163	124	251	107	45	40	160	45	134	110	65
ENSG00000204464.7	chr1;chr1;chr1;chr1	15164344;15168474;15171181;15171181	15164461;15168777;15171317;15171317	-;-;-;-	559	53	45	6	34	26	39	50	38	17	0	34	70	0	16	16	15	49	8	17	25	26	29	39	28	72	13	52	34	28	47	37	13	12	14	17	77	37	13	9	63	40	35	43	36
ENSG00000215720.4	chr1;chr1	15191828;15192750	15192441;15192845	-;-	710	11	29	7	16	27	20	4	44	14	3	7	49	0	18	32	20	23	26	23	12	47	17	59	14	30	12	28	22	14	4	27	37	33	9	5	21	40	2	4	11	38	13	6	4
ENSG00000278480.1	chr1;chr1	15226373;15227455	15227243;15227549	+;+	966	0	1	0	0	0	2	0	71	10	8	0	0	0	5	0	13	22	7	0	3	91	0	54	4	0	0	12	0	14	9	1	11	0	16	7	0	53	0	0	0	0	0	0	4
ENSG00000142621.19	chr1;chr1;chr1;chr1;chr1;chr1;chr1;chr1;chr1;chr1;chr1;chr1;chr1;chr1;chr1;chr1;chr1;chr1;chr1;chr1;chr1;chr1;chr1;chr1;chr1;chr1;chr1;chr1;chr1;chr1;chr1;chr1;chr1;chr1;chr1;chr1;chr1;chr1;chr1;chr1;chr1;chr1;chr1;chr1;chr1;chr1;chr1;chr1;chr1;chr1;chr1;chr1;chr1;chr1;chr1;chr1;chr1;chr1;chr1;chr1;chr1;chr1;chr1;chr1;chr1;chr1;chr1;chr1;chr1;chr1;chr1;chr1;chr1;chr1;chr1;chr1;chr1;chr1;chr1;chr1…	15247272;15247280;15251771;15251771;15251785;15272323;15272323;15287045;15289399;15289399;15289399;15289399;15296684;15296684;15296684;15301205;15301205;15305761;15305762;15305769;15305780;15308613;15308613;15308613;15308613;15308613;15312105;15313057;15313057;15313057;15313057;15313057;15313057;15314442;15315047;15316378;15316378;15316378;15316378;15316378;15317824;15317824;15317824;15317824;153…	15247395;15247395;15251877;15251877;15251877;15272529;15272529;15287157;15289641;15289666;15289666;15289666;15296793;15296762;15296793;15301441;15301441;15305819;15305819;15305819;15305819;15308736;15308736;15308736;15308736;15308736;15312187;15313187;15313187;15313187;15313187;15313187;15313187;15314598;15315239;15316467;15316467;15316467;15316467;15316467;15317928;15317928;15317928;15317928;153…	+;+;+;+;+;+;+;+;+;+;+;+;+;+;+;+;+;+;+;+;+;+;+;+;+;+;+;+;+;+;+;+;+;+;+;+;+;+;+;+;+;+;+;+;+;+;+;+;+;+;+;+;+;+;+;+;+;+;+;+;+;+;+;+;+;+;+;+;+;+;+;+;+;+;+;+;+;+;+;+;+;+;+;+;+;+;+;+;+;+;+;+;+;+;+;+;+;+;+;+;+;+;+;+;+;+;+;+;+;+;+;+;+;+;+;+;+;+;+;+;+;+;+;+;+;+;+;+;+;+;+;+;+;+;+;+;+;+;+;+;+;+;+;+;+;+;+;+;+;+;+;+;+;+;+;+;+;+;+;+;+;+;+;+;+;+;+;+;+;+;+;+;+;+;+;+;+;+;+;+;+;+;+;+;+;+;+;+;+;+;+;+;+;+;+;+;+;+;+;+…	12805	110	54	128	132	26	401	323	733	33	200	35	134	63	105	157	317	432	90	124	260	900	295	1074	139	66	237	293	140	291	143	351	214	410	120	156	125	612	79	48	167	202	91	118	67
ENSG00000233485.1	chr1;chr1	15326680;15343776	15329683;15343876	-;-	3105	0	0	0	0	0	0	2	63	0	6	0	0	0	0	1	5	5	0	0	0	35	0	52	0	1	3	7	0	3	0	1	2	1	1	0	0	41	0	0	0	0	4	0	0
ENSG00000236045.1	chr1;chr1	15334166;15335272	15334699;15335464	-;-	727	0	0	4	0	0	16	2	14	0	20	0	8	0	0	3	6	17	22	0	3	20	8	22	1	10	3	2	0	6	7	0	11	0	7	1	2	32	4	2	17	3	0	0	4
ENSG00000228140.2	chr1;chr1;chr1;chr1;chr1;chr1	15402979;15403025;15405660;15407837;15409070;15409287	15407907;15404144;15405848;15407882;15409171;15409433	-;-;-;-;-;-	5178	7	1	12	1	0	3	17	143	24	3	3	9	8	4	5	128	122	5	1	0	144	3	227	18	0	6	19	0	38	2	18	11	41	8	40	9	115	5	6	35	16	12	4	0
ENSG00000142634.13	chr1;chr1;chr1;chr1;chr1;chr1;chr1;chr1;chr1	15409888;15410265;15425871;15425871;15427150;15427150;15427898;15428593;15428593	15410279;15410279;15426018;15426018;15427284;15427284;15428009;15429081;15430339	+;+;+;+;+;+;+;+;+	2534	361	147	247	290	542	1339	555	185	270	278	595	558	170	316	361	292	179	385	333	975	424	478	148	215	602	666	419	469	433	529	656	701	534	629	216	203	346	339	300	364	548	595	349	387
ENSG00000162438.12	chr1;chr1;chr1;chr1;chr1;chr1;chr1;chr1;chr1;chr1;chr1;chr1;chr1;chr1;chr1;chr1;chr1;chr1;chr1;chr1;chr1;chr1	15438442;15438443;15438453;15440300;15440350;15440493;15440493;15442447;15442447;15442447;15442447;15443419;15443419;15443419;15443419;15444606;15445597;15445597;15445597;15446575;15446575;15446575	15438504;15438504;15438504;15440391;15440391;15440590;15440590;15442572;15442572;15442572;15442572;15443555;15443540;15443555;15443555;15444751;15445749;15445749;15445749;15446654;15449242;15449242	+;+;+;+;+;+;+;+;+;+;+;+;+;+;+;+;+;+;+;+;+;+	3483	3	0	0	1	0	16	10	140	2	15	0	0	1	4	0	69	86	3	0	0	157	7	278	10	1	0	23	2	51	25	0	30	1	6	45	0	155	1	9	1	1	0	0	15
ENSG00000142615.8	chr1;chr1;chr1;chr1;chr1;chr1;chr1;chr1;chr1;chr1;chr1;chr1;chr1;chr1	15456728;15456732;15456747;15457086;15457086;15457086;15461561;15461561;15462733;15462733;15463386;15465999;15467386;15471990	15456793;15456793;15456793;15457623;15457174;15457174;15461658;15461658;15462861;15463011;15463522;15466144;15467538;15472091	+;+;+;+;+;+;+;+;+;+;+;+;+;+	1519	0	14	0	6	0	0	0	30	4	16	3	4	0	4	0	22	14	0	0	0	31	0	87	10	0	1	1	6	12	4	0	30	19	0	8	0	29	0	0	0	0	2	0	0
ENSG00000215704.10	chr1;chr1;chr1;chr1;chr1;chr1;chr1;chr1;chr1;chr1;chr1;chr1;chr1;chr1;chr1;chr1;chr1;chr1;chr1;chr1;chr1	15465909;15467386;15476104;15476457;15476457;15476465;15481098;15481098;15481098;15481645;15482265;15482265;15482265;15483264;15483264;15485861;15485901;15487285;15487285;15491295;15491295	15466144;15467538;15476165;15476545;15476545;15476545;15481195;15481195;15481195;15481749;15482357;15482393;15482393;15483400;15483368;15486046;15486046;15487437;15487437;15491395;15491395	+;+;+;+;+;+;+;+;+;+;+;+;+;+;+;+;+;+;+;+;+	1449	48	0	26	12	26	19	25	53	15	50	18	15	11	40	30	10	35	3	21	21	66	22	73	4	0	18	24	3	54	48	7	33	10	11	18	0	38	31	9	17	22	22	50	2
ENSG00000132906.18	chr1;chr1;chr1;chr1;chr1;chr1;chr1;chr1;chr1;chr1;chr1;chr1;chr1;chr1;chr1;chr1;chr1;chr1;chr1;chr1;chr1;chr1;chr1;chr1;chr1;chr1;chr1;chr1;chr1;chr1;chr1;chr1;chr1;chr1;chr1;chr1;chr1;chr1;chr1;chr1;chr1;chr1;chr1;chr1;chr1;chr1;chr1;chr1;chr1;chr1;chr1;chr1;chr1;chr1;chr1;chr1;chr1;chr1;chr1;chr1;chr1;chr1;chr1;chr1;chr1;chr1;chr1;chr1;chr1;chr1;chr1;chr1	15490832;15491401;15492270;15492366;15492798;15492855;15492943;15493892;15493892;15493892;15493892;15493892;15493892;15495273;15495273;15495273;15495273;15495273;15495273;15495273;15504611;15504611;15504611;15504611;15504611;15504611;15504611;15504625;15505990;15505990;15505990;15505990;15505990;15505990;15505990;15506899;15506899;15506899;15506899;15506899;15506899;15506899;15506899;15507772;155…	15494001;15493035;15493035;15493035;15493035;15493035;15493035;15494001;15494001;15494001;15494001;15494001;15494001;15495452;15495452;15495452;15495452;15495452;15495452;15495452;15504758;15504758;15504758;15504758;15504758;15504758;15504758;15504758;15506079;15506079;15506079;15506079;15506079;15506079;15506079;15507075;15507075;15507075;15507075;15507052;15507133;15507075;15507075;15507907;155…	-;-;-;-;-;-;-;-;-;-;-;-;-;-;-;-;-;-;-;-;-;-;-;-;-;-;-;-;-;-;-;-;-;-;-;-;-;-;-;-;-;-;-;-;-;-;-;-;-;-;-;-;-;-;-;-;-;-;-;-;-;-;-;-;-;-;-;-;-;-;-;-	5269	97	23	63	109	167	123	274	286	131	168	205	114	34	326	122	260	275	75	142	210	336	184	386	40	177	104	213	114	176	88	180	93	106	130	78	66	273	80	117	184	74	163	178	101
ENSG00000116138.13	chr1;chr1;chr1;chr1;chr1;chr1;chr1;chr1;chr1;chr1;chr1;chr1;chr1;chr1;chr1;chr1;chr1;chr1;chr1;chr1;chr1;chr1;chr1;chr1;chr1;chr1;chr1;chr1;chr1;chr1;chr1;chr1;chr1;chr1;chr1;chr1;chr1;chr1;chr1;chr1;chr1;chr1;chr1;chr1;chr1;chr1;chr1;chr1;chr1;chr1;chr1;chr1;chr1;chr1;chr1;chr1;chr1;chr1;chr1;chr1;chr1;chr1;chr1;chr1;chr1;chr1;chr1;chr1;chr1;chr1;chr1;chr1;chr1;chr1;chr1;chr1;chr1;chr1;chr1;chr1…	15526813;15526813;15526813;15526813;15526848;15529088;15529088;15529088;15529088;15534237;15534237;15534237;15534237;15534237;15536475;15536475;15536475;15536475;15536475;15544399;15544399;15544399;15544399;15544399;15546767;15546767;15546767;15546767;15546767;15548270;15548270;15548270;15548270;15548270;15559526;15559526;15559526;15559526;15559526;15559608;15560131;15562142;15562142;15562142;155…	15526958;15526958;15526958;15526958;15526958;15529272;15529272;15529272;15529272;15534303;15534303;15534303;15534303;15534303;15536814;15536814;15536814;15536814;15536814;15544583;15544583;15544583;15544583;15544583;15546871;15546871;15546871;15546871;15546871;15548428;15548428;15548428;15548428;15548428;15559656;15559656;15559656;15559656;15559656;15559656;15560329;15562325;15562325;15562325;155…	+;+;+;+;+;+;+;+;+;+;+;+;+;+;+;+;+;+;+;+;+;+;+;+;+;+;+;+;+;+;+;+;+;+;+;+;+;+;+;+;+;+;+;+;+;+;+;+;+;+;+;+;+;+;+;+;+;+;+;+;+;+;+;+;+;+;+;+;+;+;+;+;+;+;+;+;+;+;+;+;+;+;+;+;+;+;+;+;+;+;+;+;+;+;+;+;+	8563	637	248	312	587	1048	823	792	580	781	278	848	627	93	1107	1216	371	305	1096	530	446	673	723	497	129	952	534	516	532	603	570	672	398	902	574	431	771	417	453	337	803	518	429	558	565
ENSG00000251866.1	chr1	15542165	15542304	+	140	12	4	1	1	32	49	7	9	1	21	4	15	0	11	10	6	11	2	5	5	19	9	9	0	17	4	24	2	2	10	9	4	9	2	11	3	1	7	0	0	7	14	5	6
ENSG00000272510.1	chr1	15565611	15565956	-	346	5	0	1	3	8	1	2	0	0	0	12	8	0	5	0	0	5	11	6	1	8	7	1	0	0	7	3	0	5	0	0	1	1	2	0	2	6	0	2	2	1	7	0	2
ENSG00000116771.6	chr1;chr1;chr1;chr1;chr1;chr1;chr1	15571699;15574757;15577685;15578859;15580094;15583193;15584696	15573724;15574841;15577864;15579054;15580142;15583395;15585051	-;-;-;-;-;-;-	3095	38	5	11	13	71	48	24	111	30	11	63	20	0	21	106	20	75	97	3	39	146	17	126	10	52	12	28	6	37	21	42	17	39	47	71	47	76	16	47	19	54	41	19	31
ENSG00000237301.1	chr1;chr1	15586136;15603089	15588442;15603626	-;-	2845	16	0	2	6	12	16	16	59	0	2	19	0	5	9	17	24	50	1	4	13	49	2	72	2	8	0	15	0	4	2	7	2	14	0	2	3	43	7	7	3	0	10	1	0
ENSG00000235084.3	chr1	15604597	15605043	+	447	11	33	4	6	28	40	20	15	16	11	39	19	20	10	21	7	9	27	21	10	24	13	58	5	20	16	23	28	20	20	40	12	33	31	2	72	14	28	11	27	61	16	43	19
ENSG00000252417.1	chr1	15608078	15608145	-	68	0	0	0	1	0	0	0	8	4	6	0	0	0	0	0	0	2	0	0	0	1	0	6	0	0	0	0	0	0	0	0	0	0	0	0	0	5	0	0	0	0	0	0	0
ENSG00000236500.1	chr1	15614643	15614867	-	225	0	0	0	0	8	0	0	3	0	0	0	0	0	0	0	0	0	0	0	0	1	0	6	0	28	3	0	0	0	0	0	0	0	0	0	2	11	0	0	0	0	0	0	0
ENSG00000197312.12	chr1;chr1;chr1;chr1;chr1;chr1;chr1;chr1;chr1;chr1;chr1;chr1;chr1;chr1;chr1;chr1;chr1;chr1;chr1;chr1;chr1;chr1;chr1;chr1;chr1;chr1;chr1;chr1;chr1;chr1	15617458;15617543;15617615;15626669;15626669;15626669;15630325;15630325;15630402;15630425;15633439;15633439;15633439;15633439;15633798;15638307;15643522;15643522;15643522;15649720;15649720;15649720;15651706;15651706;15651836;15656421;15656617;15656617;15659837;15659837	15617808;15617808;15617808;15627066;15626798;15626798;15630561;15630561;15630561;15630561;15633565;15634306;15633565;15633565;15633879;15638434;15643650;15643650;15643650;15649823;15649823;15649823;15651895;15651895;15651895;15656985;15656679;15656679;15661057;15669044	+;+;+;+;+;+;+;+;+;+;+;+;+;+;+;+;+;+;+;+;+;+;+;+;+;+;+;+;+;+	12178	899	706	702	801	1901	1661	1630	612	1750	476	1594	1356	269	2268	2028	599	469	1320	1249	936	653	1017	346	338	1335	996	848	1074	1242	1172	1263	865	1051	992	776	1444	484	559	805	1733	1176	699	1233	775
ENSG00000215695.1	chr1	15659869	15661722	+	1854	0	0	0	0	0	0	0	0	0	0	0	0	0	0	0	0	0	0	0	0	0	0	0	0	0	0	0	0	0	0	0	0	0	0	0	0	0	0	0	0	0	0	0	0
ENSG00000271742.1	chr1	15682873	15683128	-	256	5	0	0	0	3	2	0	5	33	0	2	0	0	0	0	4	22	18	0	5	14	0	9	0	0	0	2	11	0	8	0	0	9	1	31	0	11	0	1	3	2	0	0	0
ENSG00000116786.13	chr1;chr1;chr1;chr1;chr1;chr1;chr1;chr1;chr1;chr1;chr1;chr1;chr1;chr1;chr1;chr1;chr1;chr1;chr1;chr1;chr1;chr1;chr1;chr1;chr1;chr1;chr1;chr1;chr1;chr1;chr1;chr1;chr1;chr1;chr1;chr1;chr1;chr1;chr1;chr1;chr1;chr1;chr1;chr1;chr1;chr1;chr1;chr1;chr1;chr1;chr1;chr1;chr1;chr1;chr1;chr1;chr1;chr1;chr1;chr1;chr1;chr1;chr1;chr1;chr1;chr1;chr1;chr1;chr1;chr1;chr1;chr1	15684320;15684390;15684541;15684556;15716237;15716237;15716237;15716237;15716707;15716707;15716707;15717893;15717893;15717893;15717893;15718538;15718538;15718538;15718538;15719734;15719734;15719734;15719734;15721329;15721329;15725317;15725317;15725317;15727014;15727014;15727014;15727192;15728079;15728079;15728079;15728267;15728267;15728267;15728669;15728669;15728669;15729102;15729102;15729102;157…	15684618;15684618;15684618;15684618;15716343;15716343;15716343;15716343;15716816;15716816;15716816;15717992;15717992;15717992;15717992;15718625;15718625;15718625;15718625;15719920;15719869;15719920;15719920;15721388;15721388;15725545;15725545;15725545;15727068;15727832;15727832;15727832;15728148;15728148;15728148;15728357;15728357;15728357;15728733;15728733;15728733;15729190;15729190;15729190;157…	+;+;+;+;+;+;+;+;+;+;+;+;+;+;+;+;+;+;+;+;+;+;+;+;+;+;+;+;+;+;+;+;+;+;+;+;+;+;+;+;+;+;+;+;+;+;+;+;+;+;+;+;+;+;+;+;+;+;+;+;+;+;+;+;+;+;+;+;+;+;+;+	4134	715	292	257	458	585	1012	861	366	668	821	994	794	298	736	807	730	202	470	449	887	689	803	544	431	549	879	1045	814	516	683	587	1010	1179	1006	427	727	517	800	815	667	633	812	890	615
ENSG00000237938.5	chr1;chr1;chr1;chr1;chr1;chr1;chr1;chr1;chr1;chr1;chr1;chr1	15720312;15720737;15720812;15722719;15723203;15723203;15723203;15725593;15732387;15732387;15732387;15736861	15720595;15720994;15720994;15723067;15723353;15723287;15723353;15725872;15732561;15732452;15732452;15736896	-;-;-;-;-;-;-;-;-;-;-;-	1533	30	44	34	45	43	59	59	56	59	37	74	66	13	113	63	56	56	23	30	117	89	48	78	19	45	17	79	28	70	105	38	51	124	63	64	51	75	75	86	49	68	92	78	41
ENSG00000162461.8	chr1;chr1;chr1;chr1;chr1;chr1;chr1;chr1;chr1;chr1;chr1	15736258;15737783;15737929;15738093;15738093;15738594;15738594;15739035;15739224;15739224;15739224	15736863;15737994;15737994;15738245;15738245;15738728;15738728;15739097;15739335;15739562;15741392	+;+;+;+;+;+;+;+;+;+;+	3338	45	16	6	31	46	73	32	71	16	44	34	97	6	77	32	60	72	27	27	16	67	49	128	14	28	29	46	32	49	12	6	68	85	24	33	23	66	79	149	10	36	42	38	29
ENSG00000224459.1	chr1;chr1	15740051;15749430	15740222;15749896	-;-	639	0	0	0	6	0	0	0	3	0	0	0	0	0	0	0	0	4	0	0	0	7	4	10	3	9	0	0	0	0	2	0	11	8	0	0	0	8	0	0	0	0	0	0	0
ENSG00000162460.7	chr1;chr1;chr1;chr1;chr1;chr1;chr1;chr1;chr1	15742499;15742547;15742835;15743020;15743020;15744160;15744160;15746867;15747546	15742647;15742647;15742907;15743194;15743194;15744580;15744580;15747054;15747982	+;+;+;+;+;+;+;+;+	1443	0	0	0	0	5	0	0	30	0	1	4	0	0	3	0	18	8	0	0	3	35	0	62	5	18	1	5	0	4	0	27	0	0	1	0	0	53	0	0	0	0	0	1	3
ENSG00000162458.13	chr1;chr1;chr1;chr1;chr1;chr1;chr1;chr1;chr1;chr1;chr1;chr1;chr1;chr1;chr1;chr1;chr1;chr1;chr1;chr1;chr1;chr1;chr1;chr1;chr1;chr1;chr1;chr1;chr1;chr1;chr1;chr1;chr1;chr1;chr1;chr1;chr1;chr1;chr1;chr1;chr1;chr1;chr1;chr1;chr1;chr1;chr1;chr1;chr1;chr1;chr1;chr1;chr1;chr1;chr1;chr1;chr1;chr1;chr1;chr1;chr1;chr1;chr1;chr1;chr1;chr1;chr1;chr1;chr1;chr1;chr1;chr1	15756607;15756617;15756641;15756644;15756659;15757946;15757947;15758174;15758174;15758174;15758174;15758174;15758174;15758174;15758784;15758793;15758795;15758797;15764493;15764493;15764493;15764493;15764496;15764496;15764496;15764496;15764496;15764496;15764496;15764499;15764953;15764964;15764964;15764964;15764964;15764964;15764964;15764964;15764964;15764964;15764964;15764964;15764964;15767376;157…	15756732;15756732;15756728;15756732;15756732;15758043;15758043;15758329;15758355;15758329;15758329;15758355;15758355;15758355;15758848;15758848;15758848;15758848;15764685;15764685;15764685;15764685;15764685;15764547;15764547;15764685;15764685;15764547;15764685;15764685;15765233;15765233;15765233;15765233;15765233;15765233;15765027;15765076;15765233;15765217;15765035;15765073;15765086;15767563;157…	+;+;+;+;+;+;+;+;+;+;+;+;+;+;+;+;+;+;+;+;+;+;+;+;+;+;+;+;+;+;+;+;+;+;+;+;+;+;+;+;+;+;+;+;+;+;+;+;+;+;+;+;+;+;+;+;+;+;+;+;+;+;+;+;+;+;+;+;+;+;+;+	4351	509	280	108	173	180	815	440	247	684	212	252	420	183	196	166	202	117	229	454	173	297	307	312	189	446	482	414	239	355	408	309	476	605	482	255	382	284	195	316	149	310	137	263	165
ENSG00000224321.1	chr1	15792796	15793285	+	490	5	3	0	1	1	2	12	71	4	0	2	2	0	3	0	29	94	0	0	0	94	1	116	2	3	5	11	5	4	1	7	1	2	6	21	0	50	1	8	2	1	10	0	8
ENSG00000233954.6	chr1	15807169	15809348	-	2180	112	142	66	123	292	287	186	87	105	80	239	135	23	104	162	61	62	90	213	193	119	83	88	37	1007	80	102	89	114	130	206	102	181	86	80	126	77	75	125	233	104	110	82	48
ENSG00000178715.8	chr1	15828232	15828669	+	438	5	4	7	9	20	23	8	11	9	3	14	21	4	24	8	6	21	3	11	6	10	12	13	5	24	7	4	7	20	14	3	21	6	28	10	27	15	18	13	14	17	29	12	17
ENSG00000179743.4	chr1;chr1	15834474;15848108	15836906;15848147	-;-	2473	33	12	8	8	51	81	25	52	4	24	71	28	1	63	17	47	56	61	29	30	92	28	114	9	17	31	34	6	16	47	43	6	39	23	19	36	71	15	13	68	36	24	61	43
ENSG00000065526.12	chr1;chr1;chr1;chr1;chr1;chr1;chr1;chr1;chr1;chr1;chr1;chr1;chr1;chr1;chr1;chr1;chr1;chr1;chr1;chr1;chr1;chr1;chr1;chr1;chr1;chr1;chr1;chr1;chr1;chr1;chr1;chr1;chr1;chr1;chr1;chr1;chr1;chr1;chr1;chr1;chr1;chr1	15836095;15847707;15867879;15872816;15872816;15873502;15873502;15876202;15876202;15876202;15876202;15876576;15909321;15909321;15909321;15909324;15911101;15911101;15911101;15911101;15916128;15916128;15916128;15918926;15918926;15918926;15919404;15919404;15919404;15920870;15920870;15920870;15922249;15922249;15928091;15928091;15937163;15937812;15938583;15938718;15939296;15939296	15836885;15848150;15867976;15873136;15873136;15874395;15874395;15876678;15876711;15876678;15876678;15876678;15909481;15909481;15909481;15909481;15911301;15911301;15911301;15911301;15916279;15916279;15916279;15919051;15919051;15919051;15919517;15919517;15919517;15920906;15920983;15920983;15922349;15922349;15936266;15928557;15937645;15938006;15938876;15938876;15939544;15940456	+;+;+;+;+;+;+;+;+;+;+;+;+;+;+;+;+;+;+;+;+;+;+;+;+;+;+;+;+;+;+;+;+;+;+;+;+;+;+;+;+;+	14336	3903	1833	1659	2415	3541	5565	5748	1578	5287	2853	4043	4150	887	5749	5741	2019	1148	3809	2369	3932	2581	4540	1087	1635	5141	3538	4043	4719	3928	4035	4799	4069	4310	4592	2235	3492	1638	2682	2962	4971	2500	2624	5484	2946
ENSG00000270620.1	chr1	15917698	15917908	-	211	7	3	11	8	12	3	12	9	47	0	5	5	0	24	27	1	28	1	3	32	5	8	9	0	3	0	8	13	17	12	0	21	15	15	1	0	16	5	6	39	0	0	8	6
ENSG00000116809.12	chr1;chr1;chr1;chr1;chr1;chr1;chr1;chr1;chr1;chr1;chr1;chr1;chr1;chr1;chr1;chr1;chr1;chr1;chr1;chr1;chr1;chr1;chr1;chr1;chr1;chr1;chr1;chr1;chr1;chr1;chr1;chr1;chr1;chr1;chr1;chr1;chr1;chr1;chr1;chr1;chr1;chr1;chr1;chr1;chr1;chr1;chr1;chr1;chr1;chr1;chr1;chr1;chr1;chr1;chr1;chr1;chr1;chr1;chr1;chr1;chr1;chr1;chr1;chr1;chr1;chr1;chr1;chr1;chr1;chr1;chr1;chr1;chr1;chr1;chr1;chr1;chr1;chr1;chr1;chr1…	15941869;15941869;15941869;15941871;15941871;15942331;15942331;15942331;15942331;15942331;15942407;15942529;15942529;15942529;15942529;15942529;15942756;15943064;15943064;15943064;15943064;15943064;15943064;15943240;15943257;15943399;15943399;15943399;15943399;15943429;15943599;15943599;15943599;15943599;15943599;15943599;15943599;15943599;15943808;15943808;15943808;15943808;15943808;15944300;159…	15942252;15942252;15942252;15942252;15942252;15942441;15942420;15942420;15942441;15942722;15942420;15942738;15942738;15942738;15942738;15942738;15942901;15943384;15943194;15943194;15943194;15943194;15943089;15943519;15943519;15943519;15943519;15943519;15943519;15943519;15943715;15943895;15943715;15943926;15943715;15943715;15943715;15943715;15944393;15943895;15943895;15943895;15943895;15944403;159…	-;-;-;-;-;-;-;-;-;-;-;-;-;-;-;-;-;-;-;-;-;-;-;-;-;-;-;-;-;-;-;-;-;-;-;-;-;-;-;-;-;-;-;-;-;-;-;-;-;-;-;-;-;-;-;-;-;-;-;-;-;-;-;-;-;-;-;-;-;-;-;-;-;-;-;-;-;-;-;-;-;-;-;-;-;-;-;-;-;-;-;-;-	4240	202	143	107	143	228	493	324	158	481	300	376	275	112	331	310	96	159	175	251	348	339	297	265	111	317	370	358	315	279	247	214	330	400	363	147	169	271	257	241	301	151	312	262	229
ENSG00000234607.2	chr1	15969632	15970194	+	563	5	12	0	2	0	10	1	11	30	36	5	17	0	22	29	20	9	11	16	12	25	5	40	1	11	3	5	1	5	19	0	5	14	32	3	11	19	8	13	60	5	1	33	12
ENSG00000231353.1	chr1	15988182	15988441	+	260	0	0	0	0	0	0	0	19	0	0	0	0	0	0	0	0	0	0	0	0	40	0	18	0	0	0	0	0	0	0	0	0	0	0	2	0	6	0	0	0	0	0	0	2
ENSG00000275503.1	chr1	15989140	15989375	-	236	0	0	0	0	0	0	0	55	0	0	0	0	0	0	0	20	15	0	0	0	12	0	60	0	0	0	1	0	11	0	0	0	4	2	0	0	33	0	8	0	0	0	0	0
ENSG00000224966.4	chr1;chr1;chr1;chr1;chr1;chr1;chr1;chr1	15989871;15990671;15991151;15991678;15992163;15993296;15993561;15994682	15989991;15990765;15991216;15991777;15992310;15993476;15993741;15994751	+;+;+;+;+;+;+;+	962	0	0	0	0	0	0	0	27	0	0	0	0	0	0	0	20	15	0	0	0	62	0	62	1	0	0	2	0	0	0	0	2	0	7	4	0	41	1	0	0	0	0	0	0
ENSG00000183888.4	chr1;chr1	16004236;16005919	16004385;16008807	+;+	3039	208	4	5	96	9	53	375	120	496	94	84	95	79	33	444	88	61	301	119	4	102	64	164	22	0	65	104	13	380	237	62	2	23	336	50	39	61	150	91	158	121	391	394	254
ENSG00000233078.1	chr1;chr1	16006160;16006393	16006346;16006671	-;-	466	0	0	0	0	0	0	0	0	0	0	0	0	0	0	0	0	0	0	0	0	0	0	0	0	0	0	0	0	0	0	0	0	0	0	0	0	0	0	0	0	0	0	0	0
ENSG00000173641.18	chr1;chr1;chr1;chr1;chr1;chr1;chr1;chr1;chr1;chr1;chr1;chr1;chr1;chr1;chr1;chr1;chr1;chr1;chr1;chr1;chr1	16014028;16014028;16014028;16014029;16015374;16015374;16015499;16017074;16017074;16017074;16017074;16017074;16017089;16017089;16017765;16017765;16017765;16017765;16017765;16017765;16019134	16015759;16015759;16015759;16015759;16015759;16015759;16015759;16017219;16017222;16017207;16017207;16018043;16017222;16017207;16018073;16018005;16017825;16018043;16018041;16017852;16019594	-;-;-;-;-;-;-;-;-;-;-;-;-;-;-;-;-;-;-;-;-	3193	152	93	19	84	17	132	173	189	750	243	68	96	110	70	205	383	108	88	39	26	202	65	185	54	6	86	284	437	211	458	135	279	97	130	89	94	157	430	1337	106	84	74	418	87
ENSG00000186510.12	chr1;chr1;chr1;chr1;chr1;chr1;chr1;chr1;chr1;chr1;chr1;chr1;chr1;chr1;chr1;chr1;chr1;chr1;chr1;chr1;chr1;chr1;chr1;chr1;chr1;chr1;chr1;chr1;chr1;chr1;chr1;chr1;chr1;chr1;chr1;chr1;chr1;chr1;chr1;chr1;chr1;chr1;chr1;chr1;chr1;chr1;chr1;chr1;chr1;chr1;chr1;chr1;chr1;chr1;chr1;chr1;chr1;chr1;chr1;chr1;chr1;chr1;chr1;chr1;chr1;chr1;chr1;chr1;chr1;chr1;chr1;chr1;chr1;chr1;chr1;chr1;chr1;chr1;chr1;chr1…	16018875;16020036;16021030;16021031;16021297;16021297;16021620;16021871;16021913;16021991;16021991;16022014;16022036;16022613;16022613;16022613;16022613;16022613;16023800;16023800;16023800;16023800;16023800;16024763;16024763;16024763;16024859;16026108;16026108;16026108;16026108;16026108;16026536;16026536;16026536;16026536;16026536;16026697;16026697;16026697;16026697;16026839;16027310;16027310;160…	16018974;16020233;16021094;16021094;16021513;16021513;16021737;16021918;16022063;16022063;16022063;16022063;16022063;16022719;16022719;16022719;16022719;16022719;16023928;16023928;16023928;16023928;16023928;16024891;16024891;16024891;16024891;16026247;16026257;16026247;16026247;16026247;16026613;16026613;16026596;16026613;16026613;16026775;16026775;16026775;16026775;16026909;16027435;16027435;160…	+;+;+;+;+;+;+;+;+;+;+;+;+;+;+;+;+;+;+;+;+;+;+;+;+;+;+;+;+;+;+;+;+;+;+;+;+;+;+;+;+;+;+;+;+;+;+;+;+;+;+;+;+;+;+;+;+;+;+;+;+;+;+;+;+;+;+;+;+;+;+;+;+;+;+;+;+;+;+;+;+;+;+;+;+;+;+;+;+;+;+;+;+;+;+;+;+;+;+;+;+	3476	52	4	2	38	0	77	21	160	124	10	29	9	24	14	149	93	164	0	3	2	215	19	295	11	41	18	30	16	56	120	166	8	32	69	22	26	217	32	18	149	8	54	225	46
ENSG00000232456.1	chr1;chr1;chr1;chr1;chr1	16035178;16036236;16036612;16039603;16039994	16035458;16036346;16036793;16039696;16040029	-;-;-;-;-	704	0	0	0	3	0	2	0	12	0	0	0	0	1	0	1	5	36	0	0	0	32	0	29	0	0	0	0	0	0	0	0	0	0	0	0	0	10	0	0	0	0	0	3	0
ENSG00000184908.18	chr1;chr1;chr1;chr1;chr1;chr1;chr1;chr1;chr1;chr1;chr1;chr1;chr1;chr1;chr1;chr1;chr1;chr1;chr1;chr1;chr1;chr1;chr1;chr1;chr1;chr1;chr1;chr1;chr1;chr1;chr1;chr1;chr1;chr1;chr1;chr1;chr1;chr1;chr1;chr1;chr1;chr1;chr1;chr1;chr1;chr1;chr1;chr1;chr1;chr1;chr1;chr1	16043736;16043782;16044486;16044486;16045558;16045558;16046535;16046535;16047905;16047905;16048343;16048343;16048504;16048504;16048789;16049120;16049618;16049618;16049815;16049815;16050516;16050516;16050516;16050875;16050875;16050875;16051478;16051478;16051478;16051710;16051710;16051710;16052198;16052198;16052198;16052323;16053639;16053639;16053639;16053639;16055435;16055435;16055435;16055675;160…	16043880;16043880;16044592;16044592;16045686;16045686;16046663;16046663;16048044;16048044;16048420;16048420;16048582;16048514;16049245;16049245;16049702;16049702;16049916;16049916;16050600;16050600;16050600;16051048;16051048;16051048;16051547;16051547;16051547;16051820;16051820;16051820;16052411;16052411;16052411;16052411;16053772;16053772;16053772;16053690;16055523;16055523;16055523;16055758;160…	+;+;+;+;+;+;+;+;+;+;+;+;+;+;+;+;+;+;+;+;+;+;+;+;+;+;+;+;+;+;+;+;+;+;+;+;+;+;+;+;+;+;+;+;+;+;+;+;+;+;+;+	2939	1	2	0	0	0	6	0	86	6	3	1	18	6	0	3	26	18	7	0	0	290	2	219	1	0	3	31	1	16	0	19	2	3	0	7	1	180	0	0	4	7	3	4	3
ENSG00000185519.9	chr1;chr1;chr1;chr1;chr1;chr1;chr1;chr1;chr1;chr1;chr1;chr1;chr1	16057769;16058279;16059494;16059494;16059869;16059869;16062099;16062099;16062499;16062499;16063521;16073421;16073421	16058717;16058717;16059604;16059604;16060051;16060051;16062192;16062192;16062534;16062534;16063636;16073632;16073651	-;-;-;-;-;-;-;-;-;-;-;-;-	1720	0	0	0	3	0	11	4	41	0	0	0	0	14	0	0	27	26	4	0	0	46	0	51	6	0	0	3	1	2	0	31	0	0	6	1	6	20	0	0	0	4	7	1	0
ENSG00000142627.13	chr1;chr1;chr1;chr1;chr1;chr1;chr1;chr1;chr1;chr1;chr1;chr1;chr1;chr1;chr1;chr1;chr1;chr1;chr1;chr1;chr1;chr1;chr1;chr1;chr1;chr1;chr1	16124337;16129434;16130226;16131721;16132064;16132378;16133013;16133180;16133481;16133481;16133860;16134468;16134560;16135036;16135036;16135655;16135655;16137853;16137853;16138275;16138275;16146423;16148378;16148378;16150896;16155848;16155848	16125320;16129589;16130419;16131870;16132273;16132439;16133368;16133368;16133562;16133606;16133915;16134567;16134567;16135189;16135189;16135770;16135770;16138185;16138185;16138430;16138430;16146450;16149047;16149047;16150963;16156052;16156069	-;-;-;-;-;-;-;-;-;-;-;-;-;-;-;-;-;-;-;-;-;-;-;-;-;-;-	4141	145	101	70	151	155	118	316	193	143	246	123	196	68	52	57	152	124	171	49	154	248	122	297	86	190	300	497	300	150	207	129	426	200	227	91	114	182	157	234	33	112	26	273	47
ENSG00000227959.1	chr1;chr1	16155211;16156971	16155755;16157329	+;+	904	2	25	1	8	1	3	12	28	3	4	4	0	3	3	0	23	48	10	0	2	40	1	70	0	1	10	66	6	3	18	2	25	2	36	13	6	62	1	0	2	11	0	23	5
ENSG00000224621.1	chr1;chr1	16159266;16161501	16159426;16161883	+;+	544	7	1	0	8	0	0	7	31	8	0	0	8	0	0	29	25	17	0	0	0	60	0	56	0	0	3	5	21	27	0	32	10	8	7	9	3	29	6	0	0	0	0	6	8
ENSG00000234166.1	chr1;chr1	16197854;16198282	16198216;16198357	+;+	439	0	0	0	0	0	0	0	0	0	0	0	0	0	0	0	0	0	0	0	0	0	0	0	0	0	0	0	0	0	0	0	0	0	0	0	0	0	0	0	0	0	0	0	0
ENSG00000142632.17	chr1;chr1;chr1;chr1;chr1;chr1;chr1;chr1;chr1;chr1;chr1;chr1;chr1;chr1;chr1;chr1;chr1;chr1;chr1;chr1;chr1;chr1;chr1;chr1;chr1;chr1;chr1;chr1;chr1;chr1;chr1;chr1;chr1;chr1;chr1;chr1;chr1;chr1;chr1;chr1;chr1;chr1;chr1	16197854;16197854;16199150;16199150;16201782;16201782;16202416;16202416;16204759;16204759;16204811;16204900;16205087;16205087;16205087;16205087;16205351;16205351;16205351;16205351;16205538;16205538;16205538;16205627;16205849;16205931;16205931;16205931;16205931;16206180;16206180;16206180;16206180;16206180;16206180;16206948;16206948;16206948;16207522;16207675;16207944;16208643;16212502	16198744;16198744;16199254;16199254;16201861;16201861;16202574;16202540;16204919;16204919;16204919;16204919;16205176;16205176;16205176;16205176;16205425;16205425;16205425;16205425;16205667;16205667;16205667;16206083;16206083;16206083;16206083;16206083;16206083;16206526;16206526;16206340;16206543;16206340;16206340;16206982;16207210;16207011;16207598;16207777;16208225;16209083;16212652	-;-;-;-;-;-;-;-;-;-;-;-;-;-;-;-;-;-;-;-;-;-;-;-;-;-;-;-;-;-;-;-;-;-;-;-;-;-;-;-;-;-;-	3788	138	106	62	67	62	539	119	146	73	97	151	439	40	30	269	175	119	132	78	119	217	163	265	53	514	261	214	37	38	82	431	84	224	182	61	55	111	122	61	433	88	96	327	90
ENSG00000237276.8	chr1;chr1;chr1;chr1;chr1;chr1;chr1;chr1;chr1;chr1;chr1;chr1;chr1;chr1;chr1;chr1;chr1;chr1;chr1;chr1;chr1;chr1	16215909;16216457;16216469;16216469;16217127;16217127;16217127;16217700;16218128;16218378;16218581;16219068;16219406;16220214;16220823;16221057;16225187;16225590;16225807;16225950;16226245;16227922	16216061;16216609;16216609;16216609;16217223;16217328;16217160;16217817;16218268;16218503;16218617;16219162;16219426;16220280;16220887;16221119;16225489;16225654;16225862;16226069;16226343;16228027	-;-;-;-;-;-;-;-;-;-;-;-;-;-;-;-;-;-;-;-;-;-	1990	19	1	0	21	82	58	2	171	0	5	31	13	47	17	42	95	98	27	4	0	267	17	280	20	9	21	54	21	87	8	254	13	8	8	48	20	167	6	18	34	16	21	6	11
ENSG00000288398.1	chr1	16228674	16231335	-	2662	145	15	22	42	176	72	73	122	130	15	257	67	31	225	132	72	123	32	77	11	153	102	135	46	58	57	63	62	170	42	110	37	82	40	67	45	150	53	44	132	18	50	64	46
ENSG00000132881.12	chr1;chr1;chr1;chr1;chr1;chr1;chr1;chr1;chr1	16231692;16232281;16232510;16232510;16232893;16233612;16233612;16236631;16236631	16232297;16232297;16232646;16232646;16233017;16233764;16233764;16237183;16236659	-;-;-;-;-;-;-;-;-	1574	47	53	4	65	74	95	64	51	47	56	89	14	26	80	69	26	26	48	14	47	87	33	91	10	5	37	28	20	85	22	68	54	25	27	45	75	88	38	21	61	6	27	46	40
ENSG00000233929.1	chr1	16241213	16241398	-	186	2	1	18	2	0	5	0	8	9	3	11	1	25	0	3	3	6	1	10	4	0	8	15	2	2	7	11	2	0	2	2	2	4	2	13	1	11	2	17	0	2	0	0	3
ENSG00000037637.11	chr1;chr1;chr1;chr1;chr1;chr1;chr1;chr1;chr1;chr1;chr1;chr1;chr1;chr1;chr1;chr1;chr1;chr1;chr1;chr1	16246840;16251082;16251082;16252288;16252288;16252288;16253096;16253096;16253096;16253556;16253635;16255711;16256606;16292314;16294783;16305803;16305803;16315169;16315169;16352255	16251785;16251785;16251785;16252404;16252404;16252404;16253181;16253152;16253427;16253593;16253731;16255821;16256759;16294917;16294917;16305919;16305919;16315367;16315435;16352480	-;-;-;-;-;-;-;-;-;-;-;-;-;-;-;-;-;-;-;-	9009	575	239	234	379	361	644	633	513	530	292	500	415	93	614	917	466	295	456	358	346	590	400	400	118	617	418	541	688	428	397	314	491	838	541	221	544	287	356	444	980	414	442	533	234
ENSG00000055070.17	chr1;chr1;chr1;chr1;chr1;chr1;chr1;chr1;chr1;chr1;chr1;chr1;chr1;chr1;chr1;chr1;chr1;chr1;chr1;chr1;chr1;chr1;chr1;chr1;chr1;chr1;chr1;chr1;chr1;chr1;chr1;chr1;chr1;chr1;chr1;chr1;chr1;chr1;chr1;chr1	16352575;16353300;16367088;16367225;16367235;16367242;16367243;16367243;16367247;16367265;16367711;16387055;16387055;16387502;16390550;16391375;16391375;16391375;16391375;16391375;16391375;16391375;16393228;16393228;16393228;16393228;16393228;16393228;16393231;16393231;16393231;16393231;16395038;16395038;16395038;16395038;16395038;16395038;16395038;16395038	16352812;16353423;16367308;16367308;16367308;16367308;16367308;16367308;16367308;16367308;16368015;16387125;16387125;16387794;16390626;16391424;16391424;16391424;16391424;16391424;16391424;16391424;16393482;16393482;16393385;16393482;16393482;16393355;16393482;16393482;16393482;16393482;16398142;16395390;16395273;16395172;16398145;16395139;16398145;16395406	+;+;+;+;+;+;+;+;+;+;+;+;+;+;+;+;+;+;+;+;+;+;+;+;+;+;+;+;+;+;+;+;+;+;+;+;+;+;+;+	4742	634	329	315	417	722	1122	895	244	536	560	921	901	238	913	921	411	177	678	523	461	442	695	259	279	953	609	656	593	520	594	669	623	1032	573	334	577	300	522	530	683	560	552	550	442
ENSG00000226457.1	chr1	16369150	16369530	-	381	2	3	0	6	33	2	7	41	16	3	3	42	1	11	32	5	3	25	1	4	35	11	25	7	19	0	23	7	6	17	0	5	12	4	2	8	19	19	6	8	9	13	6	3
ENSG00000187144.11	chr1;chr1;chr1;chr1;chr1;chr1;chr1;chr1;chr1;chr1;chr1;chr1;chr1;chr1;chr1;chr1;chr1;chr1;chr1;chr1;chr1;chr1;chr1;chr1;chr1;chr1;chr1;chr1;chr1;chr1;chr1;chr1;chr1;chr1;chr1;chr1;chr1;chr1;chr1;chr1;chr1;chr1;chr1;chr1;chr1;chr1;chr1;chr1;chr1;chr1;chr1;chr1;chr1;chr1;chr1	16387117;16395681;16396558;16398643;16398667;16399344;16399344;16399344;16399344;16400482;16400720;16400720;16400720;16400720;16403727;16403727;16403727;16403727;16403968;16403968;16403968;16403968;16404967;16404967;16404967;16408498;16409118;16409118;16409118;16409601;16409601;16409601;16410778;16410778;16421509;16421911;16421911;16424904;16425097;16425524;16425524;16425524;16425524;16427864;164…	16387301;16396312;16396746;16398822;16398822;16399521;16399521;16399521;16399521;16400635;16400892;16400892;16400892;16400892;16403844;16403844;16403844;16403844;16404039;16404039;16404039;16403974;16405104;16405104;16405104;16408705;16409203;16409203;16409203;16410043;16410043;16410043;16410915;16410915;16421557;16421971;16422194;16425210;16425210;16425731;16425731;16425731;16425731;16428015;164…	-;-;-;-;-;-;-;-;-;-;-;-;-;-;-;-;-;-;-;-;-;-;-;-;-;-;-;-;-;-;-;-;-;-;-;-;-;-;-;-;-;-;-;-;-;-;-;-;-;-;-;-;-;-;-	4506	29	17	39	28	18	12	10	167	9	24	0	5	1	6	7	44	57	35	3	11	253	2	258	0	0	0	11	3	64	3	0	38	0	37	44	0	150	28	21	1	32	10	19	12
ENSG00000157191.20	chr1;chr1;chr1;chr1;chr1;chr1;chr1;chr1;chr1;chr1;chr1;chr1;chr1;chr1;chr1;chr1;chr1;chr1;chr1;chr1;chr1;chr1;chr1;chr1;chr1;chr1;chr1;chr1;chr1;chr1;chr1;chr1;chr1;chr1;chr1;chr1;chr1;chr1;chr1;chr1;chr1;chr1;chr1;chr1;chr1;chr1;chr1;chr1;chr1;chr1;chr1;chr1;chr1;chr1;chr1;chr1;chr1;chr1;chr1;chr1;chr1;chr1;chr1;chr1;chr1;chr1;chr1;chr1;chr1;chr1;chr1;chr1;chr1;chr1;chr1	16440721;16440724;16440724;16440736;16440736;16440737;16440742;16440743;16440756;16440758;16440772;16441166;16443632;16443632;16443632;16443632;16443632;16443632;16443632;16443632;16443632;16447870;16447870;16447870;16447870;16447870;16447870;16447870;16447870;16447870;16448060;16448060;16448060;16448060;16448060;16448060;16448060;16448249;16449093;16449093;16449093;16449093;16449093;16449093;164…	16440853;16440853;16440775;16440853;16440853;16440853;16440853;16440853;16440853;16440853;16440853;16441619;16443732;16443732;16443732;16443732;16443732;16443732;16443732;16443732;16443732;16447974;16447974;16447974;16447974;16447942;16447974;16447974;16447974;16447974;16448141;16448141;16448141;16448141;16448141;16448141;16448141;16448350;16449201;16452015;16449201;16449201;16449201;16449201;164…	+;+;+;+;+;+;+;+;+;+;+;+;+;+;+;+;+;+;+;+;+;+;+;+;+;+;+;+;+;+;+;+;+;+;+;+;+;+;+;+;+;+;+;+;+;+;+;+;+;+;+;+;+;+;+;+;+;+;+;+;+;+;+;+;+;+;+;+;+;+;+;+;+;+;+	5510	488	253	175	540	553	752	660	339	452	582	436	614	120	585	641	423	168	372	351	576	433	418	406	135	703	502	489	517	436	413	371	486	702	569	334	420	364	366	327	674	376	561	485	402
ENSG00000226029.1	chr1;chr1	16460948;16467577	16463287;16468481	+;+	3245	104	64	28	64	40	49	63	79	214	95	83	93	12	112	153	101	67	169	28	39	158	129	109	20	178	44	70	133	167	97	21	139	215	124	86	71	107	101	53	162	129	60	96	44
ENSG00000080947.15	chr1;chr1;chr1;chr1;chr1;chr1;chr1;chr1;chr1;chr1;chr1;chr1;chr1;chr1;chr1;chr1;chr1;chr1;chr1;chr1;chr1;chr1;chr1;chr1;chr1;chr1;chr1;chr1;chr1;chr1;chr1;chr1;chr1;chr1;chr1;chr1;chr1;chr1;chr1;chr1;chr1;chr1;chr1;chr1;chr1;chr1;chr1;chr1;chr1;chr1;chr1	16467436;16468922;16474396;16475825;16475825;16475916;16476399;16476399;16476399;16476930;16476930;16476930;16476930;16478255;16478255;16478255;16483287;16483287;16483287;16483287;16484233;16484233;16484233;16484823;16484823;16485569;16485569;16485569;16486426;16486426;16489685;16489685;16490618;16490618;16490618;16490634;16490646;16490865;16490865;16490865;16490865;16490865;16491010;16491010;164…	16470127;16469007;16474489;16476062;16476062;16476055;16476504;16476504;16476504;16477074;16478437;16477074;16477074;16478437;16478437;16478437;16483341;16483486;16483486;16483486;16484464;16484464;16484464;16484906;16484906;16485665;16485665;16485665;16486661;16486661;16489791;16489791;16490783;16490783;16490783;16490783;16490783;16490926;16490926;16490926;16490926;16490926;16491316;16491094;164…	-;-;-;-;-;-;-;-;-;-;-;-;-;-;-;-;-;-;-;-;-;-;-;-;-;-;-;-;-;-;-;-;-;-;-;-;-;-;-;-;-;-;-;-;-;-;-;-;-;-;-	6905	432	196	68	197	331	202	383	215	391	320	526	264	96	553	396	372	211	138	94	253	356	248	389	85	275	389	380	381	405	352	319	490	438	575	218	248	252	309	283	428	260	158	449	243
ENSG00000206652.1	chr1	16514122	16514285	-	164	230	85	268	153	177	147	142	61	202	112	202	175	47	355	174	117	57	232	465	122	96	207	32	72	173	170	160	131	122	108	250	93	132	126	83	305	48	262	121	170	71	185	319	137
ENSG00000261135.1	chr1	16514645	16515754	+	1110	0	0	0	0	0	0	0	1	0	0	0	0	0	0	0	3	18	0	0	0	13	0	4	0	0	0	0	0	1	1	1	17	0	0	0	0	4	0	0	0	0	0	1	0
ENSG00000285853.1	chr1;chr1;chr1	16515034;16520732;16521564	16516310;16520787;16521788	+;+;+	1558	0	0	0	0	0	0	0	2	0	0	0	0	0	0	0	0	0	0	0	0	9	0	10	0	0	0	1	0	0	0	0	0	0	0	0	0	7	0	0	0	0	0	0	0
ENSG00000224174.2	chr1;chr1	16520694;16521564	16520787;16521796	+;+	327	0	0	0	0	0	0	0	2	0	0	0	0	0	0	0	0	0	0	0	0	0	0	0	0	0	0	0	0	0	0	0	0	0	0	0	0	1	0	0	0	0	0	0	0
ENSG00000233421.4	chr1;chr1;chr1;chr1	16533886;16534426;16535342;16535780	16534209;16535649;16535776;16536172	-;-;-;-	2068	0	2	2	10	26	10	0	36	0	65	1	0	0	0	0	45	0	4	2	1	67	4	91	0	4	0	2	1	2	0	1	4	3	2	25	0	45	6	10	3	16	2	0	2
ENSG00000277344.1	chr1	16534081	16534224	-	144	0	0	0	0	0	0	0	0	0	0	0	0	0	0	0	0	0	0	0	0	0	0	0	0	0	0	0	0	0	0	0	0	0	0	0	0	0	0	0	0	0	0	0	0
ENSG00000225710.1	chr1;chr1;chr1	16548651;16550701;16552415	16548886;16551229;16552531	-;-;-	882	0	0	0	0	1	0	0	19	0	0	1	0	0	0	3	3	43	0	0	0	41	0	93	2	0	0	6	0	0	0	0	27	0	0	8	0	51	0	0	11	0	0	0	2
ENSG00000219481.10	chr1;chr1;chr1;chr1;chr1;chr1;chr1;chr1;chr1;chr1;chr1;chr1;chr1;chr1;chr1;chr1;chr1;chr1;chr1;chr1;chr1;chr1;chr1;chr1;chr1;chr1;chr1;chr1;chr1;chr1;chr1;chr1;chr1;chr1;chr1;chr1;chr1;chr1;chr1;chr1;chr1;chr1;chr1;chr1;chr1;chr1;chr1;chr1;chr1;chr1;chr1;chr1;chr1;chr1;chr1;chr1;chr1;chr1;chr1;chr1;chr1;chr1;chr1;chr1;chr1;chr1;chr1;chr1;chr1;chr1;chr1;chr1;chr1;chr1;chr1;chr1;chr1;chr1;chr1;chr1…	16562319;16564018;16564807;16564807;16564853;16565633;16565633;16565637;16566408;16566408;16566408;16567179;16567179;16567179;16567979;16567979;16567979;16569073;16569073;16569073;16573142;16573142;16573142;16574487;16574487;16574487;16575157;16575157;16575157;16576267;16576267;16576267;16577317;16577317;16577317;16579193;16579193;16579193;16580745;16580745;16580745;16581420;16581420;16581420;165…	16564186;16564186;16564865;16564918;16564918;16565805;16565805;16565805;16566459;16566459;16566459;16567351;16567351;16567351;16568030;16568030;16568030;16569236;16569236;16569236;16573193;16573193;16573193;16574692;16574692;16574692;16575229;16575229;16575229;16576481;16576481;16576481;16577419;16577419;16577419;16579402;16579402;16579402;16580956;16580956;16580956;16581492;16581492;16581492;165…	-;-;-;-;-;-;-;-;-;-;-;-;-;-;-;-;-;-;-;-;-;-;-;-;-;-;-;-;-;-;-;-;-;-;-;-;-;-;-;-;-;-;-;-;-;-;-;-;-;-;-;-;-;-;-;-;-;-;-;-;-;-;-;-;-;-;-;-;-;-;-;-;-;-;-;-;-;-;-;-;-;-;-;-;-;-;-;-	12212	335	234	78	300	325	577	347	864	256	590	243	290	108	423	453	651	473	262	306	244	1096	327	1229	156	752	258	657	388	439	355	216	473	850	417	412	281	827	361	451	547	326	455	232	125
ENSG00000271732.1	chr1	16617391	16617729	+	339	0	2	0	12	5	14	0	60	0	0	15	0	4	52	56	41	40	80	0	0	69	2	64	3	10	0	18	0	2	0	0	0	0	0	4	0	60	12	0	7	27	8	2	0
ENSG00000215908.10	chr1;chr1;chr1;chr1;chr1;chr1;chr1;chr1;chr1;chr1;chr1;chr1;chr1;chr1;chr1;chr1;chr1;chr1;chr1;chr1;chr1;chr1;chr1;chr1;chr1;chr1;chr1;chr1;chr1;chr1;chr1;chr1;chr1;chr1;chr1;chr1;chr1;chr1;chr1;chr1;chr1;chr1;chr1;chr1;chr1;chr1;chr1;chr1;chr1;chr1;chr1;chr1;chr1;chr1;chr1;chr1;chr1;chr1;chr1;chr1;chr1;chr1;chr1;chr1	16618253;16618256;16618256;16618273;16618969;16619845;16619845;16619845;16619845;16621946;16623870;16624273;16625375;16625775;16625775;16625775;16625775;16625775;16626353;16626353;16626353;16626353;16626353;16626353;16627145;16627145;16627145;16627145;16627145;16628468;16628468;16628468;16628468;16628468;16629670;16630032;16630890;16630890;16630890;16630890;16631530;16631530;16631530;16631530;166…	16619103;16619103;16619103;16619103;16619103;16620024;16620245;16620038;16620024;16622115;16623997;16624467;16626005;16626005;16626005;16626005;16626005;16626005;16626499;16626499;16626499;16626499;16626499;16626386;16627289;16627289;16627289;16627289;16627289;16628650;16628650;16628650;16628650;16628652;16631109;16630142;16631109;16631109;16631109;16631109;16631613;16631613;16631613;16631613;166…	-;-;-;-;-;-;-;-;-;-;-;-;-;-;-;-;-;-;-;-;-;-;-;-;-;-;-;-;-;-;-;-;-;-;-;-;-;-;-;-;-;-;-;-;-;-;-;-;-;-;-;-;-;-;-;-;-;-;-;-;-;-;-;-	5606	729	189	118	482	673	637	673	625	644	652	502	638	192	520	938	452	319	245	423	478	792	313	1320	198	530	437	655	627	549	423	256	526	866	665	398	274	925	332	336	438	441	451	609	453
ENSG00000283773.1	chr1;chr1	16642767;16643028	16642850;16643109	-;-	166	0	0	0	0	0	0	0	0	0	0	0	0	0	0	0	0	0	0	0	0	0	0	0	0	0	0	0	0	0	0	0	0	0	0	0	0	0	0	0	0	0	0	0	0
ENSG00000186301.8	chr1;chr1;chr1;chr1;chr1;chr1;chr1;chr1;chr1;chr1;chr1;chr1;chr1;chr1;chr1;chr1;chr1;chr1	16645622;16646369;16646597;16646787;16646980;16647198;16647463;16647784;16648068;16648299;16648432;16648756;16648881;16649174;16649379;16649607;16649810;16650074	16645678;16646515;16646709;16646901;16647116;16647318;16647581;16647952;16648198;16648401;16648664;16648792;16649001;16649251;16649525;16649713;16649949;16650289	+;+;+;+;+;+;+;+;+;+;+;+;+;+;+;+;+;+	2291	41	6	2	16	43	52	48	168	42	25	148	33	85	53	58	60	38	32	3	23	276	58	437	14	1	39	101	93	60	21	40	29	49	13	16	18	288	22	53	33	16	43	40	18
ENSG00000282143.1	chr1;chr1;chr1	16656879;16665391;16666941	16656974;16665527;16667524	+;+;+	817	1	0	0	2	0	3	7	10	0	1	0	0	0	0	0	18	6	0	0	0	19	0	34	0	12	0	4	0	1	0	5	0	0	0	0	0	17	0	0	0	5	0	0	2
ENSG00000207513.1	chr1	16666785	16666948	-	164	30	11	4	9	9	6	7	5	72	28	10	5	2	28	18	14	24	34	44	4	6	8	2	13	8	15	50	28	6	19	10	18	5	10	4	8	9	18	13	145	6	9	23	20
ENSG00000280114.1	chr1;chr1;chr1;chr1;chr1	16681097;16681712;16686639;16687327;16688376	16681227;16682244;16686755;16687522;16688749	-;-;-;-;-	1351	3	1	0	0	0	5	0	6	18	0	0	0	1	0	0	1	0	0	0	0	9	0	35	0	3	0	0	0	2	0	0	0	0	1	3	0	18	0	6	0	3	0	0	0
ENSG00000236698.1	chr1	16685621	16686055	-	435	54	108	63	33	78	110	112	19	134	61	122	34	4	86	75	8	26	189	87	35	44	70	6	14	124	50	95	47	67	83	48	34	73	77	35	93	19	52	61	157	46	73	82	58
ENSG00000268869.6	chr1;chr1;chr1;chr1;chr1;chr1;chr1;chr1;chr1;chr1;chr1;chr1;chr1;chr1;chr1;chr1;chr1	16687339;16691113;16692105;16692280;16696431;16696779;16699426;16699859;16702701;16703943;16706924;16707288;16707545;16707892;16707892;16710440;16719964	16687522;16691294;16692309;16694034;16696694;16696924;16699621;16700020;16702972;16704144;16707727;16707419;16707727;16708078;16708078;16710619;16720157	-;-;-;-;-;-;-;-;-;-;-;-;-;-;-;-;-	4903	2	12	0	0	7	29	8	29	26	0	0	1	40	0	5	23	75	2	4	4	59	3	162	0	76	0	0	0	18	32	0	0	0	2	9	5	142	2	20	14	0	1	21	0
ENSG00000279151.1	chr1;chr1;chr1	16701546;16702955;16705459	16701695;16703074;16705594	+;+;+	406	0	0	0	0	1	0	0	2	0	0	0	0	0	0	0	0	0	0	0	0	0	0	8	0	3	0	0	0	0	0	1	0	0	0	0	0	9	0	2	0	0	0	0	0
ENSG00000282740.1	chr1;chr1;chr1	16739938;16741937;16750494	16740523;16742073;16750589	-;-;-	819	0	0	0	2	0	1	2	85	0	0	4	0	0	0	4	23	22	0	0	0	40	0	174	1	0	0	22	2	20	0	7	0	0	9	3	0	53	0	3	0	0	3	0	0
ENSG00000058453.17	chr1;chr1;chr1;chr1;chr1;chr1;chr1;chr1;chr1;chr1;chr1;chr1;chr1;chr1;chr1;chr1;chr1;chr1;chr1;chr1;chr1;chr1;chr1;chr1;chr1;chr1;chr1;chr1;chr1;chr1;chr1;chr1;chr1;chr1;chr1;chr1;chr1;chr1;chr1;chr1;chr1;chr1;chr1;chr1;chr1;chr1;chr1;chr1;chr1;chr1;chr1;chr1;chr1;chr1;chr1;chr1;chr1;chr1;chr1;chr1;chr1;chr1;chr1;chr1;chr1;chr1;chr1;chr1;chr1;chr1;chr1;chr1;chr1;chr1;chr1;chr1;chr1;chr1;chr1;chr1…	16740273;16921931;16922663;16922755;16922767;16924325;16924325;16929846;16929846;16930124;16930124;16930135;16930286;16930286;16930286;16930286;16930286;16930429;16930429;16930429;16930429;16930429;16931291;16931291;16931291;16931291;16936637;16936637;16936637;16936637;16936791;16937641;16937641;16937641;16937641;16937641;16937641;16938400;16938400;16938400;16938400;16938909;16938909;16938909;169…	16740397;16922078;16922798;16922798;16922798;16924479;16924479;16930031;16930031;16930207;16930207;16930207;16930347;16930347;16930347;16930347;16930347;16930594;16930594;16930594;16930594;16930594;16931397;16931397;16931397;16931397;16936873;16936873;16936873;16936873;16936873;16937737;16937737;16937737;16937737;16937737;16937737;16938483;16938483;16938483;16938483;16939142;16939142;16939142;169…	+;+;+;+;+;+;+;+;+;+;+;+;+;+;+;+;+;+;+;+;+;+;+;+;+;+;+;+;+;+;+;+;+;+;+;+;+;+;+;+;+;+;+;+;+;+;+;+;+;+;+;+;+;+;+;+;+;+;+;+;+;+;+;+;+;+;+;+;+;+;+;+;+;+;+;+;+;+;+;+;+;+;+;+;+;+;+;+;+;+;+;+;+;+;+;+;+;+;+;+;+;+;+;+;+;+;+;+;+;+;+;+;+;+;+;+;+;+;+;+;+;+;+;+;+;+;+;+;+;+	8875	852	165	184	377	689	920	858	292	915	763	1209	740	297	923	648	767	460	331	392	407	863	752	904	333	471	956	833	683	675	636	562	662	754	722	465	447	825	622	648	1010	329	706	695	644
ENSG00000227684.2	chr1;chr1;chr1;chr1;chr1;chr1	16740280;16750233;16750514;16750514;16750673;16750797	16740397;16750421;16750594;16750968;16750732;16750964	+;+;+;+;+;+	762	5	3	0	0	0	6	0	32	0	0	6	0	0	9	2	3	2	0	0	0	26	8	95	0	0	4	1	3	6	0	5	2	20	2	10	12	63	4	1	1	1	17	2	2
ENSG00000207389.1	chr1	16740516	16740679	+	164	1904	459	646	991	7232	1397	4133	306	1317	1537	1404	818	1257	5063	6432	2429	395	4338	1948	2369	1675	1215	80	1177	3791	2891	909	8388	2377	2632	3670	852	2378	5055	391	1682	348	3973	3515	4839	641	967	1853	3576
ENSG00000186715.11	chr1;chr1;chr1;chr1;chr1;chr1;chr1;chr1;chr1;chr1;chr1;chr1;chr1;chr1;chr1;chr1;chr1;chr1;chr1;chr1;chr1;chr1;chr1;chr1;chr1;chr1;chr1;chr1;chr1;chr1;chr1;chr1;chr1;chr1;chr1;chr1;chr1;chr1;chr1;chr1;chr1;chr1;chr1;chr1;chr1;chr1;chr1;chr1;chr1;chr1;chr1;chr1;chr1	16754910;16755307;16757128;16757232;16757518;16757518;16757518;16757518;16757754;16757754;16757754;16757754;16757942;16757942;16757942;16757942;16758053;16758216;16758216;16758466;16758466;16758466;16758675;16758675;16758675;16758803;16758803;16758803;16758803;16758803;16759066;16759066;16759269;16759269;16759269;16759476;16759476;16759889;16759889;16760152;16760152;16760354;16760354;16760751;167…	16757393;16757393;16757393;16757393;16757657;16757657;16757657;16757657;16757860;16757860;16757860;16757860;16758088;16758711;16758088;16758088;16758586;16758293;16758293;16758586;16758586;16758586;16758711;16758711;16758711;16758823;16759035;16759168;16759035;16758872;16759168;16759168;16759399;16759291;16759399;16759686;16759686;16760007;16760007;16760272;16760272;16760490;16760490;16760873;167…	-;-;-;-;-;-;-;-;-;-;-;-;-;-;-;-;-;-;-;-;-;-;-;-;-;-;-;-;-;-;-;-;-;-;-;-;-;-;-;-;-;-;-;-;-;-;-;-;-;-;-;-;-	5298	3	26	0	10	4	47	10	294	88	27	33	21	19	62	11	158	148	2	3	2	449	47	659	22	45	26	96	14	81	7	53	18	4	43	34	45	403	24	24	26	10	46	16	16
ENSG00000223643.6	chr1;chr1;chr1;chr1;chr1;chr1;chr1	16851257;16851321;16851574;16852075;16852075;16852762;16852997	16851477;16851477;16851723;16852369;16852369;16852799;16853129	-;-;-;-;-;-;-	837	0	0	0	0	0	0	0	34	0	0	0	0	0	0	0	14	9	0	0	0	28	0	59	0	0	0	10	0	0	0	0	0	0	1	5	0	38	0	13	8	8	0	0	0
ENSG00000230239.1	chr1;chr1;chr1	16855407;16856712;16859049	16855523;16857240;16859284	+;+;+	882	0	0	0	0	0	0	0	38	1	0	0	0	0	0	0	60	4	0	0	0	91	0	149	0	20	0	0	0	15	0	2	0	0	1	0	0	77	1	0	0	1	0	0	1
ENSG00000263811.1	chr1	16858949	16859021	-	73	0	0	0	0	0	0	0	4	0	0	0	0	0	0	0	4	20	0	0	0	0	0	0	0	0	0	0	0	0	0	0	0	0	0	0	0	0	0	0	0	0	0	0	0
ENSG00000228549.4	chr1;chr1;chr1;chr1;chr1;chr1;chr1;chr1;chr1;chr1;chr1;chr1;chr1;chr1;chr1;chr1;chr1;chr1;chr1;chr1	16870945;16871761;16872157;16872226;16872226;16872258;16872281;16872284;16872559;16873039;16873114;16873693;16873723;16873723;16873723;16873723;16873723;16873784;16873784;16883330	16873107;16872153;16872591;16873429;16873143;16872342;16873143;16873507;16873143;16873143;16873429;16874041;16874092;16874092;16874044;16874024;16874079;16874081;16874048;16883659	+;+;+;+;+;+;+;+;+;+;+;+;+;+;+;+;+;+;+;+	3293	21	16	64	17	64	21	37	140	9	119	34	32	34	10	19	91	174	26	13	39	205	40	348	30	153	14	31	37	39	30	15	22	18	23	39	35	268	49	65	23	31	37	46	34
ENSG00000277234.1	chr1	16873708	16873851	+	144	0	0	0	0	0	0	0	0	0	0	0	0	0	0	0	0	0	0	0	0	0	0	0	0	0	0	0	0	0	0	0	0	0	0	0	0	0	0	0	0	0	0	0	0
ENSG00000238142.2	chr1;chr1;chr1;chr1;chr1;chr1;chr1;chr1;chr1;chr1;chr1;chr1;chr1	16887577;16887761;16888538;16888542;16888542;16888542;16888542;16889216;16889216;16889216;16889548;16889548;16889548	16888785;16888785;16888785;16889589;16888782;16888785;16888782;16889373;16889501;16889518;16889642;16889649;16889706	-;-;-;-;-;-;-;-;-;-;-;-;-	2130	2	17	1	7	0	31	3	86	5	44	4	21	11	8	0	69	46	13	4	1	84	24	127	8	8	0	7	0	49	8	0	5	2	24	10	12	105	41	4	3	10	10	8	1
ENSG00000235241.1	chr1	16889095	16889602	+	508	0	0	0	0	0	0	0	0	0	0	0	0	0	0	0	0	0	0	0	0	0	0	0	0	0	0	0	0	0	0	0	0	0	0	0	0	0	0	0	0	0	0	0	0
ENSG00000207005.1	chr1	16895980	16896143	+	164	9626	164	290	3757	18390	12900	1779	105	10937	11486	9043	171	388	7694	14136	15083	1208	18210	17397	656	4830	20017	83	6851	2388	1263	399	7754	1037	26230	20184	4861	5577	7392	2150	1259	1319	3984	26472	12119	5416	332	1324	8310
ENSG00000272426.1	chr1	16904339	16904776	-	438	0	0	0	0	32	0	2	6	2	0	0	0	0	20	5	1	27	6	2	0	16	0	50	0	6	1	13	1	2	0	1	8	0	2	8	4	28	3	1	28	7	23	1	0
ENSG00000117122.14	chr1;chr1;chr1;chr1;chr1;chr1;chr1;chr1;chr1;chr1;chr1;chr1;chr1;chr1;chr1;chr1;chr1;chr1;chr1;chr1;chr1;chr1;chr1;chr1;chr1;chr1;chr1;chr1;chr1;chr1;chr1;chr1;chr1;chr1;chr1;chr1;chr1;chr1	16974502;16974502;16974502;16975269;16975269;16975269;16975643;16975643;16975643;16975662;16976171;16976249;16976501;16976501;16976501;16976501;16976708;16976708;16976708;16976708;16976708;16976708;16976897;16976897;16976897;16977109;16977109;16977109;16977109;16977109;16978237;16978237;16978237;16978237;16978237;16980587;16980587;16980587	16975023;16975023;16975023;16975342;16975342;16975342;16975730;16975730;16975730;16975730;16976545;16976545;16976545;16976545;16976545;16976545;16976923;16976794;16976923;16978314;16976794;16976794;16976923;16976923;16976923;16977198;16977198;16977198;16977198;16977195;16978314;16978314;16978314;16978314;16978276;16980621;16980632;16980620	-;-;-;-;-;-;-;-;-;-;-;-;-;-;-;-;-;-;-;-;-;-;-;-;-;-;-;-;-;-;-;-;-;-;-;-;-;-	2712	256	193	63	92	37	261	450	100	58	261	55	309	64	89	167	287	109	59	118	231	317	230	194	61	241	426	415	169	79	148	200	246	509	152	122	54	168	284	149	148	126	98	124	89
ENSG00000286898.1	chr1;chr1	16976302;16977669	16976562;16977792	+;+	385	1	0	0	0	0	0	0	0	0	1	0	0	0	0	0	0	0	6	0	0	2	0	3	0	0	0	3	0	0	0	0	0	0	0	0	0	0	0	0	0	0	0	1	0
ENSG00000226526.1	chr1;chr1	16978926;17004643	16979112;17005091	+;+	636	0	2	0	14	0	14	1	3	0	25	6	0	0	0	0	6	17	0	2	0	17	12	15	1	3	0	0	6	2	0	0	21	0	0	9	0	20	0	0	0	0	1	0	1
ENSG00000159363.19	chr1;chr1;chr1;chr1;chr1;chr1;chr1;chr1;chr1;chr1;chr1;chr1;chr1;chr1;chr1;chr1;chr1;chr1;chr1;chr1;chr1;chr1;chr1;chr1;chr1;chr1;chr1;chr1;chr1;chr1;chr1;chr1;chr1;chr1;chr1;chr1;chr1;chr1;chr1;chr1;chr1;chr1;chr1;chr1;chr1;chr1;chr1;chr1;chr1;chr1;chr1;chr1;chr1;chr1;chr1;chr1;chr1;chr1;chr1;chr1;chr1;chr1;chr1;chr1;chr1;chr1;chr1;chr1;chr1;chr1;chr1;chr1;chr1;chr1;chr1;chr1;chr1;chr1;chr1;chr1…	16985958;16985958;16985958;16985959;16985981;16986463;16986463;16986463;16986805;16986805;16986805;16986805;16987046;16987046;16987046;16987046;16987046;16988138;16988138;16988138;16988138;16988138;16988322;16988322;16988322;16988322;16988322;16989691;16989691;16989691;16989691;16989691;16989887;16989887;16989887;16989887;16990127;16990127;16990127;16990127;16990175;16991734;16991734;16991734;169…	16986358;16986358;16986358;16986358;16986358;16986956;16986632;16986632;16986956;16986956;16986956;16986956;16987269;16987269;16987269;16987269;16987269;16988234;16988234;16988234;16988234;16988234;16988474;16988474;16988474;16988474;16988474;16989770;16989770;16989770;16989770;16989770;16990003;16990003;16990003;16990003;16990287;16990287;16990287;16990287;16990287;16991858;16991858;16991858;169…	-;-;-;-;-;-;-;-;-;-;-;-;-;-;-;-;-;-;-;-;-;-;-;-;-;-;-;-;-;-;-;-;-;-;-;-;-;-;-;-;-;-;-;-;-;-;-;-;-;-;-;-;-;-;-;-;-;-;-;-;-;-;-;-;-;-;-;-;-;-;-;-;-;-;-;-;-;-;-;-;-;-;-;-;-;-;-;-;-;-;-;-;-;-;-;-;-;-;-;-;-;-;-;-;-;-;-;-;-;-;-;-;-;-;-;-;-;-;-;-;-;-;-;-;-;-;-;-;-;-;-;-;-;-;-;-;-;-;-;-;-;-;-;-;-;-;-;-;-;-;-;-;-;-;-;-;-;-;-	5253	242	163	83	122	348	492	371	264	165	141	661	344	71	365	205	175	195	147	193	210	331	321	329	159	157	235	245	229	227	246	372	315	357	248	127	217	288	210	148	427	216	159	227	182
ENSG00000288636.1	chr1;chr1;chr1;chr1	17005068;17005374;17005684;17011729	17005072;17005556;17005778;17011757	-;-;-;-	312	0	0	0	0	0	0	0	0	0	0	0	0	0	0	0	0	0	0	0	0	0	0	0	0	0	0	0	0	0	0	0	0	0	0	0	0	0	0	0	0	0	0	0	0
ENSG00000117118.10	chr1;chr1;chr1;chr1;chr1;chr1;chr1;chr1;chr1;chr1;chr1;chr1;chr1;chr1;chr1;chr1;chr1;chr1;chr1;chr1;chr1;chr1;chr1;chr1;chr1;chr1;chr1;chr1;chr1;chr1;chr1;chr1;chr1;chr1;chr1;chr1;chr1;chr1	17018722;17018752;17018752;17022608;17022608;17022608;17022608;17023094;17023973;17023973;17023973;17027656;17027749;17027749;17027749;17027749;17028600;17028600;17028600;17028600;17028654;17032530;17033060;17033060;17033060;17033060;17033060;17044761;17044761;17044761;17044761;17044761;17044761;17045141;17052255;17053948;17053948;17053948	17018958;17018958;17018958;17022730;17022730;17023036;17022730;17023160;17024074;17024074;17024074;17027865;17027865;17027865;17027865;17027865;17028736;17028736;17028736;17028736;17028736;17033145;17033145;17033145;17033145;17033145;17033145;17044888;17044888;17044877;17044888;17044888;17044888;17045219;17052488;17054031;17054007;17054032	-;-;-;-;-;-;-;-;-;-;-;-;-;-;-;-;-;-;-;-;-;-;-;-;-;-;-;-;-;-;-;-;-;-;-;-;-;-	2324	155	136	36	158	413	368	268	133	295	186	397	225	7	369	191	96	53	234	166	150	163	221	96	47	452	177	148	135	156	205	255	172	394	232	88	176	133	86	154	319	177	147	148	188
ENSG00000117115.13	chr1;chr1;chr1;chr1;chr1;chr1;chr1;chr1;chr1;chr1;chr1;chr1;chr1;chr1;chr1;chr1;chr1;chr1;chr1;chr1;chr1;chr1;chr1;chr1;chr1;chr1;chr1;chr1;chr1;chr1;chr1;chr1;chr1;chr1;chr1;chr1;chr1;chr1	17066761;17067600;17067786;17070088;17070088;17070088;17071406;17071406;17071406;17074856;17074856;17074856;17075679;17079031;17079264;17079264;17082545;17082545;17082545;17083236;17083726;17083726;17084599;17084599;17086521;17086521;17092408;17092408;17093567;17093567;17095909;17095909;17102987;17102987;17104878;17104878;17119280;17119280	17069277;17069277;17069277;17070216;17070216;17070216;17071491;17071491;17071491;17075823;17075351;17074949;17075823;17079415;17079415;17079415;17082652;17083138;17082652;17083426;17083837;17083837;17084702;17084702;17086699;17086699;17092533;17092533;17093684;17093684;17095970;17095970;17103059;17103059;17105061;17105061;17119435;17119451	-;-;-;-;-;-;-;-;-;-;-;-;-;-;-;-;-;-;-;-;-;-;-;-;-;-;-;-;-;-;-;-;-;-;-;-;-;-	6000	207	1423	43	160	180	345	210	303	70	96	27	1883	105	116	1497	334	160	2229	1276	889	1222	128	330	83	5910	284	284	185	80	292	111	181	903	173	165	2760	294	297	1039	164	102	508	84	470
ENSG00000204362.6	chr1;chr1;chr1;chr1;chr1;chr1;chr1	17189783;17189789;17192965;17192965;17193291;17195443;17196300	17189930;17189930;17193165;17193165;17197617;17195601;17196387	+;+;+;+;+;+;+	4676	0	0	2	0	0	11	0	123	0	85	0	0	0	0	0	20	107	10	0	0	181	0	184	8	0	0	23	0	23	0	0	57	6	0	4	0	93	0	1	5	5	0	0	7
ENSG00000282843.1	chr1;chr1;chr1;chr1;chr1	17193232;17195020;17196529;17197570;17201456	17193797;17195133;17196754;17197613;17201733	-;-;-;-;-	1228	0	0	0	0	0	0	0	6	0	0	0	0	0	0	0	2	2	0	0	0	9	0	3	0	0	0	0	0	1	0	0	13	0	0	0	0	3	0	0	0	0	0	0	0
ENSG00000142623.11	chr1;chr1;chr1;chr1;chr1;chr1;chr1;chr1;chr1;chr1;chr1;chr1;chr1;chr1;chr1;chr1;chr1;chr1;chr1;chr1;chr1;chr1;chr1;chr1;chr1	17205128;17222290;17223487;17223621;17224367;17224367;17225811;17225811;17226033;17226033;17228625;17228948;17230085;17230572;17232819;17237314;17238616;17239632;17239632;17239704;17240635;17240635;17244010;17244010;17244010	17205309;17222470;17223693;17223693;17224428;17224428;17225928;17225928;17226158;17226158;17228797;17229051;17230208;17230679;17232970;17237458;17238709;17240760;17239783;17239783;17240760;17240760;17245968;17246004;17246007	+;+;+;+;+;+;+;+;+;+;+;+;+;+;+;+;+;+;+;+;+;+;+;+;+	4903	6	14	0	0	0	6	6	195	0	0	4	11	18	0	0	152	69	21	0	0	221	0	282	1	0	4	55	0	46	0	0	0	2	6	18	0	202	0	1	0	49	5	0	3
ENSG00000142619.4	chr1;chr1;chr1;chr1;chr1;chr1;chr1;chr1;chr1;chr1;chr1;chr1;chr1;chr1;chr1;chr1	17249098;17259578;17262133;17265659;17266719;17267837;17270233;17270879;17271067;17273340;17274635;17276519;17276774;17280350;17280671;17282846	17249229;17259758;17262205;17265720;17266836;17267962;17270411;17270982;17271178;17273447;17274786;17276663;17276876;17280429;17280796;17284233	+;+;+;+;+;+;+;+;+;+;+;+;+;+;+;+	3189	0	10	34	2	0	6	0	112	0	1	0	10	0	0	23	36	115	75	45	0	177	1	149	7	38	0	13	0	27	30	0	0	0	0	3	323	144	1	1	0	0	0	1	0
ENSG00000266634.1	chr1	17277889	17277975	+	87	0	0	0	0	0	0	0	0	0	0	0	0	0	0	0	0	0	0	0	0	0	0	0	0	0	0	0	0	0	0	0	0	0	0	0	1	0	0	0	0	0	0	0	0
ENSG00000159339.13	chr1;chr1;chr1;chr1;chr1;chr1;chr1;chr1;chr1;chr1;chr1;chr1;chr1;chr1;chr1;chr1;chr1;chr1;chr1;chr1;chr1;chr1;chr1;chr1;chr1;chr1;chr1;chr1;chr1;chr1;chr1	17308195;17308197;17330969;17330969;17333943;17333943;17334324;17336159;17338038;17339688;17341943;17342299;17346028;17346034;17347927;17347941;17347941;17348730;17354533;17354533;17354533;17355983;17355983;17355983;17356357;17356357;17356357;17358838;17358838;17359280;17363522	17308314;17308314;17331149;17331149;17334009;17334009;17334796;17336226;17338155;17339813;17342121;17342402;17346139;17346139;17348048;17348207;17348048;17348785;17354687;17354687;17354687;17356127;17356127;17356127;17356459;17356447;17356459;17358849;17358908;17359408;17364004	+;+;+;+;+;+;+;+;+;+;+;+;+;+;+;+;+;+;+;+;+;+;+;+;+;+;+;+;+;+;+	2971	0	0	2	2	0	3	0	133	0	0	0	0	0	0	2	89	93	0	0	0	214	0	244	2	0	0	34	0	44	0	0	0	1	3	11	0	151	2	2	0	3	0	0	0
ENSG00000276747.1	chr1;chr1;chr1;chr1;chr1;chr1;chr1;chr1;chr1;chr1;chr1;chr1;chr1;chr1;chr1;chr1	17372196;17373056;17375427;17379920;17381047;17381967;17388381;17388777;17392114;17393975;17394300;17394951;17395540;17397071;17398686;17401205	17372361;17373233;17375499;17379987;17381164;17382092;17388559;17388880;17392225;17394082;17394454;17395107;17395663;17397141;17398847;17401699	+;+;+;+;+;+;+;+;+;+;+;+;+;+;+;+	2396	0	0	0	0	0	3	7	112	0	3	0	0	0	10	0	52	73	0	0	0	156	0	193	13	504	0	15	0	12	2	5	0	0	8	4	0	124	1	1	4	0	0	0	3
ENSG00000227751.1	chr1;chr1	17406760;17407317	17407004;17407382	+;+	311	0	0	0	0	0	0	0	0	0	0	0	0	0	0	0	0	0	0	0	0	0	0	0	0	0	0	0	0	0	0	0	0	0	0	0	0	0	0	0	0	0	0	0	0
ENSG00000179051.14	chr1;chr1;chr1;chr1;chr1;chr1;chr1;chr1;chr1;chr1;chr1;chr1;chr1;chr1;chr1;chr1;chr1;chr1;chr1;chr1;chr1;chr1;chr1;chr1;chr1;chr1;chr1	17406760;17407839;17408676;17408980;17409974;17409974;17412122;17412122;17413073;17413073;17413537;17413537;17416480;17416480;17420714;17420714;17422203;17422203;17422705;17422705;17425541;17425541;17429106;17429106;17438230;17438230;17439545	17409194;17408554;17409194;17409046;17410051;17410051;17412194;17412194;17413178;17413178;17413717;17413717;17416646;17416646;17420828;17420828;17422291;17422291;17422836;17422836;17425684;17425684;17429199;17429199;17438561;17438522;17439677	-;-;-;-;-;-;-;-;-;-;-;-;-;-;-;-;-;-;-;-;-;-;-;-;-;-;-	4079	852	1140	628	513	829	3013	1264	409	852	385	1278	1866	197	745	1193	465	358	1217	1093	1411	713	1254	302	385	4430	1179	836	714	391	624	1545	662	1394	1068	416	1162	364	512	601	1313	730	1039	578	728
ENSG00000074964.17	chr1;chr1;chr1;chr1;chr1;chr1;chr1;chr1;chr1;chr1;chr1;chr1;chr1;chr1;chr1;chr1;chr1;chr1;chr1;chr1;chr1;chr1;chr1;chr1;chr1;chr1;chr1;chr1;chr1;chr1;chr1;chr1;chr1;chr1;chr1;chr1;chr1;chr1;chr1;chr1;chr1;chr1;chr1;chr1;chr1;chr1;chr1;chr1;chr1;chr1;chr1;chr1;chr1;chr1;chr1;chr1;chr1;chr1;chr1;chr1;chr1;chr1;chr1;chr1;chr1;chr1;chr1;chr1;chr1;chr1;chr1;chr1;chr1;chr1;chr1;chr1;chr1;chr1;chr1;chr1…	17539698;17580553;17580553;17587460;17587460;17588446;17588446;17602127;17602127;17602171;17603508;17603508;17603508;17604476;17607802;17607802;17613058;17615088;17616094;17616094;17618316;17619339;17619339;17619339;17619339;17621864;17621864;17621864;17621864;17622996;17622996;17622996;17622996;17624387;17624387;17624387;17624387;17625956;17625956;17625956;17625956;17626007;17627330;17627330;176…	17539950;17580632;17580632;17587645;17587645;17588479;17588479;17602218;17602218;17602218;17603591;17603591;17603591;17604882;17607977;17607977;17613174;17616202;17616202;17616202;17618522;17619445;17619445;17619445;17619445;17621941;17621941;17621941;17621941;17623175;17623175;17623175;17623175;17624503;17624503;17624503;17624503;17626048;17626048;17626048;17626048;17626048;17627503;17627503;176…	+;+;+;+;+;+;+;+;+;+;+;+;+;+;+;+;+;+;+;+;+;+;+;+;+;+;+;+;+;+;+;+;+;+;+;+;+;+;+;+;+;+;+;+;+;+;+;+;+;+;+;+;+;+;+;+;+;+;+;+;+;+;+;+;+;+;+;+;+;+;+;+;+;+;+;+;+;+;+;+;+;+;+;+;+;+;+;+;+;+;+;+;+;+;+;+;+;+;+;+;+;+;+;+;+;+;+;+;+;+;+;+;+;+;+;+;+;+;+;+;+;+;+;+	7954	617	272	192	383	331	950	728	606	611	722	808	720	440	505	802	756	425	569	220	492	706	967	694	238	1170	767	847	803	444	645	845	904	814	804	421	506	480	759	714	644	717	471	1233	347
ENSG00000236648.2	chr1;chr1;chr1;chr1;chr1;chr1;chr1;chr1;chr1;chr1;chr1;chr1;chr1;chr1	17717625;17717631;17717677;17717687;17718560;17718560;17718560;17718560;17721680;17721680;17721680;17721680;17722043;17749677	17717744;17717744;17717744;17717744;17718720;17718791;17718720;17718791;17721768;17722347;17721768;17722352;17722353;17749978	+;+;+;+;+;+;+;+;+;+;+;+;+;+	1328	0	0	0	0	0	0	0	52	0	19	0	0	0	0	0	7	8	0	0	0	56	0	61	3	0	0	5	0	26	0	0	0	0	0	1	5	51	9	0	0	0	0	0	0
ENSG00000117148.8	chr1;chr1;chr1;chr1;chr1	17755333;17822982;17822985;17825767;17825767	17755504;17823356;17823356;17827063;17827061	+;+;+;+;+	1844	0	0	0	0	10	0	0	45	0	0	113	10	2	0	0	37	17	0	0	0	45	0	83	2	3	9	15	0	10	0	0	0	0	0	12	8	64	1	0	0	0	0	1	0
ENSG00000284653.1	chr1;chr1;chr1;chr1	18015712;18035789;18038305;18044885	18016371;18035900;18038817;18045612	+;+;+;+	2013	0	0	0	0	0	0	0	82	0	0	0	0	7	0	0	18	47	0	0	0	47	0	150	1	0	0	15	0	21	0	0	0	0	0	13	0	48	0	0	0	0	0	0	5
ENSG00000261781.1	chr1;chr1;chr1	18065657;18068192;18072220	18065847;18068278;18074412	+;+;+	2471	0	0	0	0	0	0	0	85	0	0	0	0	0	0	1	34	48	0	0	0	110	0	128	9	2	0	17	0	17	0	0	0	0	0	20	0	94	0	1	0	0	0	0	3
ENSG00000117154.12	chr1;chr1;chr1;chr1;chr1;chr1;chr1;chr1;chr1;chr1;chr1;chr1;chr1;chr1;chr1;chr1;chr1;chr1;chr1;chr1;chr1;chr1;chr1;chr1	18107798;18227898;18278845;18291866;18291866;18334892;18334892;18361367;18362115;18362115;18365223;18365223;18365223;18375957;18376310;18376310;18376310;18376800;18376800;18376800;18377393;18377393;18378256;18378256	18108198;18228010;18278884;18291987;18291987;18335010;18335010;18362230;18362230;18362230;18365697;18365697;18365697;18376395;18376395;18376367;18376395;18376920;18376992;18376992;18377431;18377431;18378483;18378483	+;+;+;+;+;+;+;+;+;+;+;+;+;+;+;+;+;+;+;+;+;+;+;+	3033	102	26	100	126	70	95	631	384	387	56	278	120	148	96	1038	237	134	231	778	50	235	142	365	45	0	527	170	84	48	20	987	3	88	47	229	24	333	19	291	89	191	279	446	289
ENSG00000280222.1	chr1	18109389	18115861	+	6473	214	72	209	100	33	115	569	645	486	19	186	121	84	70	1898	530	334	523	432	13	249	85	240	39	44	435	213	99	149	34	754	46	119	72	276	40	597	56	300	131	265	167	479	294
ENSG00000230035.2	chr1;chr1;chr1;chr1	18166929;18167747;18176153;18179052	18167024;18167763;18176174;18179346	-;-;-;-	430	7	5	8	5	0	0	45	53	19	75	25	5	6	0	110	44	20	32	87	5	33	6	29	5	0	56	2	30	4	9	53	2	7	10	30	4	52	0	8	4	8	23	78	26
ENSG00000225387.1	chr1;chr1	18385829;18388416	18386220;18388514	+;+	491	0	0	0	0	0	0	0	22	3	0	0	0	1	0	0	1	22	0	0	0	43	0	29	0	0	0	8	0	0	0	0	0	0	13	0	0	18	0	0	0	0	0	0	0
ENSG00000179023.8	chr1	18480982	18486126	+	5145	2	1	31	223	6	90	389	189	25	29	20	714	154	3	1987	392	139	49	345	66	316	109	219	13	39	53	56	346	26	39	28	30	103	250	60	52	103	9	117	736	0	1366	236	51
ENSG00000235282.3	chr1	18513118	18513383	+	266	0	0	0	0	0	0	0	10	0	0	0	0	0	0	0	1	5	0	1	0	33	0	20	0	0	0	0	0	1	1	0	0	0	0	0	0	17	0	0	0	0	1	0	0
ENSG00000225478.2	chr1	18595414	18595636	+	223	0	0	0	0	0	0	0	1	0	0	0	0	4	0	0	0	0	0	0	0	2	0	3	0	0	0	0	0	0	0	0	0	0	0	0	0	0	0	0	2	14	3	0	0
ENSG00000009709.12	chr1;chr1;chr1;chr1;chr1;chr1;chr1;chr1;chr1;chr1;chr1;chr1;chr1;chr1;chr1;chr1;chr1;chr1;chr1;chr1;chr1;chr1;chr1;chr1;chr1	18630846;18631006;18631524;18634303;18634303;18634303;18635111;18635111;18635111;18636237;18636237;18636243;18691754;18691754;18691754;18700653;18700653;18700653;18703094;18703094;18703094;18735632;18735632;18735632;18744814	18631688;18631688;18631688;18634538;18634538;18634538;18635240;18635240;18635240;18636371;18636371;18636371;18691953;18691953;18691953;18700818;18700818;18700818;18703296;18703296;18703296;18736102;18736138;18735878;18748866	+;+;+;+;+;+;+;+;+;+;+;+;+;+;+;+;+;+;+;+;+;+;+;+;+	6473	12	57	142	5	0	183	1	230	0	16	3	149	0	0	11	79	124	0	0	14	329	0	384	11	0	0	21	0	66	0	1	0	186	1	35	2	230	29	20	433	2	28	0	5
ENSG00000179002.5	chr1;chr1;chr1;chr1;chr1;chr1	18839599;18841729;18849341;18854213;18857331;18859479	18840527;18841852;18849550;18854986;18857631;18859682	-;-;-;-;-;-	2542	0	0	0	0	0	1	0	90	0	6	0	14	0	0	0	29	79	1	0	0	154	0	209	1	2	0	15	0	13	0	0	0	0	0	19	0	125	8	1	0	0	0	0	0
ENSG00000159423.17	chr1;chr1;chr1;chr1;chr1;chr1;chr1;chr1;chr1;chr1;chr1;chr1;chr1;chr1;chr1;chr1;chr1;chr1;chr1;chr1;chr1;chr1;chr1;chr1;chr1;chr1;chr1;chr1;chr1;chr1;chr1;chr1;chr1;chr1;chr1;chr1;chr1;chr1;chr1;chr1;chr1;chr1;chr1;chr1;chr1;chr1;chr1;chr1;chr1;chr1;chr1;chr1;chr1;chr1;chr1;chr1;chr1;chr1;chr1;chr1;chr1;chr1;chr1;chr1;chr1;chr1;chr1;chr1;chr1;chr1	18871430;18871430;18871432;18872733;18872804;18874463;18874463;18874463;18874463;18875382;18875382;18875382;18875382;18876315;18876315;18876315;18877208;18877208;18877208;18877208;18877416;18877416;18877416;18877416;18879300;18879300;18879300;18879300;18881700;18881700;18881700;18881700;18882560;18883111;18883124;18883124;18883124;18883124;18883124;18883279;18883279;18883279;18883279;18883279;188…	18872957;18871790;18872957;18872957;18872957;18874581;18874581;18874581;18874581;18875503;18875503;18875503;18875503;18876467;18876467;18876467;18877255;18877255;18877255;18877255;18877612;18877612;18877612;18877612;18879373;18879373;18879373;18879373;18881887;18881887;18881887;18881887;18882672;18883198;18883198;18883198;18883198;18883198;18883198;18883428;18883428;18883428;18883428;18883428;188…	-;-;-;-;-;-;-;-;-;-;-;-;-;-;-;-;-;-;-;-;-;-;-;-;-;-;-;-;-;-;-;-;-;-;-;-;-;-;-;-;-;-;-;-;-;-;-;-;-;-;-;-;-;-;-;-;-;-;-;-;-;-;-;-;-;-;-;-;-;-	3632	73	15	48	59	189	330	231	164	129	29	305	175	74	159	122	109	186	164	1304	94	179	97	250	81	67	104	187	189	110	95	297	139	185	72	124	209	142	65	202	159	165	106	127	67
ENSG00000265606.1	chr1	18883202	18883275	-	74	0	0	0	0	0	0	0	0	0	0	0	0	0	0	0	0	0	0	0	0	0	0	0	0	0	0	0	0	0	0	0	0	0	0	0	0	0	0	0	0	0	0	0	0
ENSG00000221662.1	chr1	18897071	18897148	-	78	0	8	0	0	0	9	3	0	0	0	0	0	0	0	0	0	0	1	0	0	6	0	0	0	0	0	0	0	0	0	0	0	0	0	0	10	0	0	0	0	0	0	0	0
ENSG00000169991.11	chr1;chr1;chr1;chr1;chr1;chr1;chr1;chr1;chr1;chr1;chr1;chr1;chr1;chr1;chr1;chr1;chr1;chr1;chr1;chr1	18904280;18908291;18908340;18910342;18910342;18910342;18911384;18911384;18911963;18911963;18911963;18916903;18916903;18918362;18919678;18919678;18921061;18921061;18955668;18955668	18908666;18908666;18908666;18910472;18910472;18910472;18911476;18911476;18912083;18912083;18911992;18917042;18917042;18918502;18919773;18919773;18921121;18921121;18955698;18956676	-;-;-;-;-;-;-;-;-;-;-;-;-;-;-;-;-;-;-;-	6179	247	264	136	181	1010	445	634	272	229	253	907	496	298	606	394	234	243	493	210	503	651	288	408	166	412	256	688	429	537	486	176	559	437	503	245	186	356	216	180	144	289	289	970	250
ENSG00000272084.1	chr1	19072110	19075511	-	3402	18	6	1	18	18	20	17	71	34	6	21	23	10	57	24	46	54	44	6	22	118	19	99	1	0	15	59	20	68	10	0	23	22	74	48	15	54	21	14	1	7	6	0	23
ENSG00000127481.15	chr1;chr1;chr1;chr1;chr1;chr1;chr1;chr1;chr1;chr1;chr1;chr1;chr1;chr1;chr1;chr1;chr1;chr1;chr1;chr1;chr1;chr1;chr1;chr1;chr1;chr1;chr1;chr1;chr1;chr1;chr1;chr1;chr1;chr1;chr1;chr1;chr1;chr1;chr1;chr1;chr1;chr1;chr1;chr1;chr1;chr1;chr1;chr1;chr1;chr1;chr1;chr1;chr1;chr1;chr1;chr1;chr1;chr1;chr1;chr1;chr1;chr1;chr1;chr1;chr1;chr1;chr1;chr1;chr1;chr1;chr1;chr1;chr1;chr1;chr1;chr1;chr1;chr1;chr1;chr1…	19074510;19074510;19074514;19074518;19074567;19076740;19076740;19076740;19076740;19076740;19077785;19077976;19077976;19077976;19077976;19081349;19081349;19081349;19084504;19084504;19086145;19086145;19086679;19086679;19087816;19087816;19088759;19088759;19092733;19092819;19092819;19093313;19093313;19093313;19093361;19093949;19093949;19093949;19094095;19094906;19094906;19094906;19094906;19095545;190…	19074896;19074896;19074896;19074896;19074896;19076902;19076902;19076902;19076902;19076902;19077827;19078066;19081306;19078066;19078066;19081573;19081573;19082240;19084698;19084698;19086270;19086270;19086821;19086821;19087929;19087929;19088977;19088977;19092918;19092918;19092918;19093440;19093486;19093486;19093486;19094139;19094139;19094139;19094139;19095025;19095025;19095025;19095025;19095922;190…	-;-;-;-;-;-;-;-;-;-;-;-;-;-;-;-;-;-;-;-;-;-;-;-;-;-;-;-;-;-;-;-;-;-;-;-;-;-;-;-;-;-;-;-;-;-;-;-;-;-;-;-;-;-;-;-;-;-;-;-;-;-;-;-;-;-;-;-;-;-;-;-;-;-;-;-;-;-;-;-;-;-;-;-;-;-;-;-;-;-;-;-;-;-;-;-;-;-;-;-;-;-;-;-;-;-;-;-;-;-;-;-;-;-;-;-;-;-;-;-;-;-;-;-;-;-;-;-;-;-;-;-;-;-;-;-;-;-;-;-;-;-;-;-;-;-;-;-;-;-;-;-;-;-;-;-;-;-;-;-;-;-;-;-;-;-;-;-;-;-;-;-;-;-;-;-;-;-;-;-;-;-;-;-;-;-;-;-;-;-;-;-;-;-;-;-;-;-;-;-…	24661	4589	1962	2185	3551	5519	9141	6089	2583	4696	3675	6527	5222	1165	7458	4780	3008	1985	4593	4863	4597	4106	4614	2195	1845	5616	4249	4636	5216	5220	4452	6212	5167	6523	5652	2730	4044	2714	3403	3807	4902	4384	4118	6020	4492
ENSG00000230424.1	chr1;chr1	19210501;19240257	19210559;19240704	+;+	507	8	1	9	1	13	38	6	8	10	7	12	6	0	21	15	2	1	1	4	17	22	1	35	18	1	27	1	4	38	12	23	5	2	47	9	4	5	9	0	1	18	5	1	10
ENSG00000127463.15	chr1;chr1;chr1;chr1;chr1;chr1;chr1;chr1;chr1;chr1;chr1;chr1;chr1;chr1;chr1;chr1;chr1;chr1;chr1;chr1;chr1;chr1;chr1;chr1;chr1;chr1;chr1;chr1;chr1;chr1;chr1;chr1;chr1;chr1;chr1;chr1;chr1;chr1;chr1;chr1;chr1;chr1;chr1;chr1;chr1;chr1;chr1;chr1;chr1;chr1;chr1;chr1;chr1;chr1;chr1;chr1;chr1;chr1;chr1;chr1;chr1;chr1;chr1;chr1;chr1;chr1;chr1;chr1;chr1;chr1;chr1;chr1;chr1;chr1;chr1;chr1;chr1;chr1;chr1;chr1…	19215660;19216874;19216874;19218148;19218945;19219370;19219382;19219569;19219569;19219569;19219569;19219569;19219569;19219569;19219569;19219615;19220764;19220764;19220764;19220764;19220764;19220764;19220764;19220764;19222624;19222624;19222624;19222624;19222624;19222624;19222624;19223396;19223396;19223396;19223396;19223396;19227313;19227313;19227313;19227313;19229355;19230844;19230844;19230844;192…	19219482;19219482;19219482;19219482;19219482;19219482;19219482;19219698;19219669;19219669;19221205;19219698;19219698;19219698;19219698;19219669;19220848;19220848;19220848;19220810;19220848;19220848;19221916;19220848;19223007;19222834;19222834;19222761;19222834;19222834;19222834;19223569;19223506;19223569;19223569;19223569;19227450;19227450;19227450;19227450;19229395;19230963;19230963;19230963;192…	-;-;-;-;-;-;-;-;-;-;-;-;-;-;-;-;-;-;-;-;-;-;-;-;-;-;-;-;-;-;-;-;-;-;-;-;-;-;-;-;-;-;-;-;-;-;-;-;-;-;-;-;-;-;-;-;-;-;-;-;-;-;-;-;-;-;-;-;-;-;-;-;-;-;-;-;-;-;-;-;-;-;-;-;-;-;-;-;-;-;-;-;-;-;-;-;-;-;-;-;-;-;-;-;-	9602	584	446	274	491	1582	1599	914	681	810	582	1043	578	163	1247	1097	634	448	931	983	727	673	608	492	220	1721	542	593	629	688	600	845	673	838	886	552	644	442	577	554	1304	602	600	609	717
ENSG00000053372.5	chr1;chr1;chr1;chr1;chr1;chr1;chr1;chr1;chr1;chr1;chr1;chr1;chr1;chr1	19251805;19251835;19254782;19254782;19255948;19255948;19257064;19257454;19257712;19257833;19258477;19258477;19258681;19258681	19251863;19252248;19254840;19254840;19256052;19256051;19257145;19257521;19257984;19257984;19258553;19258553;19260128;19258739	+;+;+;+;+;+;+;+;+;+;+;+;+;+	2556	124	111	110	59	558	350	252	129	151	131	454	256	73	473	250	260	98	162	221	144	154	232	187	97	473	131	180	169	462	187	192	176	214	146	79	145	115	107	119	661	98	200	179	208
ENSG00000286064.1	chr1;chr1	19260521;19262182	19260733;19262307	-;-	339	7	1	11	6	0	3	1	7	0	8	24	1	0	38	45	0	4	0	1	0	9	19	7	1	0	0	2	7	18	0	14	3	0	0	0	4	6	0	0	41	0	14	1	9
ENSG00000211454.15	chr1;chr1;chr1;chr1;chr1;chr1;chr1;chr1;chr1;chr1;chr1;chr1;chr1;chr1;chr1;chr1;chr1;chr1;chr1;chr1;chr1;chr1	19265982;19267103;19267130;19268572;19268572;19268572;19269272;19269272;19269583;19269583;19270451;19270451;19270451;19270533;19270748;19270748;19270748;19270748;19270835;19273861;19273861;19273861	19267461;19267461;19267461;19268701;19268701;19268701;19269371;19269371;19269679;19269679;19270555;19270555;19270555;19270555;19271269;19270831;19270935;19270935;19270935;19274151;19273941;19274194	-;-;-;-;-;-;-;-;-;-;-;-;-;-;-;-;-;-;-;-;-;-	2768	29	0	84	17	237	13	40	73	52	35	299	59	5	425	63	127	34	19	156	21	104	22	171	8	15	27	60	44	498	38	58	37	14	36	22	19	129	21	4	292	29	36	44	132
ENSG00000162482.5	chr1;chr1;chr1;chr1;chr1;chr1;chr1	19282573;19283996;19284686;19285018;19285888;19286185;19288496	19282892;19284125;19284785;19285114;19285992;19286372;19288770	-;-;-;-;-;-;-	1215	19	6	80	5	1678	16	16	36	3	7	910	56	6	1179	92	168	26	53	514	5	64	16	81	24	10	10	20	31	450	6	23	7	10	14	51	99	69	34	22	472	16	30	46	926
ENSG00000270728.1	chr1;chr1	19297080;19297489	19297189;19297903	+;+	525	6	35	6	29	26	12	16	42	1	0	41	0	0	66	35	22	11	0	30	5	31	34	34	0	70	3	5	1	29	67	1	26	20	16	0	0	22	0	3	40	4	15	27	28
ENSG00000053371.12	chr1;chr1;chr1;chr1;chr1;chr1;chr1;chr1;chr1;chr1;chr1;chr1;chr1;chr1;chr1;chr1;chr1;chr1;chr1;chr1;chr1;chr1;chr1;chr1;chr1;chr1	19303965;19303999;19304166;19304285;19306018;19306018;19306018;19306018;19307002;19307002;19307002;19307314;19307314;19307739;19308158;19308158;19308158;19308455;19308455;19308455;19308455;19308455;19311827;19311827;19311827;19311827	19304386;19304386;19304386;19304386;19306147;19306147;19306147;19306147;19307101;19307101;19307101;19307410;19307410;19308262;19308262;19308262;19308262;19308642;19308505;19308642;19308642;19308642;19312103;19311907;19312094;19312146	-;-;-;-;-;-;-;-;-;-;-;-;-;-;-;-;-;-;-;-;-;-;-;-;-;-	1781	131	93	84	50	836	366	223	138	212	171	720	123	58	802	119	139	44	80	167	108	157	193	123	53	98	122	136	115	338	120	127	149	104	241	61	155	111	164	114	328	181	201	279	366
ENSG00000200403.1	chr1	19305076	19305182	-	107	23	23	8	4	9	17	23	13	26	26	33	31	5	23	13	0	32	12	8	5	7	38	5	13	33	4	6	53	29	7	14	19	22	18	1	17	1	31	45	67	22	22	44	15
ENSG00000040487.13	chr1;chr1;chr1;chr1;chr1;chr1;chr1;chr1;chr1;chr1;chr1;chr1;chr1;chr1;chr1;chr1;chr1;chr1;chr1;chr1;chr1;chr1;chr1;chr1;chr1;chr1;chr1;chr1;chr1;chr1;chr1;chr1;chr1;chr1;chr1;chr1;chr1;chr1;chr1;chr1;chr1;chr1;chr1;chr1;chr1;chr1	19312326;19312326;19312330;19312341;19312729;19312729;19312729;19312729;19317600;19317600;19317600;19324633;19324633;19324633;19324633;19324633;19324754;19325495;19325495;19325495;19325495;19325526;19325526;19326245;19326245;19326245;19326245;19326245;19326245;19326531;19326531;19326531;19326531;19326531;19326531;19327227;19327227;19327227;19327227;19327227;19327571;19328572;19328572;19328572;193…	19312889;19312358;19312358;19312358;19312889;19312889;19312889;19312889;19317841;19317841;19317841;19324762;19324762;19324762;19324762;19324762;19324762;19325582;19325582;19325582;19325582;19325582;19325582;19326387;19326387;19326387;19326387;19326387;19326387;19326623;19326623;19326623;19326623;19326623;19326623;19327412;19327412;19327412;19327412;19327412;19328081;19328987;19329300;19329284;193…	+;+;+;+;+;+;+;+;+;+;+;+;+;+;+;+;+;+;+;+;+;+;+;+;+;+;+;+;+;+;+;+;+;+;+;+;+;+;+;+;+;+;+;+;+;+	2686	89	55	26	91	149	120	74	81	173	109	242	140	31	218	173	100	79	37	77	66	125	170	200	36	98	68	103	136	146	90	78	129	127	199	127	41	191	106	65	163	61	191	238	137
ENSG00000077549.19	chr1;chr1;chr1;chr1;chr1;chr1;chr1;chr1;chr1;chr1;chr1;chr1;chr1;chr1;chr1;chr1;chr1;chr1;chr1;chr1;chr1;chr1;chr1;chr1;chr1;chr1;chr1;chr1;chr1;chr1;chr1;chr1;chr1;chr1;chr1;chr1;chr1;chr1;chr1;chr1;chr1;chr1;chr1;chr1;chr1;chr1;chr1;chr1;chr1;chr1;chr1;chr1;chr1;chr1;chr1;chr1;chr1;chr1;chr1;chr1;chr1;chr1;chr1;chr1;chr1;chr1;chr1;chr1;chr1;chr1;chr1;chr1;chr1;chr1;chr1;chr1;chr1;chr1;chr1;chr1…	19338775;19338776;19338823;19339137;19339137;19339137;19339231;19339245;19339325;19339359;19339374;19342752;19342752;19344358;19344358;19344358;19344358;19344358;19344358;19344358;19344358;19345187;19345187;19345187;19345187;19345187;19345187;19345187;19345187;19345187;19356635;19356635;19356635;19356635;19356635;19356635;19356635;19356635;19356635;19356635;19356655;19356747;19357422;19357422;193…	19339617;19339617;19339617;19339617;19339617;19339617;19339617;19344434;19342864;19339617;19344434;19342864;19342864;19344434;19344434;19345252;19345252;19344434;19344434;19344434;19344434;19345252;19345252;19345252;19345252;19345252;19346362;19345252;19345252;19345252;19356751;19356751;19356751;19356751;19356751;19356751;19356751;19356751;19356751;19356751;19356751;19356751;19357563;19357563;193…	-;-;-;-;-;-;-;-;-;-;-;-;-;-;-;-;-;-;-;-;-;-;-;-;-;-;-;-;-;-;-;-;-;-;-;-;-;-;-;-;-;-;-;-;-;-;-;-;-;-;-;-;-;-;-;-;-;-;-;-;-;-;-;-;-;-;-;-;-;-;-;-;-;-;-;-;-;-;-;-;-;-;-;-;-;-;-;-;-;-;-;-;-;-;-;-;-;-;-;-;-;-;-;-;-;-;-	19094	2631	1139	1207	1433	7716	3535	3302	1248	2411	1530	4499	3172	753	6163	3147	2129	978	1747	3328	2211	2176	2426	1309	962	2702	2229	2687	2889	5944	2486	1755	2581	4215	3120	1479	1932	1546	2298	1903	5637	2213	2985	2688	3261
ENSG00000240490.3	chr1	19424384	19424671	+	288	28	11	18	11	31	26	49	12	11	27	17	14	15	101	28	16	13	17	12	36	20	9	19	7	15	23	27	21	39	12	10	55	19	38	17	12	9	31	16	12	23	49	7	14
ENSG00000173436.15	chr1;chr1;chr1;chr1;chr1;chr1;chr1;chr1;chr1;chr1;chr1;chr1;chr1;chr1;chr1;chr1;chr1;chr1;chr1;chr1;chr1;chr1;chr1;chr1;chr1;chr1;chr1;chr1;chr1;chr1;chr1;chr1;chr1;chr1;chr1;chr1;chr1;chr1;chr1;chr1;chr1;chr1;chr1	19484403;19596977;19596979;19596983;19596991;19596995;19597001;19597039;19597041;19597052;19597070;19597834;19597834;19600787;19600787;19600787;19614501;19617258;19622100;19622100;19622100;19622100;19622100;19622100;19622100;19622100;19623474;19623474;19623474;19623474;19623474;19623474;19623474;19623474;19623474;19625392;19626387;19626387;19626387;19626387;19626387;19626387;19626387	19484655;19597109;19597109;19597109;19597109;19597109;19597109;19597109;19597109;19597109;19597109;19597853;19598195;19601304;19600971;19600971;19614594;19617336;19622147;19622147;19622147;19622147;19622147;19622147;19622147;19622147;19623583;19623583;19623583;19623551;19623583;19623790;19623583;19623583;19623583;19625632;19626606;19626629;19626587;19626623;19629820;19629821;19626630	+;+;+;+;+;+;+;+;+;+;+;+;+;+;+;+;+;+;+;+;+;+;+;+;+;+;+;+;+;+;+;+;+;+;+;+;+;+;+;+;+;+;+	5480	98	61	41	101	688	157	156	147	103	86	291	115	34	446	182	124	113	96	133	101	165	103	160	34	227	82	155	82	232	130	100	104	108	163	88	117	124	94	86	199	121	110	176	93
ENSG00000201609.1	chr1	19510593	19510733	+	141	0	0	0	0	9	4	9	0	19	0	22	0	0	94	1	0	14	0	0	2	0	0	3	0	1	0	0	0	61	0	0	0	0	0	0	0	0	0	0	0	0	0	0	6
ENSG00000235185.1	chr1;chr1	19591802;19596710	19591885;19596832	-;-	207	1	0	0	0	10	0	0	12	0	0	0	5	0	37	0	3	10	0	0	0	27	0	29	4	0	0	0	0	11	0	0	0	0	1	7	0	48	0	0	0	0	0	0	5
ENSG00000158747.15	chr1;chr1;chr1;chr1;chr1;chr1;chr1;chr1;chr1;chr1;chr1;chr1;chr1;chr1;chr1;chr1;chr1;chr1;chr1;chr1;chr1;chr1;chr1;chr1;chr1;chr1;chr1;chr1;chr1;chr1;chr1;chr1;chr1;chr1;chr1;chr1;chr1;chr1;chr1;chr1;chr1;chr1;chr1;chr1;chr1;chr1;chr1;chr1;chr1;chr1;chr1;chr1;chr1;chr1;chr1	19596979;19640554;19643232;19643409;19643409;19643714;19643714;19644311;19645372;19645372;19645766;19645766;19647610;19647610;19655012;19655012;19655012;19655012;19655012;19655012;19655012;19655012;19655012;19655012;19655012;19655012;19655012;19655012;19655324;19655324;19655324;19655324;19655324;19655324;19655324;19655324;19655324;19655324;19655324;19655324;19655324;19655324;19656866;19656866;196…	19597109;19640729;19643397;19643625;19643625;19643954;19643954;19644446;19645530;19645530;19646033;19646033;19647670;19647670;19655200;19655200;19655200;19655200;19655200;19655200;19655200;19655200;19655200;19655200;19655200;19655200;19655200;19655200;19655435;19655435;19655436;19655435;19655435;19655435;19655435;19655435;19655435;19655435;19655435;19655435;19655435;19655435;19658456;19657076;196…	+;+;+;+;+;+;+;+;+;+;+;+;+;+;+;+;+;+;+;+;+;+;+;+;+;+;+;+;+;+;+;+;+;+;+;+;+;+;+;+;+;+;+;+;+;+;+;+;+;+;+;+;+;+;+	3448	726	431	440	286	2919	579	1187	398	599	1213	3506	1368	654	5067	924	1136	394	427	847	919	967	1036	405	712	531	1115	1716	664	2159	956	273	1171	2319	912	614	426	575	1423	1185	3258	779	1303	767	2379
ENSG00000270136.6	chr1;chr1;chr1;chr1;chr1;chr1;chr1;chr1;chr1;chr1;chr1;chr1;chr1;chr1;chr1;chr1;chr1;chr1;chr1;chr1;chr1;chr1;chr1;chr1	19597067;19597067;19597068;19600787;19617258;19622100;19622100;19623474;19623474;19626387;19626387;19634437;19634437;19640346;19640584;19655012;19655012;19655012;19655324;19655324;19655324;19656866;19656866;19656866	19597109;19597109;19597109;19600971;19617336;19622147;19622147;19623583;19623583;19626476;19626476;19634524;19634524;19640469;19640729;19655200;19655200;19655200;19655435;19655435;19655435;19656927;19656926;19656914	+;+;+;+;+;+;+;+;+;+;+;+;+;+;+;+;+;+;+;+;+;+;+;+	1276	0	0	0	0	0	0	0	4	0	0	0	0	0	0	0	0	0	0	0	0	13	0	8	0	0	0	1	0	12	0	0	0	0	0	3	0	3	0	0	0	0	0	0	0
ENSG00000226396.1	chr1	19608114	19608568	+	455	16	11	12	13	81	36	42	85	14	27	22	43	14	132	23	40	29	44	28	33	54	51	113	14	34	15	17	36	63	37	45	35	22	37	27	5	79	21	20	21	22	30	27	7
ENSG00000158748.4	chr1;chr1;chr1	19664875;19678567;19678919	19666467;19678725;19680966	+;+;+	3800	34	46	4	15	49	21	33	69	58	5	64	44	19	21	39	90	36	60	15	0	146	18	178	14	1	16	55	17	36	14	64	45	49	19	54	28	146	8	26	37	4	10	34	9
ENSG00000162542.13	chr1;chr1;chr1;chr1;chr1;chr1;chr1;chr1;chr1;chr1;chr1;chr1;chr1;chr1;chr1;chr1;chr1;chr1;chr1;chr1;chr1;chr1;chr1;chr1;chr1;chr1;chr1;chr1;chr1;chr1;chr1;chr1;chr1;chr1;chr1;chr1;chr1;chr1;chr1;chr1;chr1;chr1;chr1;chr1;chr1;chr1;chr1;chr1;chr1;chr1;chr1;chr1;chr1;chr1;chr1;chr1;chr1;chr1;chr1;chr1;chr1;chr1;chr1;chr1	19682213;19682240;19682242;19683288;19694434;19694434;19694434;19694492;19700768;19700768;19700768;19700768;19737372;19737372;19737372;19737372;19738222;19739824;19739824;19739824;19740777;19740777;19740777;19745532;19745532;19746456;19746456;19746456;19747163;19747163;19747163;19747163;19750081;19755634;19755634;19755634;19755634;19755634;19770542;19770542;19770542;19770542;19770542;19771308;197…	19683444;19682714;19683444;19683444;19694551;19694551;19694551;19694551;19701210;19700885;19700885;19700885;19737456;19737456;19737456;19737456;19738419;19739960;19739960;19739960;19740941;19740941;19740941;19745651;19745651;19746599;19746599;19746599;19747260;19747260;19747260;19747260;19750372;19755766;19755766;19755766;19755766;19755766;19770569;19770569;19770569;19770569;19770569;19771427;197…	-;-;-;-;-;-;-;-;-;-;-;-;-;-;-;-;-;-;-;-;-;-;-;-;-;-;-;-;-;-;-;-;-;-;-;-;-;-;-;-;-;-;-;-;-;-;-;-;-;-;-;-;-;-;-;-;-;-;-;-;-;-;-;-	4054	328	141	212	211	334	520	500	256	469	282	547	415	149	364	317	411	178	360	331	352	450	203	345	80	223	418	410	346	465	225	501	244	558	384	220	421	369	197	222	162	302	264	570	307
ENSG00000178828.7	chr1	19814029	19815283	-	1255	0	0	0	0	0	0	0	12	10	0	0	0	0	0	0	3	23	0	0	0	6	0	8	0	0	0	0	0	0	0	0	0	0	0	3	0	20	0	0	0	0	0	2	0
ENSG00000235434.1	chr1;chr1	19814367;19819243	19814553;19819502	+;+	447	0	0	0	0	0	0	0	2	0	0	0	0	0	0	0	0	0	0	0	0	9	0	3	0	0	0	2	0	0	0	0	0	0	0	0	0	2	0	0	0	1	0	0	0
ENSG00000169914.6	chr1;chr1;chr1;chr1;chr1;chr1;chr1;chr1;chr1;chr1;chr1;chr1;chr1	19882395;19890385;19890458;19894368;19894368;19897540;19897540;19904267;19904891;19906432;19906565;19906728;19907570	19882734;19890533;19890533;19894480;19894480;19897815;19897662;19904398;19904987;19906616;19906616;19906944;19912945	+;+;+;+;+;+;+;+;+;+;+;+;+	6885	219	193	139	214	350	623	385	335	272	215	330	317	87	645	794	309	208	338	254	181	399	330	300	99	948	180	281	300	258	304	280	380	261	257	318	260	230	178	151	335	427	284	369	227
ENSG00000188784.4	chr1;chr1;chr1;chr1	19920009;19922298;19922617;19923520	19920449;19922404;19922755;19923617	-;-;-;-	785	0	0	0	0	0	4	0	24	0	0	0	0	0	0	0	11	28	0	0	0	54	0	56	0	5	0	2	0	1	0	0	0	0	0	2	0	17	0	0	0	0	0	0	0
ENSG00000242688.3	chr1	19970969	19971269	+	301	0	0	0	0	0	0	0	16	0	0	0	0	0	0	0	0	4	0	0	0	4	0	19	0	0	0	0	0	0	0	0	0	1	0	0	0	11	0	0	0	0	0	0	0
ENSG00000188257.12	chr1;chr1;chr1;chr1;chr1;chr1;chr1;chr1;chr1;chr1;chr1;chr1;chr1;chr1;chr1;chr1;chr1;chr1;chr1;chr1;chr1;chr1;chr1;chr1;chr1;chr1	19975431;19975431;19975438;19975438;19975673;19978015;19978015;19978015;19978015;19978015;19978246;19978380;19978380;19978380;19978380;19978734;19978734;19978734;19978734;19978734;19979580;19979580;19979580;19979580;19979580;19980362	19975843;19975843;19975843;19975843;19975843;19978121;19978121;19978879;19978121;19978121;19978484;19978524;19978524;19978484;19978524;19979067;19978879;19978879;19978911;19978879;19979618;19979614;19979690;19979621;19979607;19980416	-;-;-;-;-;-;-;-;-;-;-;-;-;-;-;-;-;-;-;-;-;-;-;-;-;-	1632	16	299	159	82	4	176	32	167	151	20	25	81	14	16	68	46	59	935	1240	59	179	59	133	14	427	613	84	40	85	155	19	24	348	70	61	645	118	37	309	57	170	17	38	8
ENSG00000127472.11	chr1;chr1;chr1;chr1;chr1;chr1;chr1;chr1;chr1;chr1;chr1;chr1;chr1;chr1;chr1;chr1;chr1;chr1;chr1;chr1;chr1;chr1;chr1;chr1;chr1;chr1;chr1;chr1;chr1;chr1;chr1;chr1;chr1;chr1;chr1;chr1;chr1;chr1;chr1;chr1;chr1;chr1;chr1;chr1;chr1;chr1;chr1;chr1;chr1;chr1;chr1;chr1;chr1;chr1;chr1;chr1	20028179;20028430;20028434;20028526;20028526;20028571;20046102;20054792;20059632;20059632;20059632;20059632;20059632;20059632;20063484;20066024;20068873;20068873;20068873;20068873;20068873;20068873;20070194;20070294;20070294;20070294;20070295;20070845;20076761;20084821;20084821;20084821;20084821;20084821;20084821;20084821;20086083;20086083;20086083;20086083;20086083;20086083;20086083;20088825;200…	20028709;20028709;20028709;20028709;20028709;20028709;20046141;20054839;20059692;20059692;20059692;20059692;20059692;20059692;20063602;20066129;20069034;20069032;20069032;20069032;20069032;20069032;20070465;20070414;20070465;20070465;20070465;20070944;20076898;20084870;20084870;20084870;20084870;20084870;20084870;20084870;20086227;20086227;20086227;20086227;20086227;20086227;20086227;20088901;200…	+;+;+;+;+;+;+;+;+;+;+;+;+;+;+;+;+;+;+;+;+;+;+;+;+;+;+;+;+;+;+;+;+;+;+;+;+;+;+;+;+;+;+;+;+;+;+;+;+;+;+;+;+;+;+;+	3342	52	10	2	16	0	13	45	174	18	1	3	62	12	15	21	101	155	21	115	7	198	33	254	29	28	38	57	2	25	5	1	50	40	28	30	6	170	18	20	11	9	12	12	2
ENSG00000117215.15	chr1;chr1;chr1;chr1;chr1;chr1;chr1	20111939;20112657;20115507;20116333;20116333;20119459;20119459	20114259;20114259;20115613;20116477;20116477;20119536;20119566	-;-;-;-;-;-;-	2681	0	0	0	25	12	205	11	97	5	3	4	4	3	3	20	16	24	19	21	58	212	0	149	1	139	0	24	21	56	3	4	11	42	19	28	7	99	0	2	5	10	67	3	9
ENSG00000158786.5	chr1;chr1;chr1;chr1;chr1;chr1;chr1	20139323;20139330;20140166;20140166;20143446;20144580;20148190	20139543;20139543;20144080;20140218;20143590;20144689;20150381	+;+;+;+;+;+;+	6438	0	19	2	0	3	15	2	183	0	0	7	1	19	6	45	162	150	1	1	30	261	8	388	4	0	1	28	0	69	5	0	17	2	29	21	0	255	12	3	9	15	0	3	0
ENSG00000227066.2	chr1;chr1;chr1;chr1;chr1;chr1;chr1;chr1	20154171;20154338;20154433;20157692;20159612;20159612;20159630;20159630	20154463;20154463;20154587;20159247;20160568;20160568;20160566;20160568	+;+;+;+;+;+;+;+	2930	1	0	0	0	28	2	3	204	1	0	23	10	0	6	6	38	118	7	28	18	193	7	201	7	0	0	9	9	28	4	0	21	3	6	7	0	83	22	4	49	0	1	32	0
ENSG00000187980.7	chr1;chr1;chr1;chr1;chr1;chr1;chr1;chr1;chr1;chr1;chr1;chr1;chr1;chr1;chr1;chr1	20161253;20163055;20163092;20163991;20172794;20172794;20172794;20175007;20175007;20175007;20175007;20177324;20177324;20184242;20186360;20186360	20164157;20164157;20163296;20164157;20172897;20172891;20172897;20175194;20175169;20175145;20175145;20177439;20177424;20184624;20186486;20186518	-;-;-;-;-;-;-;-;-;-;-;-;-;-;-;-	3855	23	2	24	9	114	16	9	134	13	9	85	7	20	5	2	61	103	36	1	14	156	13	230	7	0	4	59	4	89	24	3	19	9	0	23	8	113	16	15	104	31	6	11	13
ENSG00000162543.6	chr1;chr1	20186096;20190547	20186153;20196050	+;+	5562	172	15	58	71	560	85	80	292	178	32	237	180	28	158	231	219	161	179	41	42	284	182	175	27	10	150	208	59	332	64	287	51	95	34	123	38	212	76	127	222	92	38	187	123
ENSG00000228105.2	chr1;chr1;chr1;chr1;chr1	20243095;20243120;20243388;20244296;20244296	20243214;20243214;20243544;20244655;20244664	+;+;+;+;+	646	0	0	0	0	0	0	0	13	0	0	0	1	0	0	0	0	15	0	0	0	31	0	48	0	0	0	9	0	0	0	0	0	0	0	0	0	28	0	0	0	0	0	0	0
ENSG00000284710.1	chr1;chr1;chr1;chr1;chr1	20272018;20272479;20272860;20274289;20274796	20272108;20273703;20273599;20274401;20275005	+;+;+;+;+	1639	0	0	0	0	0	0	0	77	0	0	0	0	0	0	7	28	6	0	0	0	132	0	111	9	0	0	5	0	36	0	0	0	0	0	3	4	81	0	0	0	0	0	0	0
ENSG00000158816.15	chr1;chr1;chr1;chr1;chr1;chr1;chr1;chr1;chr1;chr1;chr1;chr1;chr1;chr1;chr1;chr1;chr1;chr1;chr1;chr1;chr1;chr1;chr1;chr1;chr1;chr1;chr1;chr1;chr1;chr1;chr1;chr1;chr1;chr1;chr1;chr1;chr1;chr1;chr1;chr1;chr1;chr1;chr1;chr1;chr1;chr1;chr1;chr1;chr1;chr1;chr1;chr1;chr1;chr1;chr1;chr1;chr1;chr1;chr1;chr1;chr1;chr1;chr1;chr1;chr1;chr1;chr1;chr1;chr1;chr1;chr1;chr1;chr1;chr1;chr1;chr1;chr1;chr1;chr1;chr1…	20290919;20290919;20290919;20290937;20303081;20303081;20310576;20310576;20310576;20310576;20310576;20310576;20312836;20312836;20312836;20312836;20312836;20312836;20314322;20314322;20314322;20314322;20314378;20317530;20317530;20317530;20317530;20318424;20318590;20318590;20318590;20319382;20319382;20319382;20319382;20323356;20323356;20323356;20323356;20327890;20327890;20327890;20327890;20330180;203…	20291088;20291088;20291088;20291088;20303212;20303349;20310740;20310740;20310740;20310740;20310740;20310740;20312988;20312942;20312988;20312988;20312988;20312988;20314412;20314592;20314592;20314592;20314592;20317675;20317675;20317675;20317675;20318721;20318721;20318721;20318721;20319506;20319506;20319506;20319506;20323532;20323532;20323532;20323532;20328000;20328000;20328000;20328000;20330382;203…	+;+;+;+;+;+;+;+;+;+;+;+;+;+;+;+;+;+;+;+;+;+;+;+;+;+;+;+;+;+;+;+;+;+;+;+;+;+;+;+;+;+;+;+;+;+;+;+;+;+;+;+;+;+;+;+;+;+;+;+;+;+;+;+;+;+;+;+;+;+;+;+;+;+;+;+;+;+;+;+;+;+;+;+;+;+;+;+;+;+;+;+;+;+;+;+;+;+;+;+;+;+;+;+;+;+;+;+;+;+	6377	2	0	7	1	0	10	5	291	2	17	2	0	0	0	4	129	236	19	1	4	283	37	489	8	0	0	79	0	63	0	23	0	6	37	35	4	435	8	53	2	110	5	133	11
ENSG00000226664.1	chr1;chr1	20294211;20323103	20294354;20323187	-;-	229	0	0	0	0	0	0	0	41	14	0	0	0	0	0	0	15	20	0	0	0	17	0	21	0	0	0	17	0	3	0	0	0	0	0	18	0	32	0	0	3	0	0	0	2
ENSG00000236963.7	chr1;chr1;chr1;chr1;chr1;chr1;chr1;chr1;chr1;chr1;chr1;chr1;chr1;chr1;chr1;chr1;chr1;chr1;chr1;chr1;chr1;chr1;chr1;chr1;chr1;chr1;chr1;chr1;chr1;chr1;chr1;chr1;chr1;chr1;chr1;chr1;chr1;chr1;chr1;chr1;chr1;chr1;chr1;chr1;chr1;chr1;chr1;chr1;chr1;chr1;chr1;chr1;chr1;chr1;chr1;chr1;chr1;chr1;chr1;chr1;chr1;chr1;chr1;chr1;chr1;chr1;chr1;chr1;chr1;chr1;chr1;chr1;chr1;chr1	20360579;20362144;20372940;20372969;20373595;20373595;20377381;20378311;20378973;20398080;20398080;20398080;20398099;20398101;20398101;20398105;20398483;20398483;20398483;20398483;20398483;20398483;20398483;20398483;20398716;20399480;20399480;20399480;20399480;20399480;20399480;20399480;20399480;20400935;20400935;20400935;20400935;20402774;20405575;20405575;20405575;20405575;20405575;20405575;204…	20362041;20362394;20373738;20373397;20373738;20373738;20377509;20378432;20379026;20398225;20398225;20398225;20398225;20398225;20398225;20398225;20398787;20398787;20398729;20398738;20398787;20398729;20398787;20398787;20398738;20399549;20399549;20399549;20399549;20399549;20399549;20399549;20399549;20400987;20400987;20400987;20400987;20402846;20405694;20405694;20405694;20405694;20405694;20405694;204…	-;-;-;-;-;-;-;-;-;-;-;-;-;-;-;-;-;-;-;-;-;-;-;-;-;-;-;-;-;-;-;-;-;-;-;-;-;-;-;-;-;-;-;-;-;-;-;-;-;-;-;-;-;-;-;-;-;-;-;-;-;-;-;-;-;-;-;-;-;-;-;-;-;-	4303	5	30	10	1	16	4	12	288	0	11	5	28	0	17	2	149	159	0	2	3	274	0	322	20	39	0	35	0	57	0	0	1	7	12	40	1	172	6	6	19	2	1	14	19
ENSG00000226487.1	chr1;chr1;chr1	20412304;20412568;20413144	20412482;20412654;20413253	-;-;-	376	0	0	1	0	0	0	0	11	0	0	0	0	0	0	0	0	0	0	0	0	5	0	22	0	0	0	0	0	0	0	0	0	0	0	1	0	32	0	0	0	0	0	0	1
ENSG00000284641.1	chr1;chr1;chr1;chr1	20476222;20476630;20477992;20477992	20476405;20476839;20478793;20478937	+;+;+;+	1340	0	0	0	0	1	0	0	30	0	0	0	0	0	0	5	3	2	5	0	0	14	0	33	0	0	0	11	0	8	0	0	0	0	0	1	0	23	2	0	0	20	0	0	0
ENSG00000284743.1	chr1;chr1	20478779;20480297	20479351;20480397	-;-	674	0	0	0	0	0	0	0	26	0	59	0	0	0	0	0	8	14	0	0	0	28	0	33	0	0	0	5	0	14	0	0	0	0	5	10	0	17	3	0	0	0	0	0	0
ENSG00000162545.6	chr1;chr1;chr1;chr1	20482391;20483187;20484367;20485214	20483719;20483719;20484645;20486210	-;-;-;-	2605	424	199	210	88	632	157	521	196	80	112	495	1025	215	420	2377	407	188	355	396	313	287	557	146	143	98	262	444	327	640	337	700	197	536	281	155	100	92	216	310	2159	359	531	940	58
ENSG00000090432.7	chr1;chr1;chr1;chr1	20499448;20502069;20503222;20507905	20501419;20502189;20503309;20508151	-;-;-;-	2428	139	95	62	66	266	347	184	146	159	206	269	162	84	330	124	120	85	128	128	209	180	191	170	48	212	225	166	141	151	106	318	154	171	151	87	95	150	179	166	178	155	157	168	215
ENSG00000215520.3	chr1	20525989	20526751	+	763	0	0	0	2	0	0	0	12	0	0	0	6	0	0	0	6	18	0	1	2	31	1	18	0	0	0	0	0	0	0	0	0	0	0	0	0	14	0	13	7	0	0	9	0
ENSG00000183114.8	chr1	20552573	20555020	+	2448	33	0	0	9	7	5	9	29	15	10	12	2	0	4	8	71	11	0	4	1	72	4	104	7	1	3	15	9	7	21	0	58	23	2	7	2	95	54	56	0	14	0	41	16
ENSG00000158825.6	chr1;chr1;chr1;chr1;chr1;chr1;chr1	20589086;20589097;20604928;20604928;20613842;20618452;20618452	20589283;20589283;20605039;20605039;20613899;20618903;20618903	+;+;+;+;+;+;+	820	10	20	0	16	11	1	10	35	2	10	14	8	3	3	0	56	42	0	10	28	76	0	96	5	3	24	11	4	7	14	8	11	9	2	0	5	73	3	6	0	1	24	7	20
ENSG00000158828.8	chr1;chr1;chr1;chr1;chr1;chr1;chr1;chr1;chr1;chr1;chr1;chr1;chr1;chr1;chr1;chr1;chr1	20633458;20637842;20638129;20639892;20644490;20644490;20645508;20645560;20645560;20648505;20648505;20648505;20648995;20648995;20650434;20650434;20650434	20633935;20638129;20639992;20639992;20644672;20644672;20645723;20645723;20645723;20649231;20648632;20648632;20649231;20649231;20651510;20651316;20651511	+;+;+;+;+;+;+;+;+;+;+;+;+;+;+;+;+	4833	184	110	16	53	193	314	291	150	132	326	639	175	47	438	181	320	93	96	127	265	252	160	142	56	174	214	246	168	205	184	189	117	356	205	98	129	149	191	316	239	248	157	274	219
ENSG00000284005.1	chr1	20633679	20633788	+	110	0	0	0	0	0	0	0	0	0	0	0	0	0	0	0	0	0	0	0	0	0	0	0	0	0	0	0	0	0	0	0	0	0	0	0	0	0	0	0	0	0	0	0	0
ENSG00000117242.7	chr1;chr1;chr1	20642657;20645585;20648315	20643118;20645686;20652193	-;-;-	4443	38	27	12	13	42	33	44	100	48	79	123	112	11	184	170	95	58	67	63	37	98	9	84	31	62	63	42	94	82	51	56	128	55	60	47	19	46	83	66	99	69	38	30	33
ENSG00000244038.11	chr1;chr1;chr1;chr1;chr1;chr1;chr1;chr1;chr1;chr1;chr1;chr1;chr1;chr1;chr1;chr1;chr1;chr1;chr1;chr1;chr1;chr1;chr1;chr1;chr1;chr1;chr1;chr1;chr1;chr1	20651767;20651777;20652621;20652621;20652634;20652851;20652851;20652851;20653627;20653627;20654223;20654223;20654614;20654614;20655440;20655440;20655440;20655676;20655676;20655676;20656101;20656101;20660399;20660881;20660881;20660881;20661197;20661197;20661197;20661197	20652528;20652528;20652727;20652727;20652727;20653084;20652971;20652971;20653774;20653774;20654371;20654371;20654707;20654707;20655534;20655534;20655534;20655779;20655779;20655779;20656187;20656187;20660991;20660991;20660991;20660991;20661369;20661388;20661369;20661544	-;-;-;-;-;-;-;-;-;-;-;-;-;-;-;-;-;-;-;-;-;-;-;-;-;-;-;-;-;-	2721	386	260	239	316	782	1946	659	189	477	454	846	577	129	787	586	329	176	682	730	775	422	537	212	155	2025	413	411	272	444	376	734	579	644	533	262	595	252	283	361	616	469	683	471	538
ENSG00000117245.13	chr1;chr1;chr1;chr1;chr1;chr1;chr1;chr1;chr1;chr1;chr1;chr1;chr1;chr1;chr1;chr1;chr1;chr1;chr1;chr1;chr1;chr1;chr1;chr1;chr1;chr1;chr1;chr1;chr1;chr1;chr1;chr1;chr1;chr1;chr1;chr1;chr1;chr1;chr1;chr1;chr1;chr1;chr1;chr1;chr1;chr1;chr1;chr1;chr1;chr1;chr1;chr1;chr1;chr1;chr1;chr1;chr1;chr1;chr1;chr1;chr1;chr1;chr1;chr1;chr1;chr1;chr1;chr1;chr1;chr1;chr1;chr1;chr1;chr1;chr1;chr1	20664014;20664014;20664014;20664014;20664014;20664016;20664388;20666214;20666214;20666214;20666214;20666214;20666214;20670421;20670421;20670421;20670421;20670421;20670421;20670429;20671938;20671938;20671938;20671938;20671938;20671938;20671938;20672016;20672880;20682653;20682653;20682653;20682653;20682653;20682653;20682653;20684809;20684809;20684809;20684809;20684809;20684809;20684809;20685252;206…	20664762;20664762;20664762;20664762;20664204;20664762;20664590;20666331;20666331;20666331;20666331;20666331;20666331;20670491;20670491;20670488;20670491;20670491;20670488;20670488;20672196;20672196;20672196;20672196;20672196;20672196;20672196;20672196;20673020;20682884;20682884;20682884;20682884;20682884;20682884;20682884;20685020;20685020;20685020;20685020;20685020;20685020;20685187;20685283;206…	-;-;-;-;-;-;-;-;-;-;-;-;-;-;-;-;-;-;-;-;-;-;-;-;-;-;-;-;-;-;-;-;-;-;-;-;-;-;-;-;-;-;-;-;-;-;-;-;-;-;-;-;-;-;-;-;-;-;-;-;-;-;-;-;-;-;-;-;-;-;-;-;-;-;-;-	4470	43	0	7	5	21	29	25	125	3	38	21	13	0	8	14	100	169	32	14	4	188	13	313	9	0	22	28	12	36	25	3	29	19	54	23	1	272	20	44	51	10	12	44	28
ENSG00000235432.1	chr1;chr1;chr1;chr1	20692734;20693089;20693583;20693870	20692775;20693232;20693731;20694013	-;-;-;-	479	0	0	0	0	0	0	0	24	0	0	0	0	0	0	0	1	6	0	0	0	15	0	17	0	0	0	0	0	5	0	0	0	0	0	13	0	28	1	3	0	0	0	0	0
ENSG00000189410.12	chr1;chr1;chr1;chr1;chr1;chr1;chr1;chr1;chr1;chr1;chr1;chr1;chr1;chr1;chr1;chr1;chr1;chr1;chr1;chr1;chr1;chr1;chr1;chr1;chr1;chr1;chr1;chr1;chr1;chr1;chr1;chr1;chr1;chr1;chr1;chr1;chr1;chr1;chr1;chr1;chr1;chr1;chr1;chr1;chr1;chr1	20719731;20719732;20719732;20722756;20722756;20722756;20723626;20723626;20723626;20724083;20724083;20724083;20724349;20724396;20724396;20724601;20724631;20725920;20725920;20725920;20725920;20725932;20727001;20727001;20727001;20727001;20727032;20727469;20727523;20727523;20727523;20727523;20727523;20727958;20727958;20727958;20727958;20727958;20730746;20731012;20731448;20732181;20732181;20732181;207…	20721995;20721995;20721995;20722915;20722915;20722915;20723734;20723734;20723734;20724251;20724251;20724251;20724635;20724635;20724635;20724635;20724635;20726066;20726066;20726066;20726066;20726066;20727075;20727075;20727075;20727075;20727075;20727603;20727603;20727603;20727603;20727603;20727603;20728086;20728086;20728086;20728086;20728086;20730851;20731175;20731591;20732278;20732640;20732703;207…	-;-;-;-;-;-;-;-;-;-;-;-;-;-;-;-;-;-;-;-;-;-;-;-;-;-;-;-;-;-;-;-;-;-;-;-;-;-;-;-;-;-;-;-;-;-	4487	4	6	0	2	22	0	7	116	1	0	0	4	0	1	30	64	78	0	25	0	140	1	232	1	0	1	30	3	27	5	6	30	10	0	11	3	183	0	6	0	0	0	3	4
ENSG00000233069.1	chr1;chr1	20732880;20733800	20733025;20733952	+;+	299	0	0	4	0	0	0	0	4	0	0	0	0	0	0	0	0	12	0	0	0	3	0	21	0	0	0	0	0	0	0	0	0	0	0	1	0	23	0	0	0	0	0	0	0
ENSG00000127483.19	chr1;chr1;chr1;chr1;chr1;chr1;chr1;chr1;chr1;chr1;chr1;chr1;chr1;chr1;chr1;chr1;chr1;chr1;chr1;chr1;chr1;chr1;chr1;chr1;chr1;chr1;chr1;chr1;chr1;chr1;chr1;chr1;chr1;chr1;chr1;chr1;chr1;chr1;chr1;chr1;chr1;chr1;chr1;chr1;chr1;chr1;chr1;chr1;chr1;chr1;chr1;chr1;chr1;chr1;chr1;chr1;chr1;chr1;chr1;chr1;chr1;chr1;chr1;chr1;chr1;chr1;chr1;chr1;chr1;chr1;chr1;chr1;chr1;chr1;chr1;chr1;chr1;chr1;chr1;chr1…	20740266;20742679;20742682;20743135;20744744;20745543;20745543;20745543;20745543;20745592;20747544;20747544;20747544;20747544;20747544;20747615;20749723;20749723;20749723;20749723;20749723;20749723;20757166;20757166;20757166;20757166;20757199;20765377;20765377;20765377;20765377;20765377;20767584;20767584;20767584;20767584;20770930;20770930;20770930;20770930;20770930;20773451;20773451;20773451;207…	20745091;20745091;20745091;20743174;20745091;20745656;20745656;20745656;20745656;20745656;20747655;20747655;20747655;20747655;20747655;20747655;20749882;20750251;20749747;20749882;20749882;20749882;20757256;20757256;20757256;20757256;20757256;20765531;20765531;20765531;20765531;20765531;20767664;20767664;20767664;20767664;20771073;20771073;20771073;20771073;20771073;20773610;20773610;20775005;207…	-;-;-;-;-;-;-;-;-;-;-;-;-;-;-;-;-;-;-;-;-;-;-;-;-;-;-;-;-;-;-;-;-;-;-;-;-;-;-;-;-;-;-;-;-;-;-;-;-;-;-;-;-;-;-;-;-;-;-;-;-;-;-;-;-;-;-;-;-;-;-;-;-;-;-;-;-;-;-;-;-;-;-;-	9815	2319	1172	491	1527	2199	3763	3188	560	2108	1331	2304	2431	597	2829	2207	1218	593	1710	2144	2418	1491	2726	340	746	3964	2223	2096	2110	1475	2333	2015	2324	3284	2332	1261	1908	573	1270	1391	3141	1702	1864	2616	1179
ENSG00000075151.21	chr1;chr1;chr1;chr1;chr1;chr1;chr1;chr1;chr1;chr1;chr1;chr1;chr1;chr1;chr1;chr1;chr1;chr1;chr1;chr1;chr1;chr1;chr1;chr1;chr1;chr1;chr1;chr1;chr1;chr1;chr1;chr1;chr1;chr1;chr1;chr1;chr1;chr1;chr1;chr1;chr1;chr1;chr1;chr1;chr1;chr1;chr1;chr1;chr1;chr1;chr1;chr1;chr1;chr1;chr1;chr1;chr1;chr1;chr1;chr1;chr1;chr1;chr1;chr1;chr1;chr1;chr1;chr1;chr1;chr1;chr1;chr1;chr1;chr1;chr1;chr1;chr1;chr1;chr1;chr1…	20806292;20806470;20806483;20807004;20807319;20810738;20810738;20810738;20810738;20810738;20813158;20813158;20813158;20813158;20813158;20817392;20817392;20817392;20817392;20817392;20825100;20825100;20825100;20825100;20825100;20825104;20827617;20827617;20827617;20827617;20827617;20827617;20829147;20829147;20829147;20829147;20829147;20829147;20840856;20840856;20840856;20840856;20840856;20840856;208…	20807500;20807500;20807500;20807500;20807500;20810884;20810884;20810884;20810884;20810884;20813239;20813239;20813239;20813239;20813239;20817538;20817538;20817538;20817538;20817538;20825198;20825198;20825198;20825198;20825198;20825198;20827698;20827698;20827698;20827698;20827698;20827698;20829272;20829272;20829272;20829272;20829272;20829272;20841028;20841028;20841028;20841028;20841028;20841028;208…	-;-;-;-;-;-;-;-;-;-;-;-;-;-;-;-;-;-;-;-;-;-;-;-;-;-;-;-;-;-;-;-;-;-;-;-;-;-;-;-;-;-;-;-;-;-;-;-;-;-;-;-;-;-;-;-;-;-;-;-;-;-;-;-;-;-;-;-;-;-;-;-;-;-;-;-;-;-;-;-;-;-;-;-;-;-;-;-;-;-;-;-;-;-;-;-;-;-;-;-;-;-;-;-;-;-;-;-;-;-;-;-;-;-;-;-;-;-;-;-;-;-;-;-;-;-;-;-;-;-;-;-;-;-;-;-;-;-;-;-;-;-;-;-;-;-;-;-;-;-;-;-;-;-;-;-;-;-;-;-;-;-;-;-;-;-;-;-;-;-;-;-;-;-;-;-;-;-;-;-;-;-;-;-;-;-;-;-;-;-;-;-;-;-;-;-;-;-;-;-…	9596	2846	1007	923	1731	3849	3492	3575	901	1837	1274	3488	2869	370	3646	3093	1067	776	1861	1946	2022	1625	2736	656	834	2624	1924	2024	2257	2406	1895	2228	2128	3481	3091	1025	1758	884	1252	1460	3396	2479	1931	1859	1385
ENSG00000251914.1	chr1	20841241	20841302	+	62	0	0	0	0	0	0	2	0	0	0	0	0	0	0	1	0	0	0	0	0	0	0	0	0	0	0	0	0	3	0	0	0	0	0	0	0	0	0	0	0	0	0	0	0
ENSG00000221808.1	chr1	20988314	20988432	-	119	3	16	0	0	0	0	19	1	0	0	3	11	0	0	2	0	0	0	0	0	0	11	2	5	0	0	3	0	0	1	4	0	13	3	0	0	0	0	2	1	1	0	0	0
ENSG00000233072.1	chr1	21003550	21003934	-	385	49	80	4	27	25	15	18	9	26	35	13	24	8	62	22	24	6	26	4	12	16	22	8	2	18	7	19	47	19	13	37	82	82	12	18	13	7	3	8	49	9	16	37	9
ENSG00000236073.2	chr1	21073639	21073753	-	115	22	0	0	3	3	17	23	30	0	0	13	6	0	0	68	28	13	40	8	0	50	6	44	18	4	7	3	26	20	21	41	20	55	0	1	14	48	4	3	6	1	0	13	3
ENSG00000235112.1	chr1;chr1	21161475;21161988	21161676;21162081	+;+	296	4	20	0	5	1	9	29	11	0	32	7	5	1	53	4	3	8	0	9	22	8	6	8	0	5	12	8	23	7	16	3	1	9	5	0	0	1	2	3	82	20	0	4	0
ENSG00000287192.1	chr1	21177054	21178164	+	1111	16	0	0	0	16	1	4	37	17	6	0	40	3	8	30	9	50	7	3	0	65	5	72	0	3	4	17	3	31	9	7	3	33	4	1	0	43	0	2	9	7	2	0	0
ENSG00000117298.16	chr1;chr1;chr1;chr1;chr1;chr1;chr1;chr1;chr1;chr1;chr1;chr1;chr1;chr1;chr1;chr1;chr1;chr1;chr1;chr1;chr1;chr1;chr1;chr1;chr1;chr1;chr1;chr1;chr1;chr1;chr1;chr1;chr1;chr1;chr1;chr1;chr1;chr1;chr1;chr1;chr1;chr1;chr1;chr1;chr1;chr1;chr1;chr1;chr1;chr1;chr1;chr1;chr1;chr1;chr1;chr1;chr1;chr1;chr1;chr1;chr1;chr1;chr1;chr1;chr1;chr1;chr1;chr1;chr1;chr1;chr1;chr1;chr1;chr1;chr1;chr1;chr1;chr1;chr1;chr1…	21217247;21217250;21217281;21218584;21219814;21219894;21219937;21219959;21221747;21221747;21221747;21221747;21221747;21221747;21225250;21225250;21225250;21225250;21225250;21225250;21227159;21227159;21227159;21227159;21227159;21227159;21227931;21227931;21227931;21227931;21227931;21227931;21233105;21233558;21233558;21233558;21233558;21233558;21233558;21233570;21235850;21235850;21235850;21235850;212…	21220131;21220131;21217978;21220131;21220131;21220131;21220131;21220131;21221842;21221842;21222081;21221842;21221842;21221842;21225440;21225440;21225440;21225440;21225440;21225440;21227226;21227226;21227226;21227226;21227226;21227226;21228041;21228041;21228041;21228041;21228041;21228041;21233661;21233661;21233661;21233661;21233661;21233661;21233661;21233661;21235927;21235927;21235927;21235927;212…	-;-;-;-;-;-;-;-;-;-;-;-;-;-;-;-;-;-;-;-;-;-;-;-;-;-;-;-;-;-;-;-;-;-;-;-;-;-;-;-;-;-;-;-;-;-;-;-;-;-;-;-;-;-;-;-;-;-;-;-;-;-;-;-;-;-;-;-;-;-;-;-;-;-;-;-;-;-;-;-;-;-;-;-;-;-;-;-;-;-;-;-;-;-;-;-;-;-;-;-;-;-;-;-;-;-;-;-;-;-;-;-;-;-;-;-;-;-;-;-;-;-;-;-;-;-;-;-;-;-;-;-;-;-;-;-;-;-;-;-;-;-;-;-;-;-;-;-;-;-;-;-	7308	1119	297	748	689	530	2721	2033	636	1068	1231	2453	1244	389	2369	1488	1315	356	1317	2546	1389	1094	2410	641	620	1384	1464	1433	1704	739	1297	1514	1612	2138	1749	784	1374	1004	1007	1181	1441	1200	654	1845	1504
ENSG00000236936.1	chr1;chr1;chr1	21266082;21266490;21266848	21266135;21266754;21267251	+;+;+	723	15	20	55	44	9	55	31	34	93	0	50	23	29	39	98	55	51	30	23	58	87	48	49	12	39	7	70	61	13	40	26	52	22	91	49	42	66	24	44	15	5	17	42	34
ENSG00000231105.2	chr1;chr1;chr1;chr1;chr1;chr1	21293290;21293658;21293934;21293934;21298027;21298313	21293743;21293743;21294210;21294210;21299774;21299874	+;+;+;+;+;+	2579	73	0	29	20	14	125	142	98	107	30	87	135	24	78	144	57	65	227	76	97	117	79	130	33	35	6	117	159	71	96	130	144	71	142	44	88	90	46	51	20	44	53	175	27
ENSG00000236216.5	chr1	21397987	21398362	+	376	3	0	5	0	2	0	0	4	3	0	2	11	0	1	1	0	1	11	0	1	18	4	18	0	0	0	3	0	3	1	0	4	4	0	0	1	10	4	0	0	2	5	1	5
ENSG00000228823.1	chr1;chr1	21411460;21413175	21411989;21413293	-;-	649	0	0	0	0	0	0	0	72	0	0	0	0	0	0	0	10	15	0	0	0	64	0	97	0	0	0	5	0	50	0	0	0	0	0	9	0	40	0	0	0	0	0	0	0
ENSG00000236009.1	chr1;chr1;chr1;chr1;chr1;chr1	21415898;21416322;21416326;21416972;21417218;21417218	21415935;21416619;21416619;21417121;21417492;21417374	+;+;+;+;+;+	761	0	0	0	0	0	0	0	36	0	0	0	0	0	0	0	15	6	0	0	0	31	0	23	1	0	0	0	0	0	0	0	0	16	0	2	0	13	0	0	0	0	0	0	0
ENSG00000227001.3	chr1;chr1;chr1;chr1;chr1	21424625;21425471;21426239;21427025;21427787	21424828;21425522;21426410;21427076;21427967	-;-;-;-;-	661	14	6	4	9	1	13	26	39	3	0	25	3	0	14	10	0	13	0	6	0	38	23	37	0	5	2	8	24	26	10	9	5	11	2	1	9	20	0	20	0	46	21	28	3
ENSG00000187952.9	chr1	21428303	21429536	+	1234	52	9	34	14	168	94	74	17	29	74	240	31	39	130	79	23	28	13	49	35	57	71	46	33	22	42	68	132	75	31	106	47	62	40	18	107	27	44	58	62	15	18	170	94
ENSG00000186543.7	chr1;chr1;chr1;chr1;chr1	21434318;21435296;21436067;21436571;21437396	21434540;21435398;21436148;21436829;21437558	+;+;+;+;+	830	0	0	0	0	1	1	0	23	0	0	2	0	0	3	1	13	15	1	0	0	42	0	52	0	0	0	4	0	3	0	0	0	1	1	2	0	6	0	3	5	0	0	4	0
ENSG00000142794.19	chr1;chr1;chr1;chr1;chr1;chr1;chr1;chr1;chr1;chr1;chr1;chr1;chr1;chr1;chr1;chr1;chr1;chr1;chr1;chr1;chr1;chr1;chr1;chr1;chr1;chr1;chr1;chr1;chr1;chr1;chr1;chr1;chr1;chr1;chr1;chr1;chr1;chr1;chr1;chr1;chr1;chr1;chr1;chr1;chr1;chr1;chr1;chr1;chr1;chr1;chr1;chr1;chr1;chr1;chr1;chr1;chr1;chr1;chr1;chr1;chr1;chr1;chr1;chr1;chr1;chr1;chr1;chr1;chr1;chr1;chr1;chr1;chr1;chr1;chr1;chr1;chr1;chr1;chr1;chr1…	21440128;21440131;21440137;21440137;21440138;21440146;21440164;21440238;21440797;21442240;21444944;21444948;21444948;21444948;21444948;21444948;21444948;21444948;21444992;21446037;21449791;21449859;21451767;21451767;21453373;21459749;21466087;21466087;21466996;21467182;21468155;21468441;21468441;21468441;21468550;21468688;21468688;21468688;21468688;21468688;21468688;21470632;21470632;21470632;214…	21440348;21440378;21440348;21440348;21440348;21440348;21440348;21440348;21440914;21442358;21445219;21445219;21445219;21445219;21445219;21445219;21445219;21445219;21445219;21446482;21449888;21449888;21451858;21451909;21454306;21460000;21466156;21466156;21467309;21467309;21468334;21468585;21468585;21468585;21468585;21468897;21468897;21468894;21468897;21468897;21468897;21470734;21470734;21470734;214…	+;+;+;+;+;+;+;+;+;+;+;+;+;+;+;+;+;+;+;+;+;+;+;+;+;+;+;+;+;+;+;+;+;+;+;+;+;+;+;+;+;+;+;+;+;+;+;+;+;+;+;+;+;+;+;+;+;+;+;+;+;+;+;+;+;+;+;+;+;+;+;+;+;+;+;+;+;+;+;+;+;+;+;+;+;+;+;+;+;+;+;+;+;+;+;+;+;+;+;+;+;+;+;+;+;+;+;+;+;+;+;+;+;+;+;+;+;+;+;+;+;+;+;+;+;+;+	6812	391	63	51	193	283	398	297	368	282	148	508	308	60	403	354	212	243	191	185	138	335	282	435	102	265	188	251	239	225	192	453	226	350	238	270	359	333	158	121	343	254	260	412	239
ENSG00000176378.8	chr1	21459756	21460082	-	327	0	0	0	0	0	0	0	0	0	0	0	0	0	0	0	0	0	0	16	0	0	0	0	1	0	1	0	0	0	0	0	6	0	0	0	0	0	0	0	0	0	0	0	0
ENSG00000162551.14	chr1;chr1;chr1;chr1;chr1;chr1;chr1;chr1;chr1;chr1;chr1;chr1;chr1;chr1;chr1;chr1;chr1;chr1;chr1;chr1;chr1;chr1;chr1;chr1;chr1;chr1;chr1;chr1;chr1;chr1;chr1;chr1;chr1;chr1;chr1;chr1;chr1;chr1;chr1;chr1;chr1;chr1;chr1;chr1;chr1;chr1;chr1;chr1;chr1;chr1;chr1;chr1;chr1;chr1;chr1;chr1;chr1;chr1	21509397;21509423;21509426;21509428;21551279;21553978;21553978;21560626;21560626;21560626;21560626;21560626;21561097;21561097;21561097;21561097;21563110;21563110;21563110;21563110;21563110;21564041;21564041;21564041;21564041;21564041;21568104;21568104;21568104;21568104;21570303;21570305;21570305;21570305;21570305;21573665;21573665;21573665;21573665;21574478;21575733;21575733;21575733;21575733;215…	21509517;21509517;21509517;21509517;21551428;21554142;21554142;21560745;21560745;21560745;21560745;21560745;21561212;21561212;21561212;21561212;21563284;21563284;21563284;21563284;21563284;21564216;21564216;21564216;21564216;21564211;21568247;21568247;21568247;21568247;21570374;21570374;21570374;21570374;21570374;21573799;21573799;21573799;21573799;21574743;21575924;21575924;21575924;21575924;215…	+;+;+;+;+;+;+;+;+;+;+;+;+;+;+;+;+;+;+;+;+;+;+;+;+;+;+;+;+;+;+;+;+;+;+;+;+;+;+;+;+;+;+;+;+;+;+;+;+;+;+;+;+;+;+;+;+;+	2980	90	69	32	20	13	133	185	133	18	50	34	79	19	73	151	188	171	69	81	70	225	94	241	55	244	195	67	26	60	197	466	282	131	269	74	1034	401	53	24	45	170	84	123	37
ENSG00000233431.1	chr1;chr1	21586472;21590985	21587089;21591187	+;+	821	0	0	0	0	0	0	0	22	0	0	0	0	0	0	0	0	28	0	2	0	25	1	58	1	0	12	3	0	1	0	0	1	0	0	0	0	37	0	0	1	0	1	0	0
ENSG00000076864.19	chr1;chr1;chr1;chr1;chr1;chr1;chr1;chr1;chr1;chr1;chr1;chr1;chr1;chr1;chr1;chr1;chr1;chr1;chr1;chr1;chr1;chr1;chr1;chr1;chr1;chr1;chr1;chr1;chr1;chr1;chr1;chr1;chr1;chr1;chr1;chr1;chr1;chr1;chr1;chr1;chr1;chr1;chr1;chr1;chr1;chr1;chr1;chr1;chr1;chr1;chr1;chr1;chr1;chr1;chr1;chr1;chr1;chr1;chr1;chr1;chr1;chr1;chr1;chr1;chr1;chr1;chr1;chr1;chr1;chr1;chr1;chr1;chr1;chr1;chr1;chr1;chr1;chr1;chr1;chr1…	21596215;21596221;21596221;21596221;21596221;21596222;21596222;21597008;21597686;21597686;21597686;21597686;21597686;21597686;21597686;21597686;21597961;21597961;21597961;21597961;21597961;21597961;21597961;21597961;21598400;21598400;21598400;21598400;21598400;21598400;21598400;21598400;21599494;21599494;21599494;21599494;21599494;21599494;21599494;21599494;21599581;21601684;21601684;21601684;216…	21597264;21597264;21597264;21597264;21597264;21597264;21597264;21597264;21597728;21597728;21597728;21597728;21597728;21597728;21597728;21597728;21598064;21598040;21598095;21598064;21598095;21598064;21598064;21598064;21598502;21598502;21598502;21598502;21598449;21598502;21598502;21598502;21599617;21599617;21599617;21599617;21599617;21599617;21599617;21599575;21599617;21601797;21601797;21601797;216…	-;-;-;-;-;-;-;-;-;-;-;-;-;-;-;-;-;-;-;-;-;-;-;-;-;-;-;-;-;-;-;-;-;-;-;-;-;-;-;-;-;-;-;-;-;-;-;-;-;-;-;-;-;-;-;-;-;-;-;-;-;-;-;-;-;-;-;-;-;-;-;-;-;-;-;-;-;-;-;-;-;-;-;-;-;-;-;-;-;-;-;-;-;-;-;-;-;-;-;-;-;-;-;-;-;-;-;-;-;-;-;-;-;-;-;-;-;-;-;-;-;-;-;-;-;-;-;-;-;-;-;-;-;-;-;-;-;-;-;-;-;-;-;-;-;-;-;-;-;-;-;-;-;-;-;-;-;-;-;-;-;-;-;-;-;-;-;-;-;-;-;-;-;-;-;-;-;-;-;-;-;-;-;-;-;-;-;-;-;-;-;-;-;-;-;-;-;-;-;-…	5755	352	113	118	55	879	849	366	380	869	159	1950	455	154	800	1443	357	209	329	1734	108	469	182	565	131	340	381	300	156	3785	263	585	87	288	377	213	236	500	245	153	1302	227	297	415	1404
ENSG00000090686.16	chr1;chr1;chr1;chr1;chr1;chr1;chr1;chr1;chr1;chr1;chr1;chr1;chr1;chr1;chr1;chr1;chr1;chr1;chr1;chr1;chr1;chr1;chr1;chr1;chr1;chr1;chr1;chr1;chr1;chr1;chr1;chr1;chr1;chr1;chr1;chr1;chr1;chr1;chr1;chr1;chr1;chr1;chr1;chr1;chr1;chr1;chr1;chr1;chr1;chr1;chr1;chr1;chr1;chr1;chr1;chr1;chr1;chr1;chr1;chr1;chr1;chr1;chr1;chr1;chr1;chr1;chr1;chr1;chr1;chr1;chr1;chr1;chr1;chr1;chr1;chr1;chr1;chr1;chr1;chr1…	21678298;21678298;21678903;21679199;21679367;21680808;21680808;21680808;21680808;21680808;21685892;21687191;21687191;21687191;21687191;21689974;21689974;21689974;21689974;21689974;21695066;21695066;21695066;21701498;21701498;21701498;21701498;21701498;21703512;21703512;21703512;21703512;21704262;21704262;21704262;21704262;21704262;21705727;21705727;21705727;21705727;21706126;21706126;21706126;217…	21679439;21679439;21679439;21679439;21679439;21680834;21681252;21680834;21680834;21680834;21687239;21687239;21687239;21687239;21687239;21690099;21690099;21690099;21690099;21690099;21695221;21695221;21695221;21701602;21701602;21701602;21701602;21701602;21703618;21703618;21703618;21703618;21704615;21704392;21704392;21704392;21704392;21705837;21705837;21705837;21705837;21706187;21706187;21706187;217…	-;-;-;-;-;-;-;-;-;-;-;-;-;-;-;-;-;-;-;-;-;-;-;-;-;-;-;-;-;-;-;-;-;-;-;-;-;-;-;-;-;-;-;-;-;-;-;-;-;-;-;-;-;-;-;-;-;-;-;-;-;-;-;-;-;-;-;-;-;-;-;-;-;-;-;-;-;-;-;-;-;-;-;-;-;-;-;-;-;-;-;-;-;-;-;-;-;-;-;-;-;-;-;-;-;-;-;-;-;-;-;-;-;-;-;-;-;-;-;-;-;-;-;-;-;-;-;-;-;-;-;-;-;-;-;-;-;-;-;-;-;-;-	9497	1091	787	284	822	1535	2202	2055	501	1600	662	1257	965	195	1321	1446	588	427	1316	1447	1793	793	1022	372	249	2393	1076	915	1257	1087	1161	1001	1157	1662	1188	712	1430	491	520	562	1578	1099	1228	1388	744
ENSG00000231978.2	chr1	21768269	21768575	+	307	34	0	5	10	3	31	18	9	23	4	1	15	0	8	18	0	8	0	5	3	5	2	10	0	35	1	5	8	8	15	1	3	1	1	10	0	0	8	0	24	3	37	1	2
ENSG00000187942.12	chr1;chr1;chr1;chr1;chr1;chr1;chr1;chr1;chr1;chr1;chr1;chr1;chr1	21812265;21812363;21814398;21814398;21815943;21815943;21821450;21821450;21821497;21821724;21822202;21822202;21823910	21812536;21812536;21814823;21814823;21816074;21816074;21821611;21821611;21821611;21822548;21825225;21822433;21823963	+;+;+;+;+;+;+;+;+;+;+;+;+	4494	24	1	14	7	19	5	59	80	60	243	28	38	24	57	29	156	38	54	78	43	123	24	220	22	11	16	140	48	37	119	30	94	85	39	58	77	99	97	59	13	34	3	65	17
ENSG00000142798.20	chr1;chr1;chr1;chr1;chr1;chr1;chr1;chr1;chr1;chr1;chr1;chr1;chr1;chr1;chr1;chr1;chr1;chr1;chr1;chr1;chr1;chr1;chr1;chr1;chr1;chr1;chr1;chr1;chr1;chr1;chr1;chr1;chr1;chr1;chr1;chr1;chr1;chr1;chr1;chr1;chr1;chr1;chr1;chr1;chr1;chr1;chr1;chr1;chr1;chr1;chr1;chr1;chr1;chr1;chr1;chr1;chr1;chr1;chr1;chr1;chr1;chr1;chr1;chr1;chr1;chr1;chr1;chr1;chr1;chr1;chr1;chr1;chr1;chr1;chr1;chr1;chr1;chr1;chr1;chr1…	21822244;21822245;21823301;21823616;21823616;21823616;21824121;21824121;21824306;21824306;21824537;21824537;21824704;21824704;21827863;21827863;21828030;21828030;21828255;21828255;21828835;21828835;21829383;21829383;21829993;21829993;21830982;21830982;21831215;21831215;21831463;21831463;21831652;21831652;21832495;21832495;21832875;21833116;21833268;21833268;21833467;21833467;21833467;21833816;218…	21823488;21823488;21823488;21823719;21824266;21823719;21824204;21824204;21824376;21824376;21824615;21824615;21824779;21824779;21827919;21827919;21828152;21828152;21828426;21828426;21829079;21829079;21830713;21829604;21830091;21830091;21831090;21831090;21831324;21831324;21831562;21831562;21831796;21831796;21832606;21832606;21832892;21833384;21833384;21833384;21833614;21833577;21833614;21833925;218…	-;-;-;-;-;-;-;-;-;-;-;-;-;-;-;-;-;-;-;-;-;-;-;-;-;-;-;-;-;-;-;-;-;-;-;-;-;-;-;-;-;-;-;-;-;-;-;-;-;-;-;-;-;-;-;-;-;-;-;-;-;-;-;-;-;-;-;-;-;-;-;-;-;-;-;-;-;-;-;-;-;-;-;-;-;-;-;-;-;-;-;-;-;-;-;-;-;-;-;-;-;-;-;-;-;-;-;-;-;-;-;-;-;-;-;-;-;-;-;-;-;-;-;-;-;-;-;-;-;-;-;-;-;-;-;-;-;-;-;-;-;-;-;-;-;-;-;-;-;-;-;-;-;-;-;-;-;-;-;-;-;-;-;-;-;-;-;-;-;-	18118	5292	2440	1499	2498	4069	5505	10347	2529	5228	11617	5106	5070	2713	6559	3396	8143	1766	4228	3517	5403	4100	5487	1914	3185	4074	11038	12110	6936	3916	7745	4541	12561	10931	9054	3018	5624	2699	9047	8339	4097	5870	3123	7214	3762
ENSG00000232037.3	chr1	21908098	21908580	+	483	3	8	4	11	35	11	19	6	16	3	6	7	5	9	19	23	2	5	26	6	29	12	13	4	20	8	6	13	4	31	8	19	7	10	23	2	10	18	18	11	46	15	13	3
ENSG00000283234.1	chr1;chr1;chr1	21950679;21950735;21956682	21951650;21951578;21956871	-;-;-	1162	4	13	0	0	4	0	0	38	0	0	1	2	0	0	0	6	10	0	0	0	40	0	88	7	0	0	3	0	1	1	27	0	0	26	0	0	35	0	0	0	0	0	0	0
ENSG00000219073.8	chr1;chr1;chr1;chr1;chr1;chr1;chr1;chr1;chr1;chr1;chr1;chr1;chr1;chr1;chr1;chr1;chr1;chr1;chr1;chr1;chr1;chr1	21977022;21977893;21978369;21978369;21980824;21980824;21981038;21981038;21981102;21983694;21983694;21983694;21984189;21984189;21984266;21986531;21986531;21986531;21986964;21989262;21989262;21998151	21977082;21977986;21978454;21978454;21980921;21980921;21981172;21981172;21981172;21983777;21983830;21983830;21984331;21984331;21984331;21986683;21986683;21986683;21987011;21989354;21989354;21998642	+;+;+;+;+;+;+;+;+;+;+;+;+;+;+;+;+;+;+;+;+;+	1540	0	0	0	0	0	0	0	70	0	0	2	0	0	0	0	19	38	0	0	0	84	1	57	0	0	0	1	0	5	0	0	0	0	0	7	0	13	0	0	0	0	0	9	5
ENSG00000285959.1	chr1;chr1;chr1;chr1;chr1;chr1;chr1;chr1;chr1;chr1;chr1;chr1;chr1	21983606;21984189;21986531;22005305;22005447;22005662;22007373;22009705;22009705;22025292;22025292;22030280;22030280	21983830;21984331;21986683;22005544;22005544;22005796;22007515;22009857;22009857;22025372;22025372;22030617;22030617	+;+;+;+;+;+;+;+;+;+;+;+;+	1611	0	0	0	0	0	0	0	0	0	0	0	0	0	0	0	0	0	0	0	0	0	0	3	0	0	0	0	0	0	0	0	0	0	0	0	0	3	0	0	0	0	0	0	0
ENSG00000273610.1	chr1	21987481	21987777	+	297	0	0	0	0	0	0	0	7	0	0	0	0	0	0	0	23	1	0	0	0	1	0	2	0	0	0	0	0	0	0	0	0	0	0	0	0	5	0	0	0	0	0	0	0
ENSG00000201919.1	chr1	21987816	21987919	+	104	0	0	0	0	0	0	0	0	0	0	0	0	0	0	0	0	0	0	0	0	0	0	4	0	0	0	0	0	0	0	0	0	0	0	0	0	0	0	0	0	0	0	0	0
ENSG00000142789.20	chr1;chr1;chr1;chr1;chr1;chr1;chr1;chr1;chr1;chr1;chr1;chr1;chr1;chr1;chr1;chr1	22001657;22001660;22003003;22003003;22005447;22005447;22005662;22005662;22006878;22007373;22007450;22009705;22009705;22010138;22012450;22012450	22001717;22001717;22003088;22003088;22005544;22005544;22006068;22005796;22007014;22007515;22007515;22009857;22009857;22010185;22012539;22012542	+;+;+;+;+;+;+;+;+;+;+;+;+;+;+;+	1226	0	0	0	0	0	0	0	25	0	0	0	0	0	0	0	9	20	0	0	0	58	0	26	2	69	0	7	0	1	0	0	17	0	0	2	0	30	0	0	0	0	0	0	0
ENSG00000278124.1	chr1	22010650	22010946	+	297	0	0	0	0	0	0	0	2	0	0	0	0	0	0	0	0	1	0	0	0	0	0	6	0	0	0	0	0	0	0	0	0	0	0	0	0	4	0	0	0	0	0	0	0
ENSG00000201273.1	chr1	22010985	22011088	+	104	0	0	0	0	0	0	0	0	0	0	0	0	0	0	0	0	0	0	0	0	0	0	0	0	0	0	0	0	0	0	0	0	0	0	0	0	0	0	0	0	0	0	0	0
ENSG00000228397.3	chr1;chr1;chr1;chr1;chr1;chr1;chr1;chr1;chr1;chr1;chr1;chr1;chr1;chr1	22023990;22023990;22023993;22023994;22023994;22023994;22024806;22024806;22024806;22024806;22025060;22025060;22025060;22025964	22024445;22024445;22025462;22024445;22024445;22024445;22024966;22025483;22024966;22024955;22025477;22025481;22025492;22026048	-;-;-;-;-;-;-;-;-;-;-;-;-;-	1588	0	6	0	0	4	12	0	39	0	0	0	0	0	1	0	11	19	0	0	0	36	0	58	0	0	0	9	0	9	0	0	0	0	0	0	0	12	0	0	0	0	0	0	0
ENSG00000218510.8	chr1;chr1;chr1;chr1;chr1;chr1;chr1;chr1;chr1;chr1;chr1;chr1;chr1;chr1;chr1;chr1;chr1;chr1;chr1;chr1;chr1;chr1;chr1;chr1;chr1;chr1;chr1;chr1;chr1;chr1;chr1;chr1;chr1;chr1;chr1	22024558;22025188;22025292;22025493;22025498;22025511;22025511;22025511;22025511;22025522;22025532;22025538;22025553;22027414;22027414;22027414;22027414;22027414;22027682;22028528;22030280;22030280;22030280;22030280;22030280;22030280;22030280;22030280;22030280;22030280;22030280;22030280;22030656;22030694;22030947	22024936;22025372;22025372;22025945;22025945;22025639;22025643;22026119;22025639;22025643;22025643;22026649;22025639;22028379;22027534;22027534;22027534;22027534;22027780;22028660;22030617;22031223;22030374;22030617;22030800;22030617;22031223;22031223;22030617;22031219;22031223;22031023;22030691;22030942;22031126	+;+;+;+;+;+;+;+;+;+;+;+;+;+;+;+;+;+;+;+;+;+;+;+;+;+;+;+;+;+;+;+;+;+;+	3764	133	34	26	93	127	104	95	160	73	11	72	83	5	210	273	102	151	121	87	119	86	57	131	11	158	61	36	78	183	93	79	31	110	106	138	46	84	46	45	206	37	106	313	75
ENSG00000070831.17	chr1;chr1;chr1;chr1;chr1;chr1;chr1;chr1;chr1;chr1;chr1;chr1;chr1;chr1;chr1;chr1;chr1;chr1;chr1;chr1;chr1;chr1;chr1;chr1;chr1;chr1;chr1;chr1;chr1;chr1;chr1;chr1;chr1;chr1;chr1;chr1;chr1;chr1;chr1;chr1;chr1;chr1;chr1;chr1;chr1;chr1;chr1;chr1;chr1;chr1;chr1;chr1;chr1;chr1;chr1;chr1;chr1;chr1;chr1;chr1;chr1;chr1;chr1;chr1;chr1;chr1;chr1	22025511;22052627;22052668;22052707;22052709;22052709;22052710;22052712;22052717;22053297;22053486;22055674;22069221;22074094;22078429;22078429;22078429;22078429;22078429;22078429;22078429;22078429;22078429;22078429;22078429;22078706;22078747;22081722;22081722;22081722;22081722;22081722;22081722;22081722;22081722;22081722;22081722;22081722;22086439;22086439;22086439;22086439;22086439;22086439;220…	22025639;22052868;22052742;22052742;22052742;22052742;22052742;22052742;22052742;22053433;22054316;22055802;22069318;22074219;22078583;22078583;22078583;22078583;22078583;22078583;22078583;22078583;22078583;22078583;22078583;22078881;22078881;22081794;22081794;22081794;22081794;22081794;22081794;22081794;22081794;22081794;22081794;22081794;22086548;22086548;22086548;22086548;22086548;22086548;220…	+;+;+;+;+;+;+;+;+;+;+;+;+;+;+;+;+;+;+;+;+;+;+;+;+;+;+;+;+;+;+;+;+;+;+;+;+;+;+;+;+;+;+;+;+;+;+;+;+;+;+;+;+;+;+;+;+;+;+;+;+;+;+;+;+;+;+	16278	1392	1535	609	1074	2359	3131	2150	701	1349	891	2070	2099	272	2039	2697	907	629	2608	1657	1331	1056	1186	517	436	3568	1173	1051	1443	1494	1604	1462	1507	2168	1673	1040	1347	682	1066	1028	2794	1556	1558	1449	1308
ENSG00000285752.1	chr1;chr1;chr1	22028317;22029801;22052787	22028682;22031867;22052927	-;-;-	2574	16	29	3	38	52	65	40	66	14	9	26	6	36	87	37	88	87	29	41	14	114	25	98	9	20	13	8	58	82	21	46	6	106	28	65	6	66	3	12	37	52	20	66	33
ENSG00000285794.1	chr1	22030527	22030748	+	222	0	0	0	0	0	0	0	0	0	0	0	0	0	0	0	0	0	0	0	0	0	0	0	0	0	0	0	0	0	0	0	0	0	0	0	0	0	0	0	0	0	0	0	0
ENSG00000230068.2	chr1;chr1	22059197;22063998	22059686;22064199	+;+	692	22	19	6	25	19	26	13	14	13	7	18	11	5	46	27	21	18	21	8	53	25	10	19	2	4	5	7	15	75	69	1	46	36	20	25	3	17	13	12	32	19	14	4	14
ENSG00000271428.1	chr1	22068340	22068827	-	488	0	17	17	8	24	36	32	11	33	8	27	78	3	43	6	3	8	42	1	1	32	18	13	4	112	3	16	21	9	22	0	28	57	15	14	17	14	2	3	4	13	19	19	9
ENSG00000162552.15	chr1;chr1;chr1;chr1;chr1;chr1;chr1;chr1;chr1;chr1	22117313;22121211;22121445;22127038;22127474;22129616;22129616;22129616;22142846;22143732	22120517;22121353;22121576;22127481;22127481;22129851;22129851;22129851;22143097;22143969	-;-;-;-;-;-;-;-;-;-	4650	84	48	24	68	52	72	77	158	10	95	88	154	5	20	130	97	99	101	56	82	295	183	279	17	115	154	167	42	89	74	121	19	53	63	55	64	187	133	58	260	67	177	87	41
ENSG00000285873.1	chr1;chr1;chr1;chr1;chr1	22142850;22154903;22155797;22156437;22156976	22142904;22155024;22155903;22156537;22157401	+;+;+;+;+	811	15	2	0	0	8	2	16	46	0	0	3	21	2	5	60	13	31	5	2	4	104	6	97	2	14	46	40	0	14	0	18	0	2	9	7	6	55	1	21	47	1	30	3	0
ENSG00000266564.1	chr1	22266239	22266300	+	62	0	0	1	0	0	0	0	0	0	0	0	0	0	0	0	0	0	0	0	0	3	0	1	3	0	0	0	0	0	0	0	0	0	0	0	0	2	0	0	18	0	0	0	0
ENSG00000234397.3	chr1	22322840	22323331	-	492	0	0	2	0	0	0	0	2	0	0	0	0	0	0	0	0	0	0	0	0	10	0	6	0	0	0	4	0	19	0	3	0	1	0	0	0	9	0	2	8	0	0	0	0
ENSG00000279625.1	chr1	22364630	22366482	-	1853	0	0	0	0	0	0	0	40	0	0	0	0	0	0	0	32	21	0	0	0	38	0	38	0	0	0	3	0	17	0	0	0	0	0	7	0	20	2	0	0	0	0	0	0
ENSG00000184677.18	chr1;chr1;chr1;chr1;chr1;chr1;chr1;chr1;chr1;chr1;chr1;chr1;chr1;chr1;chr1;chr1;chr1;chr1;chr1;chr1;chr1;chr1;chr1;chr1;chr1;chr1;chr1;chr1;chr1;chr1;chr1;chr1;chr1;chr1;chr1;chr1;chr1;chr1;chr1;chr1;chr1;chr1;chr1;chr1;chr1;chr1;chr1;chr1;chr1;chr1;chr1;chr1;chr1;chr1;chr1;chr1;chr1;chr1;chr1;chr1;chr1;chr1;chr1;chr1;chr1;chr1;chr1;chr1;chr1	22428838;22451851;22451851;22451851;22451867;22452659;22452659;22489880;22489880;22489880;22489880;22489880;22491400;22491400;22491400;22491400;22491400;22501492;22501492;22501492;22502299;22502299;22502299;22506049;22506049;22506049;22506049;22506049;22508001;22508001;22508001;22508001;22508530;22508530;22508530;22508530;22509100;22509100;22509100;22509100;22511179;22511179;22511179;22511179;225…	22429014;22452004;22452004;22452004;22452004;22452946;22452946;22490645;22490645;22490645;22490645;22490645;22491533;22491533;22491533;22491533;22491533;22501684;22501684;22501684;22502441;22502441;22502441;22506241;22506241;22506241;22506241;22506241;22508137;22508137;22508137;22508137;22508731;22508731;22508731;22508731;22509233;22509233;22509233;22509233;22511347;22511347;22511347;22511347;225…	+;+;+;+;+;+;+;+;+;+;+;+;+;+;+;+;+;+;+;+;+;+;+;+;+;+;+;+;+;+;+;+;+;+;+;+;+;+;+;+;+;+;+;+;+;+;+;+;+;+;+;+;+;+;+;+;+;+;+;+;+;+;+;+;+;+;+;+;+	9169	1019	500	447	923	1379	1490	1085	790	1059	321	1590	941	304	1220	903	775	414	935	848	1057	1123	939	675	233	850	763	833	1125	940	1179	936	967	1293	1378	510	587	624	779	712	1058	858	1127	1358	759
ENSG00000237200.1	chr1;chr1	22517474;22519606	22517643;22519708	+;+	273	5	2	18	17	0	22	27	12	18	13	29	6	0	6	25	3	15	0	25	3	10	17	30	1	31	7	18	13	8	39	11	52	69	65	28	8	3	2	6	9	6	6	24	16
ENSG00000070886.12	chr1;chr1;chr1;chr1;chr1;chr1;chr1;chr1;chr1;chr1;chr1;chr1;chr1;chr1;chr1;chr1;chr1;chr1;chr1;chr1;chr1;chr1	22563489;22563564;22569289;22569289;22576217;22576217;22586480;22586480;22588871;22588871;22593326;22593524;22595230;22596106;22597312;22597676;22598151;22598838;22600661;22600898;22601300;22601627	22563729;22563729;22569353;22569353;22576880;22576880;22586635;22586635;22589621;22589206;22593450;22593686;22595323;22596173;22597476;22597861;22598212;22599047;22600810;22601088;22601473;22603595	+;+;+;+;+;+;+;+;+;+;+;+;+;+;+;+;+;+;+;+;+;+	5434	0	0	0	0	0	4	0	115	0	0	27	21	0	3	0	56	108	0	0	0	204	0	336	2	0	1	65	1	24	0	47	1	0	0	11	0	201	6	2	502	0	15	10	2
ENSG00000276835.2	chr1	22633258	22633366	-	109	0	0	0	0	0	0	0	5	0	0	0	0	18	0	0	5	0	0	0	0	0	0	10	0	0	0	1	0	0	0	0	0	0	0	0	0	7	0	0	0	0	0	0	0
ENSG00000173372.17	chr1;chr1;chr1;chr1;chr1;chr1;chr1;chr1	22636628;22636762;22637580;22637610;22637610;22638833;22638833;22638833	22636702;22636860;22637779;22637779;22637779;22639331;22639678;22639608	+;+;+;+;+;+;+;+	1220	261	156	85	391	896	1705	557	136	177	281	647	258	104	88	315	231	65	383	306	857	341	239	112	122	947	246	243	473	92	143	854	796	737	691	137	355	213	401	205	1024	857	615	123	721
ENSG00000159189.12	chr1;chr1;chr1;chr1;chr1;chr1;chr1;chr1;chr1	22643633;22643633;22643653;22644011;22644011;22644011;22647227;22647227;22647227	22643737;22643714;22643886;22644204;22644204;22644204;22648108;22648110;22647887	+;+;+;+;+;+;+;+;+	1332	496	319	196	869	1327	2394	674	174	232	282	1105	415	140	261	714	476	83	651	468	1170	354	436	126	241	1300	527	273	608	223	256	1372	958	1161	1037	221	364	485	558	339	1400	1155	980	236	1037
ENSG00000173369.17	chr1;chr1;chr1;chr1;chr1;chr1;chr1;chr1;chr1;chr1	22652762;22653189;22653236;22654008;22659440;22659440;22659440;22660812;22660812;22660812	22652955;22653303;22653303;22654160;22659643;22659643;22659643;22661637;22661316;22661090	+;+;+;+;+;+;+;+;+;+	1492	553	445	131	918	1453	3560	883	193	167	272	1155	548	119	383	442	437	79	648	626	1582	410	341	85	287	1331	406	267	676	213	230	1166	1014	1334	1079	247	443	429	618	353	1434	1065	1314	220	1195
ENSG00000133216.17	chr1;chr1;chr1;chr1;chr1;chr1;chr1;chr1;chr1;chr1;chr1;chr1;chr1;chr1;chr1;chr1;chr1;chr1;chr1;chr1;chr1;chr1;chr1;chr1;chr1;chr1;chr1;chr1;chr1;chr1;chr1;chr1;chr1;chr1;chr1;chr1;chr1;chr1;chr1;chr1;chr1;chr1;chr1;chr1;chr1;chr1;chr1;chr1;chr1;chr1;chr1;chr1;chr1;chr1;chr1;chr1;chr1;chr1;chr1;chr1;chr1;chr1;chr1;chr1;chr1;chr1;chr1;chr1;chr1;chr1;chr1;chr1;chr1;chr1;chr1;chr1;chr1;chr1;chr1;chr1	22710839;22710839;22710965;22710970;22775178;22781421;22781421;22781421;22781421;22781421;22784392;22784392;22784392;22784392;22784392;22800240;22863037;22863037;22863037;22863037;22863037;22863037;22864877;22864877;22864877;22864877;22864877;22864877;22865159;22882359;22882359;22882359;22882359;22882359;22882359;22882359;22891129;22892881;22892884;22892884;22892884;22892884;22895472;22895472;228…	22711043;22711043;22711043;22711043;22775244;22781485;22781485;22781485;22781485;22781485;22785076;22785076;22785076;22785076;22785076;22800291;22863192;22863192;22863192;22863192;22863192;22863192;22865212;22865212;22865212;22865212;22865212;22865212;22865212;22882840;22882483;22882483;22882483;22882483;22882483;22882483;22891265;22893046;22893046;22893046;22893046;22893046;22895580;22895580;228…	+;+;+;+;+;+;+;+;+;+;+;+;+;+;+;+;+;+;+;+;+;+;+;+;+;+;+;+;+;+;+;+;+;+;+;+;+;+;+;+;+;+;+;+;+;+;+;+;+;+;+;+;+;+;+;+;+;+;+;+;+;+;+;+;+;+;+;+;+;+;+;+;+;+;+;+;+;+;+;+	12516	144	207	11	137	525	289	248	416	48	98	78	178	42	55	155	550	369	222	76	160	654	131	746	158	123	94	323	190	159	177	250	188	269	237	86	100	530	191	298	97	125	92	179	148
ENSG00000265422.1	chr1	22719517	22719598	+	82	0	0	0	0	0	0	0	2	2	0	3	0	0	0	0	0	0	0	0	11	6	0	6	0	0	0	0	0	0	0	0	2	0	0	0	1	5	1	0	0	0	0	0	0
ENSG00000225952.1	chr1;chr1	22835713;22836669	22836011;22836849	-;-	480	11	0	0	10	7	2	6	5	0	2	2	0	0	0	23	61	5	0	0	0	25	1	9	1	28	0	0	11	4	0	0	2	2	1	8	0	25	16	2	1	6	13	1	0
ENSG00000264014.1	chr1	22863159	22863226	-	68	0	0	0	0	0	0	0	1	0	0	0	0	0	0	0	0	0	0	0	0	0	0	6	0	0	0	0	0	2	0	0	0	0	0	0	0	2	0	0	0	0	0	1	0
ENSG00000215906.8	chr1;chr1;chr1;chr1;chr1;chr1;chr1;chr1;chr1;chr1;chr1;chr1	22953043;22953049;22955321;22955321;22958685;22958685;22958762;22959942;22959942;22963107;22963107;22965290	22954024;22954024;22955426;22955426;22958920;22958713;22958920;22960099;22960099;22963178;22963216;22965338	-;-;-;-;-;-;-;-;-;-;-;-	1641	0	0	0	0	0	0	0	35	0	0	0	0	0	0	3	7	52	0	0	0	76	0	80	0	0	0	16	0	8	0	0	0	0	0	14	0	78	0	0	0	0	0	1	1
ENSG00000227868.6	chr1;chr1;chr1;chr1;chr1;chr1;chr1	23010834;23010834;23010835;23013883;23013883;23013883;23015772	23011200;23011101;23011101;23014045;23014024;23014094;23015852	-;-;-;-;-;-;-	660	0	0	19	2	0	2	0	29	0	0	0	4	0	0	3	6	10	1	0	0	39	0	28	0	4	0	6	0	5	0	0	0	0	0	0	0	24	0	0	0	0	2	0	3
ENSG00000004487.17	chr1;chr1;chr1;chr1;chr1;chr1;chr1;chr1;chr1;chr1;chr1;chr1;chr1;chr1;chr1;chr1;chr1;chr1;chr1;chr1;chr1;chr1;chr1;chr1;chr1;chr1;chr1;chr1;chr1;chr1;chr1;chr1;chr1;chr1;chr1;chr1;chr1;chr1;chr1;chr1;chr1;chr1;chr1;chr1;chr1;chr1;chr1;chr1;chr1;chr1;chr1;chr1;chr1;chr1;chr1;chr1;chr1;chr1;chr1;chr1;chr1;chr1;chr1;chr1;chr1;chr1;chr1;chr1;chr1	23019443;23019448;23019468;23030469;23030469;23030469;23044427;23050387;23050387;23050387;23050425;23053761;23053761;23053761;23053761;23055069;23055069;23055069;23055069;23055932;23055932;23055932;23057484;23057484;23057484;23059073;23059073;23059073;23066060;23068539;23068539;23068539;23069061;23069061;23069061;23071225;23071225;23071225;23072124;23072124;23072124;23073274;23073292;23073292;230…	23019947;23019947;23019947;23030634;23030634;23030634;23044486;23050520;23050520;23050520;23050520;23053839;23053839;23053839;23053839;23055418;23055161;23055161;23055161;23056038;23056038;23056038;23057565;23057565;23057565;23059167;23059167;23059167;23066071;23068681;23068681;23068681;23069151;23069151;23069151;23071359;23071359;23071359;23072197;23072197;23072197;23073403;23073403;23073403;230…	+;+;+;+;+;+;+;+;+;+;+;+;+;+;+;+;+;+;+;+;+;+;+;+;+;+;+;+;+;+;+;+;+;+;+;+;+;+;+;+;+;+;+;+;+;+;+;+;+;+;+;+;+;+;+;+;+;+;+;+;+;+;+;+;+;+;+;+;+	5440	853	1012	338	599	1326	1587	1206	399	800	777	1222	1151	146	1490	921	388	209	726	1251	771	617	993	305	220	3436	807	852	586	618	753	1031	1006	1154	927	512	549	354	613	508	1024	653	763	984	767
ENSG00000240553.1	chr1;chr1	23020147;23087798	23020551;23088058	-;-	666	6	13	0	7	37	12	9	21	11	0	15	57	1	51	25	20	22	6	2	5	39	1	19	1	23	5	48	1	13	0	21	4	15	11	15	2	21	8	10	20	26	2	7	1
ENSG00000263793.1	chr1	23044305	23044372	+	68	0	0	2	0	0	1	1	0	0	0	0	0	0	0	0	0	5	0	0	0	1	0	0	0	0	0	0	0	0	0	2	0	0	1	0	0	0	0	0	24	0	0	0	0
ENSG00000266802.1	chr1	23057858	23057934	-	77	19	1	0	4	19	7	4	3	3	0	16	0	0	28	8	8	0	3	1	0	1	7	4	4	13	10	9	3	1	1	2	3	5	3	2	0	7	0	10	0	3	4	3	5
ENSG00000169641.13	chr1;chr1;chr1;chr1;chr1;chr1;chr1;chr1;chr1;chr1;chr1;chr1;chr1;chr1;chr1;chr1;chr1;chr1;chr1;chr1	23084023;23084030;23090427;23091190;23091190;23091190;23093443;23094155;23109022;23109022;23109022;23109022;23109585;23109585;23133465;23168766;23168766;23168766;23168766;23177491	23089053;23089053;23090898;23094380;23094380;23094380;23094380;23094380;23109127;23109127;23109127;23109127;23109650;23109650;23133679;23168845;23168817;23169024;23168858;23177808	-;-;-;-;-;-;-;-;-;-;-;-;-;-;-;-;-;-;-;-	9658	871	643	218	474	588	1124	1124	482	693	788	1107	1118	300	641	779	626	528	632	658	746	770	616	511	396	1185	941	1095	997	554	854	641	1089	1615	1057	557	516	478	598	644	727	799	572	888	452
ENSG00000229010.1	chr1	23140325	23141142	+	818	13	0	1	8	20	7	34	20	13	13	11	33	8	12	9	29	25	0	3	18	64	15	46	6	3	4	14	3	9	21	2	19	24	24	5	14	38	3	4	29	2	53	24	3
ENSG00000206935.1	chr1	23162704	23162810	+	107	0	0	0	0	33	0	0	1	0	0	2	18	0	0	3	0	1	0	0	0	0	0	4	0	0	0	0	3	0	3	0	0	0	3	2	0	0	0	0	0	10	0	0	0
ENSG00000252578.1	chr1	23163953	23164053	+	101	0	0	0	0	3	15	7	2	0	0	2	0	0	0	0	0	0	0	9	0	17	18	1	0	0	0	0	5	3	3	0	8	24	0	0	0	5	0	0	0	0	0	0	3
ENSG00000179546.4	chr1	23191895	23194729	-	2835	0	22	5	18	9	12	3	98	0	0	0	4	0	0	15	48	96	0	9	1	82	1	158	2	4	9	1	1	45	0	2	6	2	2	17	1	120	6	0	37	1	18	3	1
ENSG00000215381.3	chr1	23244765	23245224	+	460	0	0	0	0	0	0	0	14	0	0	0	0	2	0	0	0	6	0	0	0	6	0	23	0	0	0	4	0	4	2	0	0	0	1	0	0	11	0	11	0	2	22	2	0
ENSG00000261326.4	chr1;chr1;chr1;chr1;chr1;chr1;chr1;chr1;chr1;chr1;chr1;chr1	23281307;23281308;23281309;23281309;23281332;23283995;23283995;23283995;23283995;23284356;23285110;23285110	23283113;23283113;23283113;23286752;23283113;23287439;23284484;23287488;23285743;23284410;23285454;23286545	-;-;-;-;-;-;-;-;-;-;-;-	6182	677	473	149	360	552	570	351	120	555	357	582	422	136	769	978	256	209	764	430	321	220	351	145	41	879	274	171	469	396	301	400	336	562	327	329	180	160	220	216	813	336	495	415	324
ENSG00000284726.1	chr1;chr1	23297797;23302344	23297877;23302866	+;+	604	82	35	15	88	51	39	43	24	88	131	56	143	11	115	114	3	43	146	47	16	47	44	32	7	124	5	42	88	79	42	110	35	54	88	32	54	36	22	12	82	64	31	73	49
ENSG00000125944.21	chr1;chr1;chr1;chr1;chr1;chr1;chr1;chr1;chr1;chr1;chr1;chr1;chr1;chr1;chr1;chr1;chr1;chr1;chr1;chr1;chr1;chr1;chr1;chr1;chr1;chr1;chr1;chr1;chr1;chr1;chr1;chr1;chr1;chr1;chr1;chr1;chr1;chr1;chr1;chr1;chr1;chr1;chr1;chr1;chr1;chr1;chr1;chr1;chr1;chr1;chr1;chr1;chr1;chr1;chr1;chr1;chr1;chr1;chr1;chr1;chr1;chr1;chr1;chr1;chr1;chr1;chr1;chr1;chr1;chr1;chr1;chr1;chr1;chr1;chr1;chr1;chr1;chr1;chr1;chr1…	23303771;23303963;23304688;23304688;23306412;23306412;23309783;23309784;23309786;23309930;23310333;23310454;23310828;23311201;23311201;23311201;23311201;23311201;23311201;23311201;23311201;23311201;23311662;23313553;23313553;23313553;23313553;23313553;23313553;23313553;23313553;23313553;23313599;23318483;23318483;23318483;23318483;23318483;23318483;23318483;23318483;23318483;23321528;23321528;233…	23304106;23304106;23311066;23311066;23306503;23306632;23311066;23311066;23311066;23311066;23311066;23311066;23311066;23311322;23311322;23311322;23311322;23311322;23311322;23311322;23311322;23311322;23311893;23313702;23313702;23313702;23313702;23313702;23313702;23313702;23313702;23313601;23313702;23318688;23318688;23318688;23318688;23318688;23318688;23318697;23318697;23318688;23321663;23321663;233…	-;-;-;-;-;-;-;-;-;-;-;-;-;-;-;-;-;-;-;-;-;-;-;-;-;-;-;-;-;-;-;-;-;-;-;-;-;-;-;-;-;-;-;-;-;-;-;-;-;-;-;-;-;-;-;-;-;-;-;-;-;-;-;-;-;-;-;-;-;-;-;-;-;-;-;-;-;-;-;-;-;-;-;-;-;-;-;-;-;-;-;-;-;-;-;-;-;-;-;-	8704	1911	2017	982	1423	3382	3714	3275	524	2531	1261	2468	2380	334	3104	3406	945	606	2776	1968	1886	1132	2415	336	686	6482	1498	1543	2284	1831	1829	2412	1760	2856	2105	1228	1030	621	1253	989	2812	1791	1875	1937	2032
ENSG00000125945.15	chr1;chr1;chr1;chr1;chr1;chr1;chr1	23359448;23359975;23367042;23367042;23367973;23367973;23369366	23363221;23363221;23367168;23367168;23368386;23368065;23369836	-;-;-;-;-;-;-	4786	309	322	139	254	679	572	618	222	474	607	1379	481	127	656	341	353	145	397	413	462	384	259	206	104	591	385	452	399	393	706	1585	721	792	718	330	261	229	426	412	457	326	432	965	361
ENSG00000249087.7	chr1;chr1;chr1;chr1;chr1;chr1;chr1;chr1;chr1;chr1;chr1;chr1;chr1;chr1;chr1	23368997;23369199;23369218;23369236;23369238;23369250;23371139;23371139;23371139;23371139;23371139;23371144;23371474;23371513;23371513	23369029;23369324;23369513;23371782;23369324;23369513;23371512;23371839;23371209;23371209;23371602;23371209;23371783;23371783;23371783	+;+;+;+;+;+;+;+;+;+;+;+;+;+;+	2674	61	18	7	22	74	69	71	60	48	54	473	61	35	111	158	86	97	50	90	103	63	26	58	6	58	16	29	52	82	87	881	73	103	111	71	9	97	59	30	58	66	51	172	22
ENSG00000201405.1	chr1	23370254	23370346	+	93	0	0	0	0	0	0	0	0	0	0	0	0	0	0	0	0	0	0	0	0	0	0	0	0	0	0	0	0	0	0	0	0	0	0	0	0	0	0	0	0	0	0	0	0
ENSG00000271420.1	chr1	23378380	23379029	-	650	19	5	2	19	19	45	2	17	60	19	51	2	0	23	22	16	13	26	24	0	23	13	19	0	5	23	4	7	9	0	101	10	18	47	7	2	6	10	8	18	29	0	16	8
ENSG00000204219.11	chr1;chr1;chr1;chr1;chr1;chr1;chr1;chr1;chr1;chr1;chr1;chr1;chr1;chr1;chr1;chr1;chr1;chr1;chr1;chr1;chr1;chr1;chr1;chr1;chr1;chr1;chr1;chr1;chr1;chr1;chr1;chr1;chr1;chr1;chr1;chr1;chr1;chr1;chr1	23380909;23383433;23384346;23384346;23387273;23387273;23393879;23393879;23397545;23397545;23397792;23397792;23403481;23404069;23408560;23408664;23408664;23408664;23408664;23417249;23417249;23417249;23417249;23417249;23417345;23417904;23417904;23417904;23417904;23417904;23417904;23419077;23419077;23419077;23419077;23419077;23424565;23424565;23424565	23381474;23384068;23384417;23384417;23387419;23387419;23394033;23394033;23397601;23397601;23397955;23397955;23404160;23404160;23408726;23408726;23408726;23408726;23408726;23417390;23417390;23417390;23417390;23417390;23417390;23418298;23418009;23418009;23418009;23418009;23418009;23419386;23419236;23419139;23419139;23419139;23424707;23424618;23424748	-;-;-;-;-;-;-;-;-;-;-;-;-;-;-;-;-;-;-;-;-;-;-;-;-;-;-;-;-;-;-;-;-;-;-;-;-;-;-	3675	1315	193	351	789	2643	2183	1311	495	2398	943	3676	561	188	1631	927	520	503	1195	1622	522	626	1209	318	222	703	1279	1006	970	2267	1258	2766	524	831	980	536	461	482	572	1397	1645	922	622	1798	1323
ENSG00000232482.2	chr1;chr1;chr1	23410832;23411463;23412102	23411128;23411546;23412146	+;+;+	426	35	9	17	22	46	3	1	42	22	25	13	4	0	45	19	16	4	29	31	3	11	5	17	0	48	0	12	0	73	14	5	0	8	23	19	1	18	11	2	44	1	31	4	7
ENSG00000088280.19	chr1;chr1;chr1;chr1;chr1;chr1;chr1;chr1;chr1;chr1;chr1;chr1;chr1;chr1;chr1;chr1;chr1;chr1;chr1;chr1;chr1;chr1;chr1;chr1;chr1;chr1;chr1;chr1;chr1;chr1;chr1;chr1;chr1;chr1;chr1;chr1;chr1;chr1;chr1;chr1;chr1;chr1;chr1;chr1;chr1;chr1;chr1;chr1;chr1;chr1;chr1;chr1;chr1;chr1;chr1;chr1;chr1;chr1;chr1;chr1;chr1;chr1;chr1;chr1;chr1;chr1;chr1;chr1;chr1;chr1;chr1;chr1;chr1;chr1;chr1;chr1;chr1;chr1;chr1;chr1…	23428563;23428563;23428563;23429532;23429627;23429722;23431035;23431035;23431035;23431035;23431035;23431035;23431696;23431696;23431696;23431696;23431696;23431696;23433077;23433077;23433077;23433077;23433158;23433203;23433362;23433425;23433425;23433425;23433425;23433425;23433626;23433626;23433626;23433626;23433626;23434254;23434254;23434254;23434254;23434254;23434533;23434533;23434533;23434533;234…	23429930;23429930;23429930;23429930;23429930;23429930;23431125;23431125;23431125;23431125;23431125;23431125;23431918;23431918;23431918;23431823;23431918;23431918;23433272;23433272;23433272;23433272;23433272;23433272;23433532;23433532;23433532;23433532;23433532;23433532;23433693;23433693;23433693;23433693;23433693;23434369;23434369;23434369;23434369;23434369;23434618;23434618;23434618;23434618;234…	-;-;-;-;-;-;-;-;-;-;-;-;-;-;-;-;-;-;-;-;-;-;-;-;-;-;-;-;-;-;-;-;-;-;-;-;-;-;-;-;-;-;-;-;-;-;-;-;-;-;-;-;-;-;-;-;-;-;-;-;-;-;-;-;-;-;-;-;-;-;-;-;-;-;-;-;-;-;-;-;-;-;-;-;-;-;-;-;-;-;-;-;-;-;-;-;-;-;-;-;-;-;-;-;-;-;-;-;-;-;-;-;-;-;-;-;-;-;-;-;-;-;-;-;-;-;-;-;-;-;-;-;-;-;-;-;-	4988	1066	273	352	448	532	1820	1005	533	913	950	1257	703	289	788	534	899	467	399	303	655	671	867	452	211	696	1057	1104	758	835	715	1113	922	1083	885	554	286	474	570	562	724	507	600	728	505
ENSG00000007968.7	chr1;chr1;chr1;chr1;chr1;chr1;chr1;chr1;chr1	23506438;23516335;23516359;23519016;23519016;23520913;23521837;23524383;23530542	23510148;23516527;23516527;23519396;23519130;23521071;23522056;23524488;23531233	-;-;-;-;-;-;-;-;-	5462	6	42	14	10	24	218	13	133	1	18	51	55	9	2	14	48	69	61	104	100	149	76	199	25	134	6	34	4	62	19	207	7	39	18	59	17	181	6	2	216	6	51	21	7
ENSG00000235052.1	chr1;chr1	23549139;23550765	23549443;23550915	-;-	456	3	0	0	0	0	0	6	50	0	0	1	0	2	0	15	9	68	0	0	0	32	4	30	0	0	0	10	5	3	11	6	0	0	10	17	0	18	4	0	0	0	0	4	0
ENSG00000117318.9	chr1;chr1;chr1;chr1;chr1;chr1;chr1	23557926;23557934;23558445;23558935;23558935;23559127;23559127	23558415;23558415;23559019;23559075;23559019;23559443;23559501	-;-;-;-;-;-;-	1496	198	72	73	93	246	129	328	114	130	402	365	222	88	158	143	156	61	190	124	176	145	219	116	104	57	94	494	255	91	233	158	356	349	382	91	72	88	241	209	28	165	77	337	131
ENSG00000285802.1	chr1;chr1;chr1;chr1	23576436;23585226;23585403;23593435	23577333;23585318;23585546;23593621	-;-;-;-	1322	0	0	0	3	0	0	0	23	0	0	0	0	0	0	0	50	7	24	0	0	33	0	46	0	0	3	4	1	2	1	0	0	0	0	7	2	38	0	0	0	10	0	0	0
ENSG00000197880.9	chr1;chr1;chr1;chr1;chr1;chr1;chr1;chr1;chr1;chr1;chr1;chr1;chr1;chr1	23581495;23592482;23626736;23627334;23627781;23628507;23628507;23629481;23629481;23639109;23639680;23639680;23640389;23640389	23581678;23592812;23627537;23627537;23627998;23628597;23628597;23629557;23629557;23639251;23639795;23639795;23640568;23640568	+;+;+;+;+;+;+;+;+;+;+;+;+;+	2142	6	0	0	0	0	2	8	137	11	0	1	6	18	1	0	37	116	0	2	5	107	7	203	9	0	0	30	1	31	4	2	4	5	3	30	11	119	0	0	0	3	0	0	6
ENSG00000229239.2	chr1;chr1;chr1;chr1;chr1;chr1;chr1	23670294;23670695;23670911;23676282;23676518;23677674;23680206	23670346;23670813;23671212;23676478;23676743;23677908;23680259	+;+;+;+;+;+;+	1186	0	0	0	0	6	0	0	49	0	0	0	0	0	0	0	24	30	0	0	0	52	0	112	11	1	0	1	0	3	0	0	0	0	35	0	4	34	0	2	0	0	0	2	0
ENSG00000142676.14	chr1;chr1;chr1;chr1;chr1;chr1;chr1;chr1;chr1;chr1;chr1;chr1;chr1;chr1;chr1;chr1;chr1;chr1;chr1;chr1;chr1;chr1;chr1;chr1;chr1;chr1;chr1;chr1;chr1;chr1;chr1;chr1	23691742;23691806;23691806;23691821;23692306;23692609;23692609;23692609;23692609;23692612;23693807;23693807;23693807;23693807;23693807;23693807;23694660;23694660;23694660;23694660;23694660;23694660;23695798;23695798;23695798;23695798;23695798;23696344;23696344;23696344;23696344;23696344	23691829;23691829;23691829;23692060;23692759;23692759;23692759;23692759;23692759;23692759;23693913;23693913;23693913;23693913;23693913;23693913;23694791;23694791;23694791;23695908;23694791;23694791;23695946;23695908;23695908;23695908;23695908;23696418;23696835;23696425;23696412;23696417	+;+;+;+;+;+;+;+;+;+;+;+;+;+;+;+;+;+;+;+;+;+;+;+;+;+;+;+;+;+;+;+	2659	2147	2249	820	1557	6635	3089	3694	665	2214	2168	2835	2057	514	2635	3058	1187	607	2135	3811	2064	1323	2779	318	865	4764	2235	2284	1964	1317	2012	2473	2820	2969	2795	1299	1362	766	1560	2036	4116	1796	1490	2224	1859
ENSG00000236810.6	chr1;chr1;chr1;chr1;chr1;chr1;chr1;chr1;chr1;chr1;chr1;chr1;chr1;chr1;chr1;chr1;chr1	23706901;23760382;23760521;23760813;23771611;23771702;23772111;23772111;23772111;23772111;23772111;23772268;23772268;23772272;23778199;23778199;23778199	23708261;23761151;23761151;23761151;23771883;23771883;23772166;23772694;23772166;23772166;23772166;23772397;23772426;23772426;23778296;23778283;23778287	-;-;-;-;-;-;-;-;-;-;-;-;-;-;-;-;-	3086	100	97	74	90	334	184	80	102	49	50	62	51	42	142	240	98	68	130	93	45	159	77	168	18	53	12	62	36	95	58	46	23	72	148	144	27	108	111	80	140	152	58	81	65
ENSG00000011007.12	chr1;chr1;chr1;chr1;chr1;chr1;chr1;chr1;chr1;chr1;chr1;chr1;chr1;chr1;chr1;chr1;chr1;chr1;chr1;chr1;chr1;chr1;chr1;chr1;chr1;chr1;chr1;chr1;chr1;chr1;chr1;chr1;chr1;chr1;chr1;chr1;chr1	23743155;23743366;23743472;23744034;23749021;23749021;23749021;23749021;23749842;23749842;23749842;23749842;23750845;23750845;23750845;23750845;23752407;23752407;23752407;23754100;23754100;23754100;23754363;23754363;23754363;23755843;23755843;23755843;23756274;23756274;23756274;23756953;23756953;23756953;23759512;23759512;23759512	23743578;23743578;23743578;23744270;23749077;23749077;23749077;23749077;23749948;23749948;23749948;23749948;23750944;23752030;23752030;23752030;23752518;23752518;23752518;23754255;23754255;23754255;23754460;23754460;23754460;23756023;23756023;23756023;23756385;23756385;23756385;23757125;23757125;23757125;23759893;23762040;23762059	+;+;+;+;+;+;+;+;+;+;+;+;+;+;+;+;+;+;+;+;+;+;+;+;+;+;+;+;+;+;+;+;+;+;+;+;+	5391	535	340	183	546	1733	1243	820	292	612	490	1001	771	139	1102	843	412	285	709	798	568	487	507	346	214	1327	540	494	425	860	718	799	613	812	628	328	388	360	388	400	945	497	556	754	698
ENSG00000057757.10	chr1;chr1;chr1;chr1;chr1;chr1;chr1;chr1;chr1;chr1;chr1;chr1;chr1	23778418;23779357;23779438;23779864;23785192;23785675;23785675;23785675;23786315;23786315;23786315;23787275;23787275	23778713;23779941;23779481;23779941;23785311;23785779;23785779;23785779;23786423;23786378;23786423;23788232;23788232	+;+;+;+;+;+;+;+;+;+;+;+;+	2173	159	216	121	269	476	500	260	122	277	106	410	217	59	509	383	184	130	290	365	268	227	268	131	68	519	174	270	203	217	278	160	203	377	171	91	146	146	185	149	285	171	246	182	132
ENSG00000011009.11	chr1;chr1;chr1;chr1;chr1;chr1;chr1;chr1;chr1;chr1;chr1;chr1;chr1;chr1;chr1;chr1;chr1;chr1;chr1;chr1;chr1;chr1;chr1;chr1;chr1;chr1;chr1;chr1;chr1;chr1;chr1;chr1;chr1;chr1;chr1;chr1;chr1;chr1;chr1;chr1;chr1;chr1;chr1;chr1;chr1;chr1;chr1;chr1;chr1;chr1;chr1;chr1;chr1;chr1;chr1;chr1;chr1;chr1;chr1;chr1;chr1;chr1;chr1;chr1;chr1;chr1;chr1;chr1;chr1;chr1;chr1;chr1;chr1;chr1;chr1;chr1	23791145;23791187;23791187;23791203;23791203;23791221;23791971;23791992;23792552;23792657;23792657;23792657;23792657;23792657;23792657;23792657;23793008;23793008;23793008;23793008;23793008;23793008;23793151;23793151;23793151;23793151;23793151;23793151;23793151;23793151;23793653;23793705;23793705;23793705;23793705;23793705;23793705;23793705;23793705;23793860;23793860;23793860;23793860;23793860;237…	23791250;23791250;23791250;23791250;23791250;23791250;23792017;23792017;23792760;23792760;23792760;23792760;23792760;23792760;23792760;23792760;23793039;23793039;23793039;23793039;23793039;23793039;23793216;23793216;23793216;23793216;23793216;23793216;23793216;23793216;23793752;23793752;23793752;23793752;23793752;23793752;23793752;23793752;23793752;23793907;23793930;23793930;23793930;23793930;237…	+;+;+;+;+;+;+;+;+;+;+;+;+;+;+;+;+;+;+;+;+;+;+;+;+;+;+;+;+;+;+;+;+;+;+;+;+;+;+;+;+;+;+;+;+;+;+;+;+;+;+;+;+;+;+;+;+;+;+;+;+;+;+;+;+;+;+;+;+;+;+;+;+;+;+;+	2021	195	92	130	112	443	441	204	157	224	236	402	323	57	380	230	190	108	175	364	294	159	181	141	80	330	206	213	167	166	142	211	172	353	362	113	104	128	190	201	348	252	152	144	150
[truncated: 59,889 more rows]
[truncated: 34 more columns]
